# Supplementary material for: Evaluated the Role of N6-Methyladenosine-associated lncRNAs in Prognosis and Immune Microenvironment of Colorectal Cancer
Source: Research Square preprint supplement (doi:10.21203/rs.3.rs-1316777/v1), 2022-02-04
Supplement: Supplementary file 1 [file 14af4a410d74a5dc52f80077.xlsx]

## Sheet: supplementary data 2
id	coef	HR	HR.95L	HR.95H	pvalue
AC137932.3	-1.40414	0.245578	0.0917534	0.657291	0.0051842
AL391422.4	0.948426	2.58164	1.61555	4.12546	7.32101e-05
AC092123.1	-1.38659	0.249927	0.109254	0.571729	0.00102273
AC156455.1	0.197746	1.21865	1.06804	1.39051	0.00330494
AC132192.2	-0.482294	0.617365	0.382316	0.996923	0.0485447
AC008760.1	0.597316	1.81724	1.27712	2.58578	0.000902742
`RPARP-AS1`	0.357238	1.42938	1.18449	1.72489	0.000194688
LINC02657	0.720459	2.05538	1.42802	2.95834	0.000105526
AP001619.1	0.802473	2.23105	1.2921	3.85234	0.00398271
AC003101.2	1.09594	2.99198	1.28327	6.9759	0.011167
AL161729.4	0.304719	1.35624	0.955076	1.92592	0.0885548
`TNFRSF10A-AS1`	-0.232947	0.792195	0.688535	0.911463	0.00113171
AL121906.2	1.02629	2.7907	1.42831	5.45258	0.00267208
AC074117.1	0.255829	1.29153	0.939452	1.77556	0.115175
