# Supplementary material for: Evaluated the Role of N6-Methyladenosine-associated lncRNAs in Prognosis and Immune Microenvironment of Colorectal Cancer
Source: Research Square preprint supplement (doi:10.21203/rs.3.rs-1316777/v1), 2022-02-04
Supplement: Supplementary file 3 [file 6d5961583d4e910a98315eb3.xlsx]

## Sheet: supplementary data 1
ID	TCGA-AA-3534-11A-01R-A32Z-07	TCGA-AZ-6598-11A-01R-1774-07	TCGA-A6-2678-11A-01R-A32Z-07	TCGA-AA-3514-11A-01R-A32Z-07	TCGA-A6-5667-11A-01R-1723-07	TCGA-AZ-6603-11A-02R-1839-07	TCGA-AA-3713-11A-01R-1723-07	TCGA-AA-3655-11A-01R-1723-07	TCGA-AA-3489-11A-01R-1839-07	TCGA-AA-3531-11A-01R-A32Z-07	TCGA-AA-3660-11A-01R-1723-07	TCGA-AA-3663-11A-01R-1723-07	TCGA-A6-2675-11A-01R-1723-07	TCGA-AA-3525-11A-01R-A32Z-07	TCGA-AA-3496-11A-01R-1839-07	TCGA-A6-2683-11A-01R-A32Z-07	TCGA-AZ-6601-11A-01R-1774-07	TCGA-A6-2679-11A-01R-A32Z-07	TCGA-A6-5662-11A-01R-1653-07	TCGA-AA-3511-11A-01R-1839-07	TCGA-AA-3518-11A-01R-1672-07	TCGA-A6-2671-11A-01R-A32Z-07	TCGA-AA-3527-11A-01R-A32Z-07	TCGA-AZ-6600-11A-01R-1774-07	TCGA-AA-3517-11A-01R-A32Z-07	TCGA-A6-5659-11A-01R-1653-07	TCGA-AZ-6605-11A-01R-1839-07	TCGA-A6-2680-11A-01R-A32Z-07	TCGA-AA-3516-11A-01R-A32Z-07	TCGA-A6-2686-11A-01R-A32Z-07	TCGA-F4-6704-11A-01R-1839-07	TCGA-A6-5665-11A-01R-1653-07	TCGA-A6-2684-11A-01R-A32Z-07	TCGA-AZ-6599-11A-01R-1774-07	TCGA-AA-3712-11A-01R-1723-07	TCGA-AA-3697-11A-01R-1723-07	TCGA-A6-2682-11A-01R-A32Z-07	TCGA-AA-3522-11A-01R-A32Z-07	TCGA-AA-3662-11A-01R-1723-07	TCGA-AA-3520-11A-01R-A32Z-07	TCGA-A6-2685-11A-01R-A32Z-07	TCGA-AA-3867-01A-01R-1022-07	TCGA-CA-6719-01A-11R-1839-07	TCGA-NH-A50V-01A-11R-A28H-07	TCGA-AA-A01C-01A-01R-A00A-07	TCGA-AA-A02F-01A-01R-A089-07	TCGA-AA-A03F-01A-11R-A16W-07	TCGA-AA-A00O-01A-02R-A089-07	TCGA-AZ-4615-01A-01R-1410-07
AC124283.2	0.47185	0.360165	0.21894	0.291661	0.0675143	0.59148	0.0795105	0.210525	0.226426	0.419874	0.08818	0.409263	0.446281	0.721043	0.21003	0.103886	0.840271	0.067012	0.298735	0.269248	0.0604577	0.165018	0.410539	0.316358	0.222081	0.511141	0.322718	0.38629	0.107147	0.507832	0.598584	0.298041	0.507651	0.123899	0.144043	0.415047	0.22531	0.693863	0.243009	0.311022	0.268683	0.496505	1.13145	1.07804	0.927645	0	1.27207	0.987727	0.121934
GEMIN7-AS1	0.449246	0.457216	0.382162	0.259176	0.342827	0.492753	0.126169	0.178169	0.239532	0.192477	0.363808	0.259772	0.188845	0.526319	0.233296	0.280245	0.466677	0.212673	0.11851	0.640874	0.364556	0.0698279	0.231628	0.326304	0.112769	0.283882	0.122903	0.551678	0.170024	0.273986	0.25905	0.283763	0.342361	0.452195	0.70857	0.188173	0.411158	0.205528	0.231368	0.25382	0.272866	0.367671	0.179542	0.583637	0.0981341	0.560614	0.726678	1.7017	0.270882
AC078778.1	0.15122	0.26933	0.122792	0.0981462	0.113595	0.124399	0.0445932	0.0787148	0	0.026165	0.197822	0.0459068	0	0	0	0.0582643	0.471263	0.0751668	0	0.0377517	0.0678149	0.0925497	0.0767498	0.0887142	0.0498214	0.215004	0.0361991	0.0812436	0	0.142408	0.0305194	0.125366	0.0355893	0.24321	0.282751	0.0997618	0.126364	0.0778301	0	0.0249194	0.210966	0	0.0793215	0.142262	0	0.0825595	0	0	0.136772
AL117209.1	0.310659	0.553297	0.441449	0.134418	0.466729	0.113581	0.122147	0.107805	0.115947	0.26876	0.135465	0.157181	0.399928	0.221538	0.161327	0.119695	0.618533	0.128682	0.200781	0.103407	0.092877	0.190129	0.17519	0.78975	0.272935	0.343539	0.148731	0.31526	0.102877	0.117022	0.376185	0.286162	0.438677	0.356884	0.608529	0.0455434	0.49756	0.266484	0.217769	0.307159	0.371483	0.381373	0.434544	0.389674	0.831295	1.01764	2.44274	0.596113	0.374636
AC012615.4	0.211883	0.125791	0.200725	0.0305595	0.530549	0.193668	0.0416546	0.0367638	0.0395406	0.0733223	0.0923929	0.171526	0.194834	0.0755492	0	0.0816373	0.18342	0.0702135	0.0782519	0.141056	0.126692	0.201719	0.0477948	0.0828682	0.0930766	0.13389	0	0.101186	0.0841995	0.106419	0.285083	0.117105	0.0664881	0.227183	0.188656	0.0621252	0.177056	0.0484675	0.0424366	0.0232772	0.112608	0	0.25933	0.89699	0.485982	0	0.266568	0	0
AC103591.3	0.410248	0.274001	0.666248	0.443771	0.102725	0.449978	0.725866	0.213547	0.344514	0.354918	0.536674	0.124541	0.113172	1.86505	0	0.790332	0.319625	0.203922	0.113634	0.512086	0.0919882	0.167387	0.416432	0	0.675807	0.194429	0	0.514284	0.244541	0.309073	0.24839	0.226739	0.0965509	0.282775	0.876662	0.451076	0.257113	0.351911	0	0.202813	0.163524	0	0.430385	0.771891	0	1.11989	0	0.429388	0.371051
LINC02577	0.0060518	0	0	0	0.0121228	0.0132757	0	0	0.0135523	0.00418847	0	0	0	0.012947	0	0	0.0125732	0.0120326	0.0067051	0.00604325	0	0	0.00409535	0	0	0	0	0.00433513	0.00480982	0.00455931	0.0146566	0.00668951	0	0.00556183	0	0.0372628	0	0	0.00727245	0	0	0.148587	0.088884	0.48393	0.916122	0.198241	0.182729	0.0253365	0.339362
MIR222HG	0.26169	0.82935	0.781226	0.213138	2.60564	0.371454	0.344993	0.136217	0.232686	0.271674	0.251717	0.39254	0.356704	0.197594	0.443664	0.237241	0.527696	0.397885	1.91872	0.453468	0.179484	0.207265	0.145839	2.8537	0.324582	2.33455	0.103177	0.308755	0.15293	0.156562	2.06909	1.93978	0.217369	0.325386	0.847034	0.758262	0.778231	0.184864	0.258977	0.182641	0.589038	0.359053	0.613666	1.28162	1.23575	1.42871	0.464796	1.99785	0.334146
AL121845.4	0.210152	0.311908	0.113763	0.121239	0.350809	0	0	0.218781	0.078435	0.0969644	0.274914	0.255188	0.0772971	0.299728	0.109133	0.0539802	0.218306	0.0696399	0.388063	0.139903	0.188486	0.057163	0.0948086	0.328765	0	0.132797	0.0670747	0.10036	0	0.158324	0.226203	0.154864	0.26378	0.321895	0.224537	0.0616176	0.292683	0.0961431	0.336719	0.0923483	0	0.171992	0.220467	0.659008	0	0.458934	0	1.90629	0.126715
AC091057.1	0.67686	1.00598	0.513605	0.601893	0.897681	0.801291	0.423975	0.332888	0.216909	0.19546	0.430511	0.385449	0.224064	0.561745	0.283622	0.489207	0.737067	0.710017	0.462887	0.771464	0.270045	0.333306	0.303255	0.416254	0.2676	0.46901	0.248068	0.305964	0.157675	0.411463	0.657587	0.397312	0.287834	0.915929	0.798007	0.44756	0.442733	0.589421	0.384253	0.369232	0.703326	0.395409	0.489713	1.07811	0.588869	2.60969	0.713543	0.669352	0.586858
AC011468.1	0.793906	1.13119	0.567298	0.219847	0.572521	0.801127	0.337124	0.495903	0.213343	0.527486	1.45399	0.616987	0.455537	0.475568	0.346315	0.758602	0.82471	0.694542	0.703688	0.570805	0.398752	0.46645	0.515759	0.7452	0.62775	1.50503	0.516923	0.38672	0.429064	0.741661	0.538363	0.526539	0.29895	0.729629	1.0179	0.5028	0.796096	0.544811	1.25933	0.690765	0.55695	0.545788	0.732931	0.149375	1.01972	2.3579	0.119857	1.92779	0.861664
LINC01730	0.0508552	0.158507	0.0206474	0.0660129	0.076404	0.139451	0.0299933	0.0264717	0.142355	0.035197	0.0332636	0	0.168348	0.0815985	0.0792282	0.0195942	0.0528284	0.0758356	0.0563451	0.0507834	0.0228061	0.0414992	0.0516218	0.0298345	0.0167549	0.0482037	0.0243474	0.0182148	0.0606277	0	0.0821092	0.0562141	0	0.116845	0.0271682	0.0894661	0.106241	0.0174495	0.0611127	0.0167607	0	0.124862	0.133379	0.406662	0.116643	0	0	1.22424	0.36797
AC093227.1	1.05601	1.10883	0.947076	0.327346	1.01033	0.795237	0.52056	0.656342	0.476493	0.349072	0.927835	1.55026	0.66089	0.691247	0.491099	0.89877	1.30983	0.705104	1.34464	0.960086	0.989549	0.450159	0.66129	0.628762	1.01778	1.70312	0.739499	0.429038	0.488543	0.795579	0.699815	0.85369	0.816068	1.15882	0.926216	0.402055	1.08	1.03835	1.47735	0.75841	0.816717	0.890058	1.45508	2.01657	0.43381	0.998181	0.356927	1.4847	0.59873
AL033504.1	0.0338366	0.0451983	0.0412132	0.0292812	0	0.0185567	0	0	0.0189433	0.0351276	0.044264	0	0.0186684	0.0180972	0	0.0391111	0.0878736	0.0504573	0	0	0.0303481	0.0828345	0.0228977	0.0794017	0.0111479	0.0320724	0.0323992	0	0	0	0.0409736	0.0187011	0.0318534	0.0466456	0.0180764	0.0148816	0.0565499	0.0464401	0.0203307	0.0334553	0.0539486	0.124616	0	0	0	0	0.0638544	0	0.0612074
AC137932.3	0.275264	0.438103	0.261561	0.0658867	0.334362	0.192716	0.0621746	0.103652	0.0590191	0.149977	0.153231	0.213354	0.206801	0.238063	0.0729939	0.139906	0.316364	0.19796	0.084356	0.216391	0.120816	0.0955841	0.110973	0.28174	0.127351	0.277567	0.151413	0.184596	0.0837854	0.145606	0.226944	0.16832	0.143349	0.312186	0.513123	0.113336	0.23002	0.188897	0.14076	0.131256	0.116723	0.0862779	0.356361	0.964205	0.617923	0.588338	0.419991	0.80915	0.190696
SOS1-IT1	0.495716	0.837226	0.569087	0.488148	0.376659	0.637469	0.383096	0.355911	0.382793	0.366748	0.514313	0.539679	0.660169	0.548545	0.292936	0.513716	1.18971	0.475817	0.606047	0.802268	0.567261	0.265029	0.497405	0.621743	0.428011	0.550883	0.360085	0.391835	0.339641	0.360585	0.620975	0.566848	0.370112	0.706937	0.456595	0.345825	0.657065	0.434024	0.390288	0.47323	0.504198	0.209847	0.771107	0.482432	0.627307	2.09045	0.193549	0.858776	1.02039
AL158837.1	1.04332	1.14026	2.04094	1.10805	2.37495	0.520163	0.671265	0.691192	0.530998	1.08313	1.11669	1.20932	0.837271	0.913109	0.664939	1.20596	1.13306	1.13149	1.15595	1.23127	1.27603	0.851375	0.802307	1.66928	1.59368	1.43843	0.181636	0.339713	1.05535	1.03611	1.26338	2.04441	0.75895	1.0896	2.0268	0.792577	1.30775	1.69229	1.70967	1.3129	1.70126	0	0.0995028	1.07074	0	0	2.14788	0	0
AC005253.1	0.696304	0.696392	1.1395	0.278105	0.53647	0.481742	0.265353	0.501851	0.455793	0.259493	0.462449	0.533331	0.378257	0.527108	0.200268	0.321939	0.701066	0.394034	0.403539	0.748808	0.211375	0.209798	0.318966	0.389638	0.296463	0.629539	0.410292	0.345316	0.221362	0.306679	0.389157	0.355236	0.413466	0.600549	1.21324	0.244992	0.44758	0.382266	0.566415	0.324811	0.307434	0.15781	2.28136	1.14887	0.83539	0.467878	0.323452	0.896972	0.348799
AC010422.4	0.2413	0.358138	0.0326561	0.0348023	0.0402806	0.176445	0	0.041868	0.0450302	0.0278341	0.0526102	0.488351	0.0443769	0.0430191	0	0.0929715	0.751987	0.0399809	0.133674	0.281119	0.0721408	0.0656356	0.190507	0.14156	0.238498	0.228719	0	0.115235	0.0639264	0.151492	0.0324663	0.177818	0.227157	0.221763	0.128909	0.0353752	0.168032	0.110393	0.28997	0.053018	0	0.197484	0.210953	0.605348	0.36897	0	0.151789	0.168372	0
SOCAR	0.120559	0.0644165	0	0.0834629	0.0483004	0.105788	0.0853239	0.0502039	0.0269979	0.0500637	0.12617	0.0292791	0.0532124	0.232129	0.0751287	0.260125	0.0250474	0	0.133574	0.240778	0	0.0590278	0.0979014	0.0282908	0.0953276	0	0	0.172723	0.0383271	0.0726617	0.0583954	0.0266527	0.181589	0.0443194	0.0772873	0.106046	0.060446	0.0992794	0.0289753	0.0635739	0.0192219	0.296004	0.0758863	0.226835	0.110608	0.105312	0	0.0504736	0.305314
EPS15-AS1	2.29666	2.76707	3.21786	2.0654	3.3828	0.790297	2.07161	3.14107	1.05887	3.74006	2.53314	0.984295	0.993819	2.60121	1.19267	3.15784	1.40339	2.86518	1.54671	3.01292	2.42339	2.71933	2.77315	1.79646	2.04744	1.62201	0.388075	5.54846	2.25481	2.74805	2.32666	2.14045	3.17949	2.48319	3.12748	2.33707	3.16097	3.02851	1.89404	1.92942	1.61548	0.663398	0.566915	0.932026	1.44603	2.85194	1.35972	0.377067	0.488759
MORF4L2-AS1	0.256897	0.247074	0.275354	0.106709	0.298474	0.281776	0.109089	0.181863	0.13807	0.106679	0.134426	0.199648	0.0793722	0.241823	0.144081	0.174206	0.245515	0.0919407	0.193548	0.492545	0.165896	0.184478	0.0695384	0.204966	0.121879	0.253243	0.108233	0.139859	0.122505	0.13935	0.091251	0.17038	0.183799	0.283317	0.47211	0.0994271	0.206084	0.253862	0.197576	0.101601	0.122878	0.126149	0.237166	0.386686	0.424244	0.538576	0.038784	0.301148	0.0929407
AL355472.3	0.0684839	0.152466	0.0556093	0	0.0685928	0	0	0.142592	0.0766809	0.0473979	0.179177	0.0415801	0.0377842	0.0732562	0	0.0791595	0.0711411	0.102124	0.189692	0.205162	0.0921351	0	0	0.080353	0.15794	0.0649133	0.0655747	0.0981153	0	0.103189	0.027643	0.0757005	0.0644701	0.188818	0.109758	0.0301198	0.143068	0.0704947	0.123446	0.112854	0.10919	0	0.0718455	0.193281	0	0.224335	0.129239	0.573432	0
LINC02649	0.0625143	0.0494848	0.0282011	0.0120218	0.11827	0.129518	0.032773	0.028925	0.0544419	0.00961475	0.045433	0.0674767	0.0689812	0.0520105	0.0216427	0.0642305	0.0360777	0.0207159	0.0538711	0.0762985	0.0436094	0	0.0423044	0.0407493	0.0320384	0.0395033	0.0532077	0.0746356	0.0331232	0.0680291	0.0728965	0.0383899	0.0326946	0.057453	0.0445291	0.0305492	0.0464347	0.0381332	0.0918176	0.0320496	0.0221494	0.0511629	0.102018	0.189502	0.127453	0.27304	0.104865	0.0581608	0.163342
AL031710.2	0.059378	0.0528775	0.0482153	0.025692	0.148681	0.130257	0.0350198	0.0309081	0	0.102739	0.116515	0.144206	0.0655205	0.222305	0	0.0915121	0.0616819	0	0.065788	0.0592942	0.0266282	0.024227	0.040182	0.104503	0.0195628	0.0562822	0	0.0638021	0.0235961	0.0894685	0.143805	0	0.0279489	0.109141	0.0317213	0.182805	0.0496182	0.0203738	0	0	0.0473358	0.0728941	0.436048	0.335163	0.680958	0.518684	0.224109	0.124297	0.322229
AC007684.2	0	0.0400184	0	0.0388881	0.090019	0	0.053007	0.0935666	0.15095	0.0622036	0.293933	0.0545684	0	0.0480696	0.0700099	0.0692576	0.0466817	0.0893493	0.0497892	0	0.0806102	0.0366706	0.0304103	0.0527264	0	0.0851902	0.129087	0.0643817	0.107147	0.0338555	0.290222	0.0993469	0	0	0.0480143	0	0.0375517	0.0616767	0.108004	0.0592423	0.0358244	0	0.0471439	0.126828	0.206143	0.588821	0	0.0940692	0.162578
AC090510.2	0.136315	0.606956	0.276721	0.0589813	0.375461	0.411168	0	0.17739	0	0.0235859	0.0445807	0.372436	0.225624	0.10936	0.212367	0.131303	0.141604	0.237152	0.226545	0.170153	0.152826	0.0556181	0.0230616	0.199924	0.157187	0.258415	0.489464	0.146471	0.0541697	0.154045	0.220089	0.113009	0.0320813	0.344515	0.691818	0.119904	0.0854316	0.140317	0.0409523	0.0898524	0.135836	0	0.536271	0.577078	0.312656	0.595373	0.385867	0.214011	0.0616453
AL359922.2	0.0426294	0.120214	0.0403845	0.0430386	0.0355809	0.0545507	0.00838062	0.0739663	0.055687	0.0245866	0.0185888	0.0345099	0.0548791	0.0304	0.0221377	0.0437997	0.0811863	0.00706324	0.0393594	0.0709486	0.031862	0.0115956	0.028848	0.0916988	0.0374527	0.0808135	0.108849	0.040716	0	0.0481742	0.143392	0.0471215	0.0401309	0.124064	0.06073	0.0374975	0.0296854	0.058508	0.0597657	0.042149	0.0339839	0.0697773	0.193795	0.374305	0.162961	0.310316	0	0.223091	0.0899649
DNAJC3-DT	0.875934	0.982976	1.08713	0.585453	0.898725	0.929518	1.15081	1.31225	0.877117	0.625952	1.07134	1.19336	0.903682	0.746532	1.2315	0.828641	0.887728	1.16107	1.09674	1.52183	0.970858	0.743841	0.886728	0.802142	0.689795	1.02602	0.906913	0.535641	0.571652	0.718928	0.804861	0.543157	0.650291	1.14535	1.11851	1.05864	0.934289	1.07025	1.08684	0.844941	0.715321	1.48622	1.158	1.66149	2.6461	2.31723	0.430052	1.75906	0.528163
AC004832.4	0	0.46136	0.105171	0.0560412	0.0648626	0.0710313	0.229163	0	0	0.0448204	0	0	0.142918	0	0	0.0499032	0.134545	0.0643801	0.215252	0.129337	0.0580832	0	0.131472	0.0759833	0	0.122767	0.0620087	0.0463899	0	0.0487887	0.209118	0.0715838	0.182893	0	0.207578	0.0569637	0.0541153	0.0444408	0.155643	0.0853734	0.0516261	0.159002	0.0679385	0.243694	0	0	0	0.271124	0.117145
AL662797.2	0.194111	0.493888	0.180137	0.263966	0.138872	0.243326	0.0981281	0.115475	0.341542	0.134345	0.108828	0.23571	0.244791	0.326288	0.172806	0.256423	0.201643	0.165406	0.307237	0.221529	0.223842	0.135771	0.262717	0.357898	0.200994	0.262844	0.23897	0.0794569	0.132236	0.125349	0.29102	0.122609	0.31326	0.611643	0.444427	0.414663	0.139034	0.190296	0.133294	0.182785	0.24317	0.13617	0.610919	0.808713	0.763237	0.84781	0.313985	0.174144	0.451454
MALAT1	9.01979	16.4113	9.99611	4.46844	12.8327	6.83454	1.31403	2.28127	2.31101	7.93715	5.20148	11.1163	7.87259	6.2777	4.47806	5.97136	11.9055	6.39902	7.96441	7.99975	4.48193	3.10878	5.07162	11.8298	5.92401	12.7082	5.4436	5.68601	4.63514	6.52787	10.2364	12.9797	6.47208	13.7214	33.5079	4.0725	6.66157	7.89176	6.0374	5.79535	6.40784	19.1642	7.59263	29.9249	36.2548	57.2428	36.1039	343.203	51.2865
GAS8-AS1	0.0931977	0.165989	0.075677	0	0.0466729	0.153335	0	0	0.0521763	0.0322512	0	0.0565851	0.0514194	0.0996921	0.0725972	0	0.242035	0.0463257	0.0516293	0.0465331	0.0417946	0	0.0946025	0.10935	0	0	0.0446193	0.0667611	0	0.0702133	0.112856	0.0515092	0.0438677	0.0856521	0.348521	0.0409891	0.077879	0.191868	0.0559978	0	0.148593	0	0.0977723	0.745253	0	0.814108	1.40702	0.390183	0
AL162724.2	0.0695956	0.433836	0.0565121	0.180678	0.139413	0.229007	0.082092	0.43472	0.467554	0	0.182086	0.338041	0.537566	0.297782	0.108424	0	0.36148	0	0.616869	0.347487	0.124841	0.113584	0.235482	0.489945	0.0917167	0	0.133278	0.49854	0.110626	0.26216	0.280917	0.153859	0	0.191883	0	0.122435	0.116313	0.143278	0.0836331	0.32112	0.0554813	0.170875	0.292047	0.196419	0.638509	0.151985	0.525347	0.728426	0.125892
SNHG22	0.1984	0.456423	0.302066	0.0643836	0.231835	0.145076	0.0975099	0.0344244	0.0370245	0.108706	0.054071	0.160612	0.173315	0.09727	0.0901515	0.210217	0.334909	0.172582	0.109909	0.1651	0.148288	0.0944414	0.195796	0.290981	0.196096	0.250741	0.166225	0.230947	0.118263	0.186838	0.146818	0.146204	0.10895	0.205129	0.388632	0.167244	0.234868	0.170188	0.109275	0.207063	0.177934	0.608903	0.199466	0.272194	0.948037	0.577694	0.592814	2.63031	1.07666
MED4-AS1	0.158195	0.176096	0.0642278	0.0342244	0.118835	0.0433789	0.0466501	0.0411728	0.309978	0.0821156	0.103473	0.144073	0.13092	0.126914	0.184842	0.0304759	0.2465	0.117951	0.0876364	0.078986	0.0354715	0	0.16058	0.232016	0.0781792	0.374868	0.0378688	0.084991	0.0314324	0.148977	0.287344	0.0874326	0.186154	0.254428	0.295793	0.208727	0.0330483	0.1357	0.0475258	0.0782064	0.0315281	0.0971025	0.12447	0.18603	0	0.0863676	0	0.165576	0.500782
AL390066.2	0.27935	0.522412	0.287323	0.120871	0.401038	0.29619	0.0329509	0.0872462	0.0729834	0.212673	0.207081	0.214836	0.184949	0.378501	0.188589	0.107632	0.45463	0.22217	0.175387	0.511419	0.141978	0.144373	0.157534	0.0546275	0.134985	0.176524	0.106993	0.21345	0.133212	0.126274	0.240549	0.236737	0.166552	0.470677	0.457658	0.081907	0.264558	0.306722	0.201417	0.147308	0.20785	0	0.0879187	0.429243	0.384437	0.854071	0.702897	0.565274	0.101064
AC004069.1	0.117134	0.20862	0.126818	0.0675761	0.0782132	0.171303	0.0921105	0.121943	0.131154	0.0810686	0.153231	0.23706	0.0430836	0.292357	0.121656	0	0.121679	0	0.086519	0.194947	0.175096	0.22303	0.0792662	0.0458115	0.0514549	0.222053	0.112158	0.139846	0.0930949	0	0.12608	0.215795	0.0735123	0.2153	0.208587	0.274754	0.163134	0.26794	0.234599	0.180155	0.124504	0	0.122883	0.293853	0	0.341065	0	0	0.141256
AC024940.6	0.135667	0.120815	0.183605	0.195671	0.0905888	0.049602	0.21337	0.0470794	0.151906	0.0625973	0.295794	0.109827	0.0998013	0.0967476	0.070453	0.104544	0.140932	0.0899148	0.150313	0.270952	0.0405602	0.0369027	0.183617	0.2653	0.0595965	0.428647	0	0.129578	0.0718834	0.136279	0.14603	0.0499879	0.085144	0.207806	0.0483182	0.0795569	0.151158	0.248268	0.217375	0.178852	0.252358	0.444131	0.189769	0.127631	0.207448	0.197516	0	0	0.245411
AC022973.5	0.210381	0.104083	0.0189812	0	0.0936512	0.0769183	0.0827186	0.048671	0.0785205	0.0647134	0.0305793	0.0567702	0.0515876	0.100018	0.0364173	0.0900651	0.121413	0.16267	0.129495	0.210084	0.0209657	0.0572254	0.0632747	0.274269	0.0462084	0.221569	0.0447652	0.0334897	0.0557351	0.0176108	0.113225	0.155033	0.0440112	0.214831	0.124879	0.0411232	0.0586003	0	0.056181	0.092449	0.0745397	0.17218	0.122615	0.307873	0	0.459434	0	0.19573	0.126853
AC004076.2	0.109661	0.132122	0.0785693	0.027911	0.180905	0.0707534	0.0380444	0.00671551	0.0505591	0.0625031	0.0421927	0.117495	0.0925332	0.144903	0.100496	0.119299	0.120617	0.0577154	0.128646	0.103064	0.057856	0.0684305	0.0785745	0.174078	0.136016	0.0978291	0.117356	0.0831751	0.0563949	0.0777566	0.109357	0.0713038	0.0850159	0.142281	0.165413	0.0624149	0.107807	0.190348	0.147283	0.110551	0.133703	0.0633518	0.115044	0.358042	0.236727	0.394437	0.0730395	0.459108	0.0933491
AC023043.4	0.477405	0.722737	0.581483	0.950204	0.717245	0.785457	0.22525	0.347905	0.748364	0.528661	0.499621	0.405799	0.316074	0.561739	0.595006	0.331095	0.595114	0.427145	0.740518	0.429058	0.642278	0.545404	0.839975	1.00826	0.314574	0.633519	0.18285	0.649768	0.455315	0.575468	0.346861	0.633254	0.404482	0.438753	0.714119	0.587906	0.598402	0.589706	0.114739	0.346152	0.532818	0.93772	0.65109	0.853335	1.75199	0.729797	1.80186	0.999355	2.15896
CDC42-IT1	0.0619522	0	0.0251528	0.0268058	0.0620507	0	0	0	0	0	0.040522	0.0376143	0	0.0331347	0	0.0477397	0.128712	0.0307945	0	0.0618648	0	0	0.020962	0.0726893	0.0204109	0	0	0.0221894	0.024619	0.0233368	0	0.0684805	0	0.0284682	0.0992896	0.0272471	0.0258846	0.0637712	0	0	0.024694	0	0.0324966	0.174847	0	0	0	0.324213	0
MBNL1-AS1	0.533852	2.83795	1.57273	0.969031	1.22916	5.7984	2.59563	2.46709	6.83038	0.982278	0.621719	4.31645	7.931	0.571053	8.79368	0.597004	7.60161	1.10999	7.13746	0.750889	1.44812	2.70414	1.42965	1.72635	0.703537	1.72787	19.5586	2.20357	2.73979	0.902484	4.13627	1.44648	0.64659	0.74492	0.84516	1.74949	0.851406	0.717065	1.30653	0.808921	1.79576	0.671356	0.805935	0.257238	0.403177	0.497614	0.233434	0.463361	0.176651
AC002116.2	0.633396	0.920298	0.433113	0.60582	0.634403	0.548476	0.668481	0.277644	0.746535	0.230724	0.74137	0.364327	0.220711	0.820173	0.0519358	0.411022	0.346301	0.463977	0.258548	0.499344	0.478396	0.272036	0.248154	0.312914	0.307529	0.315986	0.223443	0.0955213	0.158971	0.527419	0.484419	0.221097	0.376594	0.367651	0.356187	0.351882	0.640715	0.343155	0.520788	0.461454	0.558091	0.3274	0.594541	0.188171	2.44679	1.82003	1.00657	0.418703	0.904546
AC005261.3	1.45483	1.35068	1.87253	0.87056	1.47264	1.23923	0.456396	0.853956	0.381245	1.18899	1.57922	1.82298	0.905129	1.39065	1.76015	1.59813	1.31835	1.30782	2.04057	0.880936	1.38813	1.46502	1.37202	1.41642	1.80506	1.52567	1.14109	1.28605	1.09476	1.77232	1.01203	1.35151	0.990745	1.52195	1.47173	1.07548	1.69422	1.39133	1.19031	1.36702	1.33251	1.70999	1.12032	3.80017	3.05286	3.48127	0.876211	5.86401	2.04373
AC068234.2	0.180383	0.562222	0.268531	0.130081	0.210781	0.296777	0.141848	0.156491	0.269297	0.187265	0.314628	0.876156	0.96204	0.0643175	1.35827	0.231668	0.468454	0.209213	1.26575	0.300213	0.134821	0.269861	0.345859	0.634935	0.198098	0.569926	2.04385	0.344573	0.167258	0.475639	0.33978	0.132927	0.0566035	0.524965	0.0642435	0.396669	0.175856	0.371358	0.252893	0.198167	0.191733	0.147628	0.126158	0.282828	0	0.0656539	0	0.314664	0.0543827
EIF1AX-AS1	0.0567076	0.0504994	0	0	0	0	0	0	0	0.0392475	0	0.0688601	0.125148	0	0	0.0436983	0.0589079	0	0.125659	0	0	0	0.0767498	0.0665357	0	0	0	0.0406218	0	0.0427224	0.0457791	0.0626832	0	0.0521164	0.121179	0	0.0947734	0	0	0.0373791	0.045207	0	0.0594911	0.160045	0	0.247678	0	0	0
AC107032.2	0.0555323	0.0494528	0.0450925	0	0	0.243641	0.0655035	0.115625	0.373074	0.0384341	0	0.067433	0	0.178206	0.17303	0.17117	0.115374	0.16562	0	0.166362	0.0498071	0	0.150318	0.0651567	0.0731833	0.105274	0.15952	0.0397799	0.0441357	0.125511	0.179321	0	0.104555	0.102072	0.118667	0.0488471	0	0.0381085	0.600599	0.0366044	0	0.136346	0.233033	0.261213	0.254742	0.363818	0.209594	0.92997	0.200906
C2orf27A	0.317439	0.342199	0.542657	0.195183	0.200806	0.384831	0.0591216	0.373957	0.430262	0.0520343	0.098352	0.0912947	0.414801	0.268073	0.559615	0.321862	0.104133	0.348796	0.601604	0.0750767	0.0524469	0.0681679	0.497468	0.27444	0.0605487	0.316724	0.511922	0.107713	0.265571	0.0692283	0.1079	0.120041	0.0629124	0.644894	0.606933	0.374748	0.258281	0.200642	0.411582	0.368925	0.359612	0.943476	1.70892	2.17688	0.574807	0.656744	0.189174	1.39894	0.846217
MCM3AP-AS1	0.479162	0.399095	0.427991	0.241474	0.429108	0.333889	0.206131	0.237681	0.189358	0.198978	0.44984	0.225894	0.34834	0.343712	0.223949	0.321454	0.491898	0.257791	0.252953	0.430637	0.275553	0.246106	0.244146	0.426616	0.315732	0.411434	0.207813	0.212003	0.170252	0.316399	0.407299	0.27729	0.289221	0.51808	0.653505	0.260325	0.350942	0.330755	0.37597	0.287974	0.31907	0.505188	0.422845	1.39211	0.362032	0.56629	0.574463	0.955833	0.397691
NFYC-AS1	0.648019	0.961793	0.546831	0.230908	0.572691	0.710776	0.164865	0.26456	0.398359	0.272615	0.182841	0.61717	0.392579	0.557259	0.395906	0.362279	0.633565	0.366321	0.366026	1.12926	0.341889	0.331796	0.240759	0.551611	0.376761	0.578102	0.45016	0.145632	0.0908876	0.268034	0.369272	0.393265	0.263154	0.840782	0.977476	0.279416	0.61583	0.340063	0.473343	0.226136	0.192458	0.343168	0.693158	1.49419	0.81602	1.08218	0.47957	1.03733	0.873411
LINC01588	0.667866	0.743437	0.754305	0.436091	1.11893	0.339634	0.494156	0.840668	0.68662	0.647125	1.56072	0.604557	0.750354	0.841051	0.335791	0.465525	1.12266	0.528143	0.585244	1.07011	0.462872	0.653995	0.517694	0.776491	0.638107	0.598515	0.14534	0.304448	0.528391	0.349923	0.835695	0.805356	0.728747	0.496615	0.989287	0.424578	0.730591	0.695809	1.23305	0.442228	1.04548	0.186339	0.197456	0.165643	0.473479	0.563512	0.137493	0.216062	0.192199
CARNMT1-AS1	0.0894386	0.398236	0.169458	0.180594	0.0298603	0.0654001	0.035166	0	0	0.0619008	0.0780007	0.0724037	0.0986908	0.127561	0.046446	0	0.278727	0.0296381	0.0660625	0.119083	0.106957	0.0243281	0.0806994	0.244859	0.0589334	0.226068	0.0285464	0.0427122	0.0473891	0.0449209	0.0722024	0.0988633	0.112262	0.136996	0.127415	0	0.124563	0.0818353	0.0716523	0.0393026	0.0713	0	0.0938288	0.364609	0.13676	0.32553	0	0.187223	0.0539289
AC016738.1	0.147619	0.471057	0.319646	0.0425816	0.190977	0.182154	0.0435311	0.0768401	0.0482088	0.123452	0.104602	0.126971	0.0814447	0.157905	0.00958241	0.156411	0.249188	0.0733767	0.14311	0.110558	0.0882664	0.0853263	0.108221	0.0721678	0.0891639	0.233204	0.0176685	0.0793087	0.0586618	0.125115	0.143997	0.231163	0.110015	0.197848	0.328591	0.032462	0.113075	0.147732	0.140436	0.064869	0.0833572	0.0906104	0.0967904	0.53235	0.169292	0.24178	0.650014	0.218883	0.211398
AP003392.1	0.737741	1.42345	1.06498	0.532016	1.92938	0.764231	0.241724	0.640028	0.275347	0.567325	0.375313	0.696765	0.316578	0.482258	0.383113	0.157915	1.2347	0.61118	0.408691	0.859482	0.514641	0.133781	0.305092	1.20222	0.75618	0.699277	0.510178	0.792708	0.195446	0.5558	0.661741	0.815481	0.347251	1.54436	2.10198	0.21631	0.753475	0.787528	1.08355	0.729428	0.65347	1.0063	0.902945	1.2724	0.752049	0.895052	0.309382	2.31648	0.593115
AL031670.1	0.512657	0.570666	0.41628	0.277274	0.449288	0.632592	0.113383	0.20014	0.143504	0.133054	0.419152	0.544705	0.601045	0.411286	0.399339	0.246905	0.565833	0.254826	0.1775	0.543929	0.25864	0.078439	0.195144	0.45113	0.147789	0.485928	0.368159	0.183618	0.178258	0.0965564	0.517325	0.460426	0.271468	0.500598	1.30091	0.112735	0.267745	0.373794	0.423541	0.1056	0.178801	0.393345	1.00841	0.994718	0.734906	0.559776	0.362796	1.14022	0.637554
AL162424.1	0.581958	1.46837	0.393795	0.251805	0.388589	1.70218	1.71613	1.11073	1.95484	0.335646	0.126883	1.29557	2.88972	0.415008	1.51107	1.19587	0.906808	0.674971	2.04181	0.484281	0.608954	0.633191	0.918914	1.59324	0.575201	0.735489	3.62204	0.486359	0.462526	0.876872	2.03583	0.428855	0.456541	1.3371	0.725428	0.426584	0.486303	0.599046	0.466226	0.959002	0.386612	0.476285	0.101754	0.182495	0	0	0	0.406073	0
AC021321.1	0.211851	0.188658	0.125109	0.0333327	0.115739	0.0844972	0.0681518	0.2005	0.15095	0.146623	0.100777	0.0935458	0.0637545	0.0618037	0.0600084	0.103886	0.160052	0.0957314	0.0426765	0.173088	0.103642	0.0785799	0.052132	0.158179	0.139594	0.365101	0.129087	0.206941	0.0918403	0.0870569	0.108833	0.127732	0.0543912	0.106199	0.16462	0.0847034	0.112655	0.0792986	0.138862	0.0634739	0.0460599	0.141859	0.121227	0.326129	0.265041	0.210293	0	0.161262	0
AL391422.4	0.419237	0.400995	0.403465	0.167961	0.225504	1.08999	0.228942	0.290968	0.452031	0.252543	0.192968	0.556218	0.385506	0.365405	0.628948	0.251269	0.354855	0.41678	0.455893	0.333366	0.271567	0.323103	0.309974	0.473678	0.255783	0.176613	0.683914	0.756351	0.228303	0.263205	0.463794	0.248871	0.241185	0.649293	0.282034	0.375597	0.298428	0.229093	0.569105	0.286577	0.228998	1.73462	0.529408	1.59952	0.427368	0.61036	0.322325	0.715076	0.308963
AL158825.2	0.191959	0.227926	0.181851	0.166116	0.192265	0.140366	0.226427	0.0666139	0.14329	0.110713	0.16741	0.194247	0.176514	0.0342227	0	0.295844	0.365581	0.0636113	0.212682	0.127792	0.143474	0.156644	0.064951	0.300304	0.0632434	0.242601	0.0306341	0.160426	0.0762823	0.241031	0.206621	0.247552	0.0602362	0.117612	0.170916	0.140709	0.133673	0.0439101	0.0384463	0.084354	0.204039	0	0.0671273	0.30098	0.440285	0.27947	0	0.200915	0.520856
AC004982.1	0.116568	0.184544	0.220858	0.145707	0.246478	0.198887	0.366661	0.350578	0.159524	0.24203	0.25415	0.204458	0.200085	0.221672	0.221959	0.189632	0.161454	0.141636	0.0717506	0.194005	0.127783	0.137399	0.20159	0.121573	0.13655	0.196427	0.136419	0.129892	0.123527	0.117093	0.250942	0.200435	0.121928	0.238066	0.345964	0.182284	0.173169	0.248868	0.326851	0.179284	0.0929269	0.318003	0.203816	0.268063	0.356485	0.622264	0.293306	0.216899	0.234289
TRG-AS1	0.628012	0.35127	0.354015	0.435669	0.244326	0.278948	0.544868	0.864528	0.366119	0.262226	1.09313	0.378147	0.183267	1.14924	0.388122	0.515936	0.566115	1.25898	0.48304	0.699686	0.349132	0.436238	0.365277	0.292306	0.786587	0.364049	0.0894546	0.360639	0.69713	0.379288	0.0754192	0.275381	0.454397	0.367288	0.964912	0.721329	0.481417	0.552066	0.648653	0.249743	0.885443	0.216635	0.185128	0.26855	0.0238088	0.0226689	0.0195892	0.206428	0.375544
AL137003.1	0.515194	0.458792	0.493779	0.226572	0.541391	0.870791	0.288907	0.483593	0.907844	0.374104	0.541379	0.738415	0.801477	0.478821	1.01316	0.397003	0.886125	0.361041	1.31941	0.809653	0.393904	0.392844	0.394363	0.376564	0.339475	0.704481	1.78723	0.617106	0.456451	0.362686	0.777271	0.560148	0.286229	0.473483	0.667773	0.304592	0.486974	0.539015	0.811947	0.378563	0.383778	0.974621	1.0278	2.5505	0.852352	1.16198	0.286892	1.85637	0.580554
LINC02100	0	0.16041	0.0731333	0.701457	0.180416	0.197574	0.212473	0	0.504225	0.0623343	0.11782	0	0	0.385364	0	0	0	0.447685	0.0997877	0	0	0.146991	0	0	0.118692	0	0	0.193551	0.286326	0.271413	0.072708	0	0.0847863	0.165546	0	0.158445	0	0.185419	0	0.0593668	0	0.663398	0.377943	0.423648	0.413153	0.590058	0	0.565601	0.488759
AL596223.1	0.199606	0.256755	0.198099	1.62177	0.166603	0.42571	0.693259	0.219347	0.173831	0.944011	0.261119	0.605955	0.330382	1.07944	0.0691044	1.23906	0.483819	1.01423	0.319444	0.354354	0.636541	0.389111	0.990561	0.0910778	0.716083	1.15622	0.0530907	0.0635491	2.64403	0.952402	0.152187	2.40252	0.595039	0.234402	0.580568	0.399925	0.991517	0.814257	0.146585	1.18414	0.34477	0	0.0116335	0.146052	0.152608	0.0968675	0	0.0928526	0
AL355488.1	1.06049	1.41324	0.824481	0.501165	0.738251	0.676467	0.195177	0.360182	0.303172	0.681915	0.806801	0.840239	0.556051	1.05394	0.585872	0.620147	1.78919	0.65051	0.633319	1.03646	0.54641	0.398938	0.432627	0.803051	0.515416	1.5684	0.619347	0.68963	0.328772	0.538302	0.910764	0.606905	0.368181	1.37554	1.44649	0.337405	0.823331	0.929046	0.759213	0.599875	0.455686	0.350864	0.520766	2.34205	1.24207	6.86565	0.652905	2.48759	0.394551
AC138932.6	0.456884	0.406865	0.401908	0.263583	0.343207	0.208804	0	0.317096	0	0.105404	0.0996136	0.277398	0.168049	0.12218	0	0.176035	0.355958	0.113551	0.253103	0.266139	0.0341484	0.0932072	0.20612	0.580739	0.100351	0.360886	0.0729125	0.354557	0	0.28684	0.368835	0.336686	0.179211	0.209947	0.650879	0.167451	0.0954467	0.209022	0.183012	0.175675	0.242817	0.186961	0.0399425	0.644728	0	0.665169	0	0.796999	0.206616
AC099811.1	0	0.0637994	0.0116348	0.024799	0.0287026	0	0.0169013	0.0447506	0	0	0	0	0.0316215	0.015327	0.0223227	0	0.0148845	0	0.0317506	0.0286166	0.0128513	0	0.0193927	0.0672473	0.0188828	0	0.0411595	0.0102641	0	0	0.0578359	0.0158384	0	0.0131684	0.0153094	0	0.0119734	0.00983282	0	0.0188894	0.0114226	0	0.0300637	0	0	0.0938728	0	0.059988	0.025919
AC078883.2	0	0.136837	0	0.0332431	0.0769517	0.042135	0.0453124	0	0	0	0	0	0.127166	0	0	0	0.0399053	0.0381896	0	0.0383606	0	0	0	0.0901451	0.0759375	0	0	0.082554	0	0.028941	0.0310117	0.0849256	0	0.0706093	0.0410445	0.0337903	0.0642013	0	0	0.0506426	0.0612481	0	0	0.144557	0	0	0.434965	0	0.069489
RUSC1-AS1	1.20102	1.62873	0.91088	0.543405	1.38001	1.33739	0.273266	0.380813	0.423228	0.620258	0.630051	1.07344	0.672722	0.821694	0.379917	0.56845	1.27295	0.800027	0.53362	1.04104	0.355421	0.38307	0.474448	1.11589	0.494112	0.993935	0.630457	0.541532	0.373095	0.569535	1.56016	0.768243	0.556705	1.97224	2.35802	0.455823	0.72851	0.661025	0.578772	0.578674	0.782481	0.583775	1.30474	2.19666	2.01359	3.80774	4.76309	4.03278	1.35646
AC073333.1	0.0992382	0.29458	0.161164	0.0572519	0.198792	0.145132	0	0.0688754	0	0.137366	0.0432735	0.0803368	0.109504	0.0707691	0.051535	0.127453	0.343629	0.230199	0.0733008	0.231229	0.0593381	0.0269937	0.0223854	0.194062	0.108984	0.188128	0	0.0710882	0.0788721	0.0996856	0.267045	0.182826	0.124563	0.48642	0.176719	0.0581944	0.165853	0.113502	0.0795031	0.109022	0.210966	0.406092	0.312328	0.497918	0.151744	0.0722396	0.249702	0.138491	0.418864
AC007216.2	0	0.248552	0.0453274	0.144919	0.335462	0.122455	0	0.116227	0	0.154537	0.219072	0.0677842	0	0.119423	0	0.0860309	0.347925	0.110989	0.123695	0.111485	0	0	0.0755506	0.261984	0.0367822	0	0	0.0399871	0	0.0420549	0.225319	0.123408	0.210199	0.153906	0.178928	0.0491015	0.0932925	0.038307	0.134161	0.0735901	0.133502	0.137056	0.175685	0.157544	0	1.34095	0	0	0.100976
AC092123.1	0.328198	0.310535	0.48303	0.159758	0.4109	0.40498	0.290346	0.341675	0.0459352	0.241344	0.268337	0.174358	0.158441	0.329127	0.0639133	0.205486	0.447474	0.428235	0.113634	0.348219	0.220772	0.100432	0.194335	0.336944	0.108129	0.427745	0	0.396733	0.211936	0.16999	0.281509	0.249413	0.270342	0.282775	0.76708	0.126301	0.514225	0.337835	0.492995	0.189292	0.130819	0.15109	0.258231	0.540324	0.846864	0.582341	0.541937	0.515265	0.0742103
AL158163.2	0.428709	0.354506	0.323249	0.264995	0.276037	0.134351	0.0361205	0.350674	0.0342873	0.211936	0.600884	0.446214	0.405478	0.524096	0.620187	0.283165	0.349913	0.304426	0.848195	0.152894	0.357046	0.224896	0.103612	0.143717	0.322843	0.464409	0.0879637	0.263229	0.243377	0.299911	0.296649	0.338489	0.230619	0.394	0.850676	0.269357	0.153533	0.126085	0.294389	0.262401	0.268529	0.0751851	0.128501	0.316889	0	0.133746	0	0.256406	0
AL136115.2	0.036517	0.0325192	0.029652	0.0316007	0.07315	0.0801068	0.0430738	0.0760328	0	0	0.0477704	0.0443426	0.0402946	0.0781233	0	0.0844188	0.0758677	0.0726058	0.0404591	0	0	0.0297988	0.0741349	0.257075	0.0481239	0.138452	0.0699314	0.0261585	0	0.110045	0.117918	0.08073	0	0.0671209	0.0780334	0.0321209	0.0305148	0.100238	0.0438825	0.0481407	0.0291111	0	0.191547	0.27483	0	0	0	0.0764413	0.264224
AL121992.3	0.867331	1.21374	0.603667	0.64334	0.558456	0.271807	0.146152	0.515969	0.277469	0.771792	0.891485	0.752287	0.478527	0.331347	0.193033	0.477397	0.772272	0.677479	0.960961	0.804242	0.944607	0.252773	0.586937	0.872271	1.02055	1.29189	0.118641	0.843196	0.295428	0.886798	1.35035	1.30113	0.46657	0.683237	0.463352	0.65393	1.13892	1.06285	0.818928	1.34759	1.43225	0.456326	0.259973	1.51534	1.13677	1.7588	0.233825	2.20465	0.448264
AC005224.3	0.207607	0.115549	0.0842892	0.0561429	0.168949	0.0853923	0.0306106	0.0270165	0.0726426	0.0808232	0.118819	0.157561	0.057271	0.263713	0.141503	0.0599925	0.175226	0.296686	0.100633	0.194357	0.186204	0.12706	0.0614649	0.167467	0.179547	0.12299	0.0745455	0.0929482	0.113438	0.0879792	0.104749	0.100399	0	0.0953995	0.110909	0.216855	0.0867417	0.204799	0.109148	0.0769756	0.10344	0.127432	0.0680619	0.195309	0.29761	0	0	0.190132	0.891916
AC011773.1	0.0916045	0.040788	0	0.0792719	0.137625	0	0	0.047683	0	0	0	0	0.0505404	0	0	0	0	0.0455338	0	0.137213	0	0.0747517	0.0309951	0.0537404	0	0	0	0	0	0	0.0369755	0.101257	0.0862356	0.126282	0	0	0.0765477	0	0	0	0.0365133	0	0.432455	0.215445	0	0.300072	0	0	0.0828523
AL133520.1	0.612442	1.30894	0.770825	0.556489	1.31884	0.705341	0.433446	0.60571	0.37716	0.445067	0.440648	0.929612	0.844747	0.589607	0.811014	0.849494	0.795256	0.821949	1.4589	0.947945	0.878881	0.724664	0.683841	1.50903	0.726396	0.928817	0.733031	0.329037	0.462416	0.484472	0.865226	0.744676	0.663029	0.816142	0.687084	0.808071	1.12591	0.714481	0.809569	0.504618	1.14735	0.827036	1.18863	1.32517	2.52849	3.81177	0.462306	6.08964	0.553927
GLIDR	0.559329	0.439496	0.487574	0.32743	0.568457	0.640563	0.650058	0.762123	0.580226	0.301721	0.742458	0.459455	0.254137	0.448729	0.486953	0.316921	0.316149	0.359797	0.373648	0.689961	0.339361	0.4967	0.378507	0.299181	0.368556	0.436608	0.322916	0.282825	0.163434	0.514341	0.438257	0.309134	0.456857	0.521604	0.536098	0.441349	0.494887	0.496727	0.810529	0.292779	0.518024	0.262542	0.440088	0.116072	0.792378	0.305369	0.0931352	0.137747	0.0743954
AC010536.2	0.317093	1.18599	0.720947	0.109761	1.07983	0.347801	0	0	0.0710092	0	0.165925	0	0	0.474865	0.197602	0.244348	1.11995	0.126093	0	0.189987	0.227521	0.0517512	0.0858326	0.669688	0.0417881	0.120224	0	0.0454291	0.0504035	0.28667	0.15359	0.490709	0	0.641124	0.609838	0	0	0.261122	0.0762101	0	0.353898	0.311417	0.399189	1.78985	1.45459	0	0.478719	1.59305	0.458874
AL009179.1	0.147407	0.191435	0.159594	0.0744111	0.147642	0.0875781	0.108672	0.191825	0.151296	0.0722649	0.176764	0.111873	0.0338867	0.0985495	0.0765495	0.203516	0.242451	0.122119	0.09527	0.220799	0.13221	0.120288	0.124691	0.12251	0.109272	0.128078	0.0294053	0.048397	0.0585778	0.097172	0.104125	0.0950485	0.127204	0.19192	0.255934	0.0810386	0.0975161	0.181239	0.236186	0.0931157	0.117512	0.165881	0.573467	0.27735	0.0845247	0.49628	0.139089	0.102856	0.299977
SNHG16	1.97085	2.07904	2.35344	2.08259	1.60962	2.18364	2.55578	3.02148	2.82445	1.08458	2.58866	1.91748	2.01592	2.31772	2.65314	2.38435	2.43353	1.59764	2.08173	2.23154	1.48082	1.97363	2.25891	2.9128	1.78859	1.93251	2.40005	1.30011	0.867387	1.52094	3.25307	1.31242	2.09619	1.76352	1.96481	1.93051	2.04443	2.07947	3.37721	2.01847	1.88028	7.68537	6.52989	4.24223	4.32786	2.21747	2.98748	6.80346	3.76757
AC156455.1	0.199018	0.615094	0.380245	0.243141	0.316591	1.24555	0.731878	0.68251	1.54677	0.105332	0.428812	1.13726	0.994688	0.438297	1.36789	0.14434	0.40132	0.232767	0.933895	0.187047	0.262501	0.334362	0.324814	0.233511	0.161994	0.332898	1.49088	0.360604	0.362872	0.211675	0.963987	0.232931	0.231437	0.462643	0.537859	0.535478	0.303264	0.305285	0.422048	0.177484	0.401307	0.431154	0.45442	2.73134	2.41664	0.485753	2.16508	0.0245063	0.974136
AC092119.2	0.948853	0.844975	0.723779	0.373232	0.417583	0.614985	0.186538	0.269404	0.193168	0.298502	0.394947	0.55864	0.301412	0.492109	0.44795	0.465294	0.955801	0.3716	0.286714	0.947514	0.361043	0.234633	0.301594	0.3711	0.577858	0.981145	0.344146	0.329551	0.182818	0.487396	0.208908	0.397288	0.216543	0.396378	0.798756	0.252917	0.61269	0.601813	0.742882	0.388532	0.297984	0.141193	0.542961	1.28487	3.16556	1.38142	1.41079	1.6552	0.260059
AL138963.1	0	0.246307	0.22459	0	0.0692566	0	0	0.143972	0	0.0478566	0	0	0.152599	0.221895	0	0.159851	0.359148	0	0.0766112	0.138098	0.0620178	0.0564255	0.0467926	0.243392	0	0.131083	0.0662092	0.19813	0	0.156281	0	0.076433	0.065094	0.127097	0.22164	0	0	0.332159	0	0.0911567	0.110247	0.339545	0	0.455354	0.317195	0	0	0.578981	0.12508
AC090589.3	0.634848	1.62953	0.879383	0.45243	1.27171	0.983053	0.176197	0.505406	0.250883	0.491072	0.390819	1.04298	0.700522	0.519302	0.581789	0.604315	1.51293	0.631127	0.744757	1.19332	0.703373	0.457105	0.480154	1.0954	0.541352	0.849528	0.715152	0.56177	0.415521	0.647088	0.572798	0.9907	0.738261	1.20122	2.15462	0.229939	0.5305	0.435659	0.807774	0.590772	0.565638	1.10027	0.66601	2.14304	0.856536	3.66987	1.40947	2.73604	0.33776
AP000487.1	0.125354	0.161244	0.192266	0.0723182	0.125553	0.137493	0.147862	0.0942506	0.16375	0.0578384	0.0728817	0.186043	0.138321	0.0968419	0.0759464	0.101963	0.180858	0.103849	0.0694429	0.166902	0.0437228	0.0511459	0.0989669	0.196105	0.0871874	0.105616	0.15337	0.0997728	0.0553488	0.120672	0.146172	0.0769793	0.124563	0.224009	0.18602	0.110263	0.162944	0.143371	0.175744	0.11017	0.138793	0.239381	0.284931	0.406196	0.383354	0.136875	0.210275	0.14578	0.151169
N4BP2L2-IT2	0.276162	0.538701	0.234924	0.132768	0.219525	0.307715	0.0879005	0.196232	0.13743	0.175964	0.33833	0.34599	0.207991	0.225072	0.136584	0.189163	0.632952	0.174313	0.213697	0.341433	0.161196	0.139506	0.154253	0.324025	0.248404	0.415498	0.277023	0.248067	0.0975498	0.158518	0.261868	0.285882	0.173318	0.551922	0.63697	0.0925398	0.227107	0.333906	0.316061	0.219596	0.174726	0.182966	0.183948	0.91962	0.744013	1.81884	0.24817	1.11031	0.301318
AC004918.1	1.69813	1.83451	1.67276	0.722713	1.44989	1.52671	0.72241	1.15925	0.623406	1.25235	1.82086	1.41977	0.95226	1.34002	0.910765	1.33002	1.79294	0.857927	1.2029	1.55674	0.749047	0.817803	0.847737	1.07788	1.08226	1.31934	0.959604	0.897373	0.774381	0.901831	1.3484	1.23087	1.10068	1.6374	2.32002	0.73461	1.09334	1.08891	2.10756	0.880787	0.998663	1.2303	1.08058	2.38321	2.04323	4.25557	0.630417	12.0627	1.15821
AP4B1-AS1	0.321408	0.561434	0.311175	0.160464	0.297156	0.298299	0.116652	0.154434	0.193781	0.11978	0.177886	0.300221	0.0954846	0.185126	0.173329	0.219096	0.346721	0.233498	0.178053	0.345643	0.188486	0.0706132	0.167309	0.725216	0.138474	0.281216	0.082857	0.115118	0.0491245	0.186264	0.249488	0.409935	0.186197	0.363552	0.779276	0.141358	0.309899	0.288429	0.326815	0.228155	0.22666	0.060703	0.28531	1.01177	0.283536	0.539922	0.373257	0.388158	0.134169
AL442067.2	0.0590509	0.0525861	0.0479496	0.0511009	0.0591447	0.0647696	0	0.122951	0.0661188	0.122608	0	0.0717056	0.195478	0.0631658	0.0919964	0	0.245368	0.117409	0	0.117935	0.158889	0.048187	0	0.13857	0.0778202	0.111944	0.0565423	0.0423004	0.140796	0.0889756	0.0953417	0	0.0555899	0.10854	0.0630931	0.103884	0	0	0.0709614	0	0.047075	0	0.309747	0.388869	0	0	0	0	0.213636
LINC02257	0	0	0	0	0	0	0	0	0	0	0	0	0	0	0.0334616	0	0	0.0213525	0	0	0	0	0	0	0	0	0	0	0	0	0.0173392	0	0	0	0	0.0188928	0	0	0	0.0141576	0	0.474615	0.518252	0.161649	0.0985274	0.046905	0.405328	0	1.32099
KCNIP2-AS1	0.201745	0.247031	0.143341	0.0872924	0.0757748	0.0829812	0.23797	0.105015	0.197656	0.104722	0.197938	0.153113	0.139135	0.134878	0.196439	0.174896	0.130983	0.125352	0.139703	0.176278	0.0904731	0.0617361	0.0682622	0.118355	0.0997014	0.0956135	0.217322	0.0903238	0.0400856	0.0759956	0.101791	0.0557512	0.166181	0.417176	0.188611	0.133094	0.147512	0.207669	0.181828	0.0664908	0.140727	0.371503	0.396841	0.379589	0.462731	0.27536	0.0951806	0.263947	0.36494
AC104785.1	0.401004	0.162319	0.177609	0.126188	0.109538	0.0799706	0.129002	0.151807	0.0408182	0.201844	0.286135	0.0442672	0.040226	0.155981	0.227175	0.140459	0.113608	0.0724823	0.161561	0.10921	0.130786	0.237985	0.0740088	0.171092	0.144126	0.138217	0	0.339482	0.0579469	0.219715	0.0588589	0.0402963	0.240228	0.20102	0.194752	0.0320663	0.21324	0.225151	0.262847	0.144176	0.116246	0.626542	0.229466	0.240067	0.668914	0.716499	0	0.0763113	0.659437
OGFRP1	0.502278	0.381512	0.371866	0.396305	0.340317	0.534717	0.697018	0.353728	0.496233	0.16359	0.309207	0.322898	0.277119	0.442465	0.368239	0.421202	0.368306	0.484647	0.147309	0.693346	0.410745	0.229046	0.329903	0.467997	0.525648	0.392075	0.0848719	0.338636	0.270046	0.478573	0.441259	0.244944	0.375491	0.638111	0.568229	0.402829	0.506133	0.334546	0.497072	0.486881	0.388636	0.943052	0.340957	0.583706	1.49088	0.645227	0.780599	1.26789	0.614626
AL139147.1	0	0	0	0	0	0	0	0	0	0	0	0.0450331	0	0.0198349	0	0	0.0192623	0	0	0	0	0	0	0.0217565	0	0	0.0355101	0	0	0	0.0149693	0.0204968	0	0.0511245	0.0198121	0	0	0.0127248	0.0222829	0	0	0	0.0778119	0.0872217	0	0	0	0.0388158	0
JARID2-AS1	0.0942218	0.12586	0.0765087	0.0407684	0.235929	0	0.05557	0.0490454	0.0527497	0.0652112	0	0.228827	0.0519844	0.251969	0	0.217819	0.195755	0.0936695	0.104393	0.141133	0.0845078	0.230662	0.0956421	0.221103	0.0620851	0.0893093	0	0.168737	0.411868	0.14197	0.19016	0.10415	0.0886995	0.12989	0.0503358	0.0828791	0	0.0646589	0.16984	0.155267	0.225339	0.115669	0.0494234	0.0443201	0.648332	0.308646	0	0.0986177	0.170439
AC108134.3	0.695117	0.547038	0.577565	0.153881	0.728604	0.815627	0.476703	0.319756	0.325807	0.212576	0.444092	0.333707	0.338918	0.69168	0.352584	0.224225	0.419819	0.449981	0.447765	0.371282	0.159488	0.395744	0.185971	0.265541	0.394119	0.214517	0.356012	0.509519	0.154175	0.219218	0.300154	0.446724	0.197835	0.371418	0.846333	0.398145	0.310694	0.499204	0.699339	0.298356	0.386612	0.436595	2.84911	0.364989	7.11894	6.7781	0.0610132	33.8394	0.175452
CASC19	0	0.156039	0.0948541	0.0505439	0.117	0.192191	0.0688946	0	0.0653981	0.0404238	0.0764067	0.141848	0.451145	0.0624773	0.181987	0.045008	0.303368	0	0	0.174974	0	0.142985	0.0395251	0.13706	0	0	0	0.0418393	0.0464206	0.0880058	1.08448	0.129124	0	0.161035	0.249622	0.154128	0.146421	0.120244	0.210564	0	0.23281	0.717024	3.24753	5.93431	2.14344	4.84694	5.95203	0.489058	0.422614
AC048344.4	0	0.0362216	0.0990838	0.0703971	0.0814783	0.0446136	0.239889	0.127034	0.227715	0.0844529	0.0532092	0	0	0.0435089	0.0633676	0	0.0845054	0.0808721	0.0901308	0.203085	0.0729622	0.0995743	0.0275251	0.238619	0	0.154215	0.0389466	0	0	0.0919302	0.0656718	0	0	0.0373814	0.130376	0	0.101967	0.0279125	0.0977571	0.0268108	0.194553	0.0998663	0.128013	0.267855	0.37317	0.355303	0	0.425721	0.735766
AC005479.2	0.198937	0.177158	0.0403845	0	0	0.0545507	0.0586643	0	0	0	0	0.301962	0.0548791	0.1596	0	0.114974	0	0.0494427	0.385722	0	0.0446068	0.0405844	0.16828	0.116708	0.0983135	0.0942825	0.0476215	0.0712531	0.0790551	0	0.240898	0.054975	0.0936387	0.228538	0	0.0437471	0	0.170648	0	0.0983477	0.0792957	0.12211	0.521755	0.280728	0	1.73777	0	0.208218	0.719719
NCBP2-AS1	0.381414	0.407589	0.216797	0.0330064	0.420222	0.125505	0	0.198538	0.0427066	0.211182	0.199582	0.324206	0.168348	0.244795	0.178264	0.264522	0.475456	0.227507	0	0.3047	0.273673	0.0933731	0.0774327	0.537021	0.100529	0.144611	0.109563	0.327866	0.0909415	0.143675	0.246328	0.252963	0.107718	0.385587	0.733542	0.0335498	0.223105	0.31409	0.458345	0.150846	0.152031	0.0936469	1.00034	0.968813	0.69986	0.583058	1.15165	0.319367	0.206983
MIR100HG	0.45178	1.78899	0.880435	0.255426	0.461548	3.87837	2.4016	3.20766	7.42257	0.485694	0.618586	3.44154	2.44605	0.289957	3.6271	0.394555	1.57062	0.491051	3.85758	0.448135	0.723963	0.892168	0.96202	1.02835	0.523933	0.610935	5.37851	1.36355	0.667858	0.71703	2.07888	0.609252	0.306217	1.25945	0.537413	1.07826	0.226513	0.431975	1.18715	0.397058	0.427386	0.746885	1.32708	1.17305	0.483569	0.388066	0.0909411	0.926801	1.13867
SCAT2	0.262475	0.363596	0.094725	0.302851	0.233682	0.223918	0.275204	0.0303614	0.0653091	0.18166	0.152605	0.212483	0.160904	0.218373	0.136305	0.112367	0.242364	0.115972	0.161561	0.232982	0.104629	0	0.118414	0.307965	0.269036	0.221147	0.1117	0.208912	0.0695362	0.153801	0.235436	0.257896	0.192182	0.348435	0.373923	0.102612	0.170592	0.120081	0.140185	0.134565	0.116246	0.214814	0.458931	0.795652	0.535131	3.18444	0	0.061049	0.633059
AC127024.3	0	0	0	0	0	0.102223	0	0	0	0	0	0.11317	0	0.0498461	0.0725972	0	0.0968138	0.0463257	0	0	0.0417946	0	0	0.054675	0	0	0	0.0667611	0	0	0.150474	0.154528	0	0.128478	0.149366	0.0409891	0	0	0	0.0307158	0.0371483	0	0.146658	0.26303	0	0.101764	0	0.0975457	0
TSC22D1-AS1	0.496048	0.358915	0.367549	0.134145	0.335365	0.333253	0.124337	0.271118	0.118027	0.150201	0.267677	0.263529	0.287365	0.232144	0.16422	0.234128	0.276971	0.326705	0.116789	0.414854	0.177963	0.293471	0.260155	0.283734	0.273744	0.246847	0.195927	0.204319	0.147842	0.224228	0.240271	0.178204	0.180953	0.501475	0.675755	0.1309	0.29016	0.306368	0.461978	0.318798	0.222439	0.334929	0.234179	0.694161	0.682652	0.988493	0.42125	0.259595	0.12338
AC016747.1	0.586045	0.515747	0.548652	0.357986	0.379808	1.20998	0.691273	0.674709	0.926386	0.348342	0.505085	0.694891	0.601023	0.958763	0.934493	0.329402	0.508514	0.58261	0.748616	0.915694	0.327743	0.388209	0.377923	0.299314	0.595141	0.274477	1.28074	0.246945	0.383579	0.410349	0.311693	0.480134	0.447848	0.716018	0.559863	0.69137	0.345683	0.449482	0.662824	0.522634	0.225351	0.440131	0.47015	0.265935	0.41116	0.120453	0.312268	0.27422	0.324267
AC007014.2	0.0447504	0	0.0363376	0.0387257	0	0	0	0.046588	0	0.0309719	0.0585412	0	0.148139	0	0	0.0689684	0	0.0889762	0.0495813	0	0.12041	0	0	0.157519	0.0589744	0.169669	0.128548	0	0.0711331	0.269713	0.108379	0.0494661	0.0421276	0.123382	0.0478138	0.0787265	0.0373949	0.0614192	0	0.0884924	0.107024	0	0.422523	0.294696	0.205283	0.488635	0.168901	0.0936765	0.323798
VIPR1-AS1	0.734176	0.58034	0.609552	0.285544	1.11541	0.149293	0.209203	0.180346	0.0738922	0.545236	0.60971	0.385654	0.291281	0.410316	0.192773	0.346441	1.07972	0.369036	0.29704	0.926721	0.314445	0.272627	0.371226	0.246811	0.356031	0.727174	0.102684	0.360461	0.242581	0.435034	0.526095	1.05318	0.434878	0.735385	1.89939	0.152378	0.451509	0.61987	0.738521	0.337124	0.489926	0.192411	0.203371	1.12527	0.208127	0.243199	0.840637	0.846135	0.0671491
NNT-AS1	1.32913	1.4012	1.4443	0.831632	1.23009	1.95452	1.28727	2.21122	1.90769	0.680902	1.67054	1.64166	1.614	1.02101	2.18233	1.24763	1.89169	0.922993	1.81189	1.83148	1.27099	1.1803	1.05596	1.14286	1.10119	1.25366	2.13359	1.00578	0.717185	1.04552	1.62789	0.72019	0.870954	1.69456	1.32613	1.00579	0.857497	1.38604	2.44671	1.05003	1.16345	2.88743	2.22484	2.50692	1.49438	1.78566	0.270498	1.31613	1.74428
AC011978.2	0.208719	0.306684	0.288118	0.261898	0.146336	0.137359	0.135408	0.260748	0.0934805	0.245574	0.163824	0.266121	0.161218	0.256753	0.227617	0.337757	0.216818	0.280119	0.497189	0.208425	0.299521	0.281028	0.303674	0.293871	0.364455	0.435242	0.18986	0.291551	0.240533	0.369526	0.143221	0.322998	0.235784	0.326095	0.267608	0.183593	0.261619	0.17904	0.250818	0.275157	0.299502	0.102492	0.372239	0.157084	0.335108	0.683708	0.0393883	0.65537	0.264288
AL357140.2	1.07177	0.911055	0.712052	1.72849	1.36624	0.961828	3.85011	1.31865	0.709124	1.07895	1.08341	0.650728	0.645079	1.30279	0.986662	1.76442	0.657894	1.21078	0.701689	0.53513	0.830194	1.19263	1.51651	0.971723	1.47664	1.57002	0.233237	2.51264	2.94265	2.45906	0.589927	1.50781	1.37585	0.940227	1.24924	1.24272	2.52399	1.93903	0.643975	1.41293	1.24278	0.358838	0.153325	0.824959	0.223478	0.851113	0.367743	0.305939	0.969372
AL020997.2	0	0.518716	0	0	0.466729	0	0	0.121281	0	0	0.152398	0.141463	0	0	0.181493	0	0	0	0	0.232665	0	0	0.0788354	0	0.0767629	0	0	0.166903	0.092589	0	0.282139	0	0.219338	0	0.248944	0	0.292046	0	0.139995	0	0	0	0.122215	0.328788	0	0	0	0	0
AC025178.2	0.205616	0.25177	0.146091	0.0667253	0.154457	0.169146	0.121268	0.107029	0.143892	0.160096	0.403471	0.24968	0.170165	0.219944	0.0400416	0.0792227	0.266993	0.229962	0.0569531	0.17966	0.115261	0.083894	0.0695718	0.0603129	0.0677428	0.24362	0.0738305	0.220936	0.0408546	0.0774535	0.0829953	0.170462	0.21776	0.307074	0.302075	0.0904316	0.0214774	0.141102	0.0308861	0.118591	0.143426	0.063105	0.0808908	0.314333	0.235804	0.224514	0	0.376615	0.0464926
AC245884.8	0.706396	0.563986	0.454922	0.0843165	0.463547	0.614501	0.0861966	0.126793	0.027274	0.151727	0.31865	0.650728	0.107513	0.57323	0.227691	0.300326	0.556679	0.363235	0.40482	0.437834	0.436944	0.13914	0.313192	0.400121	0.36916	0.831186	0.256561	0.244285	0.271033	0.110107	0.393284	0.323103	0.229308	0.559659	1.14514	0.128557	0.590287	0.484758	0.468346	0.24084	0.155348	0.418644	0.43442	1.07703	3.24043	1.22348	2.29839	2.14157	0.220312
AC026470.2	0.0978788	0.130745	0.0794782	0	0.147052	0	0	0	0.0547971	0.169356	0.0640211	0	0.162006	0.209399	0	0.0377122	0	0.145957	0	0.0977407	0	0.0798717	0	0.172264	0	0	0.0937209	0	0.0777917	0.14748	0.276556	0.108193	0.0460711	0.134931	0.209158	0	0.0408954	0	0.0588105	0	0.0390142	0	0.0513417	0.184161	0	0.320625	0	0.102445	0.708217
LINC00987	0.676362	0.301158	0.345016	0.202605	0.312663	0.827462	0.378447	0.460396	0.436914	0.240058	0.306276	0.610716	0.468848	0.473054	0.445803	0.340783	0.432372	0.396542	0.509192	0.528203	0.311093	0.233508	0.32274	0.284876	0.468527	0.328768	0.340421	0.23604	0.151618	0.261312	0.301009	0.153361	0.253055	0.557848	0.481774	0.465273	0.282595	0.422493	0.604378	0.320081	0.248858	0.319354	0.400265	0.122364	0.198888	0.113619	0.0981838	0.74422	0.0941138
TPT1-AS1	0.861375	0.895531	0.79984	0.367355	0.885448	0.734588	0.408361	0.667195	0.532999	0.561931	0.636198	0.608064	0.709451	0.575324	0.597137	0.581193	0.794186	0.514205	0.748877	0.742865	0.632103	0.598646	0.514575	0.739862	0.627327	0.773493	0.7794	0.950649	0.509355	0.552689	0.672085	0.797249	0.760452	0.804893	1.03703	0.375215	0.85583	0.766464	0.931108	0.544688	0.565117	1.20418	0.72206	4.26112	1.67318	1.27806	0.816657	1.61332	0.492048
AL121895.1	0.0376193	0.0737018	0.0183282	0.0455765	0.0376791	0.016505	0	0.0078328	0.0084244	0.0156218	0.00984248	0	0.0415109	0.0321926	0.0351647	0.0347868	0.0625263	0.0448785	0.0333443	0.0225397	0.0134963	0.018419	0.0254576	0.0441391	0.0446189	0.0285263	0.0216127	0	0.0239191	0.017005	0.0242956	0.0249501	0.0212487	0.0622323	0.0160778	0.0198543	0.0314359	0.0722845	0.0632899	0.0347157	0.0239919	0.036946	0.0552522	0.0566252	0.310626	0.164308	0.113589	0.314995	0.02722
AC023908.3	0.168839	0.306974	0.194222	0.0608783	0.169107	0.200622	0.074683	0.102533	0.0787696	0.0779025	0.138044	0.256276	0.0853895	0.195654	0.0986388	0.151789	0.2777	0.139874	0.0779438	0.273975	0.0757159	0.0975918	0.109495	0.0577793	0.0695325	0.293399	0.0471526	0.0856698	0.0615031	0.0741998	0.102226	0.147749	0.0397358	0.129307	0.202946	0.0990088	0.246902	0.164141	0.278978	0.0881052	0.0729068	0.138181	0.140225	0.205164	0.387255	0.368713	0.371726	0.220894	0.0381768
AC007497.1	0	0.136105	0.0310262	0.0330653	0	0	0.0901402	0	0.0427827	0	0	0.185591	0.042162	0.040872	0.119054	0.0588875	0.158768	0.0759708	0.0423342	0.114466	0	0.0935395	0.0775707	0.0896631	0	0.0724345	0.0365862	0	0.0303679	0.0287862	0	0	0	0.0702317	0.040825	0.0336096	0.031929	0.0524417	0	0	0.0913809	0	0	0.143784	0.175277	0.750982	0	0.559888	0
MIR181A2HG	0.129519	0.17301	0.0788779	0.0840618	0.0648626	0.106547	0.229163	0.235966	0.253788	0.0448204	0.25415	0.196595	0.214377	0.138545	0.353116	0.149709	0.168181	0	0.287002	0.291007	0.0290416	0.132114	0.0657359	0.0759833	0.106679	0.0613833	0.124017	0.0695848	0.0772041	0.0487887	0.104559	0.143168	0.121928	0.208308	0.103789	0.170891	0.081173	0.177763	0.116733	0.06403	0.0516261	0.0795008	0.0339692	0.639696	0.891212	0.989966	0.244421	0.542248	0.820012
AL031717.1	0.189694	0.574352	0.246453	0.0656624	0.341993	0.41613	0.0895021	0.0394967	0.12744	0.131288	0.0496305	0.230346	0.125591	0.284078	0.0591057	0.0584706	0.275877	0.113149	0.0840689	0.303083	0.102083	0.0309591	0.128369	0.356113	0.149993	0.143843	0.326945	0.19024	0.0904586	0.0285824	0.24502	0.25162	0.107146	0.104602	0.405359	0.100115	0.0951089	0.286387	0.319138	0.125038	0.0604893	0	0.437812	1.07074	0.522108	0.0828517	0.71596	0.635342	0.274512
FAM111A-DT	1.06164	1.06811	0.783093	0.582087	0.933458	1.39557	0.707388	1.18961	1.20686	0.605762	1.36761	0.865997	0.634917	1.00559	0.732285	0.749396	0.951301	0.982909	0.906879	1.24628	0.603297	0.6018	0.603262	0.532487	0.667503	0.583803	0.946705	0.423787	0.534601	0.647184	0.634608	0.57332	0.5493	0.811833	0.95248	0.605926	0.751702	1.05666	1.26604	0.731838	0.639597	1.13417	1.64088	1.89077	0.780695	0.920296	0.642334	1.42502	1.86178
AC003956.1	0.120424	0.482581	0.537817	0	0.844308	0.396259	0	0.188053	0.0674189	0.29171	0.157535	0.292462	0.0664407	0.128816	0.281416	0	0.125097	0.059859	0.266848	0.240508	0.0540043	0.196538	0	0.211942	0.119026	0.228291	0.345925	0.301925	0.09571	0.136088	0.486082	0.266227	0.056683	0.0553371	1.02934	0.105927	0.150945	0.289239	0.0723567	0.158756	0.72001	0.443507	0.379005	0.566451	0	0.131492	1.13628	0.756253	0
AL139011.1	0.808159	0.479789	0.406238	0.199817	0.732354	0.59095	0.136181	0.60096	0.4309	0.292982	0.45309	0.467309	0.382183	0.329324	0.359727	0.266897	0.479724	0.306065	0.383744	0.922307	0.310646	0.282634	0.494809	0.361228	0.329653	0.510683	0.626432	0.441078	0.275274	0.434894	0.46601	0.297773	0.217369	0.565888	0.65789	0.270808	0.321583	0.343319	0.739935	0.355135	0.429507	0.37795	0.524846	1.08612	0.176536	0.588292	1.01674	0.886143	0.278455
AC004943.1	0.0631569	0.134982	0.184622	0.0109308	0.0759088	0.0831279	0.0148994	0.0394502	0.0282865	0.0174844	0.033048	0.0613533	0.111505	0.121604	0.137751	0.116803	0.314916	0.075344	0.0699748	0.126136	0.0226583	0.0412302	0.0512872	0.133385	0.0915545	0.143674	0.108853	0.0995318	0	0.123711	0.101971	0.111699	0.0475643	0.104478	0.175449	0.0555539	0.168883	0.0866818	0.151791	0.133217	0.130906	0.0310133	0.18552	0.178247	0.289718	0.358601	0.143023	0.290855	0.0456981
AC009121.3	0.0587273	0.104596	0.127165	0.0677612	0.117641	0.107358	0.0461814	0.0611387	0.0657565	0.0135485	0	0.142625	0	0.0628197	0.0914923	0.0452546	0.203353	0.116766	0.086756	0.234578	0.0351151	0.0159743	0.0662362	0.0229685	0.0257979	0.111331	0.0187442	0.0280457	0.0777917	0.029496	0.0632128	0	0.110571	0.341826	0.125495	0.0516575	0.130865	0.0940359	0.0940968	0.0387104	0.0624228	0.384508	0.205367	0.349906	0.897994	0.89775	0.221653	0.122934	0.0708217
AC105036.3	0.176182	0.174327	0.222539	0.152463	0.235283	0.150301	0.207816	0.183416	0.350701	0.243872	0.358518	0.118855	0.280811	0.209399	0.304974	0.362037	0.162683	0.252993	0.195201	0.136837	0.14046	0.255589	0.291439	0.0689054	0.180586	0.0742205	0.149953	0.19632	0.202258	0.103236	0.331867	0.15147	0.110571	0.21589	0.188242	0.103315	0.147223	0.228373	0.399911	0.129035	0.21848	0.288381	0.287513	0.110497	0	0.21375	0.517191	0.245869	0.495752
AL139099.3	0.21382	0.571235	0.173623	0.0925168	0.32124	0.175895	0.18916	0.1113	0.119706	0.0369964	0.209785	0.519284	0.0589848	0.2859	0.416393	0	0.499762	0.159425	0.177677	0.0533796	0.335608	0.0436207	0.0361739	0.125439	0.176114	0.101336	0	0.153168	0.0424847	0.120816	0.0863068	0.118176	0.100644	0.294763	0.3998	0.14106	0.268012	0.110049	0.192711	0.0704703	0.127842	0.131246	0.224316	0.201154	0.245213	0.466945	0.403509	0.447591	0
CASC9	1.55709	4.06916	2.96594	3.58903	1.71989	1.0375	3.79351	1.99977	2.08564	0.765446	0.571105	1.07792	0.690478	1.5255	1.63233	1.51386	0.650026	1.6637	0.951268	1.7874	1.61844	1.40125	3.17097	1.22935	1.31367	2.84147	0.37622	0.813098	2.6023	3.43154	1.52721	1.14209	1.23294	2.43408	3.06304	3.82732	2.20102	1.58783	1.17166	2.46519	0.997683	1.96512	3.66397	6.10583	3.33776	0.762709	1.26326	0.243699	2.44811
AC123023.1	0	0.0687883	0.0313617	0	0	0.0847256	0	0.0402084	0	0.0267307	0	0.0937987	0	0	0	0.0297621	0	0.038396	0	0	0	0	0.0261364	0	0.0508986	0	0	0	0	0	0.0935379	0.0426923	0.0363588	0.0354955	0.0412663	0.101919	0	0	0.0464126	0	0.0307896	1.61208	0.526737	4.03313	0.708687	1.5182	0	1.61697	0.209594
TBL1XR1-AS1	0	0.022326	0	0	0.0502211	0	0	0	0	0	0.0327968	0	0	0	0	0	0	0	0	0.100141	0	0	0	0	0	0.0475272	0	0.0179591	0.0199256	0	0.0404784	0.0277126	0.0236013	0	0	0	0.0418998	0.0172045	0	0	0	0.061555	0.0263013	0	0	0.16425	0	0	0
AC125257.1	2.43618	2.59294	3.18412	2.27914	2.12497	2.52767	1.35483	2.14778	1.39256	2.13166	2.38303	2.87831	1.96166	2.32422	2.88357	2.70601	2.6371	2.53827	3.06392	2.22088	2.67714	2.11335	2.50508	2.30045	3.00324	2.85698	1.94741	2.21155	2.15716	2.92116	1.63005	2.24004	2.15565	1.9431	2.7202	2.58693	3.2462	2.43994	2.40886	2.56546	2.40868	4.92167	4.39008	2.52587	4.66482	3.16335	0.607466	6.11042	6.12722
AC020900.1	0.189694	0.135142	0	0.0328312	0.0379992	0.041613	0.044751	0	0	0	0	0	0.0418635	0.0405826	0	0.0292353	0.157644	0.0754329	0	0	0	0	0.0256738	0.178057	0.0249989	0	0.0363272	0.0271771	0	0.0285824	0.0612549	0.12581	0.0714306	0.104602	0.20268	0	0.0634059	0.0520704	0.136773	0.0500152	0.0302447	0.0931496	0	0.178457	0	0.579962	0.143192	0	0.480397
WARS2-AS1	0.918326	1.17426	1.0548	0.448288	0.526715	0.723161	0.810099	0.772182	0.549275	0.564957	0.744412	0.657638	0.428714	0.646484	0.813163	0.743942	0.668586	0.522796	0.860929	1.05811	0.915166	0.637292	0.799381	0.538742	0.861116	1.10108	0.529844	0.387952	0.318145	0.724372	0.548092	0.668054	0.605891	0.699707	1.16569	0.4246	1.07565	1.18229	0.905479	0.812266	1.01053	0.32761	0.959286	1.26635	0.522076	1.33697	0.607294	1.44586	0.29106
AC064807.1	1.27257	1.3469	0.838524	0.776286	0.888034	1.17843	1.71023	1.66146	1.43656	0.505347	1.4737	0.848638	0.897775	1.41704	1.18628	1.14942	1.0944	1.10956	0.624073	1.52076	0.963616	0.851187	1.01646	0.83223	0.893512	0.771189	0.928863	0.582819	0.596895	0.958728	0.816807	0.749453	1.15871	1.36126	1.22594	0.77989	1.08955	1.00213	1.37883	0.687557	1.14753	1.05003	2.63724	1.364	2.39247	1.11618	0.669274	0.611382	0.924559
ALMS1-IT1	0.111908	0.181194	0.132174	0.0792343	0.101896	0.122745	0.0600008	0.0635471	0.0683468	0.0633697	0.0266172	0.111183	0.123485	0.217648	0.110946	0.156791	0.169091	0.141593	0.0676302	0.0914318	0.0729968	0.0996216	0.0619608	0.238733	0.0670354	0.154288	0.136378	0.138465	0.0646849	0.0459869	0.0739158	0.0674729	0.0383088	0.102848	0.0326096	0.0894874	0.0765114	0.125666	0.0733526	0.114	0.0486613	0.424633	0.160092	0.23927	0.186674	1.06642	0	0.532404	1.32501
MAGI2-AS3	0.508919	1.11659	0.7666	0.284029	0.522656	1.7454	0.848248	0.934857	1.81892	0.362434	0.593389	1.15984	1.6379	0.317557	1.91894	0.399272	0.951982	0.438111	1.60781	0.627886	0.52095	0.547703	0.515343	0.86972	0.47142	0.552296	2.37294	0.665715	0.369305	0.443144	1.39032	0.560509	0.197886	1.19132	0.866859	0.627689	0.355932	0.454267	0.997123	0.454568	0.370429	0.620236	0.729277	0.572445	0.262214	0.257713	0.0347972	0.59828	0.376908
AC068790.5	0.0603816	0.48394	0	0.104505	0.181433	0	0.0712235	0.0628609	0.135217	0.0835806	0	0.293286	0.133256	0	0.0940696	0.139588	0.188173	0.24011	0.1338	0.180889	0.108313	0.0492729	0.0408612	0.425079	0.0795739	0.343401	0	0.47579	0.0479898	0.0454903	0.292471	0.333722	0.113685	0.0554929	0.451605	0.159338	0.100914	0.0414363	0.362803	0.0796016	0.144408	0	0.253382	0.511242	0	1.31863	0	0.252794	0.327675
AL513327.1	0.293636	0.413629	0.407506	0.221764	0.331535	0.263514	0.113354	0.116719	0.173358	0.121936	0.216508	0.337114	0.382924	0.13135	0.207937	0.213931	0.52687	0.143304	0.254353	0.277228	0.134076	0.139412	0.209547	0.68279	0.119609	0.576896	0.270938	0.149152	0.0891068	0.164909	0.413757	0.318677	0.110571	0.47594	0.889872	0.178453	0.298908	0.208833	0.230965	0.175956	0.170244	0.131082	0.537687	1.4465	0.269398	0.38475	0.241804	0.569968	0.183493
AC099811.5	0.0261727	0.0932296	0.0212524	0	0.0262143	0.0287074	0	0	0.0293054	0	0	0	0.0288802	0	0.0815499	0.0403369	0.0815648	0.0520386	0	0.0261358	0	0.0213576	0	0.122835	0	0	0.150365	0.037497	0	0	0.0633865	0	0	0.0240537	0	0.11511	0	0	0	0	0	0	0.0549149	0	0	0	0	0.273938	0.189377
AC040169.3	0.420303	0.155954	0.113763	0.212169	0.175405	0.115252	0.165257	0.218781	0.078435	0.121205	0.274914	0.127594	0.193243	0.37466	0.0545665	0.242911	0.145537	0.348199	0.0388063	0.0699517	0.0942428	0.142908	0.189617	0.328765	0.115395	0.199195	0.100612	0.17563	0.19486	0.131937	0.197927	0.116148	0.659449	0.225327	0.336806	0.308088	0.0878048	0.16825	0.0420899	0.0692612	0.251297	0.171992	0.257212	0.230653	0.482012	0.458934	0.26439	0.146637	0.633576
AC016394.3	0.602872	0.934554	0.525798	0.598998	0.49201	0.587784	0.553095	0.302191	0.775036	0.29362	0.408935	0.569387	0.344938	0.429922	0.417434	0.292505	0.811824	0.399559	0.544258	0.69121	0.320426	0.182207	0.256872	0.366778	0.220693	0.465618	0.213801	0.159948	0.177462	0.353261	0.793124	0.394904	0.273259	0.861875	1.002	0.726703	0.522438	0.520975	0.375652	0.279642	0.356005	0.274112	0.890136	1.11331	2.04855	1.56037	0.0842745	0.70111	0.646248
AC093484.4	1.19869	2.00934	1.37414	1.46444	2.25995	0.54138	1.66344	1.39473	0.868461	1.51284	0.645686	1.45558	1.01147	1.43307	1.20836	1.08671	1.75794	1.54216	1.3281	1.26741	0.758903	0.63293	0.858891	2.23376	0.929235	0.534681	0.270064	5.25304	1.06477	1.27493	1.36615	1.55883	0.464651	1.16645	2.78751	1.6126	1.23735	1.01614	1.10154	1.11547	1.5177	0.865617	2.21917	3.64839	2.26419	1.07789	1.86291	0.590408	2.04078
AL139089.1	0.615583	0.567768	0.535561	0.418556	0.462421	0.434056	0.544586	0.228878	0.393864	0.228239	0.431404	0.480538	0.242594	0.658479	0.205506	0.440478	0.433924	0.480837	0.219226	0.482989	0.295777	0.143523	0.267798	0.180568	0.362163	0.625165	0.273665	0.283478	0.244625	0.447205	0.230727	0.340225	0.144876	0.464718	0.634231	0.290077	0.569515	0.301741	0.871843	0.202882	0.262896	0.377853	0.92257	2.13032	2.9247	2.35256	0.912757	1.15054	0.516998
AC010463.3	0.214355	0.381775	0.0696229	0.0370993	0.429391	0.141068	0.202275	0.312419	0.192009	0.118684	0.112165	0.416466	0.283835	0.0917167	0.200368	0.132143	0.267206	0.127859	0.379991	0.128431	0.115353	0.174919	0.0870343	0.100602	0.169492	0	0.369448	0.0614202	0.170364	0.161491	0.034609	0.142166	0.121075	0.6304	0.229028	0.07542	0.214946	0.147099	0.463662	0.0847757	0.0683529	0.105259	0.944481	0.201657	0.196661	0.561735	0	0.628194	0.310199
AC024560.3	0.491357	0.546956	0.0997462	0.106302	0.492138	0.0673678	0.0724479	0.127883	0	0.170035	0.160695	0.223746	0	0.328498	0	0.141988	0.382817	0.122119	0.06805	0.490664	0.550875	0.10024	0.0831273	0.144129	0.121413	0.815044	0.235242	0.307981	0.244074	0.138817	0.148749	0.339459	0.17346	0.395129	0.524993	0.0540258	0.153973	0.0842974	0	0.202425	0.195854	0.301602	0.451041	1.27119	0.563498	0.402389	0.695445	1.15713	0
AF117829.1	0.206303	0.377642	0.172173	0.121499	0.169323	0.348852	0.263625	0.247587	0.359327	0.132867	0.138688	0.205283	0.316173	0.186964	0.299084	0.119231	0.282767	0.116789	0.358734	0.243208	0.133636	0.149643	0.17645	0.242058	0.0962896	0.244434	0.386848	0.0944168	0.0979233	0.0928231	0.395545	0.16153	0.129474	0.265967	0.244917	0.156264	0.153239	0.169102	0.282347	0.13032	0.084516	0.351755	0.15631	0.433989	0.302312	0.650764	0.227105	0.431856	0.321353
AC096992.2	0.789192	0.578104	0.640828	0.264365	0.573711	0.488656	0.40539	0.490308	0.285049	0.396437	0.599456	0.540986	0.463507	0.735259	0.575087	0.372733	0.489243	0.620059	0.606429	0.635546	0.627912	0.280452	0.318712	0.552594	0.410982	0.796306	0.390021	0.364728	0.263032	0.460306	0.380206	0.478387	0.443366	0.526425	0.870415	0.201538	0.478651	0.559046	0.489482	0.461467	0.345012	0.34378	0.480733	0.898114	0.58391	0.389167	0.0480425	0.746074	0.782865
AC073487.1	0.526769	0.324762	0.42774	0.175327	0.202926	0.444449	0.0477965	0.126554	0.0453707	0.168267	0.106016	0.44284	0.134137	0.173378	0.126256	0.218574	0.631394	0.161133	0.044895	0.0404635	0.10903	0.231462	0.137105	0.285261	0.186901	0.307265	0.155197	0.0870796	0.0644097	0.12211	0.392541	0.223953	0.152583	0.14896	0.692712	0.0356427	0.270883	0.139035	0.146081	0.240385	0.193817	0	0.212549	0.724286	0.557639	1.15037	0	1.61163	0.513089
LINC01806	0.793572	0.867306	0.724933	0.405797	0.98451	0.603362	1.61684	1.41761	1.53478	0.505545	1.69875	0.53657	0.427882	1.03215	0.646258	0.764398	0.843099	0.66341	0.73936	0.918524	0.630876	0.794752	0.683484	1.56595	0.570441	0.957342	0.077713	0.956056	0.680882	0.706564	1.092	0.837323	1.10361	0.646445	1.08877	0.793226	0.836454	1.15724	0.953636	0.42798	0.841112	0.110706	0.794683	0.95017	1.03419	0.512029	0.238252	0.792841	0.815626
AL645568.1	0.723282	0.677559	0.716975	0.349533	1.28893	0.247271	0.576155	0.948561	0.483809	0.741128	0.933889	0.49047	0.404235	0.442105	0.468287	0.412587	0.653769	0.382867	0.645253	1.05056	0.690839	0.72819	0.46403	0.484935	0.526105	0.516405	0.269827	0.100931	0.791348	0.643981	0.553563	1.17329	0.74279	0.543865	1.25454	0.355287	0.682892	0.554361	1.28682	0.563438	0.756315	0.115315	0.15767	0.3358	0.129269	0.164106	0.24817	0.0983152	0.118941
AC007285.2	0.0413812	0	0.0672036	0.10743	0.041447	0.0453887	0	0	0	0.200481	0	0	0.091324	0.0442648	0.193406	0.0318879	0.214934	0	0.0458484	0.123968	0	0.0675363	0.0840099	0	0.0818014	0	0	0.118572	0.0657775	0.124703	0	0.137225	0	0.114093	0	0	0	0.056795	0.0994556	0.136383	0	0.203203	0.347299	0.350369	0.189827	0	0	0.259871	0.074855
AL592435.1	0.100497	0.257956	0.206411	0.102315	0.153946	0.226943	0.160381	0.178476	0.205194	0.122743	0.154668	0.143569	0.143509	0.1075	0.147357	0.150329	0.12896	0.13517	0.176844	0.318776	0.111345	0.0964804	0.0680081	0.166468	0.175289	0.179308	0.0905675	0.131276	0.0563807	0.115796	0.190894	0.150294	0.105737	0.179288	0.252651	0.0831991	0.133378	0.154158	0.291263	0.101313	0.150806	0.0870869	0.117834	0.289193	0.189827	0.284017	0.0892482	0.519742	0.139016
AC021851.1	0.19811	0.176421	0.112606	0.0685753	0.15874	0.130377	0.280418	0.226869	0.177457	0.0548449	0.207329	0.240565	0.153023	0.14834	0.0308639	0.0763306	0.123478	0.216643	0.263395	0.237396	0.142148	0.0808313	0.067032	0.0464889	0.0783237	0.112668	0.170724	0.0993395	0.0787263	0.0298504	0.159931	0.0875942	0.0745994	0.109242	0.232838	0.209113	0.132438	0.0815706	0.142841	0.078351	0.126345	0.145923	0.270184	0.447297	0.181757	0.562427	0.224317	0.248823	0.179181
AC092338.1	0.202699	0.135381	0.205741	0	0.253777	0.0555824	0.0597738	0	0.0567402	0.140289	0.132583	0.123069	0.223668	0.271031	0	0.117149	0.0526411	0.151133	0.0561453	0.15181	0.0909009	0.082704	0.13717	0.23783	0	0	0.145566	0.108901	0.0402751	0.0381775	0.122727	0.616162	0	0.326005	0.379006	0.0891489	0.127037	0.173876	0.365376	0.0334026	0	0	0.106325	0.333711	0	0.553324	0	0.424312	0
AC124798.1	1.32345	1.8473	2.28816	1.51202	3.05325	1.41084	0.5876	0.967553	0.607729	1.38424	1.47841	1.1105	1.89519	1.57474	1.0425	1.59851	2.7805	1.50787	1.29333	1.87101	1.87387	2.60892	1.41384	4.80677	1.63143	2.53709	0.541065	2.35412	0.992754	1.41157	2.659	2.16149	1.21089	1.94745	3.04259	1.91624	2.03787	1.91336	1.63507	1.6369	2.5902	6.24325	6.82507	4.53255	6.58264	20.1176	4.57415	7.70418	2.663
AC004223.2	0.0394034	0.0701793	0	0.0340986	0.118398	0	0	0	0	0	0	0	0.0869592	0	0	0	0.0818646	0	0.0436571	0.0786956	0	0	0.0266649	0.092465	0.0778917	0	0	0.0282262	0.0626337	0	0.0318098	0	0	0.0362132	0	0	0.0329268	0	0	0.025973	0	0	0	0.0370692	0	0.0860501	0	0	0
ADD3-AS1	0.0856752	0.129279	0.13334	0.0700219	0.162088	0.0652585	0.143167	0.13379	0.0772768	0.0840028	0.15255	0.0577976	0.110294	0.086554	0.118644	0.0880272	0.133499	0.0544161	0.100198	0.123578	0.100322	0.12429	0.0660302	0.0809775	0.0878166	0.108278	0.0820357	0.150022	0.0529609	0.0932332	0.0634006	0.118379	0.109779	0.113734	0.147481	0.0544276	0.0894912	0.119221	0.120115	0.0643167	0.087272	0.186982	0.122338	0.125378	0.251093	0.337818	0.19761	0.189308	0.0387447
AC007637.1	1.64888	1.11176	1.47279	0.754216	1.86384	1.24016	0.50013	1.10352	0.975869	0.668415	0.67792	0.800896	1.24763	1.10866	1.3945	1.50658	1.46817	0.88986	0.887343	1.71712	1.18311	0.922649	1.17959	0.994964	0.884713	1.20568	1.44351	0.877431	0.992228	0.585625	1.4262	0.963392	0.997869	1.60198	1.3339	0.310796	1.10229	1.32551	1.41533	1.00924	1.03281	0.231339	0.172982	0.864243	0.324166	0.205764	0.0889049	0.690324	0
AC090152.1	1.94309	2.22319	2.18695	1.17066	1.79837	2.22569	3.85865	3.13674	3.73167	1.28524	2.60624	2.41923	2.57834	1.68384	3.08465	1.82901	1.71188	1.94392	3.37915	2.51754	1.64349	1.94689	1.61452	2.27985	1.83949	2.42462	2.87325	1.18048	1.42703	1.66772	2.96847	1.54971	1.49346	1.81968	2.78565	2.31496	3.02133	1.66256	2.79314	1.57262	1.84314	0.483117	0.322542	0.555337	0.282072	1.20855	0.464162	0.180205	1.20129
AL645941.1	0.0634185	0.39533	0.154489	0.164642	0.190558	0.208681	0	0	0.0710092	0.131677	0.248887	0	0.069979	0	0.0988009	0.0488697	0.197638	0.18914	0	0.126658	0.0568803	0.0517512	0.0858326	0.372049	0.0417881	0.120224	0.0607245	0.181717	0	0.0477783	0.204787	0.0701013	0.0597016	0.174852	0.338799	0.111568	0.105989	0.130561	0.0762101	0.125408	0	0	0.332657	0.954587	0.290918	0	0	0.132754	0
AC092436.3	0.0443798	0.0790425	0.0720734	0	0	0.0486777	0	0	0.0496917	0.0307154	0	0	0	0.142417	0	0.0341986	0.184407	0	0	0.0443172	0	0.0362151	0.0300325	0	0.029243	0.168264	0	0	0	0	0	0.147169	0	0.0815735	0.0948356	0	0.0741705	0.0609105	0.0533313	0	0	0	0	0.250505	0	0	0.167502	0.0929007	0.160558
AC027808.2	0.0576222	0.102628	0.0935791	0.0498646	0.0288569	0.0632025	0	0.0299941	0	0	0	0.0349854	0.0635831	0	0	0.0666046	0.089787	0	0.0319213	0.0287704	0.0258408	0	0.0194969	0.0338044	0.0189844	0.0546179	0	0.0206385	0	0.0217057	0.0465175	0.0636942	0	0	0	0	0.0240755	0	0.0346223	0.0759639	0	0	0.0302253	0.379461	0.132164	0.188755	0.761189	0.0603105	0.208467
AL354989.1	0.10127	0.480977	0.274106	0.087636	0.338103	0.185129	0.119454	0.0702855	0.151188	0.163542	0.176638	0.0409907	0.148995	0.252763	0.10518	0.0780375	0.525996	0.0671175	0.0748015	0.438217	0.151382	0	0.114218	0.514892	0.0444862	0.19198	0.0969679	0.145087	0	0.127158	0.136256	0.149255	0.0635563	0.217165	0.432809	0.0890787	0.141041	0.115826	0.243392	0.155756	0.0538212	0.0828812	0.247895	0.539868	0.154851	0.368592	0.382221	0.494641	0.183188
LINC01473	0.19218	0.368611	0.216071	0.153514	0.192486	0.113503	0.20925	0.215461	0.0827625	0.225091	0.174049	0.125658	0.212061	0.142319	0.230308	0.250617	0.23035	0.293928	0.0655157	0.147622	0.119331	0.132697	0.130051	0.329558	0.155855	0.588518	0.0849305	0.254152	0.176238	0.0668237	0.34609	0.326817	0.222666	0.176621	0.221131	0.104027	0.259418	0.101447	0.248708	0.0682104	0.129635	0.326666	0.666875	0.778812	0.542512	0.774807	0.0557955	0.55702	0.320895
AL445222.2	0.273063	0.486338	0.110864	0.147688	0.273497	0.336946	0.24157	0.0710689	0.191092	0.094494	0.0446517	0.248686	0.263647	0.182557	0.159529	0.184117	0.283658	0.305395	0.264723	0.443101	0.0918417	0.16712	0.161688	0.160194	0.134946	0.129413	0.196097	0.317859	0	0.0514301	0.16533	0.0377297	0.160662	0.219586	0.0729389	0.0900716	0.199658	0.163964	0.082035	0.224989	0.108842	0.50283	0.250658	0.834884	2.0355	1.1181	1.15945	1.21466	0.246974
AP001429.1	0	0.10805	0.032841	0.0349993	0.0405086	0.133083	0	0	0	0.0559832	0	0	0.133884	0	0	0.0311659	0.168054	0.120622	0	0.323097	0.0362746	0.0660071	0.0273693	0.237269	0	0	0	0.0869153	0.0964323	0	0.0979501	0.0447061	0	0.0371698	0.129639	0	0.0337965	0.138773	0.0486019	0.026659	0.0322419	0	0.084859	0.342436	0	0.264969	0	0.0846623	0.365801
AC136475.7	0.0724171	0	0.0882047	0	0	0.0794302	0	0	0.0810848	0.0501201	0	0	0	0	0.11282	0	0.11284	0.0719926	0.120352	0.0361574	0	0.0590942	0	0	0.0954349	0	0.0693408	0.0259376	0	0	0.0876918	0.0400241	0.0340864	0.066554	0.0773743	0.0955489	0.151285	0.0248478	0.130535	0.023867	0.0865958	0	1.89929	0.0340636	0.664394	1.97683	0	0.53057	0
AC109587.1	0.206	0.321034	0.167273	0.123796	0.154746	0.188292	0.101245	0.119144	0.153771	0.0950489	0.157199	0.194558	0.208368	0.12242	0.16938	0.136694	0.267491	0.13084	0.278958	0.217138	0.143704	0.135415	0.139404	0.275272	0.109345	0.282042	0.147937	0.143467	0.0818619	0.163819	0.272548	0.208732	0.10235	0.194581	0.275127	0.135901	0.17214	0.133512	0.165034	0.188592	0.13229	0.168594	0.156081	0.468343	0.0524989	0.174949	0	0.143741	0.165616
JPX	2.90035	3.14337	2.95665	1.81013	2.76432	3.42553	2.46161	2.39942	2.79209	1.70909	3.58512	1.82269	1.5334	1.83351	3.2663	2.5372	1.92141	2.17575	2.17806	2.16131	2.34076	1.45404	2.05446	1.75548	1.3432	2.20298	1.78497	2.60831	1.61628	2.49149	2.23978	2.20511	2.04663	1.93128	2.13663	1.5716	1.51325	1.68132	3.625	2.24051	2.15002	2.22311	2.73793	2.67843	2.31	4.3565	2.28438	3.91241	3.02176
NEAT1	13.4599	15.8105	11.9746	4.82826	21.2253	11.2698	2.53099	3.66683	4.55417	11.8531	9.82743	10.8498	11.4197	14.7735	6.0579	6.19668	12.7009	8.4642	8.23778	12.1754	4.79224	3.80309	7.18182	15.089	8.11157	14.9535	3.43659	19.3619	6.04471	8.24229	18.2713	26.5458	9.92161	13.9891	31.8539	8.18234	11.098	10.107	6.60409	4.88726	8.78017	4.08701	13.7008	52.8096	11.2164	7.89748	16.6981	28.0988	20.4085
AL118506.1	1.30059	1.01575	1.07303	0.619926	1.34446	1.00697	0.918834	0.651657	0.599638	0.659465	1.08271	0.878335	0.790477	0.721652	0.769313	0.94327	0.787515	0.864285	0.793704	1.43766	0.929463	0.891054	0.823654	0.856847	0.838663	0.883386	0.546087	1.06618	0.641213	0.838368	0.875894	0.837986	1.03449	1.07385	1.28559	0.728016	1.24955	1.2123	1.00295	0.861877	0.870491	1.53688	2.57565	1.58342	2.10571	1.4581	1.68002	2.27121	0.540986
AL354726.1	0.053322	0.284907	0.0432978	0.0461433	0	0	0	0	0	0	0	0	0.0588381	0.228151	0.0830714	0.123268	0.055391	0	0	0.15974	0	0.0435122	0.0360839	0.312817	0.0351352	0.101084	0.102114	0	0	0.120515	0.129138	0.176823	0.0501969	0.0980099	0	0.046903	0.0445576	0.0731835	0.0640771	0	0	0	0.0559394	0.401307	0	0	0	0.223239	0.0964549
GK-AS1	0.197562	0.234578	0.213895	0.313435	0.131917	0.25281	0.310714	0.068558	0.110604	0.319044	0.258445	0.2399	0.109	0.316993	0.153893	0.126866	0.581478	0.130936	0.145926	0.131522	0.0885969	0.0537385	0.20054	0.734039	0.108482	0.436943	0.0630564	0.707606	0.104678	0.124033	0.212651	0.65514	0.309971	0.363133	0.562895	0.231705	0.275149	0.158171	0.158273	0.151928	0.104997	0.161688	0.138173	1.02222	0.30209	0.790973	0.745654	0.551411	0.357372
ACBD3-AS1	0.400663	0.499519	0.357875	0.520083	0.32104	0.439464	0.236302	0.375403	0.628066	0.2773	0.419308	0.535178	0.176844	0.471441	0.24968	0.216123	0.624313	0.159326	0.221958	0.160039	0.0718711	0.163476	0.379589	0.564123	0.211205	0.379773	0.0383642	0.114804	0.25475	0.181111	0.323449	0.398595	0.37718	0.478691	0.599326	0.458159	0.234365	0.247456	0.240738	0.264099	0.287466	0.098373	0.168132	2.41234	0	0.962474	0.604886	0.335484	0.724764
FOCAD-AS1	0	0.225635	0.123445	0.0438525	0.203022	0	0.358643	0.0527557	0.0567402	0.0350722	0.0662913	0.0615346	0.055917	0.108412	0.0789473	0.195247	0.105282	0	0	0	0.0909009	0.082704	0.068585	0.118915	0.0333909	0	0.145566	0.108901	0.0402751	0.114532	0.204545	0.0560148	0	0.0465721	0.162431	0	0.0423456	0.104326	0.121792	0	0.121193	0.12442	0.212649	0.476729	0.23246	0.110665	0	0.106078	0.0916664
AL353708.3	0.108369	0.212312	0.175993	0.112536	0.217083	0.0950914	0.102262	0.225638	0.0728042	0.150006	0.170119	0.18423	0.047832	0.16229	0.101298	0.0668066	0.0450297	0.129281	0.144082	0.151503	0.136076	0.0530593	0.234673	0.0254302	0.142815	0.287614	0.124519	0.108681	0.155033	0.212273	0.139976	0.0958311	0.0408072	0.0995955	0.231575	0.285971	0.253559	0.163608	0.208364	0.142864	0.155505	0.0532149	0.159164	0.428189	0.397696	0.283991	0.24541	0.499071	0.117618
LINC00235	0.199798	0.19487	0.285846	0.082333	0.161998	0.166969	0.516236	0.168382	0.138488	0.138281	0.1618	0.15019	0.251962	0.142481	0.177868	0.205283	0.217434	0.198627	0.242449	0.38003	0.110933	0.186332	0.141645	0.290241	0.137921	0.0541089	0.23686	0.184015	0.143671	0.129021	0.268823	0.147234	0.179131	0.271061	0.31513	0.209221	0.270312	0.163226	0.0800324	0.169326	0.22754	0.140159	0.309417	0.214814	0.741951	0.498655	0.323183	1.1153	0.0688413
AC005062.1	0.108682	0.186123	0.067885	0.115754	0.0669876	0.119207	0.187364	0.0522207	0.131051	0.0057861	0.109365	0.121821	0.064575	0.134141	0.11722	0.051538	0.0607918	0.157912	0.0833639	0.0500902	0.0899791	0.0477548	0.113149	0.147136	0.110174	0.174334	0.0800502	0.131751	0.073089	0.081879	0.134981	0.073929	0.110183	0.153666	0.0714596	0.0808911	0.0978043	0.0860563	0.170789	0.0716384	0.0866408	0	0.429756	0.133704	0.0767008	0.310371	0.126215	0.0525012	0.136105
AC104365.2	0	0.0284907	0	0	0.0320441	0	0	0	0	0	0	0.0388495	0.0353028	0	0	0	0.0664692	0	0	0	0	0	0	0	0	0	0	0.022918	0	0	0	0	0	0	0.0341833	0	0.0267346	0	0.0384463	0	0.0255048	0	1.30898	0	0.880571	0	0	0.468802	0.578729
AC009269.5	0.0364549	0.259711	0.0592031	0.220829	0.109538	0	0	0.113855	0.0408182	0.100922	0.0476892	0.0442672	0.160904	0.116986	0	0	0.113608	0.108724	0.0403902	0.0728068	0	0.0892444	0.148017	0.171092	0.0720631	0.345542	0	0.104456	0.0289734	0.0274644	0.264865	0.201482	0.102955	0.20102	0.116851	0.0641326	0.182777	0.0500336	0	0.0480588	0	0	0.26771	0.308658	0.501686	0.87572	0	0.228934	0.263775
AC107081.2	0.133637	0.309419	0.108514	0.0693876	0.32124	0.0879477	0.126106	0	0	0.0369964	0.139857	0.194732	0.0884772	0.05718	0.124918	0.0617878	0.194352	0.0531416	0.118451	0.160139	0	0.065431	0.0542608	0.282237	0.105669	0.202672	0.127961	0.0957297	0.0637271	0.040272	0.19419	0.0886318	0.075483	0.122818	0.257014	0.14106	0.201009	0.128391	0.0642369	0.0704703	0.106535	0.131246	0.196276	0.427452	0.613032	0.642049	0.100877	0.671387	0.338434
AC107308.1	0	0	0.115653	0	0	0	0	0.148277	0.0797379	0	0	0	0	0	0	0	0	0	0.0789019	0.0711136	0	0	0	0.167113	0	0	0	0	0	0.107303	0.0574901	0	0.0670403	0.0654485	0.076089	0	0	0.0977402	0	0	0	0	0.14942	0.133991	0	0.311038	1.07513	0	0.12882
AC026356.1	0.142166	0.253204	0.141093	0.218713	0.142392	0.25989	0.0745301	0.197338	0.300677	0.0874609	0.144649	0.0959069	0.209164	0.0675879	0.196874	0.206931	0.1805	0.0785181	0.24502	0.473218	0.042503	0.180462	0.160343	0.259474	0.228988	0.0898358	0.363004	0.0565772	0.150653	0.166608	0.306049	0.122225	0.0594816	0.232277	0.219408	0.389049	0.158398	0.0867201	0.208806	0.156182	0.125927	0.31027	0.812008	0.490395	0.434769	0.62093	0	0.72746	0.971515
UBE2R2-AS1	0.132522	0.295035	0.0538044	0.114681	0.232283	0.218034	0.117238	0.0344909	0.074192	0.229298	0.0866808	0.241383	0.109673	0.141757	0.0516147	0.12765	0.275328	0.098809	0.110121	0.363922	0.0594298	0.108142	0.15694	0.660832	0.0218306	0.188419	0	0.0237327	0.078994	0.199679	0.294204	0.549326	0.187133	0.456723	0.353985	0.145711	0.193795	0.113678	0.079626	0.0655145	0.18488	0.162688	0.139027	0.342847	0.455937	0.289405	0.750264	0.485467	0.599302
AC016722.2	0.128496	0.104026	0.0853687	0.0303264	0.1053	0.128127	0.0413368	0.0243222	0.0653981	0.00808477	0.091688	0.0851089	0.0773392	0.0499819	0.109192	0.0630112	0.339772	0.0580649	0.0388274	0.128315	0.0628628	0.0381295	0.0711452	0.178178	0.038486	0.0664345	0.145408	0.11715	0.0185683	0.0176012	0.150884	0.064562	0.0659808	0.193242	0.162254	0.0822016	0.0878526	0.0400815	0.0982632	0.0307995	0.0558743	0.0860429	0.0980388	0.307705	0.214344	0.331633	0.220445	0.220076	0.0422614
SND1-IT1	0	0	0.00701561	0	0	0.00947656	0	0.00899461	0	0.00597967	0	0	0	0.0184838	0	0	0.00897508	0.0085892	0	0.0172553	0.00774911	0	0.0116934	0	0.011386	0	0	0.00618905	0	0.0065091	0.00697481	0.0191006	0	0.00794034	0.0276938	0	0	0.00592902	0	0	0	0	0.0271918	0.00812804	0	0.0943395	0	0.0180859	0
AC132192.2	0.710155	0.615767	0.561475	0.404307	0.580258	0.348468	0.176351	0.389113	0.313877	0.310421	0.513397	0.544637	0.226837	0.69967	0.320263	0.43203	0.660056	0.334417	0.351997	0.634505	0.201139	0.228752	0.26558	0.306981	0.320169	0.81484	0.214733	0.227581	0.222795	0.253429	0.241388	0.557755	0.263894	0.291979	0.718833	0.361648	0.609045	0.38474	0.561443	0.443465	0.506539	0.275307	0.666591	0.966967	1.11447	3.55063	1.55177	1.83866	0.473277
LINC01094	0.283288	0.155246	0.283116	0.150861	0.254637	0.541773	0.694013	0.249548	0.260263	0.155846	0.427603	0.273434	0.112213	0.202019	0.28291	0.173519	0.150913	0.194973	0.128767	0.297395	0.123784	0.100767	0.14255	0.085227	0.177093	0.206552	0.14606	0.0728467	0.0981424	0.147755	0.158327	0.192701	0.143599	0.313758	0.380291	0.370583	0.230655	0.378838	0.628481	0.129275	0.115813	0.570703	0.990645	0.574014	0.166605	0.0793142	0.0548312	0.152054	0.985468
SPAG5-AS1	0.368902	0.303628	0.295012	0.169293	0.408677	0.208445	0.197791	0.174568	0.125169	0.177949	0.175486	0.19683	0.160359	0.203284	0.148034	0.223972	0.243865	0.21671	0.179592	0.29024	0.185487	0.141395	0.211817	0.24921	0.198883	0.254304	0.112392	1.46143	0.213232	0.21897	0.266223	0.284207	0.31571	0.354446	0.818171	0.201579	0.275572	0.245484	0.208221	0.198952	0.227249	0.205852	0.287326	0.383857	0.230762	0.341777	0.843843	0.526518	0.414542
AC239584.1	0	0.0260776	0	0	0.02933	0	0	0.0304858	0	0.0202672	0	0	0.0323127	0	0	0	0.0608393	0	0	0	0	0	0.0198166	0	0	0	0	0	0	0	0.02364	0	0	0	0	0.0257582	0	0	0	0	0	0	0.337929	0.0826461	0	0.0639498	0.110524	0.0612992	0
AC010327.5	0.135926	0.0847314	0.176596	0.0705756	0.217827	0.0745445	0.160332	0.141507	0.0913169	0.112889	0.106688	0.132044	0.089992	0.159937	0.0847044	0.07332	0.0988397	0.0540515	0.0301198	0.217174	0.158486	0.0776432	0.091983	0.111638	0.116434	0.154607	0.0260303	0.146053	0.10803	0.112644	0.109731	0.105174	0.153551	0.162397	0.217845	0.143475	0.113584	0.1679	0.179676	0.170232	0.0866873	0.0333732	0.142598	0.294109	0.187058	0.207786	0.102604	0.256081	0.0737632
AC090527.4	0.0782316	0.069667	0.127049	0.0338497	0.117534	0.128712	0	0	0	0.0270722	0.0511701	0	0	0.167366	0.0609392	0.0602845	0.121901	0.0388865	0.216692	0.156242	0.140332	0.0319195	0.0529406	0.18358	0.0257744	0.148306	0.0374541	0.140101	0.0621765	0.0884073	0.0947327	0.0864753	0.0368232	0.0718978	0.208967	0.0688138	0.0653729	0.0536857	0.141016	0.0515668	0.0623658	0	0	0.257591	0.897175	0.512532	0.295268	0.409407	0.212271
AC011933.2	0	0.0205256	0	0	0.0153904	0.00842701	0	0	0	0	0.0100506	0	0	0	0	0	0.0159621	0	0.0170247	0	0	0.0062695	0.0155975	0.00901451	0.0050625	0	0.00735658	0.027518	0	0	0	0.0169851	0	0.0211828	0.00820889	0	0.00642013	0.0210894	0	0.00506426	0	0.0377273	0.0161202	0.0361392	0	0	0	0	0
AC099850.4	3.2053	4.63839	3.84986	5.48977	4.34741	5.85953	3.15069	3.54548	2.16832	1.20163	3.05746	2.75698	1.25265	5.50015	2.8089	4.42537	4.7864	4.31507	3.03342	4.06766	2.27592	2.45213	2.71135	2.03711	1.49604	1.77228	0.767285	1.38722	1.59218	2.21358	4.04311	1.69772	2.5774	4.84828	2.56854	4.69906	3.85028	3.84932	3.37034	2.72902	5.85578	7.54193	6.86539	7.16164	7.96445	7.58313	4.78868	2.93549	3.9862
C5orf66	0.161169	0.166489	0.149192	0.0892614	0.135597	0.0989952	0.0532302	0.0838934	0.057747	0.102622	0.0759011	0.109596	0.163614	0.0999919	0.0552394	0.106808	0.274573	0.0961344	0.082141	0.170598	0.0664943	0.0815412	0.0828898	0.166409	0.0807107	0.0611064	0.0401238	0.083125	0.0794177	0.121422	0.137916	0.106891	0.115309	0.231068	0.282411	0.0907308	0.118517	0.159265	0.123953	0.104111	0.125913	0.126627	0.236712	0.354794	0.177438	0.3942	0.498803	0.323881	0.262386
AL513550.1	1.3479	0.640954	0.478179	0.634175	0.734001	1.09088	0.463083	0.558572	1.37735	0.208314	0.462218	0.667414	0.779766	0.40595	0.815499	0.615137	0.747677	0.650482	0.492968	1.69883	0.598597	0.63005	0.327663	0.214961	0.707081	0.496163	0.964844	0.824935	0.197614	0.40422	0.570479	0.303772	1.08411	0.469047	1.0207	0.529505	0.918573	0.942942	0.597584	0.543434	0.959778	1.15669	1.3866	1.15725	1.92098	0.885927	0.493916	0.958783	0.615474
AC244517.7	0.0538579	0.0959234	0.043733	0.0466071	0	0.177221	0	0.112139	0.120609	0	0.0704554	0.196199	0.297147	0.057611	0.335625	0.0415024	0.0559477	0	0.119344	0.107564	0.0966107	0.175798	0.255126	0	0.177442	0	0.30942	0.077161	0.0856099	0.162302	0.173915	0.297666	0.0507013	0.0494975	0.115089	0.142123	0.0900109	0.0369595	0.0647211	0.142003	0.0858705	0	0.113003	0.304005	0.247061	0.940929	0	0	0.389697
ZNF433-AS1	0.494944	0.414832	0.366436	0.223603	0.349928	0.471025	0.532302	0.640296	0.615309	0.226689	0.590342	0.38889	0.297167	0.436005	0.351523	0.398225	0.378051	0.246022	0.42741	0.316172	0.264392	0.344492	0.256128	0.328792	0.290161	0.317359	0.449526	0.250269	0.205362	0.329013	0.370181	0.213208	0.349452	0.374601	0.408284	0.326521	0.334523	0.452036	0.507308	0.343037	0.249506	0.464641	0.484878	0.510133	1.33556	0.468907	0.398336	0.205691	1.21789
AL390728.6	3.19984	3.73809	2.24905	1.92047	3.85969	1.94355	3.22649	2.93721	2.56192	1.86933	4.16343	3.44687	2.0122	2.96276	3.35019	2.01503	3.35973	2.20623	4.17426	3.93402	2.34533	1.96538	1.7812	3.45163	2.28982	5.60943	0.807158	1.70064	1.28525	1.78858	2.22209	3.49899	2.05678	4.31629	3.71297	1.6797	2.86077	2.57364	3.55582	1.96177	2.42746	0.633582	2.68913	8.41584	1.26267	3.75692	0.194792	2.44882	2.2406
CCAT2	0	0.0217908	0	0	0	0	0.0144317	0	0	0	0	0	0	0.0130874	0.0190609	0.00942805	0.0127096	0	0	0	0	0	0.00827952	0	0	0	0	0	0	0.0276525	0.00987701	0.0135241	0	0.0112443	0	0	0.0102238	0	0.0147026	0.00806466	0.00975356	0	0.0385062	0.0920806	0.0561246	0.0534375	0.0461778	0	0
SCARNA9	0.485789	1.5682	0.345156	0.105097	0.729843	0.532835	0.214881	0.126434	0.203976	0.546352	0.158874	0.442422	0.469038	0.389731	0.189205	0.233965	1.00928	0.241471	0.201837	0.424466	0.16339	0.445969	0.287649	2.56492	0.520161	0.690693	0.348865	0.304491	0.144785	0.274488	0.931405	0.335612	0.171494	0.948725	0.843446	0.160241	0.304456	0.333369	0.145943	0.480316	0.242043	0.745461	0.191113	1.37104	3.89979	2.51958	0.916753	11.9487	3.29531
NORAD	50.0857	43.7908	52.7225	34.0418	50.2779	51.8888	27.8038	37.1161	31.4051	37.7016	40.347	44.9404	55.9757	39.4336	48.0999	49.5322	51.9498	43.0786	61.2975	52.5648	42.1384	44.7896	44.3458	46.1838	46.6403	50.4008	51.883	39.0592	36.5329	45.6886	48.3548	49.2081	35.2029	53.2295	45.9214	40.9272	44.4902	49.2185	50.2298	49.258	46.4733	97.7673	110.159	105.41	84.3148	83.6184	14.1229	202.832	51.8184
KCNQ1OT1	0.0196426	0.0493529	0.0146208	0.0109274	0.0206107	0.0443722	0.00386159	0.00681639	0.0157098	0.0140802	0.0143775	0.0127779	0.0229647	0.0215117	0.0185795	0.0140552	0.0490686	0.019295	0.0145087	0.0352601	0.0111158	0.0104951	0.011077	0.0279855	0.0117103	0.0274844	0.033586	0.019096	0.0104076	0.0135652	0.0798522	0.0297254	0.00880541	0.0442711	0.0334796	0.0133699	0.0242302	0.019417	0.0258526	0.0118686	0.0160318	0.0384673	0.103279	0.0697363	0.0429076	0.164435	0.0873754	0.268246	0.0583736
AC010618.2	0.512587	0.580962	0.302708	0.0806506	0.373383	0.153335	0.0549659	0.194049	0.0521763	0.387014	0.0609592	0.33951	0.205677	0.0498461	0	0.0359086	0.435662	0	0.206517	0.325731	0.0835893	0	0.126137	0.164025	0.153526	0.530031	0.0446193	0.100142	0.222214	0.175533	0.075237	0.463583	0.307074	0.299782	0.647253	0.0819782	0.194697	0.15989	0.167993	0.0921475	0.22289	0.114412	0.244431	0.569899	0.641285	0.610581	0	0.195091	0.168586
MIR155HG	0.656461	0.369845	0.402507	0.42896	0.442809	0.279197	0.963965	0.488155	0.795037	0.509972	0.525773	0.227755	0.310444	1.28977	0.354819	0.196151	0.431427	0.745843	0.534363	1.09702	0.276367	0.120257	0.271982	0.251505	0.909256	0.86351	0.0513122	0.143954	0.287489	0.22205	0.281198	0.488694	0.315299	0.0985	0.987683	1.26093	0.604536	0.376941	0.499081	0.43271	0.405845	0.197361	0.281095	0.768816	0.122913	0.175542	0.202259	0.44871	1.40559
AC022211.4	0.696653	1.71799	0.870286	0.463741	0.912455	0.646562	0.379265	0.502102	0.180008	0.482156	0.841237	1.56175	0.236529	0.630552	0.25046	0.371654	1.67004	0.692569	0.415616	0.909721	0.240319	0.174919	0.616493	1.88629	0.247176	1.42225	0.102624	0.115163	0.170364	0.403727	1.16805	1.18471	0.504478	1.13275	1.37417	0.329962	0.716487	0.551621	0.25759	0.388555	0.512647	0.394722	0.562191	1.56284	1.72078	0.702169	0.202259	0.224355	0.387749
AL731566.2	0.387321	0.660272	0.44031	0.201106	0.399021	0.473383	0.43076	0.311059	0.346944	0.206794	0.188196	0.430011	0.366333	0.414311	0.258606	0.162024	0.643759	0.209028	0.147131	0.419927	0.188583	0.198669	0.157264	0.662197	0.204173	0.48251	0.296694	0.190253	0.140724	0.266789	0.294811	0.330276	0.270861	0.579711	0.815846	0.214151	0.240432	0.425273	0.545234	0.233421	0.388168	0.516242	0.406333	0.94738	0.0507643	0.555838	0.375907	0.764452	0.760684
AL807757.2	0.0275166	0.0980168	0	0	0.0275604	0.0301814	0.0324574	0.057293	0.0308102	0.0190444	0	0	0.0303632	0	0	0.0424081	0.0285843	0	0.0304871	0.0824334	0.0740393	0	0	0.0645712	0.0543942	0.104328	0.0263477	0.0197112	0.0218695	0	0.0444275	0	0.0259039	0.0252888	0	0.0242041	0	0	0	0.0181377	0.0219361	0	0	0.258866	0	0.120183	0.207711	0.0576008	0
AL683813.2	0.255691	0.461723	0.167252	0.0799023	0.305895	0.576488	0.209446	0.436257	0.246532	0.0688197	0.306614	0.344985	0.34484	0.129157	0.221304	0.186087	0.420553	0.141218	0.346248	0.241145	0.152887	0.156488	0.115354	0.158336	0.149761	0.430863	0.761692	0.16281	0.0846738	0.165878	0.430033	0.109914	0.193902	0.385122	0.402203	0.156188	0.154313	0.170592	0.503572	0.0842701	0.130228	0.191824	0.454522	0.841906	0.553882	0.977173	0.187649	0.74339	0.192718
AC021078.1	1.08964	1.39695	0.955339	0.66801	1.25794	1.08082	0.465517	0.749367	0.608643	0.669971	0.850719	0.916264	0.687457	0.825727	0.676711	0.69813	1.92607	0.607018	0.739764	1.13272	0.601076	0.52662	0.614763	2.21625	0.639489	1.77864	0.658336	0.78411	0.374816	0.61335	2.21015	1.34714	0.586494	1.17023	2.19322	0.578575	1.08062	0.747759	1.04098	0.696975	0.718275	0.292522	0.747331	2.67132	1.05891	3.42574	0.76819	1.17425	1.03268
LINC01424	0.0623728	0.166633	0.118177	0.0179919	0.10412	0.114022	0.0245241	0.0432893	0.0698383	0	0.0271981	0.0757395	0.0688251	0.088959	0.0323906	0.0961277	0.0215977	0.0206691	0.0921414	0.12457	0.0559424	0.0678638	0	0.195154	0.0684984	0.0788278	0.0398155	0.0297867	0.0660965	0.125308	0.0503526	0.0689454	0.0391448	0.0955383	0.111071	0.0548642	0.104242	0.0285352	0.049969	0.0137044	0.0994465	0.102094	0.043623	0.156475	0.381495	0.0908074	0.156942	0.261131	0.112827
AC007622.2	0.175085	0.445479	0.253876	0.0649345	0.288098	0.0960207	0.0885099	0.0650981	0.112024	0.103866	0.0654405	0.136676	0.179398	0.107021	0.155868	0.125282	0.181879	0.186492	0.0415685	0.212304	0.0785173	0.112258	0.11002	0.337492	0.0906465	0.237081	0.071849	0.0806274	0.0496977	0.0847967	0.282688	0.221183	0.094185	0.32182	0.54785	0.0330017	0.0731535	0.15448	0.180343	0.115408	0.119638	0.122823	0.17056	0.611794	0.114738	0.273111	0.0944031	0.209433	0.248847
AC020612.3	0	0.0334891	0.0916091	0.0325432	0	0.082496	0	0.0783005	0.0421072	0	0	0.0913303	0.0414963	0.12068	0.117174	0	0.195326	0.0747712	0.0833314	0.075106	0.067458	0.0613751	0.101794	0.0441237	0.0495592	0	0.108026	0.0269387	0.0298884	0.0283317	0.182153	0	0	0.0691228	0.0401804	0.0992368	0.0314249	0.103227	0	0.0495765	0.089938	0.276998	0.039452	0.247648	0	0.3285	0	0.236163	0.34013
LRP4-AS1	0.225776	0.130097	0.28039	0.172394	0.372458	0.0291343	0.125325	0.0691315	0.0594823	0.119493	0.104243	0.258034	0.146548	0.0426193	0.0620719	0.184215	0.0965739	0.132031	0.191291	0.47744	0.226323	0.0867008	0.062912	0.0467481	0.157521	0.352479	0.0635838	0.142705	0.27444	0.340191	0.0643291	0.440413	0.300061	0.183085	0.539223	0.0350464	0.144274	0.355444	0.143638	0.192593	0.063525	0	0.167194	0.187413	0.36554	0.725081	0.200504	0.278011	0.12012
AC012073.1	0.735151	0.878634	0.832584	0.686403	0.79445	0.59415	0.730233	0.483371	0.281602	0.562359	0.658007	0.563808	0.384253	0.724297	0.241117	0.790118	0.663192	0.923168	0.385821	0.850026	0.485844	0.505181	0.484397	0.703669	0.5354	0.513448	0.0555727	0.457325	0.322892	0.466399	0.734036	0.577387	0.49173	0.924548	1.07486	0.646651	0.969973	0.823117	0.720694	0.663107	0.771129	0.997491	0.669758	0.891803	1.33119	3.21088	0.803193	1.13393	0.699907
AC026356.2	0.0835458	0.127542	0.0969138	0.0516415	0.0597704	0.0916367	0.0281563	0.0621259	0.0267273	0.049562	0.0624526	0.086957	0.0790186	0.0766008	0.0743757	0.0183941	0.123982	0.106786	0.0528941	0.131101	0.0428186	0.0292181	0.0484601	0.0840217	0.0550504	0.15838	0.159993	0.0256487	0.0379429	0.0539501	0.0867153	0.0263856	0.0224712	0.120657	0.114769	0.0629899	0.0698136	0.0655229	0.0860546	0.0157342	0.047573	0.0293038	0.26294	0.29193	0.218999	0.338834	0	0.574629	0.151127
AC016405.1	0	0.075005	0.0341959	0	0	0.0230956	0.0248373	0	0	0	0	0	0.0464694	0.090095	0	0.0162259	0.0656204	0	0.0233295	0	0.0188856	0.0687304	0.0427477	0	0.0277492	0.0399172	0	0.0301671	0	0.031727	0.0849927	0.0465506	0	0.0387033	0	0	0.0175954	0.0433494	0.0506071	0	0.0671443	0	0.02209	0.0594273	0.0965917	0	0	0.0881553	0.0380893
AC107068.1	0.411634	0.380146	0.577715	0.369409	0.478458	0.523961	0.221792	0.46028	0.364171	0.298962	0.358992	0.45048	0.549546	0.375086	0.435445	0.528668	0.607095	0.429429	0.647508	0.345082	0.319058	0.452019	0.416119	0.29217	0.438666	0.539498	0.394148	0.334913	0.254455	0.394346	0.471792	0.280871	0.35402	0.593148	0.646144	0.460423	0.41192	0.348741	0.500768	0.388572	0.599587	0.262025	0.469159	0.879678	0.489554	0.843446	0.134264	1.39358	0.707839
AP001160.4	0.280569	0.499706	0.0911294	0.145678	0.449624	0.123096	0.0661893	0.116836	0.251321	0.11651	0.220219	0.340695	0.123837	0.060024	0	0.129722	0.174873	0	0.124343	0.168104	0.150986	0.0457903	0.113919	0.329195	0.0739496	0.425505	0	0.0401965	0.267587	0.126825	0.135899	0.248107	0.2113	0.360995	0.419685	0.148076	0.234453	0.115523	0.134864	0.147951	0.134201	0.137774	0.235473	0.527897	0.772228	0	0	0.822244	0.20301
AC018809.1	0.310097	0.759408	0.251801	0.100631	0.31059	0.255096	0	0	0.0434016	0.214619	0.152122	0.0470689	0.171088	0.12439	0.181165	0.119479	0.362395	0.0385349	0.171786	0.309659	0.243361	0.126524	0.104924	0.318361	0.255414	0.514377	0.40827	0.111067	0.184843	0.116811	0.375505	0.385621	0.218942	0.391862	0.538402	0.0681916	0.161955	0.186201	0.186322	0.229952	0.247208	0	0.284654	0.510523	1.06688	1.60834	0	1.70396	0.280469
AC024361.3	0.128742	0.229295	0.313617	0.222818	0.644731	0.0706047	0	0	0	0.0445512	0.252624	0.234497	0.14206	0.0688564	0.100284	0.14881	0.133737	0.0639934	0	0.321399	0.0577343	0	0	0.302108	0.084831	0.366088	0	0.0461112	0.0511603	0.0484957	0.103931	0.142308	0.181794	0	0.412663	0.0566216	0.0537903	0.353391	0.232063	0.127291	0.051316	0.158047	0.0675305	0.605575	0	0	0.72886	0.538991	0.116441
GK-IT1	0	0.0480825	0	0	0.0540794	0	0	0	0.0604562	0	0.0706328	0	0	0.173268	0	0	0.168266	0	0.0598223	0	0.048427	0	0.109615	0.190054	0.0711555	0.204714	0	0.812231	0.0429128	0.0813555	0.0871764	0.0596832	0	0	0.115379	0	0.0451188	0.0741053	0	0	0	0	0.0566439	0.355566	0.247684	0.707475	0.611361	0.339076	0.195339
AC018695.4	0.279999	0.415575	0.252623	0.0538451	0.467407	0.238867	0.110091	0.0971653	0	0.129192	0.162794	0.302225	0.308964	0.133116	0.193873	0.119869	0.355499	0.154643	0.0344695	0.341738	0.195325	0.253874	0.147373	0.547543	0.102499	0.294889	0.178736	0.022286	0.0741787	0.14063	0.3265	0.171947	0.146438	0.371698	0.963979	0.109463	0.233976	0.298895	0.0747721	0.102535	0.223213	0.152771	0.522209	0.790236	0.285429	0.951172	0.469686	0.651249	0.337662
AL442125.2	0.205124	0.274001	0.333124	0.0887542	0.256813	0.281236	0	0.106773	0.114838	0.106475	0.134169	0.124541	0.226344	0	0.239675	0.11855	0.532708	0.152941	0.170451	0.409669	0.0919882	0.292926	0.104108	0.300843	0.202742	0.583288	0.294615	0.183673	0.122271	0.115902	0.372585	0	0	0.235646	0.164374	0.0451076	0.0857042	0.246338	0.184873	0.236615	0.163524	0.377724	0.215193	0.530675	0	0.559943	2.12904	1.18082	0.371051
MIR4453HG	0.885999	1.10715	0.957315	0.544122	1.12357	0.736689	1.2305	0.885187	0.888041	0.573641	0.934708	0.928372	0.749009	0.871309	0.901657	0.732295	0.927799	0.752946	1.06873	1.5269	0.589583	0.594724	0.536712	0.955719	0.574391	0.988803	0.519963	0.506716	0.442946	0.608281	0.940212	0.702929	0.497752	0.879933	1.56502	0.710205	1.09861	0.701172	0.77277	0.58872	0.89998	0.508752	0.787067	2.20478	1.11441	1.13907	0.99781	1.10682	0.956447
AC005534.1	0.144444	0.128631	0.187663	0.049999	0	0.0633729	0	0	0	0.019994	0	0.0350797	0.0318772	0.0618037	0	0.0222614	0.0300097	0.0287194	0	0.086544	0.0777313	0.047148	0.0195495	0.0677911	0.0380711	0	0.0276615	0.0206941	0.0229601	0.0435285	0.0466429	0	0.108782	0.0530997	0.185198	0.025411	0.0482808	0.0396493	0.104147	0.0190422	0.0460599	0.0709293	0.181841	0.407662	0.265041	0.31544	0	0.423312	0.104514
AC005096.1	0	0.0306893	0.0279835	0	0.0345169	0	0	0	0	0.0238514	0	0.0418475	0.0380272	0.0737273	0.0536892	0.0265562	0.0715986	0	0.0763648	0	0	0.028122	0	0.0404349	0	0.0653308	0	0	0.0273897	0	0	0	0	0	0	0	0.0287977	0.118247	0	0	0	0	0	0.0648413	0.158087	0.225778	0	0	0
GASAL1	0.492508	0.364367	0.42453	0.406531	0.819622	0.59838	0.214501	0.512731	0.466618	0.52441	0.693845	0.423238	0.342796	0.364727	0.306915	0.344489	0.550973	0.542349	0.512095	0.877697	0.672792	0.723419	0.297395	0.444512	0.264614	0.344736	0.166869	1.89428	0.548006	0.342504	0.50158	0.661663	0.499307	0.313361	0.493839	0.359904	0.607836	0.504369	0.573636	0.624306	0.712765	2.21383	1.07311	0.420563	0.86895	1.20793	0.514762	0.999249	0.39748
AC004471.1	0.184153	0.131194	0.0897202	0.0956166	0.0737785	0.363578	0.304107	0.268401	0.082478	0.0764719	0.144542	0.134171	0.162563	0.27578	0.229517	0.170288	0.114779	0.0732296	0.204033	0.147115	0.0330336	0.0901644	0.12462	0.172856	0.0485373	0.0698209	0	0.0527665	0	0.11099	0.386527	0.122135	0.138688	0.169244	0.118056	0.226778	0.338546	0.126374	0	0.0728314	0.0880837	0.271286	0.850048	0.173244	0.506858	1.12604	0.278019	0.308392	0.799482
MED8-AS1	0.293235	0.496151	0.333352	0.17763	0.675512	0.546776	0.0345887	0.183165	0.0328333	0.182654	0.11508	0.320468	0.226498	0.250935	0.365469	0.158174	0.335074	0.291516	0.194934	0.234257	0.105201	0.0717862	0.178593	0.240839	0.038644	0.277946	0.0842334	0.168044	0.0233056	0.220917	0.733844	0.259308	0.165629	0.323392	0.532623	0.232141	0.294044	0.181107	0.211428	0.173958	0.163636	0.503976	0.707546	1.35173	0.134515	0.512298	0.996076	0.736597	0.424349
AC006111.2	0.260918	0.339594	0.0488925	0.138949	0.221128	0.0660431	0.142047	0.167158	0.0898918	0.0972368	0.157535	0.243718	0.0885877	0.214693	0.0625369	0.0927974	0.125097	0.159624	0.111187	0.300635	0.0360029	0	0.122239	0.0941966	0.105801	0.114145	0.115308	0.158151	0.0159517	0.0907251	0.275446	0.155299	0.0944716	0.0553371	0.107223	0.194199	0.184489	0.0964132	0.0241189	0.0661484	0.144002	0.0492786	0.442173	0.604214	1.10484	1.18343	0.303009	1.80661	0.0363061
AP000692.1	0.287724	0.0960844	0.146021	0.186741	0.324204	0.157794	0	0.112327	0.201352	0.149351	0.423442	0.393057	0	0.0384718	0.39222	0.194003	0.448332	0.214528	0.0796962	0.215489	0.0322576	0.0293488	0.121692	0.253193	0.0710958	0.204542	0.172188	0.0772905	0.114338	0.108383	0.464551	0.516821	0.13543	0.165268	0.691695	0.126544	0.30054	0.197448	0.432198	0.142241	0.114686	0.0883046	0.716888	1.28573	0.494951	0.471254	0	0.451722	0.195176
AC015849.3	1.18598	2.26875	1.3197	1.02631	1.45183	1.34901	0.103624	0.685932	0.19673	0.486412	0.804462	1.65349	0.920912	0.46986	0.958045	0.406179	2.55525	0.698682	0.389335	1.88611	0.630345	0.537661	0.326973	1.59767	0.781471	0.8327	1.26177	0.471979	0.279285	0.595662	0.744662	1.2624	0.868364	1.73586	2.25273	0.231824	0.991042	0.693294	1.10848	0.376395	1.05051	0.970627	2.2119	3.34717	0.60449	1.43887	0.828929	3.67795	1.43022
AC008760.1	0.749929	1.19653	0.532828	0.324483	1.56483	0.616916	0.479149	0.487951	0.279896	0.497402	0.490517	0.531207	0.344795	0.802187	0.292082	0.409337	0.908864	0.465958	0.519303	0.842479	0.25223	0.280482	0.31718	0.989888	0.658863	0.947772	0.209437	0.537203	0.39735	0.282491	1.08469	0.794413	0.911885	1.43586	1.76946	0.164912	0.574443	0.750505	0.713442	0.391336	0.448379	0.690475	1.31123	2.14591	1.72006	0.818855	1.53316	1.24278	0.395662
AC093297.2	2.12907	2.35102	2.41343	1.31181	2.0898	2.05503	0.652953	1.67567	0.829597	1.23777	1.41487	2.68875	1.82307	1.37557	1.65846	2.48721	3.02558	1.7356	3.23642	2.05803	2.14635	1.89026	1.83843	2.23826	2.09873	2.92216	1.86738	1.56784	1.05589	2.07237	1.83564	1.86391	1.6355	2.48109	2.06553	1.36337	2.02108	2.03379	2.54827	1.79072	1.95527	2.32097	3.02873	7.3468	1.79706	3.34764	1.63928	4.18939	2.31078
AZIN1-AS1	0.19144	0.149817	0.179003	0.0702828	0.191744	0.413596	0.2395	0.271774	0.331274	0.132496	0.265614	0.204288	0.256053	0.13652	0.37055	0.151992	0.138605	0.132646	0.205679	0.220135	0.208125	0.255633	0.125625	0.129326	0.160548	0.17596	0.2333	1.23422	0.165984	0.131115	0.196695	0.1539	0.169297	0.133288	0.14876	0.147982	0.218145	0.119431	0.355537	0.179723	0.134116	0.541251	0.340814	0.485722	0.292729	0.126688	0.131372	0.437174	0.230865
AL139393.3	0.349319	0.414768	0.429771	0.174046	0.233249	1.89252	0.724193	0.374682	0.485949	0.234438	0.263103	0.424178	0.385455	0.26043	0.742104	0.220239	0.296896	0.178897	0.69196	0.317114	0.322799	0.215949	0.279369	0.57132	0.341775	0.220737	0.506787	0.257813	0.227152	0.295069	0.282	0.175513	0.189335	1.13822	0.237511	0.614533	0.212292	0.290566	0.457938	0.286075	0.3713	2.72894	1.69907	1.02571	0.53414	0.300517	0.199762	0.132951	0.727627
AC026771.1	0.0516517	0.367976	0.0419415	0.0446979	0.103468	0.0566538	0	0	0	0.0714966	0.0675692	0.188162	0.056995	0	0	0.238814	0	0.0513489	0.171683	0	0	0.0421491	0.0349535	0.121207	0	0.293752	0	0.111	0.0410515	0.0389134	0.0416976	0.171284	0.0486244	0.427229	0.22075	0.0454337	0	0.106337	0.18621	0.068093	0.123529	0.126818	0.0541871	0.24296	0.236941	0.451193	0	0	0.2803
AC105137.2	0.130704	0.23279	0.0884437	0.075405	0.130912	0.0716809	0.231259	0	0.0731741	0.0753839	0.0854916	0.132262	0	0.139812	0.0339377	0.0839326	0.0678877	0.108282	0.0482713	0.152273	0.0390763	0.0355526	0.0884495	0.178916	0.0861242	0.0412965	0.14601	0.109233	0.0173134	0.0984699	0.158273	0.048159	0.082029	0.180183	0.162926	0.0574847	0.0910171	0.16444	0.157067	0.0574361	0.0868304	0	0.0228533	0.245923	0.299788	0.380579	0.246657	0.182403	0.157621
AC025265.1	0.12099	0.359149	0.311109	0.0523508	0.565519	1.68096	0.28543	0.650785	0.496731	0.153519	0.105517	0.465243	0.845541	0.0431405	0.502648	0.170929	0.796004	0.0601406	0.491522	0.463142	0.126603	0.213918	0.122814	0.1183	0.106298	0.191137	2.68387	0.130005	0.176294	0.0911518	0.944179	0.0668699	0.113899	0.240922	0.797181	0.1419	0.0337012	0.0830286	0.751203	0.106335	0.160755	0	0.655801	0.910585	0.277508	1.6734	0.913304	1.47741	2.18861
CNIH3-AS2	0	0	0	0	0.0532743	0	0	0.0553738	0	0	0	0	0.117384	0	0	0	0	0	0	0	0	0	0.0359943	0.0624082	0.0350481	0	0	0	0	0.0400721	0	0	0.100145	0.0488834	0.0568308	0.0467866	0.0444471	0	0.0639181	0	0.0424026	0.130594	0.167402	0.600466	0.243996	0.232314	0	0.222685	0.0962156
AC138028.4	0.673852	1.24155	0.830192	0.311674	0.826199	1.46548	0.246676	0.350761	0.806542	0.313597	0.30397	0.846476	0.67946	0.534393	0.579203	0.420782	1.32758	0.554401	0.566383	0.846927	0.385553	0.350786	0.369522	0.504373	0.428707	0.396446	1.32383	0.257998	0.295482	0.45515	1.10674	0.423799	0.229681	0.672683	1.60133	0.572292	0.572801	0.510262	0.809768	0.352275	0.444572	0.228204	1.19447	1.84715	1.54557	0.964134	1.35935	1.99427	0.294227
AC009704.2	0.0887597	0.158085	0.0360367	0.115215	0.0889008	0.0973555	0	0.138606	0	0	0.0580564	0.107781	0	0.0949448	0	0.0683973	0.230509	0.176479	0	0.0443172	0.119413	0.0724302	0.0600651	0.312428	0	0.168264	0	0.635819	0.035272	0.0334349	0.143309	0.0981128	0	0.24472	0.379343	0.0780745	0.0370852	0.0609105	0.0533313	0.0585064	0.0707587	0	0.186233	0.250505	0	0.484588	0	0	0.240838
AC010973.1	0.125844	0.597691	0.17031	0.0726013	0.294103	0.230052	0.0494801	0.262023	0	0.11613	0.10975	0.254688	0.324012	0.179485	0.130703	0.161624	0.479333	0.125107	0	0.0418889	0.0752467	0	0.0283869	0.246091	0.0276406	0.159044	0.20083	0.090147	0.0666786	0.158014	0.33864	0.231842	0.157958	0.231311	0.358557	0.110695	0.0350532	0.057573	0.201636	0.0829508	0.0668815	0.102993	0.176029	1.10497	0	0	0.316648	0.0878102	0.0758804
AC020663.3	0.0196475	0.227456	0.0159539	0.136019	0.177109	0.129302	0	0.0613629	0	0.0407944	0	0.0477161	0.04336	0.0840667	0	0.0302804	0.183689	0.0781294	0.174148	0.0392396	0	0.0480987	0.0132958	0.207474	0.0388388	0.0372463	0.0188129	0.0703714	0.0624615	0.0740104	0.174473	0.152025	0.055488	0.126398	0.293895	0.0345646	0.0164181	0.0674147	0.0472209	0.0259015	0.0469887	0.144719	0.0412239	0.20332	0.450643	0.12872	0	0.575797	0.0710813
AL162171.1	1.07476	0.638065	1.11513	0.361692	0.80735	0.81864	0.774729	2.23778	1.50425	0.702519	1.24975	0.580036	0.823569	0.638696	1.53485	0.92022	0.434179	0.593588	0.992317	0.894368	0.669413	0.755221	0.606089	0.2452	0.629498	0.339575	1.658	0.491875	0.569461	0.449835	0.674828	0.561006	0.871244	0.685933	1.02074	0.393906	0.399157	0.799005	1.72205	0.491967	0.880591	0.439801	0.219239	0.112343	0.410851	0.0651967	0	0.499956	0.108008
AL021707.7	0.20611	0.550638	0.292885	0.133771	0.619314	0.226071	0.0607796	0.0536434	0.11539	0.106987	0.0674068	0.12514	0.511722	0.220473	0.160551	0.198533	0.428215	0.204902	0.17127	0.308729	0	0.0840956	0.0348695	0.665037	0.0679056	0.48841	0.148016	0.147645	0.0409528	0.11646	0.207987	0.341744	0.19403	0.142067	0.440439	0.090649	0.344465	0.212162	0.123841	0.135859	0.0821549	0.126513	0.16217	0.533227	0.236371	0.337581	0.583438	0.215726	0
SLC16A1-AS1	0.119954	0.193488	0.079025	0.0920528	0.0838742	0.215974	0.144161	0.0918921	0.149516	0.0751881	0.0710579	0.219864	0.11488	0.181574	0.119884	0.0662741	0.166927	0.126	0.100304	0.176286	0.0791675	0.0517129	0.111806	0.148709	0.105884	0.128716	0.205877	0.0891698	0.0845433	0.136408	0.12607	0.0900636	0.110792	0.131042	0.0894735	0.0617152	0.0888894	0.0916359	0.106071	0.0611658	0.0667579	0.177821	0.232688	0.809096	0.155734	1.14174	0.691921	1.10389	0.245644
BNC2-AS1	0.250414	0.535199	0.366008	0.0433402	0.150487	0.988795	0.354453	0.521393	1.7384	0.103987	0.262068	0.608157	0.828957	0.214291	0.9363	0.308747	0.104052	0.398314	0.998809	0.150036	0.179678	0.163476	0.338919	0.41134	0.363009	0	0.911151	0.358763	0.238828	0.150926	0.404311	0.110721	0.0471475	0.598364	0	0.528644	0.167403	0.171845	0.361108	0.198074	0.119777	0.122966	0.157624	0.23558	0	0.109372	0	0.209678	0.181191
AC087392.4	0.0441059	0.392773	0.0716285	0.038168	0.088352	0	0	0.0459169	0	0.122103	0.057698	0.0535579	0.146006	0.141538	0.0687134	0.101963	0.366538	0	0.146602	0.132131	0.0395587	0.143966	0	0.207	0.058125	0.0836126	0.253393	0.0315947	0	0.0332285	0.142424	0.146261	0.124563	0.16214	0.141375	0	0.147425	0.0605345	0.212008	0.0581452	0.140644	0	0.231354	0.165972	0.404652	0.192639	0.332936	0.553963	0
AC007608.2	0	0	0	0	0.0187343	0	0	0	0	0	0	0	0.0206395	0	0	0	0	0	0	0	0.0167762	0	0	0	0	0	0	0	0	0	0	0	0	0	0	0	0	0	0	0	0	0.0918491	0.0196227	0	0	0.367627	0	3.48475	0
AC083900.1	1.09691	0.569814	0.779361	0.355963	1.51065	0.300785	1.13213	3.09279	0.614101	1.99284	1.49474	0.443994	0.907787	0.928901	0.640836	1.54966	0.189912	0.81786	1.26596	1.32356	2.54154	1.52914	0.9588	0.268129	0.602318	1.03972	0.043763	0.26192	2.10684	1.72165	0.479656	1.66718	1.93616	0.798081	1.36733	0.804051	1.41311	0.972296	1.48293	0.994172	1.93108	0	0.0958961	0.0429971	0.419319	0.199621	0.345004	0	0
AC005785.1	0.291639	0.3596	0.163947	0.0776541	0.247164	0.221457	0.0793857	0.128452	0.100476	0.139738	0.146736	0.163448	0.0990179	0.239971	0.122325	0.0518617	0.186434	0.234174	0.0994221	0.21282	0.0704232	0.137299	0.0910877	0.210574	0.147822	0.276434	0.150365	0.144631	0.142638	0.126759	0.162994	0.198382	0.147833	0.175248	0.551297	0.0690659	0.224957	0.177042	0.107835	0.0813303	0.0625942	0.0826209	0.14121	0.559278	0.411639	0.269452	0.635035	0.58701	0.365226
AC092910.3	0.390802	0.417621	0.277666	0.169094	0.303353	0.246473	0.230486	0.264452	0.240668	0.148761	0.383426	0.225412	0.30186	0.282173	0.182651	0.165631	0.517605	0.271957	0.119072	0.6244	0.166493	0.21526	0.191735	0.114633	0.212445	0.240777	0.159035	0.118977	0.116475	0.228177	0.244503	0.280789	0.174751	0.538742	0.427992	0.171878	0.408208	0.134092	0.563552	0.218959	0.202504	0.239879	0.450983	0.523903	0.492996	0.682753	0.1475	0.531744	0.106039
LINC02487	0.226342	0.134375	0.245055	0.217634	0.243495	0.110339	0.0889945	0.270545	0.112637	0.847083	0.548323	0.132334	0.342259	0.242115	0.143661	0.200257	0.226416	0.100007	0.130032	0.385076	0.458646	0.69092	0.414125	0.0590156	0.414285	0.381407	0.0240808	0.108092	0.732891	0.334728	0.16242	0.528186	0.220968	0.192608	0.689682	0.265459	0.287211	0.402696	0.705174	0.226555	0.380926	0.638059	0.77392	0.796532	2.07659	1.37303	0.34804	1.40386	0.227463
ZNF346-IT1	0.172635	0.256225	0.116817	0.0497977	0.317	0.157794	0	0.179723	0.193298	0.0995675	0.0376392	0.0698769	0.253991	0.0615549	0	0.0443435	0.268999	0.200226	0.127514	0.201123	0.12903	0.140874	0.116825	0.270072	0.0758355	0.218178	0.220401	0.103054	0.0914705	0.0650298	0.0929101	0.0636087	0.0541722	0.343758	0.276678	0.0253087	0.0240432	0.118469	0.242031	0.151724	0.0458744	0.211931	0.0905543	0.297748	0	0.377003	0	0.180689	0.364328
U91328.1	0.814859	1.16012	1.15476	0.507532	1.25282	1.38905	0.881584	1.75067	1.55746	0.829785	1.28324	0.794109	1.90712	0.816123	1.85167	0.771904	0.943524	0.706887	2.05292	1.14023	0.963604	1.43578	0.790263	0.852559	0.766067	1.02327	2.5097	2.70293	0.919882	0.84069	1.18995	0.849091	1.03094	0.844285	1.02037	0.744156	0.884766	1.1718	0.960505	0.745808	0.885443	0.458756	0.615279	0.610341	0.428559	0.249358	0.176303	0.521504	0.629035
FAM83C-AS1	0	0.0542294	0	0	0.060993	0.0667936	0.0718305	0.126793	0	0.0421465	0.0796626	0	0.134391	0	0	0.046926	0.063259	0.0605392	0.0674701	0.12162	0.054618	0	0.0412094	0	0.120378	0.115443	0	0	0.0483988	0	0.196642	0.134626	0.171981	0	0.0650648	0.0535653	0.0508868	0	0.073179	0	0.0485461	0	0.191656	0.114578	1.95543	0.664932	0	0.637373	0
AC008114.1	0.0502001	0.0894087	0.0815256	0.0434418	0.0502799	0.0550617	0	0.0522615	0	0	0	0	0.0553932	0.0536983	0	0.0386837	0.104296	0.0998117	0.111239	0.0501293	0.0450247	0.0819292	0.135885	0.0589004	0	0	0	0	0	0.0378198	0	0	0	0.276815	0.0536365	0	0.0838977	0.0688988	0	0.132359	0.0800385	0	0.105329	0.283358	0	0.219256	0.378939	0.525422	0.544846
AC078962.2	0	0.407589	0.0619421	0	0	0.0836703	0	0	0	0.158387	0.0997909	0.0926304	0.084174	0.163197	0	0	0.0792426	0.0758356	0.0845176	0.0761751	0.136836	0	0.0516218	0.268511	0.201059	0.723056	0.0730422	0.218577	0.242511	0.05747	0	0.505927	0	0	0	0	0	0	0	0	0	0	0	0.0717639	0	0.666352	0	0.47905	0
AC012442.2	0.243124	0.0721692	0.296128	0.245458	0.202926	0.133335	0.286779	0.210923	0.0907415	0.280445	0.159024	0	0.089425	0.173378	0.063128	0.218574	0.294651	0.362549	0.26937	0.283245	0.181716	0.231462	0.0822631	0.285261	0.373802	0.153632	0.116398	0.203186	0.0322049	0.12211	0.261694	0.134372	0.190729	0.22344	0.216473	0	0.304744	0.194649	0.340856	0.160257	0.0646058	0.198977	0.255058	0.114361	0.743519	0.26547	0.45881	0.593757	0.293194
AC099792.1	0	0	0.0445539	0	0.0366374	0.0300913	0.0215737	0.0380813	0.0307181	0.00632916	0.023926	0.0333137	0.0100908	0	0.0569875	0.0211407	0.0664975	0.00909121	0.0303961	0.0273957	0.0246061	0.00746241	0.00618845	0.0429189	0.00602575	0.0173361	0.0350254	0.00655079	0	0.0137791	0.0295299	0.0101085	0.00860885	0.0672355	0.0977082	0.0321758	0	0.0251022	0.032968	0.0301393	0.0145804	0.0224529	0.268624	0.154856	0.377548	0.659032	0.172576	0.746574	0.0661687
AC139887.2	0.939077	0.872629	0.53046	0.518212	0.627047	0.821031	0.385285	0.410891	0.563836	0.244904	0.445099	0.842848	0.630744	0.596887	0.402857	0.597792	1.06034	0.487081	0.497608	1.11443	0.415027	0.410921	0.524969	0.846334	0.493232	0.490209	0.508235	0.409468	0.227152	0.379375	0.87896	0.707066	0.435613	1.06317	0.901571	0.610542	0.602759	0.625754	0.915876	0.466491	0.607581	0.267325	0.985173	1.66447	0.686752	0.743035	1.38692	1.42448	0.615474
AC145207.8	0.41881	0.406865	0.123664	0.263583	0.838952	0.584652	0.08982	0.039637	0.127892	0.395263	0.0996136	0.508562	0.546159	0.285087	0.296578	0.264052	0.514162	0.264953	0.0843675	0.266139	0.307335	0.155345	0.20612	0.223361	0.0501754	0.144354	0.0364562	0.0545472	0.06052	0.258156	0.307363	0.336686	0.250895	0.209947	0.528839	0.100471	0.222709	0.365788	0.0915062	0.100386	0.273169	0.0934805	0.519253	1.50436	0	0.0831461	0.143701	0.0796999	0.0688719
ARHGEF38-IT1	0.141023	0.251168	0.0381704	0	0.235412	0.2578	0.110896	0	0.052634	0.0976023	0.184482	0	0	0.15085	0	0.253565	0.146495	0.046732	0.0520822	0.0938825	0.126484	0	0.0636216	0	0.0929235	0.0891135	0	0.235713	0.0373605	0.0354146	0.189742	0.103922	0.0442525	0	0.150676	0.0826973	0	0.0967756	0	0.123941	0.299793	0.115416	0.147945	0.309561	0	0.923906	0.35484	0.196803	1.02039
GABPB1-AS1	0.395543	0.55114	0.342461	0.256989	0.841085	0.858118	0.281117	0.310463	0.205376	0.13731	0.723108	1.06214	0.305661	0.356371	0.264374	0.384608	1.00195	0.5979	0.392622	1.1725	0.763247	0.337029	0.476234	0.251812	0.493313	0.728553	0.40861	0.293175	0.0981781	0.20681	0.616471	0.255162	0.472205	1.07794	1.53983	0.153658	0.643332	0.570277	1.05861	0.412882	0.215853	0.19607	0.22646	0.745398	1.2936	3.83667	0.50862	1.90935	0.209911
HECW2-AS1	0.640263	0.261327	0.346598	0.242403	0.28056	0.0877835	1.35311	0.95817	0.612349	0.424664	0.663079	1.11762	0.22078	0.642074	0.27015	0.339199	0.540398	1.89627	0.576372	0.506159	0.29909	0.217696	0.433276	0.0939035	0.536146	0.429874	0.0638608	0.439534	0.763297	0.462263	0.150755	0.250655	0.364154	0.147106	0.969129	0.492787	0.178341	0.256302	0.41676	0.316524	0.680552	0.0327502	0.993542	0.150584	0.0611888	0	0.151033	0.139611	0.313673
Z83843.1	0.634047	1.17071	0.755744	0.291962	0.617577	0.695451	0.150951	0.284623	0.332173	0.322074	0.426136	0.776989	0.962805	0.504007	0.770298	0.349633	1.54088	0.410582	0.850727	0.697049	0.349555	0.308541	0.401515	0.689335	0.379461	1.36739	0.896745	0.35002	0.212666	0.46015	0.892227	0.842319	0.350465	1.12266	1.19952	0.322351	0.627047	0.447085	0.60116	0.42177	0.449812	0.457027	1.32424	3.20681	0.747151	1.39735	0.131729	1.3029	0.368282
AC023825.2	0.095694	0.198841	0	0.0276036	0.0319487	0.0349871	0	0	0.0357159	0	0	0.154935	0.0703956	0.0682416	0.0496945	0	0.0662714	0	0	0	0.0286094	0	0.0647577	0.0748526	0.0420368	0	0	0.0228498	0	0.0240313	0.0257508	0.105778	0.0300285	0.0879464	0	0.028058	0.026655	0.0218897	0.0383319	0.0630772	0	0	0.167319	0.420118	0	0.0696596	0.120392	0.0667724	0.230803
RNF139-AS1	0.203765	0.239194	0.127854	0.101525	0.117506	0.0982038	0.142026	0.102852	0.0795082	0.07265	0.0928919	0.161206	0.136269	0.181637	0.101007	0.109438	0.186014	0.135047	0.123143	0.178813	0.0747644	0.0906968	0.064767	0.112295	0.101717	0.234111	0.0945983	0.0928866	0.0515287	0.090712	0.0722787	0.126269	0.07266	0.147544	0.319973	0.0896176	0.152213	0.105933	0.185503	0.0752965	0.118138	0.212246	0.187856	0.461809	0.453201	0.573089	0.302966	0.433006	0.290407
AC000123.1	1.20471	1.10981	0.809568	0.97062	1.16501	1.00242	0.343004	0.432474	0.325597	1.00629	0.380404	1.10977	0.962618	0.62211	0.841339	0.832299	2.24398	0.495577	1.10463	1.20301	0.745176	0.745778	0.843356	1.90091	0.848557	1.33877	0.715984	0.833219	0.462227	0.845009	0.771325	0.964301	0.74303	1.79438	1.55348	0.986598	0.485989	0.655674	0.748808	0.547647	1.09285	0.917957	1.52532	2.50117	1.33394	2.72158	0	2.00007	0.601161
CAPN10-DT	0.47158	0.443814	0.352466	0.185496	0.391819	0.376182	0.202275	0.20642	0.240011	0.155773	0.266392	0.292828	0.177397	0.378331	0.283855	0.198215	0.506578	0.245063	0.231557	0.663561	0.201868	0.179292	0.188574	0.245217	0.254239	0.38604	0.230905	0.199616	0.14055	0.234161	0.246589	0.319872	0.211881	0.270875	0.486685	0.240401	0.416458	0.279488	0.444343	0.19781	0.26914	0.368407	0.562191	0.952827	1.42579	0.760683	0.627002	1.14421	0.426524
Z68871.1	0.264869	0.269568	0.168988	0.0491164	0.625326	0.539537	0.133898	0.236353	0.360123	0.117846	0.0494991	0.160816	0.354898	0.161901	0.294746	0.145789	0.294799	0.206891	0.0419231	0.396743	0.203624	0.138947	0.140832	0.155387	0.112197	0.0717312	0.217386	0.149078	0.0601461	0.0997736	0.29019	0.271867	0.106862	0.452074	0.323429	0.29955	0.173904	0.298612	0.386499	0.224472	0.105576	0.0464515	0.972546	0.444962	0.0867876	0.330529	0.142813	0.475245	0.239562
ITFG1-AS1	0.17121	0.0914797	0.083414	0.059264	0.171482	0.0751161	0.121171	0.035648	0.0766809	0.118495	0.0447943	0.16632	0.0377842	0.146512	0	0.131932	0.177853	0.136165	0.151754	0.273549	0.0614234	0.083827	0.139032	0.200882	0.0902515	0.38948	0.0327873	0.0490576	0.353791	0.232175	0.110572	0.113551	0.0644701	0.125879	0.146344	0	0.314751	0.164488	0	0.112854	0.136487	0.168146	0.215536	0.354349	0.157077	0	0.387716	0.358395	0.185822
AL133330.1	0.0913443	0.189803	0.12362	0.0526978	0.152482	0.133587	0	0	0.170462	0.0421465	0.0398313	0.0739464	0.134391	0.130279	0.0948713	0.046926	0.474443	0.0908088	0.033735	0.0912154	0.054618	0.0248464	0.144233	0.750228	0.040126	0.173164	0.116619	0.0436223	0.120997	0.0917561	0.0983211	0.0673132	0.114654	0.167898	0.260259	0.187479	0.152661	0.0626842	0.109769	0.04014	0.169911	0.149516	0.159713	0.859332	0.139674	0.465453	0	0	0.495701
AC083805.2	0.0351401	0.0938792	0.171204	0.152046	0.140784	0	0.124349	0.073166	0.0786922	0	0.0459692	0	0.193876	0.0751776	0.0547454	0.0812358	0.109511	0.139736	0.0389335	0	0.0315173	0.0860257	0.142679	0.164921	0.115774	0.133232	0	0.251722	0.055857	0.0794216	0.113472	0.194215	0.132322	0.12918	0	0.0618196	0.0880926	0.289375	0.0844557	0	0.0840405	0.0862779	0.110595	0.264468	0	0.153479	0	0.220677	0
LINC01943	0.217988	0.0647077	0.047202	0.138336	0.0582225	0.191279	0.257129	0.257197	0.439342	0.110638	0.152088	0.158822	0.0160359	0.466356	0.203764	0.055993	0.16606	0.245605	0.096608	0.449872	0.0912398	0.0592946	0.0983438	0.136409	0.296851	0.192848	0.0556607	0.166563	0.173251	0.0985367	0.093855	0.128511	0.164169	0.0934915	0.0621093	0.345142	0.109295	0.199456	0.122246	0.11495	0.0926819	0.285448	0.365901	0.437492	0.199994	0.253891	0	0.456316	0.552049
MID1IP1-AS1	0.68411	0.863056	0.601794	0.592009	0.628098	1.56326	0.403473	0.534151	1.02132	0.394563	0.447467	0.276906	1.50976	0.670801	1.06579	0.966475	1.1252	0.396725	0.568471	0.967789	0.357922	0.511731	0.925897	0.401338	0.638602	0.432295	1.47386	0.449217	0.317167	0.858993	1.97897	0.3781	0.214672	1.30984	1.34006	1.05307	0.666942	0.821563	0.68508	0.676402	0.954396	0.279944	4.12672	1.23354	0.523034	0.62249	0.430338	0.358014	0.412499
AC106820.3	0.107987	0.528908	0.263059	0.233623	0.378556	0.177668	0	0.168632	0.120912	0.0373691	0.141266	0.524517	0.0595791	0.288781	0.168235	0.0416069	0.560886	0.322062	0.358934	0.21567	0.193708	0.220301	0.21923	0	0.142311	0.204714	0.2068	0.270744	0.0858256	0.122033	0.435882	0.358099	0.254145	0.198489	0.115379	0.0474937	0.315832	0.555789	0.0648841	0.213541	0.172174	0	0.566439	0.812722	0.247684	1.06121	1.42651	0.904202	0.195339
AC013652.1	0.0462826	0.0529916	0.134221	0.0114433	0.218536	0.065269	0.046794	0.289098	0.0518223	0.0503366	0.103792	0.0963447	0.0729578	0.0282902	0.0515032	0.0203799	0.0549468	0.0394383	0.06593	0.231086	0.106743	0.14028	0.00447431	0.0387885	0.0522802	0.175478	0.0126619	0.0805169	0.173412	0.0348684	0.122765	0.102319	0.0497943	0.0546884	0.162481	0.0290793	0.127076	0.0453729	0.317816	0.0348656	0.163398	0.0324673	0.298263	0.118182	0.333632	0.404292	0.0499096	0	0
AC138956.2	0.48717	0.97613	1.25268	0.210791	0.447282	0.712465	0.191548	0.676231	0.0909133	0.224781	0.531084	0.443678	0.268783	0.434265	0.316238	0.218988	0.927799	0.403595	0.26988	0.527022	0.254884	0.165643	0.329675	0.714502	0.37451	0.846578	0.583093	0.290815	0.129063	0.489366	0.688248	0.897509	0.382181	0.820833	2.29896	0.357102	0.983812	0.612912	1.17086	0.32112	0.194184	0.199354	0.766624	1.68047	1.11739	1.32986	0.766131	1.18976	0.734372
AL592148.3	0.234931	0.353496	0.401266	0.378564	0.162279	0.346539	0.028667	0.160241	0.244909	0.15699	0.211952	0.363975	0.518469	0.233971	0.366004	0.324616	0.496509	0.297983	0.969366	0.22651	0.334231	0.218153	0.449535	0.494265	0.32028	0.399293	1.02392	0.394612	0.296173	0.28685	0.359693	0.331325	0.167778	0.431821	0.588583	0.306411	0.203086	0.294643	0.214172	0.368451	0.316449	0.0397805	0.484428	0.967891	0.445943	0.548431	0.244606	0.830945	0.60082
AC120053.1	1.16497	1.76364	1.44259	0.504066	0.991799	1.27779	0.137415	0.667044	0.358712	0.80628	1.56208	1.59146	1.44617	1.15269	1.1797	0.987486	1.36144	1.15814	2.00063	0.727079	1.07099	1.09324	1.04457	0.751781	1.28578	1.82198	2.03575	0.563296	0.717565	1.27262	0.775882	0.869218	1.04186	2.2216	1.12025	0.435509	1.48457	1.13922	1.15495	0.95987	1.11445	0.929598	2.01655	4.65783	2.93922	2.9893	0.439693	3.17024	1.05366
LINC01186	0.136968	0.0914797	0.139023	0	0.205778	0.0751161	0.201952	0	0.0383404	0.023699	0.0895886	0.12474	0.188921	0.0732562	0.160038	0.0263865	0.0355706	0.340412	0.0379384	0.136774	0.122847	0.111769	0.11586	0.120529	0.0676887	0.19474	0.0327873	0.0981153	0.544293	0.0773917	0.110572	0.0757005	0.12894	0	0.219516	0.0602396	0.114455	0.305477	0	0.090283	0.10919	0.168146	0.107768	0.386562	0.314155	0.0747783	0.387716	1.3619	0.0619407
AC009095.1	0.113158	0.187145	0.196897	0.0279783	0.372398	0.124117	0.114409	0.0673172	0.0362008	0.0895056	0.126883	0.117779	0.0356756	0.103752	0.0755536	0.137027	0.201513	0.0803537	0.089553	0.225998	0.0579956	0.105532	0.0875157	0.303475	0.074563	0.0612907	0.0773939	0.0694798	0.0385438	0.0730727	0.143552	0.142952	0.0760903	0.415988	0.276354	0	0.0405253	0.0998409	0.194261	0.0639334	0.180419	0.277833	0.135672	0.273742	0.296623	0.388329	0.183039	0.270715	0.116968
AL031985.3	0.568928	0.63915	0.525938	0.355995	0.3682	0.49922	0.464596	0.464719	0.343013	0.284717	0.492353	0.41451	0.376669	0.496222	0.490898	0.553071	0.600095	0.382863	0.484881	0.585606	0.455321	0.371408	0.444234	0.605912	0.44409	0.481191	0.410665	0.219447	0.166955	0.520938	0.59354	0.503104	0.304871	0.450469	0.39278	0.500439	0.59244	0.432467	0.4628	0.444245	0.495412	0.494275	2.98427	1.44099	1.16439	1.20421	0.0991059	1.08101	0.759981
ADNP-AS1	1.24867	1.35907	1.22047	0.860447	1.25065	0.735522	1.09102	1.37216	0.621388	0.832199	1.17973	0.75813	0.561342	1.01413	0.756514	0.801842	0.912786	0.850553	0.87107	1.31618	1.07845	1.01895	0.860641	1.19377	1.05133	1.40274	0.309976	0.844776	0.955654	0.836198	1.00803	0.996845	1.21902	1.06257	1.65533	0.772912	0.908168	1.04731	1.38937	1.14315	1.05073	2.27096	1.30996	3.87215	1.16681	2.42388	1.57094	7.59952	0.585597
AC092718.4	2.72434	4.55891	2.69837	4.53378	2.57874	3.67775	3.7079	1.96353	2.34648	2.13416	2.85895	2.5811	1.91602	2.85014	1.7257	2.14549	3.91853	3.75005	2.68674	2.89987	1.71848	1.83225	2.91735	6.63889	2.11076	2.9512	0.945978	1.77998	1.40383	3.02231	4.44697	1.88627	3.21288	3.13659	2.20711	4.42408	3.07709	3.06114	1.33112	2.1707	3.38901	3.96927	4.05154	7.15374	8.23997	19.0252	5.76268	5.2642	7.74414
AC118344.1	0.117294	0.156679	0.0595271	0.0253757	0.14685	0.19298	0	0	0.0492499	0.0507372	0.11508	0.160234	0.275034	0.0941006	0.0913672	0.0564909	0.258921	0.0437274	0.0812225	0.336744	0.0394505	0.0598218	0.0198437	0.103217	0.038644	0.0555892	0.224622	0.0525138	0.0349584	0.0220917	0.213051	0.113447	0.0276048	0.269494	0.109658	0.0386901	0.122518	0.0603689	0.158571	0.0579861	0.0818178	0.0359983	0.153814	0.744833	0.134515	0.128075	0.166013	0.675214	0.0265218
ABALON	0.101376	0.240741	0.173783	0.146214	0.191793	0.210033	0.106292	0.222805	0.277469	0.187101	0.191559	0.259881	0.186439	0.144588	0.245678	0.147559	0.128712	0.212762	0.14976	0.168722	0.242466	0.165451	0.137206	0.237892	0.192976	0.042707	0.291209	0.306617	0.170095	0.0933472	0.109119	0.149412	0.190869	0.30021	0.168491	0.178345	0.197664	0.170057	0.175968	0.0742475	0.152654	1.02328	0.815369	0.498048	0.465041	0.565769	0.297596	1.72127	1.52817
LINC00513	0.305084	0.295309	0.441606	0.126266	0.969849	0.858397	0.297279	1.36711	0.846574	0.504923	2.51608	0.177178	0.775745	0.326344	0.12399	0.13288	1.7224	0.197801	0.470286	2.5167	0.154661	0.736045	0.116692	0.373522	0.0699226	0.125729	0.012701	0.104521	0.231931	0.229844	1.35995	0.131961	0.124871	0.719245	1.89912	0.816738	0.554213	0.209361	2.75762	0.201098	1.02572	0.814195	0.528794	0.736246	1.58205	2.665	0.951217	0.360967	0.119972
PPP1R35-AS1	0.282976	0.188998	0.114889	0.24488	0.991992	0.0775952	0	0.147298	0.237635	0.0489622	0.0925453	0.171809	0.156125	0.0756739	0	0.109029	0.146978	0.210988	0.156762	0.0706442	0	0.115458	0.0478737	0.249015	0.0932301	0	0.0677388	0.202707	0.281128	0.213189	0.228442	0.156398	0.0665978	0.195049	0.151174	0.0622277	0.177348	0.19419	0.170026	0.139894	0.281984	0	0.148433	0.332767	0.324523	0.308985	0	0.296178	0.25594
AL022328.3	0.505107	0.815279	0.487053	0.163914	0.94858	0.554023	0.111713	0.427251	0.212086	0.284039	0.412979	0.651687	0.243844	0.776688	0.245911	0.291922	0.623087	0.313841	0.384748	0.662017	0.198201	0.257613	0.299087	0.555607	0.208017	0.658311	0.15114	0.520127	0.150542	0.237836	0.662618	0.383854	0.505221	0.667305	1.88889	0.416531	0.527604	0.584929	0.493177	0.249708	0.402668	0.155021	0.563019	1.69285	0.579266	0.689414	2.62132	1.6521	0.513953
LINC00894	0.155944	0.274724	0.134885	0.0674745	0.298801	0.141299	0.055983	0.0494099	0.0569376	0.0680422	0.066522	0.139964	0.0897785	0.159558	0.079222	0.0574719	0.242992	0.104476	0.0939011	0.176035	0.0729737	0.0304303	0.0642353	0.143194	0.0848847	0.15424	0.0616752	0.0898524	0.0565814	0.0561884	0.186099	0.176124	0.0734019	0.311561	0.286149	0.0477115	0.104816	0.165175	0.211841	0.0491609	0.0702663	0.133176	0.295188	1.04926	0.311024	0.214696	0.319878	0.638683	0.0674559
SNHG4	1.50249	1.52631	0.957947	0.770493	0.914072	0.854514	1.95606	0.845816	0.436157	0.485275	0.829881	1.1082	1.10528	1.13098	0.589522	0.626069	1.65327	0.918335	0.653542	1.57816	0.608908	0.508591	0.579928	1.27972	0.557348	0.843941	0.362329	0.143505	0.1946	0.704321	0.799638	0.910371	0.628633	1.07399	2.68745	0.832126	0.98582	1.01579	0.869333	0.88033	0.62994	1.42094	1.80975	6.39731	2.65482	4.52071	1.13416	1.67742	1.16768
LINC00893	0.273594	0.386648	0.149716	0.102939	1.06037	0.300089	0.168375	0.0557272	0.106553	0.127609	0.116709	0.187779	0.1772	0.273572	0.101926	0.137497	0.203889	0.212862	0.131795	0.213814	0.128028	0.101923	0.124772	0.348925	0.125411	0.248054	0.0683403	0.102253	0.132358	0.125464	0.321699	0.262977	0.285554	0.256909	0.559225	0.12556	0.149102	0.179588	0.243009	0.101932	0.109054	0.0146031	0.224627	0.744182	0.327404	0.324717	0.875482	0.622517	0.0860707
AC078795.1	0.0477404	0.103248	0.105221	0.0413132	0.07514	0.0598443	0.0321786	0.0142002	0.0458182	0.0330413	0.0356872	0.0828162	0.090307	0.0364766	0.116876	0.0683211	0.134609	0.0542407	0.0453378	0.108967	0.0244677	0.0500881	0.036922	0.104027	0.0404452	0.103432	0.0522427	0.0635112	0.0325225	0.0411048	0.0770802	0.135697	0.0513627	0.106554	0.196747	0.0179971	0.085486	0.0421219	0.0737611	0.0674322	0.0434953	0.016745	0.0643935	0.404211	0.062571	0.0893628	0.180186	0.228424	0.148043
EBLN3P	8.09409	6.93414	7.87996	4.99006	8.19638	7.23872	7.56619	9.21471	8.21139	4.54929	8.62475	7.01819	5.71712	7.0418	7.27853	6.62195	7.41896	5.13434	7.10322	10.6151	6.32251	5.4502	5.73024	5.76875	6.67765	7.53419	5.41061	5.56836	3.90236	5.59476	7.53252	5.74173	5.93888	7.12883	9.655	4.83372	7.16708	7.71458	12.2219	5.95858	5.9702	7.72842	10.6351	16.5699	6.52199	5.6393	3.04496	9.31612	8.54088
AC009065.3	5.18049	8.72945	5.71794	8.32183	6.18298	7.4515	15.1486	10.6572	10.1076	7.06353	9.61762	6.5167	5.54525	6.03923	5.8477	7.81674	7.66945	9.83766	4.50243	7.83722	6.70529	8.12576	7.36832	8.04379	4.43558	7.88016	1.27723	2.88879	5.94177	9.48845	12.8469	4.32051	7.97236	8.75238	8.08724	17.7362	8.52837	6.76953	9.17035	8.5471	9.52094	6.77862	21.8368	13.3659	37.1407	19.3071	23.7676	1.03898	7.29484
AC092828.1	0.0318092	0.074358	0.019372	0.0103225	0.0238949	0.00436122	0.0093802	0.0165577	0.00890414	0.0385268	0.00520149	0.00965651	0.0307124	0.0510388	0	0.0275759	0.0536957	0.0197642	0.0264323	0.00794109	0.0427947	0.0194679	0.0188351	0.0279916	0.0340599	0.0527639	0.0114217	0.031331	0.0442421	0.0389423	0.0160494	0.0175806	0.0187156	0.0255797	0.012745	0.0104925	0.016613	0.0218288	0.0286689	0.0157254	0.0126791	0	0.012514	0.0411468	0.0182397	0.0955154	0.0900428	0.0665866	0.0575401
KDM4A-AS1	0.377424	0.58324	0.396609	0.345824	0.444734	0.292218	0.104751	0.184904	0.248587	0.192071	0.261389	0.363949	0.269479	0.189988	0.242116	0.273731	0.415131	0.308998	0.295177	0.421231	0.1593	0.135877	0.157752	0.247467	0.299896	0.37879	0.159437	0.174941	0.123516	0.326159	0.295727	0.380384	0.219452	0.428482	0.640472	0.205052	0.287559	0.342799	0.240115	0.182927	0.424772	0.218041	0.454178	0.46994	0.203688	0.775743	0.502766	0.534456	0.381524
AL157932.1	0.295254	0.631034	0.527446	0.459908	0.414013	0.388617	0.278615	0.55328	0.330594	0.245216	0.386243	0.501939	0.390957	0.442161	0.459982	0.318528	0.368053	0.352228	0.785106	0.766578	0.529629	0.48187	0.279725	0.623566	0.428011	0.223888	0.73505	0.296103	0.0938643	0.355902	0.381367	0.39164	0.333539	0.596969	0.441652	0.571363	0.592138	0.405231	0.49673	0.42816	0.84735	0.28997	0.681444	0.388869	0.812648	0.773739	0.445749	0.74167	0.106818
AC007128.1	0.0462719	0.0103015	0.00939326	0.0100106	0.0115864	0	0.0136451	0	0	0	0	0	0.0127647	0.0247482	0	0.0178283	0.0120168	0.0115002	0	0.0693099	0.0103754	0.00943977	0.0704541	0	0.0152449	0.0219297	0	0	0.0367758	0.0697207	0.0186773	0	0.03267	0.0425256	0.0370796	0	0.0386663	0.00793842	0	0.0152502	0.0553316	0.227219	0.0364074	0.968561	0.371459	0.378936	0	0.0484307	0.0209255
AC004067.1	0.826796	0.763551	0.42271	0.50349	0.306708	0.302289	0.108361	0.382554	0.480022	0.339098	0.72106	0.371845	0.337899	0.196536	0.333947	0.448344	1.01793	0.487081	0.30535	0.886787	0.549301	0.199907	0.373004	0.395222	0.464086	0.638562	0.351855	0.438715	0.194701	0.669033	0.271928	0.236942	0.547719	0.816142	0.883394	0.296293	0.63972	0.630424	0.551979	0.524802	0.366176	0.15037	0.289127	1.23875	0.70236	1.13684	0.693458	0.705116	0.720105
AC104035.1	0.00821597	0	0.00667141	0	0	0	0	0	0.0183987	0	0	0.00997667	0	0	0.0127998	0	0.00853476	0	0	0.0246131	0.00736893	0	0	0	0	0	0.00786695	0	0.00652985	0	0.0198979	0	0	0	0.00877838	0.0072269	0	0.0281907	0	0	0.00654972	0.0403446	0.0948118	0.00772927	0.452267	0.0538266	0	0.0343971	0
LINC01389	3.86105	2.56888	4.72081	1.99706	4.08944	0.4381	3.82144	3.64997	1.09322	3.83943	3.54144	2.80231	0.979416	4.03516	1.59022	2.97528	1.79797	4.54433	2.90107	2.08291	2.58729	2.28155	5.34579	3.07221	3.65537	6.56229	0.424945	0.381492	5.43189	4.68089	1.75553	5.83771	3.46764	1.95776	5.3108	1.24919	3.07807	2.92371	2.34658	2.60353	3.21952	0.871711	4.14368	2.25455	1.62866	1.84144	1.17251	1.39351	1.44503
LINC01814	0.260883	0.217402	0.272086	0.0911326	0.261297	0.183764	0.163744	0.281562	0.117915	0.140802	0.303707	0.127879	0.0897944	0.143371	0.126778	0.138326	0.275978	0.128487	0.0928128	0.325046	0.163147	0.150388	0.105278	0.109521	0.134052	0.145193	0.00458349	0.13716	0.0817959	0.147859	0.13332	0.129636	0.191517	0.296952	0.278741	0.0778958	0.230002	0.229945	0.253103	0.126211	0.169814	0.170417	0.0602616	0.432314	0.142731	0.141124	0.406505	0.250508	0.25111
AC112496.1	0.0762828	0.373623	0.0929131	0.330064	0.267414	0.167341	0.17996	0.0794151	0.170826	0.343171	0.0997909	0.0926304	0.084174	0.244795	0.237685	0.146957	0.316971	0.0758356	0.169035	0.114263	0.0342091	0.0933731	0.154865	0.313262	0.226191	0.361528	0.0365211	1.03824	0.0303138	0.086205	0.246328	0.379445	0.143624	0.140213	0.366771	0.0335498	0.223105	0.287916	0.137504	0.150846	0.273655	0.187294	0.160054	0.825285	0.174965	0.999528	0	0.159683	0.206983
AC005229.4	0.789933	0.677399	0.934429	0.447284	0.644672	0.919916	0.72471	0.893438	1.04827	0.458971	0.650638	0.888164	0.699472	0.813684	1.00275	0.563624	0.688884	0.581705	1.03728	0.808295	0.734734	0.795809	0.607155	0.732316	0.629749	0.53614	1.23261	0.398197	0.356539	0.573079	0.873886	0.549775	0.624286	0.83353	0.708549	0.609056	0.82308	0.555469	1.05474	0.527116	0.792993	1.0296	1.10494	0.568822	1.56577	0.575024	0.33127	1.44943	0.17641
AC010542.6	1.12227	1.34921	1.36694	0.922625	1.23646	0.984769	0.198568	1.05152	0.628301	1.12626	1.54153	0.681391	0.309593	1.2605	0.524524	1.42694	1.45728	1.72933	0.746056	1.84914	0.805258	1.14476	0.949327	1.25094	0.887395	1.59564	0.64476	1.84904	1.15954	0.549575	0.951295	0.930402	0.52825	0.77356	1.55883	0.888455	1.35982	1.19373	1.14634	0.702766	0.849938	0.688868	0.529814	7.97124	1.28705	3.79882	0.847157	2.46673	2.84214
AL360270.1	0.227167	0.202297	0.28038	0.149403	0.154719	0.169433	0.203647	0.170276	0.122091	0.194956	0.166417	0.231713	0.160427	0.174958	0.212344	0.238071	0.188785	0.207768	0.231555	0.23592	0.228196	0.148299	0.209069	0.330507	0.215548	0.378968	0.139211	0.143201	0.137215	0.225909	0.139375	0.231016	0.111203	0.192073	0.174756	0.14387	0.280945	0.14342	0.218389	0.167707	0.260778	0.0892404	0.791214	0.512903	0.500197	0.416717	0.102887	0.171191	0.016437
AC083843.3	0.370227	0.760131	0.796104	0.471676	0.611159	0.428641	0.226439	0.339035	0.318582	0.510098	0.713027	0.466218	0.412309	0.370358	0.432588	0.449072	1.06475	0.337385	0.395001	0.657252	0.328983	0.268547	0.366529	0.88085	0.32301	0.838319	0.377476	0.415001	0.36236	0.317661	0.982425	0.894265	0.377572	0.866384	1.81303	0.38898	0.581508	0.477548	0.502575	0.438363	0.49737	0.353501	0.51427	0.835264	0.50321	0.943262	0.194075	1.04768	1.07897
LINC00630	0.236595	0.229421	0.128077	0.127395	0.273833	0.271041	0.3659	0.224415	0.494504	0.130998	0.254483	0.140456	0.30168	0.129353	0.262112	0.149905	0.26216	0.146351	0.227184	0.309764	0.179193	0.133002	0.149433	0.240586	0.0970033	0.199341	0.221509	0.116754	0.0919304	0.126752	0.212221	0.180162	0.163334	0.202943	0.308966	0.189614	0.175739	0.263385	0.328543	0.103968	0.192803	0.335631	0.557089	0.410535	0.313538	0.275563	0.238126	0.198106	0.237766
AL513218.1	0.274111	0.390563	0.0890318	0.0474415	0.109819	0.120263	0	0.0570732	0.184152	0.0758852	0	0.133141	0.241973	0.351855	0.0854084	0.126736	0.341696	0.327005	0.0607403	0.10949	0.14751	0.0894726	0.111297	0.450264	0.0361237	0.207855	0	0.196356	0.0871426	0.123906	0.3098	0.121198	0	0.251918	0.175725	0.337557	0.0916223	0.188106	0.13176	0.144545	0.21852	0	0.402592	0.876768	0.754453	1.31694	0	0.688558	0.396674
AC036108.3	0.216196	2.38164	0.715215	0.408826	0.74586	1.6248	0.20779	0.916967	1.68555	0.210591	0.104749	2.22662	5.56643	0.119914	3.75488	0.160428	3.36877	0.23085	3.21154	0.223887	0.890536	1.3591	0.677331	0.385196	0.168838	0.607183	8.91685	1.72651	0.871865	0.253366	2.75373	0.398297	0.0753797	0.596077	0.290884	0.563466	0.187352	0.164848	0.57734	0.158341	0.395768	0.0589797	0.117604	0.105461	0	0.122405	0.0604434	0.0502851	0.0434533
AC007608.1	0.0173637	0.0386569	0.0775467	0.022539	0.104348	0.0190452	0.0307222	0.00903833	0.00972099	0.0240349	0.0795013	0.0632543	0.0574797	0.0185737	0.067628	0.0468309	0.0992057	0.0258928	0.0288572	0.0260088	0.0467206	0.0425076	0.0235006	0.061119	0.0629275	0	0.0498782	0.0373148	0	0.0130815	0.0210261	0.0191934	0.016346	0.0398947	0.0371046	0.0305468	0.00725483	0.0655362	0.0625978	0.017168	0.0207633	0.106581	0.118404	0.220524	0.159304	0.322313	0.0655354	3.98006	0.0157047
AC018926.2	0.172172	0.191654	0.209707	0.148993	0.172446	0.141635	0.253859	0.134432	0.38556	0.148951	0.112615	0.261337	0	0.0920851	0.201173	0.165843	0	0.128372	0.190759	0.0859647	0.154422	0.140497	0.0873838	0.353521	0.0850865	0.163196	0.0412146	0.0308334	0.0684192	0.0648557	0.590716	0.0951576	0.0405203	0.197791	0.137969	0.0757228	0.0359682	0.0295379	0.2069	0.255349	0.240196	0.105682	0.0451559	0.24296	0	0.187997	0.324914	0.180205	1.09006
AC009054.2	0.458512	1.37807	0.372315	0.297588	0.229621	0.188594	1.3521	0.23867	0.128348	0.119002	0.299906	1.04395	0.82216	0.429156	0.267872	1.14831	0.952607	0.341869	0.381007	0.286166	0.10281	0.327388	0.620565	1.07596	0.415423	0.325955	0.164638	0.410563	0.182207	0.0431793	1.11045	0.443475	0.809324	0.0526738	0.4899	0.403315	0.431042	0.904619	0	0.415567	0.411214	1.82937	0.481019	0.215675	1.57749	1.12647	1.29792	0.359928	2.69558
AL157394.1	0.647967	0.857747	0.839001	1.04569	1.12259	0.653093	0.619714	0.601647	1.05887	0.412099	1.09966	0.637969	0.483107	0.674388	0.572948	0.539802	0.855031	0.835678	0.659707	0.682029	0.565457	0.9289	0.639958	0.452051	0.600055	0.896377	0.620441	0.250899	0.570663	0.620103	0.735159	0.464593	0.494587	0.724264	1.01042	0.878051	0.848779	0.480716	1.95718	0.611807	1.3961	0.171992	0.128606	0.741385	0.16067	0.191222	0	0.256615	0.823649
AL031673.1	0.41399	0.614445	0.224108	0.19903	0.506792	0.655896	0.325549	0.383101	0.463541	0.191016	0.180523	0.446852	0.76136	0.393634	0.358312	0.212677	0.668971	0.228646	0.662539	0.505273	0.165026	0.412899	0.186769	0.107942	0.424337	0.348805	0.704716	0.955571	0.0731175	0.311892	0.557012	0.355922	0.476332	0.338197	0.442329	0.161845	0.192191	0.126265	0.718599	0.242563	0.84341	0.112939	0.482567	0.519287	0.633028	1.40635	1.21529	3.17756	0.582455
AC004908.1	0.911304	0.952674	0.418252	0.171438	0.396849	0.651886	0.140209	0.123747	0.266186	0.21938	0.414658	0.48113	0.568369	0.42383	0.0617277	0.183193	0.864345	0.196948	0.438992	0.712188	0.319833	0.161663	0.214502	0.464889	0.182755	0.600898	0.189694	0.113531	0.062981	0.328354	0.895613	0.30658	0.186499	0.582624	0.973687	0.278817	0.0662187	0.407853	0.809433	0.208936	0.315864	0	0.498802	1.26734	1.09054	0.259582	0	0.746468	0.358363
PABPC4-AS1	0.194514	0.173219	0.379072	0.134661	0.155859	0.256022	0.0917762	0.0405003	0	0.0269248	0	0.0472398	0.0858545	0.249683	0	0.299781	0.282886	0.0773496	0.0862049	0.349631	0.104676	0.0634914	0.0526523	0.319516	0.0769022	0.294996	0.0372502	0.250808	0.061838	0.0293086	0.188434	0.38702	0.219737	0.178766	0.789752	0.102659	0.227559	0.213574	0.140249	0.102572	0.0930394	0	0.489749	0.914957	0	0.679655	0	0.651485	0.140744
AC018682.1	0.0282231	0.175933	0.103128	0.0488469	0.07067	0.108347	0.0332908	0.044073	0.110604	0.0195333	0.055381	0.0856785	0.0622855	0.181139	0	0.0326227	0.175909	0	0.0312699	0.155008	0.0126567	0.057577	0.0381981	0.18213	0.0464923	0.0802549	0.0540484	0.0202173	0.0336466	0.0637883	0.136705	0.0467957	0.026569	0.0389072	0.196008	0.0372383	0.0825445	0.0677875	0.0339157	0.0837153	0.0224993	0.0346475	0.133238	0.132756	0	0.0308171	0.053261	0	0
AL049780.1	0.175341	0.4294	0.249162	0.151735	0.043905	0.192322	0.0517062	0.0912705	0.0981641	0.0910157	0.0573441	0.212917	0.0967399	0.14067	0.0682918	0.168895	0.227681	0	0.242837	0.218867	0.117948	0.107312	0.0889921	0.257162	0	0.0830997	0.251839	0.219806	0.0348392	0.132099	0.389263	0.145363	0.0412661	0.483435	0.421524	0.0385583	0.256411	0.0300816	0.0526769	0.173366	0.104836	0	0.229935	0.0824771	0	0.478642	0.165447	0.183522	0.555059
ZNF667-AS1	0.685179	1.29923	0.988035	0.449812	0.922912	2.66276	1.0451	2.33057	3.53833	0.46195	1.80039	1.7501	3.10245	0.366463	3.05512	0.791987	1.44807	0.622441	2.97768	0.819874	0.810556	0.756745	0.755464	0.734624	0.790093	0.795023	4.51898	1.03665	0.769899	0.623001	1.96935	0.594152	0.439281	0.694847	0.713149	1.16902	0.804542	0.571534	2.39916	0.595696	0.630979	0.652612	0.904711	0.622363	0.270957	0.128992	0.111468	0.43276	0.213695
AC068620.2	0.191388	0.340871	0.124327	0.0331243	0.383385	0.167938	0.135452	0.0398493	0	0	0.0500736	0.278884	0.126712	0.16378	0.238534	0.206474	0.159051	0.152213	0.296868	0.114671	0.137325	0.249884	0.103612	0.0449116	0.100888	0.290255	0.219909	0.0822592	0.0608442	0.173026	0.247207	0.296178	0.108103	0.24625	0.408979	0	0.223902	0.183874	0.183993	0.0756926	0.152573	0.0939813	0.120469	0.576162	0.52677	0.334366	0	0.480761	0.0692408
AL391684.1	0.328896	0.311991	0.238037	0.117559	0.214839	0.384275	0.20241	0.14887	0.248177	0.128661	0.1403	0.408062	0.220908	0.367112	0.345309	0.187328	0.25253	0.149268	0.221809	0.356991	0.205209	0.151698	0.120962	0.176171	0.155472	0.298194	0.602464	0.189505	0.113652	0.166985	0.357865	0.260811	0.161541	0.367978	0.496558	0.125784	0.30471	0.289488	0.412419	0.164952	0.091198	0.280878	0.262531	0.558289	0.557577	0.437196	0.296844	0.658547	0.194004
DLGAP4-AS1	0.0791625	0.148825	0.0857073	0.0532816	0.0616688	0.12542	0.0830015	0.0640991	0.0689404	0.0304382	0.0345194	0.0961273	0.00970575	0.0940877	0.068516	0.0271119	0.118783	0.113676	0.12669	0.0878342	0.023667	0.0574211	0.0595229	0.0928824	0.028979	0.066698	0.134755	0.0189024	0.0209721	0.0795194	0.0923097	0.0583363	0.0165606	0.113172	0.112775	0.0541588	0.0441005	0.0784689	0.0845597	0.0579782	0.0631079	0.172768	0.0830483	0.231694	0.322792	0.153668	0.49797	0.515547	0.0954654
THAP9-AS1	3.04201	5.23128	3.45581	2.62825	4.91207	2.99439	3.50197	3.46128	3.50437	3.65406	4.10064	2.37382	3.76015	4.83927	3.95693	4.37273	5.59591	3.96923	3.13815	5.69085	3.63785	2.52214	4.03468	4.30138	3.36325	6.98672	1.89985	1.9172	1.80166	2.97125	3.79778	4.48342	3.69438	4.49825	7.40682	2.03258	4.30593	4.8442	4.56363	3.01416	3.39277	5.11094	2.3219	13.5019	3.9359	6.17478	2.66796	7.12303	8.23646
AL008729.1	0.158272	0.263505	0.14528	0.0297747	0.137846	0.143408	0.137988	0.0573114	0.0616401	0.10954	0.09002	0.208901	0.0835255	0.117774	0.0857649	0.0901461	0.243045	0.102615	0.14486	0.219893	0.0740631	0.0786152	0.107105	0.129184	0.149632	0.143497	0.0724795	0.123235	0.0601606	0.103686	0.122215	0.0836715	0.0647805	0.113836	0.21322	0.108953	0.218511	0.0991678	0.148848	0.0861819	0.0822868	0.0844776	0.122726	0.265423	0.0947002	0.135249	0.311667	0.273692	0.0871345
AC022211.2	0.418545	0.985055	0.655446	0.336325	0.359323	0.295121	0.17632	0.124494	0.23432	0.268985	0.273764	0.980176	0.197932	0.351773	0.232878	0.368601	0.683233	0.534974	0.264987	0.328392	0.294952	0.12198	0.18208	1.22771	0.27579	0.680096	0.114504	0.406898	0.213846	0.337846	0.820577	0.826159	0.253295	0.604463	0.638851	0.131485	0.424696	0.656509	0.107778	0.177355	0.40516	0.734024	0.595907	0.984377	0.137141	0.522301	0	0.187745	0.648952
RPARP-AS1	1.72317	1.66268	1.62064	0.930759	1.6766	1.12987	1.88516	2.2631	1.66227	0.815169	2.5465	1.47161	0.810718	1.36927	1.14462	1.36288	2.03001	1.15962	1.19586	2.01194	1.20924	1.03839	0.984134	1.37306	1.07555	1.63692	0.413398	1.12043	0.668211	1.19834	1.13121	0.816321	1.27278	1.702	1.90992	0.929424	1.46842	1.4346	2.42571	1.12335	1.35257	1.29249	1.16411	2.44411	2.76228	1.22404	2.00115	2.34661	3.30203
AL136304.1	0.29479	0.45003	0.444547	0.145773	0.253079	0.415721	0.0496745	0.175369	0.188614	0.174879	0.220363	0.46024	0.232347	0.270285	0	0.194711	0.218735	0.125598	0.233295	0.336428	0.188856	0.137461	0.227988	0.197646	0.194245	0.159669	0.0806478	0.271504	0.133881	0.0951811	0.0339971	0.186202	0.277513	0.46444	0.404961	0.11113	0.351909	0.317895	0.202428	0.166553	0.0335722	0.723785	0.0883601	0.8716	0.57955	0.275901	0.158946	0.881553	0.152357
AC006449.2	0.617482	0.43205	0.573028	0.229008	0.530112	0.628904	0.260127	0.688754	0.79016	0.152629	0.173094	0.160674	0.146006	0.235897	0.137427	0.373863	0.687259	0.394626	0.34207	0.616611	0.395587	0.46789	0.179083	0.25875	0.261562	0.0836126	0.295626	0.315947	0.210326	0.166143	0.249242	0.195014	0.49825	0.445885	0.471251	0.193981	0.405419	0.33294	1.00704	0.348871	0.281288	0.541456	0.786605	0.705383	0	0.0963194	0.998808	0.553963	0.159567
AC004832.5	0.053455	0.0952058	0.0434058	0	0.05354	0.175895	0	0.1113	0	0.0739928	0	0.0649105	0.0589848	0.17154	0	0.123576	0.111058	0.159425	0.0592256	0.106759	0	0.0436207	0.0361739	0	0.105669	0	0.204737	0.650962	0.0424847	0.080544	0.12946	0.177264	0	0.0982543	0.342685	0	0.0446688	0.256781	0.192711	0.0704703	0.0852281	0	0.224316	0.150865	0	0.583681	0	0.223796	0.386782
AP002336.2	0.119307	0.247906	0.0968779	0.103245	0.278825	0.261722	0.187639	0.124206	0.044529	0.0825727	0.208098	0.144875	0.131649	0.127621	0.18587	0.153228	0.20656	0.118607	0.0881241	0.238277	0.214013	0.194715	0.134561	0.279968	0.104819	0.603128	0.114239	0.113952	0.12643	0.179767	0.128419	0	0.187191	0.109647	0.212456	0.104944	0.0996967	0.24562	0.191161	0.183497	0.0951107	0.488215	0.0834421	0.299305	0.364862	0.173697	0	0.998984	0.50357
AC131159.1	0	0.268856	0.163434	0.261262	0.100796	0.110382	0	0.314305	0.112681	0.208952	0.131649	0.122203	0	0.107649	0	0	0	0	0.1115	0.301482	0	0	0.136204	0.354232	0.0663116	0.190778	0.0963609	0.216268	0	0.151634	0.406209	0.333722	0.189475	0.277465	0.21505	0.177042	0.336379	0.276242	0.362803	0.199004	0.160453	0	0.105576	0.189349	0.461645	0.439542	0	0.421324	0.182042
AL138999.1	0	0.190507	0.138968	0.259176	0.0857067	0.281573	0.302806	0.178169	0.143719	0.0296119	0.111941	0.0519544	0.0472114	0	0.133312	0.362669	0.133336	0.0425345	0.142212	0.0854499	0.0767486	0	0.115814	0	0.169154	0.162218	0.0409678	0	0.0340047	0.128935	0.20724	0	0.0805554	0.235928	0.0914284	0.0752694	0.107259	0.0880832	0.154246	0.141011	0.0682165	0.105049	0	0.322006	0.196268	0.0934356	0	0.179126	0.386975
AL512656.2	0.053455	0.190412	0	0	0.10708	0.0586318	0	0	0.0598532	0.0739928	0.0699283	0	0	0.05718	0	0	0.166587	0.159425	0	0.106759	0	0.130862	0.0723477	0.313597	0	0	0.0511842	0	0.0424847	0	0.12946	0.177264	0	0.196509	0.114228	0	0.0446688	0.0733661	0.0642369	0.105705	0.042614	0.131246	0.112158	0.653749	0	0.116736	0.201754	0.111898	0.290086
AC211476.4	0.0605521	0.161769	0.0491687	0	0.0606484	0.0332081	0	0.0315193	0.0338999	0.0419083	0	0.0367643	0	0.161929	0.0471677	0.0233304	0.125803	0	0.0670889	0.0302333	0	0.0247061	0.0204883	0.10657	0	0.0573951	0	0.0867516	0.0240627	0	0.0488828	0.167332	0.0285016	0.111299	0.129394	0.0266313	0.0252997	0.0623301	0.109148	0	0.0482718	0.148671	0.0952866	0.170895	0	0.132235	0	0.316886	0.0547668
UBR5-AS1	2.73973	1.90482	2.35033	0.842807	1.53158	1.42765	2.80221	1.91412	1.51854	1.14653	2.33379	2.08896	1.46638	2.24911	2.3823	1.84468	1.23864	1.60163	2.87414	2.05417	1.91031	1.52265	1.65692	1.64466	1.84726	2.62277	1.02842	1.04975	0.947671	1.84463	1.42551	1.46894	1.85939	2.451	1.97421	1.48118	2.0232	2.29237	2.47199	1.61392	1.75599	3.10637	1.80474	2.37193	1.83717	2.18651	0.137416	2.4579	1.11961
AL359091.3	0.261864	0.433078	0.151882	0.0647456	0.56203	0.287224	0.308884	0.350507	0.376981	0.129455	0.244688	0.317982	0.165116	0.320128	0.524524	0.144136	0.58291	0.185949	0.414476	0.448277	0.234867	0.0915806	0.126577	0.351141	0.271148	0.141835	0.39402	0.267976	0.118928	0.140917	0.271799	0.0413512	0.140867	0.343804	0.31976	0.296152	0.312603	0.102687	0.224773	0.32056	0.178934	0.0918491	0.627927	0.809442	0.343212	0.98034	0.282386	0.704781	0.0676699
AC004253.1	0.483176	0.74321	0.642014	0.266081	0.307965	0.626327	0.0518122	0.36583	0.344278	0.182404	0.287308	0.533384	0.290814	0.281916	0.0684318	0.169241	0.501924	0.393009	0.194668	0.263179	0.11819	0.17922	0.237799	0.566917	0.405207	0.41635	0.336473	0.377583	0.0349106	0.364016	0.283681	0.242769	0.248104	0.322951	0.797844	0.309098	0.440463	0.301432	0.580633	0.144767	0.385185	0.323542	0.184325	0.950431	0.402993	0.671473	1.65786	1.10339	0.635654
AL731563.4	0.149799	0.120694	0.0868838	0.141977	0.0428676	0.109537	0.0504845	0.0519832	0.0718835	0.103676	0.149304	0.0952813	0.0629695	0.0915641	0.0444522	0.0879491	0.118561	0.0992803	0.102743	0.163834	0.083172	0.0232837	0.0627535	0.117174	0.108107	0.0676135	0.122944	0.122636	0.0566934	0.080611	0.109413	0.0473096	0.0940126	0.124559	0.0990803	0.0250981	0.101333	0.0832174	0.180013	0.136356	0.108045	0.192654	0.119734	0.335535	0.392667	0.0467333	0	0.313575	0.0516138
Z94721.1	0.111353	0.247906	0.361677	0.192723	0.44612	0.183205	0.0656736	0.115925	0.0623406	0.0385339	0.509841	0.405649	0.122872	0.0595563	0.0867395	0.34323	0.404858	0.16605	0.246748	0.333588	0.199746	0.272601	0.0376772	0.587933	0.293493	0.211095	0.106623	0.358949	0.221252	0.0838912	0.314628	0.246174	0.209653	0.460519	0.178463	0.048974	0.325676	0.30566	0.133813	0.293596	0.221925	0	0.876142	0.62854	0.510807	1.09429	1.26083	0.349644	0.201428
AC010655.2	0.0323799	0.028835	0.0262926	0	0.0648626	0.142063	0.0763877	0.0337094	0	0.0896408	0.0847167	0.0786378	0.0714589	0.0692724	0	0.0748547	0.0336362	0.0643801	0.215252	0.0970024	0	0.0528456	0.0438239	0.0379917	0.0213359	0	0	0.0231949	0.0257347	0.0243944	0.0261398	0	0.0609642	0.17855	0.103789	0.0284819	0.0541153	0.155543	0.0778218	0.0213433	0.129065	0	0.237785	0.0913852	0.297071	0.77783	0	0.135562	0.117145
AL157838.1	0.325559	0.488282	0.500884	0.400352	0.145876	0.112764	0.0404226	0.214059	0.134299	0.34391	0.403471	0.572183	0.0567216	0.265766	0.106778	0.303687	0.774278	0.281064	0.123398	0.205326	0.20747	0.0559293	0.226108	0.623233	0.186293	0.308585	0.0492203	0.0797824	0.0612819	0.264633	0.24207	0.710259	0.137108	0.480296	0.320383	0.135647	0.171819	0.352755	0.247089	0.214593	0.116107	0.21035	0.656114	0.910759	0.432308	1.15999	0.064671	0.699429	0.247961
AL136115.1	0	0.0738444	0.0673335	0	0.0415271	0.0454765	0	0	0	0	0	0.0503465	0.228751	0.0443504	0.0645932	0.0319496	0.25842	0	0.0459371	0.0414027	0.0371867	0.0338334	0.056115	0.048647	0	0.157198	0.0396999	0.0297003	0	0	0.066942	0.229151	0	0.0762089	0.132898	0	0.0346464	0.0569048	0.049824	0	0.0661053	0	0.217482	0.195026	0	0.090544	0	0.0867912	0.0749997
AL031716.1	0.404443	0.576265	0.295569	0.174996	0.810171	0.354888	0.286238	0.08421	0.135855	0.111966	0.26454	0.245558	0.312397	0.259576	0.189027	0.15583	0.378122	0.522693	0.179241	0.726969	0.435295	0.132014	0.273693	0.427084	0.239848	0.61337	0.348535	0.289718	0.225009	0.274229	0.3918	0.312943	0.0380738	0.371698	0.432128	0.320179	0.371762	0.277545	0.0972038	0.26659	0.451387	0.099301	1.10317	1.90242	0	0.971554	0.457944	2.70919	0.292641
AC099518.4	0.184788	0.137132	0.225074	0.186562	0.339317	0.135123	0.145312	0.128251	0.0689687	0.213154	0.0805783	0.112195	0.101952	0.0329442	0.0479809	0.166129	0.0639861	0.153088	0.102368	0.153773	0.165737	0.0753961	0.0416831	0.361358	0.121762	0.350308	0.0294898	0.154433	0.122388	0.0464054	0.0497256	0.272348	0.202951	0.113218	0.098719	0.352177	0.102943	0.105675	0.11103	0.0406014	0.12276	0.226851	0.387718	0.63742	0.141279	0.201773	0	0.322349	0.389977
AC027277.2	0.0985538	0.219411	0.0400132	0.0852856	0.0493553	0.0540491	0	0.0513003	0	0.0682094	0	0.179511	0.0543745	0.105422	0	0	0.102378	0.0979761	0	0	0.0441966	0	0.0333465	0.0578172	0.0649396	0.0934155	0	0.035299	0	0.148497	0.0397805	0	0	0.0452873	0	0.0433448	0.0823548	0.101447	0	0.129924	0	0	0.0516957	0.0927157	0.452094	0.215224	0.929925	1.34097	0
AL137782.1	0.256528	0.269564	0.116649	0.284149	0.421374	0.17445	0.393366	0.336497	0.114893	0.227256	0.228196	0.230512	0.266081	0.208547	0.127888	0.249074	0.266481	0.249923	0.119373	0.230549	0.151853	0.28888	0.225675	0.373224	0.250168	0.204249	0.117903	0.191111	0.110096	0.270568	0.256793	0.243861	0.154555	0.301771	0.263125	0.347495	0.325832	0.271101	0.246616	0.223201	0.265853	0.314921	0.355238	0.183412	0.44717	1.04199	0.193642	0.128878	0.658931
LINC01572	0.0315758	0.0682889	0.0622679	0.0195177	0.09036	0.103901	0.047887	0.0281763	0.0454567	0.0312196	0.0354056	0.0492976	0.0149324	0.0627271	0.042165	0.048664	0.0843454	0.0313907	0.0299867	0.108107	0.0121373	0.0294476	0.0213679	0.0846818	0.029723	0.0769616	0.021596	0.0420066	0.00717019	0.0305854	0.0801135	0.0498616	0.0382181	0.087058	0.101212	0.039678	0.0640797	0.0154776	0.0921513	0.0327067	0.0503441	0.0332257	0.151432	0.216424	0.144847	0.315227	0.102151	0.103868	0.0897566
AL606834.1	0.192534	0.400064	0.364791	0.277689	0.3214	0.492753	0.378508	0.367473	0.323368	0.310925	0.377801	0.194829	0.49572	0.240276	0.399937	0.272002	0.333341	0.191405	0.604402	0.192262	0.316588	0.366597	0.434303	0.941261	0.465174	0.669152	0.36871	0.298826	0.204028	0.410979	0.751244	0.354704	0.120833	0.383383	0.514285	0.338712	0.536292	0.220208	0.385614	0.211516	0.153487	0.315147	1.07725	0.694326	0.294402	0.910997	0	0.335861	1.45116
AC025580.2	1.01496	0.766301	1.30789	0.706471	1.18784	0.526374	0.487989	1.18297	0.772038	0.641372	1.55143	0.797083	0.438242	0.831965	0.489835	1.16467	1.03142	0.828044	0.745608	1.21182	1.03895	0.684191	0.903341	0.582487	0.777822	0.805186	0.0264087	0.331915	0.780359	0.67738	0.55663	0.609734	1.293	1.40931	1.39091	0.611356	0.797428	0.923627	1.08047	0.650834	1.0114	0.352128	0.0868025	0.342494	0.354253	0.325245	1.02014	0.0230937	0.189584
Z93930.3	0.114475	0.280342	0.139432	0.148595	0.20065	0.094171	0.540119	0.178763	0.192265	0.118843	0.262068	0.104256	0.189476	0.244904	0.0891714	0.242587	0.327021	0.142255	0.0634164	0.17147	0.0770048	0.070061	0.135568	0.235051	0.169719	0.108507	0.0822091	0.0410015	0.181964	0.0646825	0.346552	0.126538	0.107766	0.315621	0.183467	0.276909	0.167403	0.274951	0.0687824	0.0754568	0.136888	0.140533	0.0600471	0.188464	0	0.124997	0.216031	0.359447	0.414151
MIR3936HG	1.8757	1.84407	1.99828	0.629791	2.555	0.485534	1.34519	1.53093	0.52085	1.00738	1.75687	1.61258	1.01003	1.18779	0.724701	1.48586	1.73804	0.909974	1.40485	1.65578	1.1036	0.838778	1.13731	1.68139	1.30516	1.89169	0.42386	0.704064	1.07334	1.42442	1.04784	2.65389	1.568	1.66178	2.73359	0.501568	1.91222	1.69393	1.59585	1.09295	1.25605	0.184213	0.401425	1.80693	0.378591	0.475158	1.98223	0.785282	0.380013
AC005632.3	0.207106	0.161378	0.315321	0.224029	0.207435	0.198767	0.152683	0.323415	0.115947	0	0.27093	0.0628723	0.0285663	0.553845	0.0806635	0.159594	0.161356	0.257365	0.315512	0.232665	0.208973	0.105627	0.297823	0.212625	0.170584	0.049077	0.049577	0.185447	0.205753	0.234044	0.146294	0.0572325	0.219338	0.118961	0.0829812	0.318804	0.0865322	0.142125	0.15555	0.170644	0.185742	0.0635623	0.162954	0.219192	0	0.621888	0	0.27096	0.936591
AC108463.2	0.156083	0.138996	0.0422469	0	0	0.114133	0.184109	0	0.174765	0.0720173	0.204184	0.126355	0.05741	0	0.0810551	0.0801842	0.108093	0.0517228	0.172933	0.207818	0.0466639	0	0	0	0	0	0.199271	0	0	0.0783935	0.126004	0.172531	0.097957	0.239078	0	0.0457645	0.0434761	0.0357036	0	0	0.0414763	0.127742	0.491235	0.538404	0	0.454478	0	0.762372	0.0941138
CRTC3-AS1	0.335979	0.199465	0.109127	0.0969155	0.112171	0.22111	0.237784	0.349775	0.0501591	0.0465064	0.0879036	0.081596	0.0247157	0.0958377	0.209371	0.155341	0.0465354	0.111337	0.0496331	0.201303	0.140626	0.219334	0.166732	0.0788417	0.059036	0.127385	0.128683	0.0481349	0.106811	0.168747	0.0723282	0.0990355	0.168687	0.0823406	0.215387	0.0788087	0.18717	0.169079	0.107666	0.147642	0.124992	0	0.0704942	0.126431	0.205497	0.146744	0.338155	0.187549	0.121551
AL080317.2	0.357672	0.499891	0.403377	0.167656	0.35824	0.277886	0.0996138	0.129291	0.088996	0.285365	0.214452	0.24129	0.224744	0.223181	0.185741	0.31007	0.521202	0.261743	0.412795	0.292678	0.209409	0.320246	0.17817	0.373032	0.274959	0.621543	0.242588	0.494635	0.161875	0.284433	0.284732	0.345941	0.205766	0.346975	0.440541	0.0611749	0.336242	0.303402	0.17312	0.245584	0.257412	0.146363	0.354382	0.696334	0.22788	0.303758	0.206243	0.727919	0.143777
AC012676.3	0.0895009	0.438364	0.14535	0.0387257	0.358573	0.0981685	0.950142	0.23294	0.250534	0.0619439	0.0585412	0.217362	0.395038	0.287213	0.209153	0.137937	0.185947	0.222441	0.446232	0.268124	0.0802736	0.182588	0.0605667	0.262531	0.176923	0.254504	0.0428494	0.160282	0.177833	0.235999	0.180632	0.197864	0.252766	0.411273	0.239069	0.157453	0.336554	0.0921288	0.32266	0.0589949	0.107024	0.109874	0.187788	0.294696	0.410565	0.195454	2.36461	0.187353	0.971395
AD001527.1	0.169674	0.503661	0.367403	0.195774	0.509831	0.12407	0.0667133	0.294402	0.189982	0.19572	0.29595	0.137357	0.124817	0.120998	0	0	0.23501	0.0562264	0.250654	0.112956	0.101454	0.0461528	0.114821	0.530881	0.29814	0.536092	0.162466	0.121544	0.314656	0.213048	0.228292	0.56266	0.159729	0.311873	0.362577	0.149248	0.189047	0.15525	0.271863	0.223683	0.0450877	0	0.178002	0.585283	0	0.617562	0.853863	0.236787	0.409233
AC009090.3	0.113817	0.270283	0.246453	0.0328312	0.113998	0.166452	0.134253	0.157987	0.0424798	0.0262576	0.099261	0.138208	0.125591	0.202913	0.0591057	0.116941	0.157644	0	0.126103	0.265197	0.102083	0.0619182	0.179717	0.133542	0.0499978	0.0719217	0.290618	0.570718	0	0.0857472	0.336902	0.0419367	0.178576	0.313805	0.648575	0.0333717	0.158515	0.130176	0.227956	0.0750228	0.0604893	0.186299	0.199006	0.642446	0.696144	0.165703	0	0.238253	0.205884
AP001469.2	0.494665	0.342619	0.26778	0	0.385351	0.301428	0	0.114439	0	0.15216	0.215702	0.0667414	0.181945	0.293964	0.171255	0.0423537	0.399667	0.109281	0.182688	0.219541	0.0492962	0.179404	0.0743883	0.451419	0.108649	0.104194	0.315767	0.0393719	0	0.124224	0.133112	0.303772	0.155224	0.252564	0.587251	0.0483461	0.183715	0.188588	0.264195	0.181145	0.525792	0.674738	0.230643	1.18926	0.252129	0.480115	0.829779	0.805377	0.0994227
AP002907.1	0.299797	0.480556	0.243437	0.0648588	0.240219	0.164415	0.0707254	0.171659	0.08392	0.124494	0.0980463	0.382246	0.148864	0.160344	0.140118	0.311877	0.404858	0.119216	0.199296	0.209561	0.121	0.0611605	0.0608631	0.175878	0.128403	0.397832	0.287061	0.128854	0.0595677	0.101638	0.302526	0.198833	0.141113	0.358182	0.352351	0.0922971	0.325676	0.205733	0.324239	0.118568	0.143398	0.184019	0.235884	0.888417	0.27505	0.883848	0.169728	0.627567	0.271153
NARF-IT1	0.334493	0.421988	0.316879	0.168852	0.362944	0.183444	0.065759	0.0580381	0	0.077168	0.0729291	0.203088	0.15379	0.149084	0.130278	0.128879	0.347472	0.304822	0.185301	0.167011	0.125003	0.0909851	0.0377262	0.555993	0.0918359	0.369896	0.186832	0.0599026	0.0886157	0.0840003	0.0675079	0.0616235	0.262408	0.409883	0.744564	0.0980754	0.116464	0.229543	0.0669935	0.128615	0.0444427	0.342195	0.555611	0.419572	0.255736	0.182619	0.105206	0.350099	0.302535
AC009032.1	0.0497343	0.132868	0.080769	0	0	0.0545507	0.0586643	0.155329	0	0.0344212	0	0	0.164637	0.1064	0	0.0766494	0.361648	0.0494427	0.0551031	0.0993281	0.0446068	0.0811689	0.235592	0.116708	0.0655423	0	0.0476215	0.0356265	0.0790551	0.0374688	0	0.10995	0	0.0914153	0.106278	0	0	0.0341297	0.0597657	0.163913	0.0792957	0.12211	0.156527	0.280728	0.228145	0.108611	0	0.104109	0.17993
AC019080.1	0.191308	0.234251	0.15777	0.100884	0.173649	0.206556	0.0846219	0.158708	0.200818	0.0765466	0.207249	0.264974	0.168219	0.124702	0.186276	0.119779	0.242203	0.104008	0.188777	0.244767	0.0938354	0.109766	0.10721	0.143797	0.104391	0.187	0.251874	0.0728032	0.071272	0.15764	0.164092	0.11895	0.135072	0.175819	0.178853	0.163019	0.10491	0.17231	0.190382	0.141864	0.164424	0.205498	0.266553	0.236217	0.0548489	0.228475	0.0564102	0.187719	0.129772
AC253536.6	0.64662	0.806162	0.498806	0.391697	0.712413	0.283697	0.190681	0.370244	0.108602	0.223764	0.296061	0.588894	0.356756	0.484176	0.201476	0.298967	0.638124	0.257132	0.322391	0.516566	0.202985	0.211064	0.175031	0.531081	0.426074	0.612907	0.278618	0.13896	0.231263	0.462794	0.574207	0.357379	0.54785	0.980543	0.829061	0.142195	0.324202	0.621232	0.582783	0.362289	0.515482	0.396905	1.42456	0.912473	1.18649	0.776657	0.976211	1.01518	0.29242
AC113143.1	0.142428	0.0634178	0	0	0.142655	0.0781108	0	0	0	0.0492876	0.0931603	0	0.0785811	0	0.110946	0.0548769	0.295909	0.21239	0	0	0.127744	0.174338	0.0481918	0.250669	0.0469248	0	0	0.0510134	0.169798	0.0536514	0.0574901	0.0787184	0	0	0	0	0.119018	0.0488701	0	0	0	0.174849	0	0.267982	0	1.24415	1.07513	0.149073	0.12882
LINC00571	0.0543587	0.0161359	0.0882792	0.0470405	0.0725935	0.178869	0.106865	0.150909	0.182595	0.0250812	0.189628	0	0.159952	0.0387645	0.197602	0.0139628	0.188226	0.0540401	0.100378	0.09047	0.065006	0.0591442	0.147142	0.1063	0.155213	0.0686995	0.0693994	0.0129797	0.014401	0.109207	0.19016	0.100145	0.0682304	0.233136	0.11616	0.0637531	0.105989	0.124344	0.108871	0.0358308	0.086669	0.0444882	0.209099	0.545478	0	0.0791399	0	0.189649	0.262214
AC005104.1	0.775944	1.07968	0.669451	0.545577	0.53431	0.744703	0.343226	0.151464	0.162904	0.537034	0.126883	0.765563	0.48162	0.881892	0.528875	0.485822	1.1587	0.43391	0.429854	0.774849	0.26098	0.118723	0.557912	0.967326	0.415423	0.551616	0.464363	0.451619	0.192719	0.328827	0.743859	0.85771	0.319579	1.7828	2.43537	0.426584	0.810505	0.565765	0.407948	0.575401	0.579917	0	0.356139	1.77932	2.0022	1.58862	0	2.74099	0.526356
AL731571.1	0.493632	0.819396	0.676604	0.228966	1.13518	0.337857	0.116453	0.185004	0.141495	0.235051	0.196309	0.254153	0.461903	0.342164	0.344529	0.197801	0.656365	0.372961	0.17939	0.583635	0.251476	0.21591	0.205774	0.898894	0.202966	0.464152	0.306285	0.27157	0.153792	0.184459	0.551526	0.523823	0.178445	0.802081	1.36286	0.194525	0.455394	0.35772	0.427102	0.288937	0.437595	0.252094	0.484719	1.31887	0.688385	0.327713	0.670718	1.00026	0.150013
MCCC1-AS1	0.448323	0.399242	0.159268	0.218231	0.112259	0.276604	0.165257	0.350049	0.094122	0.13575	0.256586	0.2722	0.0927565	0.149864	0.0436532	0.0431842	0.291074	0.167136	0.155225	0.251826	0.150788	0.0228652	0.11377	0.361641	0.147706	0.265593	0.295129	0.0602159	0.0668093	0.147769	0.294064	0.21681	0.105512	0.463529	0.389198	0.0492941	0.0936584	0.288429	0.168359	0.129288	0.111688	0.20639	0.176374	1.05441	0.385609	1.16263	0.211512	0.46924	0.0506861
AC090578.2	0.0725396	0	0.0589026	0.0313869	0	0.0397823	0	0	0	0	0.189788	0.0440425	0.0800437	0.0775945	0	0.0279491	0	0.0360572	0	0.0362186	0	0	0	0	0.0238991	0	0.0694581	0.0779444	0.0288264	0.027325	0.20496	0	0	0.0333333	0.0387526	0	0.0303082	0.0497797	0.130756	0	0.0289141	0.0890517	0.304401	0	0	0.0792068	0	0	0
RDH10-AS1	0.039476	0.0803526	0.0274755	0.0146406	0.0169452	0.0556701	0.013304	0.0410969	0.0252577	0.0156123	0.0295093	0.0753277	0.0622281	0.030162	0	0.0391111	0.123023	0	0.00624821	0.0281573	0.0202321	0.0460192	0.026714	0.0860185	0.0111479	0.0962172	0.0323992	0.0484769	0.0134462	0.0594809	0.0864998	0.0623369	0.0265445	0.129571	0.090382	0.00496053	0.0471249	0.01548	0.0271076	0.0260208	0.0224786	0	0.0650787	0.159161	0.0258696	0.135471	0	0.0944405	0.214226
SREBF2-AS1	1.11157	0.951564	0.908428	0.99916	0.811662	1.30575	0.304529	0.664467	0.586176	0.640277	0.919385	0.957914	0.712198	1.25808	0.70387	1.07762	1.06531	1.20487	0.921692	1.03123	0.572457	0.848553	0.922076	0.572176	1.12938	1.19637	0.583678	0.92983	0.723861	1.1454	0.903146	0.77686	0.823638	1.13362	1.17234	0.889446	0.904897	1.06793	1.21513	0.836696	0.931877	1.42623	0.767394	0.951274	1.48038	1.34686	1.70523	3.03243	1.14158
PSPC1-AS2	0.171028	0.659984	0.416626	0.394673	0.171299	0.500242	0	0.17805	0.255331	0.394563	0.6712	0.484585	0.251627	0.487855	0.266447	0.395376	0.651433	0.283375	0.505308	0.797002	0.0511317	0.279126	0.308632	0.668896	0.375648	1.18881	0.655049	0.204189	0.135929	0.386547	0.414204	0.252066	0.26834	0.366755	0.487294	0.40117	0.428749	0.430343	0.34254	0.112734	0.409027	0.419917	0.418653	1.23354	0.523034	1.49398	0	0.716027	0.515623
AC124067.4	2.31564	2.8244	3.59967	1.48927	5.34257	1.27489	6.54693	3.90219	1.31154	1.80222	4.50263	2.06789	3.35058	1.81197	1.30547	3.31886	3.80948	1.90794	2.74531	5.29057	3.95178	3.11016	2.04873	6.23741	3.25353	6.09792	0.362356	3.53056	1.51816	5.06398	3.90606	4.25281	2.85002	2.61673	3.54276	2.07651	4.7811	3.55536	5.96604	3.10025	4.23076	15.9946	3.54471	7.01009	12.8131	10.6058	6.32537	12.0146	1.09202
AC010226.1	0.47517	0.70525	0.500164	0.274132	0.405418	0.810736	0.705802	0.732862	1.06409	0.267966	0.506492	0.769334	0.582584	0.451807	1.37088	0.461092	0.438762	0.524872	0.779949	0.685388	0.31569	0.459557	0.357284	0.557523	0.51024	0.433715	1.07848	0.340383	0.377654	0.238656	0.667744	0.408521	0.198809	0.339655	0.376072	0.572771	0.411774	0.37439	0.655607	0.382813	0.406863	0.172839	0.147702	0.347684	0.080731	0.153731	0.0664232	0.331559	0.604862
AC133540.1	0	0.0187328	0.0854059	0.0182038	0	0.023073	0.0496258	0.0437991	0.0235536	0	0.0825552	0	0.0464238	0	0	0.01621	0.10926	0.0209125	0.0233066	0	0.0566012	0	0	0.0246815	0.055444	0	0	0.0150687	0	0.0475439	0.0339637	0	0.0198029	0.0193327	0.0449515	0.0185034	0.0703127	0.0433069	0	0.0138658	0.0167696	1.13626	0.0220683	0.0395793	0.675478	0.0459384	0	0.176138	0
LINC01772	0.198171	0.135298	0.134096	0.0800292	0.105859	0.224608	0.0779178	0.144416	0.110945	0.0640055	0.0864137	0.136362	0.211382	0.091858	0.216114	0.0407222	0.198998	0.0591027	0.124419	0.224276	0.0592466	0.102418	0.0804631	0.100757	0.117522	0.100181	0.284628	0.0993701	0.0682505	0.0646958	0.117319	0.109526	0.0808409	0.212481	0.176447	0.0813466	0.0938388	0.0589302	0.261956	0.0566042	0.0895223	0.24328	0.0692994	0.248575	0.151511	0.187533	0.0997269	0.898803	0.107542
AL109614.1	0.204634	0.683369	0.249247	0.0885424	0.35868	0.56113	0.0603445	0.319556	0.343691	0.177035	0.468469	0.062122	0.169352	0.164171	0.159402	0.157689	0.58458	0.203435	0	0.459778	0.183537	0.0417468	0.207719	0.2401	0.168548	0.290948	0	0.293175	0.0813192	0.19271	0.90859	0.791693	0.240801	0.658234	0.655928	0.225	0.427498	0.351071	0.307387	0.23605	0.0815667	0.50243	0.912386	1.78074	0.938715	0.335164	0	2.24891	0.555249
AC009107.2	0.148599	0.165414	0.180995	0.128594	0.186045	0.122243	0.0438203	0	0.166385	0.102846	0.242992	0.180445	0.28695	0.198693	0.231506	0.200391	0.192956	0.147728	0.123481	0.333877	0.233239	0.0606305	0.0502798	0.130765	0.146874	0.563407	0.249002	0.159671	0.0590516	0.0839639	0.419867	0.164258	0.069945	0.102426	0.238157	0.0653553	0.248349	0.20395	0.178572	0.146925	0.118463	0.182425	0.155893	0.733932	0.340833	0.243386	0.140214	0.544363	0.134402
AP002449.1	0.0452225	0.161087	0.146884	0.0391342	0	0.049602	0.320055	0	0.0506353	0.0625973	0	0.219655	0.249503	0.0967476	0.070453	0.104544	0.422795	0.0449574	0.35073	0.180635	0.121681	0.0738055	0.122411	0.689781	0.0893947	0.514377	0.0433014	0.0647892	0	0.102209	0.0730148	0.349915	0.170288	0.249367	0.144954	0.119335	0.302315	0.124134	0.163032	0.0298086	0.0721022	0	0.142327	0.212718	0	0.0987579	0	0	0.327214
AL390195.3	0.233109	0.424614	0.206494	0.0733549	0.169804	0.139464	0.087489	0.209588	0.367788	0.176003	0.166335	0.283065	0.374144	0.124677	0.247613	0.195962	0.396252	0.115871	0.586986	0.359751	0.142552	0.242102	0.164919	0.248645	0.286258	0.160695	0.608745	0.166985	0.18527	0.311327	0.479018	0.374798	0.109723	0.379782	0.532097	0.270289	0.247919	0.239954	0.267394	0.0907962	0.253409	0.130078	0.16674	0.986851	0.0972124	0.416511	0	0.421428	0.115002
AL161891.1	0.175701	0.168818	0.105125	0.196059	0.194504	0.126787	0.109078	0.0625762	0.155313	0.102402	0.0604859	0.117906	0.122448	0.163215	0.0936435	0.103326	0.158502	0.114915	0.143439	0.355522	0.0912342	0.0792342	0.156446	0.195301	0.106634	0.122714	0.0531273	0.0861154	0.0698212	0.139336	0.302344	0.16355	0.0696433	0.182722	0.177847	0.174884	0.146821	0.142784	0.138907	0.0731456	0.213787	0.363276	0.266786	0.252288	0.530254	1.28236	0	0.280686	0.0920025
AL136988.2	0.149376	0.0665114	0.101079	0.0215443	0.149614	0.0819211	0.0293662	0.103673	0.167255	0.0172306	0.0325682	0.0302313	0.0824143	0.0532617	0	0.0191846	0.103448	0.1485	0.0275836	0.0994435	0.0893172	0.0406316	0.0505426	0.175265	0	0.094392	0.0715152	0.0535019	0.0395735	0.0750247	0.0401963	0.192636	0.0703106	0.183043	0.186202	0.0875958	0.0624117	0.0854233	0.0598351	0.0656413	0.0793878	0	0.235062	0.18737	0.22841	0.326211	0	0.469035	0.0450347
FTX	0.188766	0.255264	0.227081	0.111927	0.259091	0.333576	0.17318	0.1856	0.250501	0.104033	0.141761	0.199506	0.354871	0.172006	0.266853	0.118524	0.214247	0.135532	0.193652	0.216426	0.125411	0.125513	0.158494	0.209177	0.108259	0.139163	0.361495	0.217855	0.119466	0.126412	0.242692	0.170017	0.0987238	0.276288	0.291327	0.147593	0.16066	0.187112	0.256246	0.172814	0.130976	0.171655	0.502415	0.720202	0.192427	0.198482	0.158324	0.424416	0.284551
MCF2L-AS1	3.22134	2.01076	2.32239	1.17238	4.34215	1.12273	1.56252	3.79241	1.44951	1.58357	4.88359	2.70527	2.55797	1.99664	1.45398	2.85352	2.03282	1.79577	1.80122	4.50952	2.07917	3.12004	1.6706	1.16568	2.06311	1.54096	0.144135	1.16457	0.66997	2.24545	4.1317	1.79703	5.78166	2.15815	3.02368	2.1715	2.79249	2.08666	5.57147	2.26227	4.48806	19.0708	2.81095	4.44664	18.6441	8.4155	10.9083	4.28544	5.77266
SNHG10	1.1682	1.56047	1.16336	1.08723	1.60056	1.41431	2.66493	1.70953	1.27101	0.625458	1.34079	1.27135	0.766135	1.70937	1.32205	1.09553	1.29367	1.01893	1.30653	1.6838	0.701806	0.791407	0.723421	1.35774	0.639046	1.1073	0.622605	0.892092	0.569339	0.880103	1.25447	0.645653	0.788491	1.87378	1.87226	1.4832	1.28931	1.142	1.69519	0.762764	1.12457	1.02824	1.41054	1.50335	4.24666	4.66909	1.8718	1.08429	2.77106
STX18-AS1	0.308878	0.290692	0.242261	0.121497	0.295307	0.207895	0.173889	0.270404	0.220085	0.170049	0.266316	0.144914	0.120066	0.296611	0.185921	0.300228	0.291694	0.195407	0.167222	0.234837	0.258145	0.180447	0.213774	0.24298	0.173461	0.219581	0.19157	0.100573	0.0725308	0.153372	0.232351	0.232791	0.267645	0.229032	0.266268	0.12041	0.237577	0.274591	0.383833	0.240617	0.218255	0.180976	0.346134	0.488704	0.402531	0.20696	0.304696	0.66862	0.273018
AC004148.1	1.18348	1.6843	1.49089	0.612578	1.52879	1.00694	0.182652	0.633313	0.371534	0.48227	0.752397	1.34309	0.781107	0.946509	0.620335	0.673332	1.59708	0.824683	0.710768	1.21495	0.872986	0.640828	0.583821	1.51837	0.765252	1.67743	0.900213	0.570466	0.369209	0.624964	1.02684	1.13703	0.66639	1.12833	2.30446	0.457267	1.02593	0.865288	1.07662	0.714484	0.723031	0.597446	1.35761	2.09149	2.79059	2.27051	1.83682	2.08379	1.14044
AC009120.2	1.2873	1.25637	1.07697	0.365704	1.2633	1.16951	0.475471	0.460256	0.393103	0.512967	0.833498	1.01843	0.660014	0.86932	0.506441	0.771539	1.24269	0.568778	0.922029	0.86348	0.489822	0.583594	0.435567	1.16713	0.629749	1.07228	0.715911	0.605446	0.470218	0.489811	0.797782	0.898326	0.789539	1.1054	1.75053	0.417475	1.01051	0.945859	1.04692	0.565686	0.684151	0.303294	0.75027	2.78295	1.31227	2.2575	1.22693	1.94618	0.399862
AC129510.1	0.540714	0.584701	0.689956	0.100268	0.851045	0.720167	0.0911147	0.0402084	0.172981	0.106923	0.454723	0.468993	0.468796	0.702335	0.180512	0.14881	0.682058	0.19198	0.556294	0.732791	0.381047	0.220618	0.313637	0.317213	0.101797	0.29287	0.443781	0.442668	0.122785	0.203682	0.249434	0.555	0.254512	0.851891	0.78406	0.169865	0.451838	0.344556	0.324888	0.407331	0.461844	0	0.891402	1.56238	0.177172	0.506067	1.31195	1.53612	0.139729
AC012184.3	0.241646	0.202533	0.300099	0.110707	0.270505	0.187093	0.268269	0.355156	0.206906	0.127893	0.576445	0.207128	0.15685	0.243281	0.155015	0.230024	0.206724	0.197836	0.362227	0.283889	0.242231	0.208789	0.182764	0.0833902	0.262256	0.215574	0.0952746	0.274925	0.124271	0.246305	0.195077	0.0942742	0.187339	0.313528	0.212625	0.237563	0.296952	0.23411	0.54661	0.159282	0.339951	0.383903	0.13421	0.307566	0.717264	0.0931258	0.482846	0.416575	0.128564
AC079414.3	0.668629	0.963195	0.670679	0.374396	0.709086	0.690241	0.394343	0.491353	0.374329	0.476371	0.848955	1.05072	0.455698	0.631078	0.275736	0.424314	0.755858	0.72336	0.893328	0.667685	0.493867	0.545619	0.306084	1.17677	0.375786	0.671049	0.640225	0.436703	0.312594	0.533364	0.301638	0.49997	0.333233	0.614495	1.00856	0.27677	0.72306	0.580299	0.77986	0.699983	0.501673	1.06225	0.515772	0.832527	0.541268	1.33133	0.964904	2.59346	0.747039
AC011472.4	0.218284	1.16632	0.319046	0.340014	0.743344	2.01115	0.411965	1.68163	2.54187	0.48344	0.571105	2.01447	2.21595	0.233495	1.15623	0.201849	0.816312	0.217004	4.83696	0.0871902	0.391559	0.676876	0.797667	0.256115	0.258899	0.662089	3.46958	0.594187	0.90213	0.164451	1.33925	0.241286	0.0821961	0.320977	0.419807	0.268808	0.218886	0.239672	1.2591	0.201436	0.24362	0.214377	0.366397	0.451776	0	0.190677	0.164773	0.091387	0.0789712
AC141002.1	0.230489	0.684185	0.124772	0.0664861	0.384759	0.50562	0.0906248	0.0799844	0.0860255	0.212696	0.603037	0.279883	0.169555	0.164367	0.119694	0.355225	0.558675	0.381896	0.170247	0.383606	0.206726	0.25078	0.155975	0.36058	0.253125	0.291296	0.147132	0.27518	0.122124	0.231528	0.18607	0.254777	0.289307	0.211828	0.492533	0.0675806	0.192604	0.210895	0.184652	0.101285	0.244993	0.377273	0.0806009	0.722783	0	0.671129	1.15991	2.25159	0.416934
ODF2-AS1	0.105334	0.140703	0.0855318	0.091153	0.211003	0	0	0	0.0589708	0	0	0.191861	0	0.0563371	0.0820509	0	0.0547105	0	0.0583525	0	0.0472372	0	0.0356406	0.0617948	0	0.0998421	0.0504296	0.0754548	0	0.0396783	0.127552	0	0.0495802	0.242015	0.281361	0	0.0880205	0	0	0.0347157	0.209929	0	0.110504	0.148641	0	0.575077	0.39756	0.330745	0.19054
AL133410.1	0.54039	0.641639	0.420516	0.292274	0.405937	0.271665	0.212473	0.234408	0.100845	0.155836	0.500736	0.437464	0.223609	0.168597	0.245549	0.329665	0.537968	0.268611	0.449044	0.494658	0.282728	0.220486	0.167608	0.317023	0.311567	0.725638	0.237157	0.161293	0.196849	0.271413	0.345363	0.472889	0.254359	0.993277	0.745785	0.297085	0.338676	0.339934	0.541156	0.415567	0.305147	0.331699	0.236215	1.94878	1.23946	3.58952	0.594878	1.60254	0.570219
AL354696.1	0.733205	0.76816	0.490302	0.522525	0.863965	0.520372	0.91573	0.62861	0.338044	0.447753	1.12842	0.523725	0.380731	0.738163	0.26877	0.432059	0.582441	0.514522	0.621213	0.473757	0.386832	0.774289	0.262679	0.354232	0.36945	1.47172	0.412975	0.370746	0.411341	0.714848	0.522269	0.572094	0.730834	0.396378	0.691231	0.417314	0.576649	0.591947	0.673777	0.540154	0.309445	0.741261	0.588208	0.689771	0.593544	1.13025	0.813918	1.98624	1.87243
AC092902.2	0.114935	0	0.466641	0.149193	0.748268	0.882463	1.62687	1.37603	0.579115	0.119321	0.150355	0	0.0634126	0.983557	0.08953	0.752828	0.358185	0.114262	0.764058	0.860799	0.412344	0.281371	0.738897	0	0.719472	0.435772	0.0550265	0.411663	0.182696	0.0865902	0.278357	0.317617	0.919693	1.00348	0.0614016	0.0505496	0.960438	0.630987	1.5193	1.1364	0.641381	0.141098	0	0.432507	0.26362	0	0	0.240595	0
AL158212.2	0.232994	0.331979	0.151354	0	0.280037	0.102223	0.0549659	0.0970245	0.156529	0.225758	0.121918	0.22634	0.0514194	0.0498461	0.145194	0.143634	0.242035	0.0463257	0.361405	0.0930661	0.0835893	0.0760517	0.126137	0.10935	0.122821	0.265016	0.0446193	0.166903	0.0370356	0.140427	0.26333	0.257546	0.0877354	0.128478	0.149366	0.0409891	0.155758	0.191868	0.167993	0.0307158	0.0742966	0	0.391089	0.394545	0	0.305291	0.527631	0	0
HIF1A-AS3	0.201083	0.179069	0.261249	0.104407	0.443086	0.176445	0.0948755	0	0.135091	0.194838	0.0526102	0.146505	0.221885	0.0860382	0.0626542	0.154952	0.0835541	0.0399809	0.267348	0.321279	0.180352	0.0656356	0.108861	0.14156	0.0794992	0.457438	0.115525	0.0576174	0.127853	0.242388	0.25973	0.40009	0.113579	0.295685	0.300787	0.106126	0.168032	0.496769	0.193313	0.212072	0.160302	0.0987421	0.506288	0.227005	0	0.526956	0.303578	0	0.218245
MRTFA-AS1	0	0.0153756	0.0140199	0.0149413	0.0259398	0	0	0	0	0	0.0112933	0.0104829	0.0190519	0.0184689	0	0.0199572	0.0448393	0.0343291	0.00956483	0	0.00774286	0	0.0233681	0.0506454	0.0170653	0.0327312	0	0.0185522	0.00686121	0	0.0209076	0.0572555	0.00812692	0.00793395	0.0368954	0.0151873	0.0144278	0.0177727	0.0103742	0	0.00688209	0.0423919	0	0.032486	0	0.169674	0.0977489	0.0722852	0.0156161
AC018690.1	0.787565	0.823317	0.695117	0.533376	0.823113	0.450697	0.242342	0.071296	0.306723	0.213291	0.537532	0.291061	0.415626	0.659306	0.373423	0.316638	0.782553	0.544659	0.531138	0.37613	0.675658	0.419135	0.301237	1.20529	0.383569	0.454393	0.229511	0.637749	0.272147	0.74812	0.746361	0.719154	0.25788	0.975559	1.06099	0.602396	0.429205	0.493463	0.699526	0.29342	0.464057	0.420364	0.143691	1.22411	0.628309	2.46768	0.646194	1.86365	0.433585
AC073957.3	1.12918	1.16657	0.90145	0.370553	1.37878	0.643622	0.370398	0.392951	0.174024	0.665163	0.535265	0.731804	0.944996	0.563221	0.2619	0.488841	0.945647	0.476144	0.495513	0.807684	0.517764	0.641904	0.485098	1.24673	0.522505	1.04626	0.258155	0.377173	0.632751	0.616522	1.05497	1.19207	0.719617	0.889094	1.4471	0.223202	1.19538	0.835839	0.697528	0.570775	0.89765	0.443901	1.28777	2.9213	0.611109	1.51697	1.48447	2.84843	0.286881
AL008718.3	0	0.1784	0.216894	0.057787	0.20065	0.0732441	0	0	0	0.0924334	0	0	0.0736851	0.0714305	0	0.0514578	0.346841	0.0663857	0.0739859	0.0666829	0.0598926	0	0.0903783	0.156701	0.0880023	0	0	0	0.0530728	0.100617	0.161724	0.221442	0.0628633	0.368224	0.356741	0	0.111602	0.0458252	0.0802461	0.0440165	0.0532344	0	0	0	0	0.291659	0	0.139785	0.120794
AC114763.1	0.195907	0.130845	0.106052	0.084766	0.114461	0.143253	0.0770277	0.169959	0.164516	0.0564949	0.106783	0.198242	0.126101	0.139706	0.203471	0.138383	0.135672	0.0811493	0.0542638	0.0815126	0.146425	0.0799325	0.121525	0.26817	0.118331	0.0928463	0.125056	0.093557	0.0648758	0.147592	0.158152	0.0902294	0.107581	0.195049	0.209317	0.100522	0.0954952	0.134439	0.215803	0.129133	0.0780879	0.280584	0.188396	0.0767923	0.14978	0.142608	0.0616173	0.0683489	0.059063
MAP3K5-AS1	0.0424465	0.151198	0.172334	0.257124	0.170056	0.186228	0	0.132568	0.190108	0.264396	0.222109	0.103086	0.0936749	0.0908086	0.132256	0.130835	0.13228	0.0843953	0.141086	0.0847731	0.190352	0.207824	0.201069	0.0996059	0.195783	0.160934	0.0406433	0.121624	0.134942	0.287805	0.137065	0.140758	0.199793	0.429109	0.136056	0.261356	0.283757	0.174771	0.0510079	0.111915	0.338381	0.104217	0.08906	0.279524	0	0.648869	0.32041	0.444268	0.153564
Z84485.1	0.102562	0.260954	0.154665	0.0887542	0.20545	0.192848	0.13826	0.198293	0.0656216	0.101405	0.0575008	0.195708	0.0970044	0.219418	0.0913047	0.158066	0.106542	0.116527	0.129867	0.160941	0.0525647	0.0478247	0.0396602	0.0515731	0.135161	0.111103	0.0982051	0.220407	0.0815137	0.0883066	0.130109	0.0809783	0.0965509	0.175051	0.250475	0.0773274	0.0734607	0.160874	0.228891	0.0482888	0.0467211	0.143895	0.476498	1.36459	0.0672115	0.319967	0.276499	0.122682	0.212029
CD44-AS1	0.438204	0.552826	0.207564	0.0948022	0.21945	0.12016	0.0861476	0.114049	0.122663	0.0252735	0.143311	0.0443426	0.161178	0.117185	0.0568905	0.140698	0.417272	0.145212	0.202295	0.0729309	0.0655044	0.148994	0.0741349	0.942608	0.0481239	0.276905	0	0.0261585	0	0.0550224	0.147398	0.201825	0.0687534	0.302044	0.35115	0.128484	0.0305148	0.175416	0.17553	0.072211	0.203778	0.179317	0.459713	1.4085	0	2.07341	0.137825	0.305765	0.528448
AC087683.2	0.197259	0.0585545	0.106784	0	0.131715	0.0721207	0	0.0684529	0.147246	0	0.0860161	0.0798439	0.14511	0	0	0.101337	0	0.0653675	0	0.262641	0.117948	0.214624	0.0444961	0.0771487	0.0433263	0.124649	0.125919	0.0942027	0.104518	0	0	0.0726817	0	0.181288	0.281016	0.0578374	0.164836	0.0451224	0.0790153	0.0866828	0.0524179	0	0.0689805	0.247431	0.301627	0.287185	0	0.137641	0
AC092168.2	0	0.0266231	0.0485515	0.0258712	0.0598871	0	0	0	0	0.0413823	0.0391091	0.0363028	0.131955	0	0	0.115188	0.0931681	0.0297208	0.0331234	0	0	0.0731878	0.0606934	0.0350774	0.0393985	0.113349	0	0.128494	0.0237606	0	0.0482692	0.0660927	0.0281438	0.0549512	0.0638851	0.0262971	0	0.0410318	0	0.0197061	0.0714989	0	0.188181	0.253125	0.137141	0.261151	0.677017	0	0.432635
AC015813.1	1.20602	2.0593	1.22487	0.580873	1.37048	1.59385	0.23927	0.698804	0.272552	0.380333	0.738181	1.28533	0.716261	0.80481	0.775686	0.693458	1.65127	0.714971	1.18911	1.17486	0.648349	0.740366	0.62146	1.57948	0.515204	1.30745	0.861677	0.649921	0.35468	0.677972	0.777095	0.94989	0.583292	1.59308	2.78601	0.282241	0.810547	0.812436	1.06812	0.719592	1.02612	0.516153	0.398525	2.38366	2.23324	2.40016	1.78177	3.72896	0.88064
DLEU1	0.622419	0.576836	0.524508	0.433717	0.538234	0.341348	1.20371	0.951245	0.686788	0.286768	0.81423	0.558065	0.33941	0.495473	0.608868	0.54516	0.515	0.377738	0.499166	0.635995	0.527416	0.476904	0.440792	0.367269	0.404166	0.545377	0.237352	0.325324	0.261722	0.520718	0.479099	0.336003	0.5655	0.588655	0.543234	0.542716	0.508018	0.59972	0.880594	0.552196	0.569752	1.13282	0.64348	0.706402	0.639102	0.944364	0.0887774	0.458293	0.38621
AL035461.3	0.654518	1.16573	0.730775	1.0266	1.43403	0.852511	0.627283	0.511045	0.595448	0.79274	0.963249	0.546413	0.767365	0.918918	0.637303	0.945684	1.82727	0.650681	1.08776	1.10294	0.513659	0.734392	0.525971	1.96788	0.835602	0.775491	0.97924	0.351642	0.390146	0.832108	1.387	1.26611	0.693176	1.16546	0.91786	1.18743	1.19642	0.786025	1.22896	0.701072	0.913111	0	2.31743	1.23149	7.69379	4.28805	1.08077	4.45285	1.47996
LINC02657	0	0.027387	0.074917	0	0.0616056	0.0337322	0	0	0	0.0638546	0.0402313	0.0373445	0.101806	0.0986909	0	0.0473973	0.0319472	0.0305736	0.0681477	0.0307105	0	0.100384	0.0208117	0.0360839	0	0.0583009	0.11779	0.418574	0	0.0695082	0.0496543	0.0679892	0.0289514	0.028264	0.0985773	0	0.025699	0.0211046	0.0739139	0	0	0	0	0.0289321	0.564306	0.537288	0	0.0643774	0.166893
AP002812.5	0.0903179	0.294911	0.220016	0.0521057	0.0904615	0.132086	0	0	0.0337094	0.0416729	0	0.0731155	0.0996611	0.193223	0	0.0463987	0.0938224	0.0897885	0.200136	0.0901905	0.0270021	0.0491345	0.0814928	0.211942	0.0396752	0.228291	0.0576541	0.323491	0.0717825	0.0907251	0	0.199671	0.0283415	0.0276685	0.225168	0.0264817	0.0503151	0.1033	0.0723567	0.158756	0.0240003	0	0.0315838	0.283226	0	0.0657461	0.795399	0.756253	0.217836
Z97989.1	0.504676	0.544042	0.424179	0.0919436	0.283777	0.699222	0.208875	0.506964	0.594823	0.134813	0.32431	0.688089	0.527574	0.369367	0.786244	0.163747	0.3679	0.378489	0.588586	0.450915	0.254117	0.339578	0.25764	0.34282	0.19836	0.335694	1.22081	0.431286	0.175923	0.300169	0.235873	0.205526	0.0666803	0.439405	0.482463	0.210279	0.362535	0.358482	0.553271	0.262626	0.239983	0.17391	0.241503	0.416474	0.162462	0.522058	0	0.389216	0.0800803
AC018755.4	0.613791	1.38751	0.53674	0.776306	0.0472897	1.39825	0.334154	0.29492	1.63884	0.718904	0	0.917326	0.312594	1.0101	1.17691	0.727663	0.245233	0.469379	1.72628	1.74448	0.677552	0.269699	0.639018	0	2.86221	0.44753	0.180836	0.20293	0.37525	0.497989	0.190578	1.46132	0.266685	0.347136	0.252234	0.664493	0.355087	0.324006	0.397165	0.684679	0.263475	0.231848	0	0.39976	0	0	0	0.691844	0.683258
AP001619.1	0	0.0854083	0.155756	0.0414981	0.0480303	0.262991	0.0565645	0	0.0536938	0	0	0	0.10583	0.102591	0	0.0369529	0.149444	0.0476729	0	0.287318	0.0860203	0.0391318	0.0649025	0	0.0315981	0	0.0918339	0.0343513	0	0.108383	0.15485	0	0.090287	0.132215	0.15371	0	0.0801439	0.0987241	0.0576264	0	0.0382287	0	0.100616	0.40602	0	0.209446	0.723969	0	0
LAMC1-AS1	0.0895009	0.717323	0.327039	0.0387257	0.0896432	0.589011	0.105571	0.0931759	0.15032	0.0309719	0	0.543406	0.197519	0.0957377	0.27887	0.310358	0.371894	0.0889762	0.198325	0.134062	0.160547	0.0365175	0.0605667	0.367544	0.0294872	0.0848345	0.299946	0.0641129	0	0.168571	0.39739	0.197864	0	0.575783	0.478138	0.196816	0.0373949	0.0921288	0.16133	0.11799	0.0356748	0.109874	0.187788	0.715691	0.410565	0.488635	0	0.562059	0.0809496
AC011511.3	0.120763	0	0	0.0522525	0.0604776	0	0.21367	0	0	0.0835806	0	0.0733215	0	0.0645893	0	0	0	0.0600276	0	0	0.0541564	0	0	0.0708464	0.039787	0.114467	0	0	0	0	0.0974902	0	0	0	0	0	0.0504568	0.0414363	0.0725606	0.0398008	0	0.148252	0	0.113609	1.38494	0.527451	3.87425	0.884781	0.65535
UBOX5-AS1	0.0845997	0.188345	0.137391	0.0640589	0.11651	0.0811936	0.0374213	0.0440368	0.0473628	0.102466	0.110671	0.115571	0.0700135	0.090495	0.0164749	0.0651917	0.0549264	0.0735908	0.0820159	0.0422402	0.0758778	0.0345178	0.05725	0.0744464	0.0487768	0.0400945	0.0810059	0.0454515	0.0168095	0.0478019	0.136592	0.0584466	0.0497759	0.155501	0.248575	0.0186038	0.0618575	0.0870837	0.114372	0.0557643	0.0590121	0	0.0443762	0.139279	0.436593	0.115469	0.199565	0.46487	0.22955
AC010834.3	0.616355	0.772495	0.31512	0.217301	0.388692	0.450697	0.0807806	0.451541	0.357844	0.173792	0.388217	0.665281	0.705305	0.488374	0.640154	0.35182	0.758839	0.521965	0.429969	0.889034	0.491387	0.242167	0.463442	0.241059	0.361006	0.476031	0.677605	0.13082	0.108859	0.309567	0.608146	0.50467	0.451291	1.36368	0.634156	0.220879	0.400592	0.563958	0.548648	0.346085	0.345768	0.39234	1.79614	1.61068	0.523591	1.39586	0.0861592	1.09908	0.33035
AC060780.1	1.43983	1.58672	1.12531	0.654143	1.37001	1.65823	1.16762	1.25537	0.987451	0.635276	1.4362	1.24573	1.5292	1.09737	1.31784	0.651841	1.43961	0.751479	0.857453	1.70738	0.968541	1.1015	0.621152	0.971387	0.675977	0.818856	1.77503	0.863802	0.801039	0.949147	1.38029	0.557044	0.999638	1.20747	1.46147	0.918211	0.932455	1.08688	1.44908	1.00839	1.00435	1.41406	2.5301	2.04874	1.89891	0.864691	0.883077	2.41121	1.46505
AC107027.3	0.635719	0.769487	0.651524	0.566156	0.531638	0.683745	0.436815	0.430506	0.635791	0.337463	0.581333	0.749471	0.885366	0.448945	0.682702	0.661098	0.910435	0.546091	0.745376	0.770415	0.725178	0.513727	0.538796	1.05005	0.691374	0.549922	0.975123	0.614555	0.294323	0.585886	0.951674	0.477569	0.482254	0.73173	0.791344	0.656911	0.706584	0.76239	0.704608	0.655	0.728206	0.636464	0.789949	0.958057	0.821071	0.620016	0.51249	0.956077	0.602892
AL451042.2	0.948472	0.760172	1.21301	0.984936	1.78121	0.390122	1.17471	1.03679	0.530998	1.4934	1.27178	0.575866	0.784941	1.16675	0.517175	0.62125	0.714323	1.20221	0.630517	1.06552	1.04209	1.78015	1.31578	1.00157	1.06245	1.07882	0.181636	2.51388	2.01647	1.23262	0.937966	1.99199	0.848238	0.544801	1.19074	1.12629	1.06997	1.6272	1.13978	1.40668	0.982951	0.523967	0.273633	0.78075	0.217545	0.517823	0.447475	0.595633	0.557603
SP2-AS1	0.381113	0.339389	0.433252	0.219869	0.373236	0.445889	0.349645	0.440846	0.86294	0.181708	0.354532	0.555343	0.420538	0.298958	0.686102	0.31326	0.492676	0.227327	0.281503	0.30446	0.326629	0.255709	0.269367	0.317983	0.295769	0.385325	0.616314	0.18807	0.127891	0.267981	0.444407	0.439996	0.239184	0.389174	0.316712	0.320334	0.205236	0.325466	0.54958	0.301455	0.222802	1.0397	1.11061	1.13138	0.427354	0.240437	0.0639301	0.726872	0.18384
PPP1R14B-AS1	0.430864	0.92726	0.816349	0.497142	0.719248	0.905797	1.43998	0.897111	0.482434	0.646104	1.31517	0.871998	0.277337	0.883369	0.335625	0.525697	0.48488	0.356948	0.676283	0.609528	0.193221	0.82039	0.510251	0.631922	0.402201	0.544533	0.44694	1.80042	0.656343	0.703309	0.840588	0.833466	0.608416	0.791959	1.03581	1.61073	1.11013	0.295676	0.99239	0.686347	1.31668	3.34995	1.50671	6.41788	2.96474	0.940929	5.82722	5.1861	3.89697
SAMD12-AS1	0.341019	0.36876	0.632935	0.189712	0.219575	0.267174	0.344786	0.38038	0.27274	0.404606	0.382381	0.20705	0.0806349	0.156335	0.26564	0.375408	0.379554	0.266373	0.296868	0.486482	0.502486	0.337912	0.593416	0.200061	0.224706	0.184708	0.0233237	0.0697957	0.193595	0.330322	0.294963	0.269253	0.298101	0.313409	0.390389	0.171409	0.244257	0.217305	0.292716	0.272952	0.25244	0.418644	0.357758	0.343733	0.111739	0.319168	0.183871	0.0509898	0.308436
AP000866.6	0.181656	0.323538	0.252868	0.0449143	0.155953	0.170785	0.0612211	0.054033	0.116228	0.125725	0.135793	0.378147	0.143177	0	0.202147	0.0999875	0.161747	0.103195	0.0287524	0.310972	0.116377	0.0211766	0	0.456728	0.119698	0.295175	0.124243	0.0371793	0	0.0391019	0.251397	0.200799	0.0977198	0.214649	0.110909	0.0913074	0.195169	0.0890429	0.0935557	0.0684227	0.165503	0.0637162	0.163349	0.463859	1.0714	0.623394	0	0.108647	0.422486
AC010618.3	0.414813	0.397105	0.286306	0.179484	0.405086	0.329864	0.281345	0.237515	0.232231	0.157901	0.149228	0.46593	0.33185	0.366068	0.226186	0.263712	0.527862	0.268048	0.114898	0.476362	0.223228	0.296186	0.175444	0.340694	0.225498	0.412845	0.357472	0.326861	0.1566	0.328138	0.368359	0.378283	0.312401	0.486067	0.465369	0.136829	0.363963	0.327361	0.361399	0.205069	0.239748	0.381927	0.402536	0.790236	0.61843	0.475586	0.626248	0.738082	0.506493
AC022079.1	0	0.0634178	0.0578263	0.0616267	0	0	0.0840011	0.222415	0.119607	0	0.0465801	0	0	0	0	0	0.0369887	0.141593	0.0789019	0.0711136	0.0319361	0.0290563	0.0240959	0	0.0469248	0	0	0.0510134	0.0282996	0	0	0	0.0335202	0.0327242	0.076089	0	0.0595089	0.0488701	0	0.0234706	0.0283858	0	0	0.0334978	0	0	0	0	0
LINC-PINT	0.455771	0.887849	0.354668	0.201314	0.375657	0.729034	0.896012	0.6969	0.893065	0.262867	0.608647	0.524618	0.408622	0.553551	0.702657	0.270726	0.572091	0.415341	0.646995	0.630541	0.281038	0.271192	0.298789	0.65174	0.425452	0.423008	0.622792	0.360495	0.28677	0.293294	0.797196	0.341113	0.129611	0.453776	0.588422	0.354967	0.420529	0.306252	0.890012	0.278518	0.287642	0.734366	0.876595	3.11753	0.696915	2.37426	0.0716753	1.48079	0.644101
ARAP1-AS2	0.117519	0.167445	0.0667983	0.0305093	0.188329	0.05156	0	0.0244689	0.026317	0.0162671	0.030747	0.0998925	0.064838	0.100567	0.0183085	0.0633912	0.109871	0.081781	0.0911438	0.0704119	0.0421613	0.0287696	0.0874797	0.0689432	0.0464617	0.0445567	0.033758	0.05051	0.0186802	0.0531219	0.113845	0.0389708	0.0553156	0.162006	0.188345	0.0206743	0.0785621	0.0967756	0.0423668	0.0154926	0.0187371	0.0865617	0.221917	0.453285	0.0539092	0.0256641	0.0887099	0.147602	0.0637745
AC027228.2	0.228884	0.770995	0.339387	0.396139	0.448528	0.676743	0.375626	0.476564	0.523701	0.199736	0.572801	0.5317	0.494142	0.298058	0.403093	0.237723	0.537555	0.464977	0.51821	0.467059	0.285616	0.389791	0.377122	0.455371	0.334421	0.132057	0.543137	0.185344	0.213548	0.337376	0.618592	0.374004	0.149891	0.612767	0.350879	0.551469	0.390841	0.273164	0.478347	0.406693	0.36493	0.390934	0.511557	0.234049	0.639102	0.847557	0.375596	0.312472	1.65612
AL359880.1	0	0.215287	0	0.0697354	0.0807125	0	0	0	0	0	0.105418	0	0	0.0861999	0	0	0.0837112	0	0	0.0804707	0.0722764	0	0	0.189101	0	0.305532	0.0771612	0	0	0	0.0650546	0	0	0	0	0	0	0.0553003	0	0	0.0642415	0	0	0.151621	0.369663	0.527946	0	0.168688	0
AL137244.1	0.0991235	0.198611	0.0804889	0.0428893	0.273023	0.108723	0.0876913	0.0515968	0.0832409	0.120056	0.0324176	0.120366	0.218755	0.0795232	0.11582	0.114575	0.0772272	0.0985424	0.164736	0.0742377	0.11113	0.0606655	0.0838481	0.0581514	0.0489863	0.187911	0.0237282	0.106509	0.0787809	0.112017	0.0200052	0.0821766	0.046657	0.0910982	0.317727	0.0871907	0.165662	0.0850283	0.0595584	0.179679	0.118531	0.243374	0.0779918	0.466258	0.34103	0.432936	0	1.24498	0.0896529
AC116914.2	0.957598	1.37754	0.239254	0.382466	0.811563	0.96954	0.521326	0.690174	0.164956	0.40785	0.770893	1.07337	0.406407	0.70915	0.573792	0.62439	1.22431	0.805525	0.24484	0.662017	0.46247	0	0.348935	0.950706	0.485374	1.95498	0.141064	0.316599	0.117088	0.388466	0.41626	1.22135	0.277376	0.203093	1.02315	0.0647938	0.615538	0.353846	1.06223	0.388434	0.117445	0.180858	1.0046	2.42542	0.67581	1.7695	1.11207	0.308392	1.19922
A2M-AS1	0.273811	0.383169	0.468493	0.169248	0.313424	1.43728	0.392184	0.773717	1.58767	0.27749	0.332606	0.819348	1.16538	0.303351	1.82818	0.286351	0.650137	0.213876	1.30015	0.410136	0.280665	0.351115	0.311026	0.229475	0.32218	0.444917	2.01316	0.427307	0.349743	0.294691	1.27889	0.237807	0.184116	0.305566	0.292554	0.507502	0.261491	0.288561	0.470055	0.257834	0.226076	0.168069	0.225697	0.0919966	0.179435	0.042711	0.073817	0.450348	0.159203
AL451042.1	0.827472	0.631614	0.671912	0.71607	2.0917	0.129658	0.418307	0.369192	0.617676	1.00904	1.03093	0.478477	0.782633	1.01158	0.552486	0.54655	0.327458	0.940138	0.654856	1.18043	0.989549	1.02893	0.906607	1.8493	0.804881	0.821679	0.0377295	2.06051	1.28399	0.77183	1.08153	1.74222	0.482222	0.615625	1.72613	1.0398	1.58048	0.757127	0.284107	0.779189	0.565419	0.0967455	0.454713	0.926731	0	0.5163	0.297439	0.824835	0.142555
SPRY4-AS1	0.0355088	0.0527023	0.00961111	0	0	0.0519301	0	0	0.0397589	0.0163838	0.0154838	0.0287456	0.0130607	0.0253221	0	0.0091209	0.0122955	0.0117669	0.06557	0.0118195	0.010616	0.0386348	0.0240294	0.0416629	0.0545945	0.0224383	0.0453338	0.0254363	0.00940716	0	0.0477761	0	0	0.0435119	0.025293	0.0416455	0.0296723	0.00812253	0.0711182	0.0234058	0.0094358	0.261549	0.099338	0.122486	0.108592	0.258483	0.0446734	0.123885	0.321161
AC020978.3	0.139796	0.373476	0.340547	0	0.140019	0.0511116	0.109932	0.0970245	0.0521763	0.225758	0.0609592	0.22634	0.154258	0.24923	0.145194	0.143634	0.484069	0.231628	0.0516293	0.0930661	0.0417946	0.0760517	0.126137	0.2187	0.0307052	0.0883386	0.223096	0.100142	0.222214	0.0351067	0.075237	0.103018	0.131603	0.299782	0.348521	0	0.077879	0.15989	0	0	0	0.114412	0.0488862	0.438384	0	0.712345	0.351754	0.877911	0.168586
PRR26	1.57167	1.78977	1.60373	0.994984	2.0571	1.79253	1.35349	1.35627	1.21472	0.829456	1.13111	1.48907	1.58078	1.26461	1.7407	1.37724	1.06917	1.173	1.77216	1.72455	1.51983	1.4225	1.20633	2.07525	1.22655	1.3491	2.27955	2.01922	1.461	1.33775	1.91066	1.79366	1.59522	1.22712	1.83282	1.17856	2.47365	1.58282	1.82739	1.37519	1.30467	0.574844	0.814681	2.20913	1.36112	0.425235	0.463705	0.936532	0.27256
TMED2-DT	0.313285	0.325102	0.203932	0.156839	0.243766	0.22719	0.161864	0.191377	0.173942	0.141564	0.196448	0.226368	0.15142	0.265878	0.137145	0.197521	0.295856	0.177603	0.129089	0.307672	0.127721	0.143671	0.140169	0.246067	0.170605	0.20124	0.121478	0.120555	0.125525	0.12874	0.144222	0.151684	0.177929	0.299819	0.395591	0.173086	0.242319	0.179454	0.280023	0.143358	0.146547	0.177996	0.119514	0.292291	0.48696	0.718085	0.605872	0.585345	0.290378
AL365361.1	3.38066	0.641593	1.58507	1.16701	1.02999	0.796995	1.34375	1.00648	0.641225	0.656327	1.11972	1.74973	0.631922	3.94558	1.36227	2.30141	1.52883	2.85273	1.70565	2.33053	1.62376	1.25624	1.32931	1.29329	2.26818	2.75497	0.129718	0.339655	1.18927	1.56341	0.377806	0.973363	1.11881	0.831916	1.8817	1.58705	2.52654	1.73679	1.18398	1.76565	1.22725	0.16631	0.297165	0.49241	0.0847432	0.0268953	0.116207	0.154683	0.267336
AC025171.4	0.266152	0.382869	0.0997462	0.0885847	0.184552	0.359295	0.0724479	0.170511	0.0687711	0.141696	0.294607	0.174025	0.0903645	0.131399	0.0956868	0.157765	0.148873	0.183179	0.181467	0.286221	0.257075	0.0668267	0.110836	0.16815	0.215845	0.0388116	0.176432	0.0439973	0.195259	0.215938	0.132222	0.113153	0.11564	0.244604	0.349995	0.0900429	0.188189	0.098347	0.147616	0.202425	0.228496	0.201068	0.214782	0.770417	0.281749	0.625938	0.0772717	0.299997	0.0740685
SNHG1	4.70256	5.55993	4.04094	2.68663	4.85865	4.23154	7.84245	5.31749	4.88841	2.05391	4.86018	3.89467	2.53784	5.55526	3.78758	3.1312	4.79017	3.61404	3.64841	5.51657	2.31873	1.96062	2.49872	4.02435	2.93694	4.84686	2.37162	2.46106	1.45145	2.94948	5.06328	3.2425	2.50896	3.71866	8.64648	5.16554	3.82946	4.77406	7.4959	2.65959	3.2939	6.22138	12.9921	23.0005	12.9065	13.0488	9.80061	11.4447	12.832
AC104083.1	1.6968	4.84701	3.2748	1.31231	1.14942	12.4884	1.45034	6.1016	9.70141	2.22959	1.91946	9.38641	13.4229	0.89437	16.3334	1.4465	6.19905	1.57277	17.6736	1.2442	3.6466	4.10708	3.67774	2.30827	2.37657	2.89034	19.1199	3.16496	3.53757	1.90207	6.48506	2.17462	0.956869	4.2338	1.30498	4.54971	0.746626	1.21504	2.81724	1.77764	1.32654	3.60256	5.67566	2.73759	3.0082	1.41418	0.123753	5.61102	3.66248
AL024498.1	0.247725	0.246558	0.177489	0.0882715	0.175142	0.223765	0.309394	0.318578	0.179478	0.0907682	0.285941	0.389287	0.176874	0.31175	0.204318	0.145978	0.166512	0.173839	0.129161	0.218272	0.0784182	0.154585	0.0591668	0.0341951	0.163232	0.193372	0.167436	0.041754	0.0926519	0.186631	0.0941102	0.0805379	0.123462	0.174099	0.140126	0.11536	0.0974149	0.209999	0.227646	0.105658	0.0929339	0.107334	0.22931	0.219341	0.200538	0.159114	0.109998	0.0915113	0.131798
AC093732.1	0	0.0378745	0.103605	0	0.0425983	0.0466495	0	0	0.0476213	0	0.0556374	0	0.0938607	0.0454944	0	0	0.132543	0	0.0471219	0.0424706	0	0.0347061	0.0575624	0	0.0280245	0.0806265	0.0407239	0.0304663	0	0	0.0343344	0.0470124	0	0.117262	0	0	0	0.0291863	0	0.0280343	0	0.208847	0.178473	1.36038	0.1951	1.20743	0.802614	0.712239	0.846277
AL117382.2	3.28866	3.83461	2.8049	2.6207	5.6162	1.53109	3.06984	2.09363	2.91404	1.60473	3.99263	2.44203	1.61863	3.01167	0.995206	2.46128	4.17817	2.06983	2.30679	4.04006	1.84616	2.06582	1.74517	2.22079	1.90196	3.49844	0.271853	1.15248	0.902589	1.58639	3.66718	2.90294	2.38319	4.52274	5.51083	1.93545	3.65756	2.59777	2.84316	2.33929	2.58398	11.8504	8.43907	10.3499	17.1481	14.2087	1.07157	16.839	1.02715
AC010245.2	0.385728	0.474357	0.387788	0.111266	0.533519	0.483524	0.129997	0.325078	0.226232	0.266964	0.31237	0.446086	0.587776	0.275072	0.257543	0.339701	0.725067	0.255645	0.569824	0.293473	0.345961	0.284787	0.410187	0.258617	0.278372	0.800876	0.404518	0.157892	0.175181	0.387467	0.326221	0.223339	0.172915	0.303856	0.569136	0.306979	0.445118	0.239493	0.30902	0.326899	0.263572	0.135294	0.173427	0.881275	0.92685	0.280787	0.554608	0.653648	0.365487
GARS1-DT	0.583373	0.733959	0.639688	0.278668	0.877853	0.863055	0.338005	0.406181	0.352204	0.383082	0.503069	0.57238	0.480989	0.549142	0.443518	0.395596	0.604069	0.443548	0.474679	0.624493	0.399328	0.382361	0.392883	0.501586	0.444673	0.753792	0.437042	0.334314	0.32641	0.364259	0.537258	0.591195	0.420014	0.690551	0.913519	0.337444	0.527264	0.627725	0.60682	0.380842	0.441251	0.327717	0.552276	1.5762	0.620854	0.51367	0.968799	0.783509	0.341064
AC027801.1	0.306221	0.290876	0.10775	0.0706652	0.316931	0.347072	0.144482	0.127518	0.102862	0.0635809	0.0934708	0.136343	0.214003	0.0873493	0.174925	0.141582	0.37112	0.172508	0.169639	0.183473	0.0732401	0.116613	0.0690748	0.16767	0.134518	0.193503	0.0977375	0.15355	0.0567879	0.12304	0.148324	0.157962	0.172964	0.243905	0.370807	0.161614	0.162062	0.182122	0.122662	0.0941953	0.097647	0.0501234	0.117792	0.489737	0.187296	0.0222911	0	0.128203	0.0553927
BCL2L1-AS1	0.0573141	0.408316	0	0	0	0.0628646	0	0.0596675	0.128348	0.0396673	0.0749766	0.0695966	0	0.122616	0.178581	0.0883312	0.0595379	0.113956	0.0635012	0.1717	0.154216	0	0	0.0672473	0.226594	0.108652	0	0.246338	0.0455518	0.0863586	0.185075	0.380122	0	0.158021	0	0.0504144	0.0478935	0.0786625	0.0688743	0	0	0.140721	0.0601274	0.323513	0.262915	0	0	0.719856	0.103676
ZNF32-AS2	0.544769	0.527314	0.442355	0.0819873	0.379572	0.571547	0.195569	0.345214	0.212165	0.0983573	0.433787	0.517706	0.705667	0.177353	0.295202	0.273778	0.910371	0.235467	0.288668	0.614956	0.318655	0.154624	0.224398	0.416859	0.218499	0.493915	0.725741	0.322371	0.112948	0.160598	0.305936	0.418904	0.267569	0.609502	0.860437	0.125005	0.336472	0.308827	0.455408	0.171737	0.245466	0.174463	0.347875	2.47336	0.543262	0.310351	0.178792	1.33869	0.556987
AC079907.1	0.171942	0.204158	0.279236	0.0991959	0.287026	0.125729	0.338026	0.179002	0.320871	0.119002	0.149953	0.278386	0.0632431	0.245232	0.357163	0.0883312	0.29769	0.227912	0.127002	0.457865	0.257026	0	0.271497	0.336236	0.26436	0.869214	0.0548793	0.0821125	0.0455518	0.302255	0.231344	0.570182	0.0539549	0.158021	0.367425	0.151243	0.191574	0.235988	0.206623	0.151115	0.365524	0	0.360764	0.647026	0.262915	0.625819	0.648958	0.719856	0.311028
AC084824.6	0.622822	1.06306	0.674314	0.449143	0.571828	0.740067	0.183663	0.648396	0.697369	0.323293	0.339482	0.441172	0.400897	0.832779	0.646871	0.15998	0.862651	0.928756	0.460038	0.984743	0.558611	0.508239	0.561965	0.791662	1.06018	1.1807	0.745455	0.594869	0.495004	0.586528	0.837991	1.20479	0.390879	0.715496	1.38637	0.502191	0.954159	0.676726	1.0603	0.547382	0.620638	0.892026	0.762293	1.41599	0.476176	1.36013	0.391784	3.0421	0.751087
AC022306.2	0.927655	1.06213	0.887772	0.573404	0.82958	0.654102	0.508031	0.655328	0.296768	0.642033	0.520085	0.80461	0.584925	0.992298	0.464532	1.0212	0.860401	1.02103	1.5417	0.827094	1.09945	1.00031	0.874379	1.04956	0.895053	1.69577	0.729632	0.498386	0.658283	1.07328	0.748882	0.769056	0.592587	1.18748	1.06195	1.04912	0.775179	0.773008	0.716634	0.786174	1.24134	0.894784	1.0427	1.40256	0.303958	2.38759	0.375132	2.84345	0.659233
AC006017.1	0.159253	0.0850911	0.18104	0	0	0.174676	0.0375696	0	0	0.0661317	0	0.154705	0.175727	0.10221	0.0992413	0.0736312	0.132346	0.221647	0.0352889	0.0636113	0	0.0259909	0.0431076	0.149483	0.0209872	0.18114	0.0609951	0.0684474	0.101256	0.0959825	0.10285	0.176035	0	0.14636	0.238216	0.0280163	0.0532308	0.174858	0.0382749	0	0.0253911	0.312806	0.100242	0.419494	0	0.34778	0	0.533385	0.057615
AL161729.3	0.0637012	0.0567274	0.103452	0.0551252	0.127605	0.104805	0.0375696	0.132634	0	0.0881757	0.166664	0.0386763	0.070291	0.13628	0	0.0490875	0.198519	0.0949917	0.141156	0	0.171402	0.155946	0	0.149483	0.104936	0.18114	0.0304976	0.0912633	0.0253141	0.0959825	0.051425	0.176035	0.0599677	0.0292719	0	0.0280163	0.133077	0.109286	0.114825	0.104972	0.0761734	0.156403	0.033414	0.149819	0.146108	0.278224	0.601066	1.06677	0.11523
DTX2P1-UPK3BP1-PMS2P11	0.482639	0.420457	0.443024	0.254229	0.777653	0.345247	0.28465	0.273074	0.328943	0.312251	0.356864	0.318516	0.439946	0.291806	0.114421	0.202128	0.425071	0.365073	0.31387	0.387662	0.21644	0.0684949	0.433113	0.664771	0.407899	0.437585	0.180836	0.353249	0.458639	0.260851	0.381157	0.440715	0.523492	0.501419	0.560519	0.249185	0.429611	0.51841	0.302602	0.145235	0.334571	0.412175	0.341222	1.55956	0.433173	0.733216	0.792007	0.593009	0.284691
AP003352.1	1.27169	1.07488	1.12888	0.568893	0.885119	0.661959	0.775437	0.605854	0.760216	0.484822	0.620319	0.745933	0.618377	0.945296	0.721957	0.813855	0.839637	0.674971	0.823888	0.710278	0.695947	0.721134	0.692832	0.910425	0.873453	1.51184	0.650109	0.710238	0.411134	0.820038	0.922211	0.655195	0.689885	1.1093	1.58903	0.900565	0.936584	1.06497	0.88065	0.774305	0.747449	2.19621	1.80896	2.21021	1.58199	2.80067	2.1558	2.2334	1.61806
AC018410.1	0.0351401	0.250345	0.028534	0.121637	0.0703919	0.0770864	0.0414497	0.073166	0	0.0486412	0.137908	0.128012	0.116326	0.0751776	0.0547454	0.0270786	0.255525	0.104802	0.0389335	0.245634	0.126069	0.0286752	0.0475597	0.0824606	0.0926188	0	0.100942	0.0503444	0.055857	0.105896	0.113472	0.233058	0	0.258361	0.187728	0.216369	0.0293642	0.168802	0.126684	0.138977	0.168081	0.0862779	0	0.231409	0	0.460438	0	0.294236	0.317827
AC022558.3	0.124625	0.249708	0.227691	0.0269617	0.187234	0.10252	0	0.0973066	0.0348853	0.0646899	0.0407576	0.37833	0.378171	0.0666546	0.0970776	0.144052	0.550206	0.0929206	0.138078	0.186673	0.0558882	0.0508485	0.0632517	0.804231	0.164237	0.413445	0.0596653	0.13391	0.0495243	0.164307	0.704254	0.206636	0.0879904	0.314971	0.366179	0.054811	0.286386	0.0855226	0.112321	0.082147	0.29805	0.152993	0.130742	0.175863	0.571688	0.476277	0	0.521756	0.112718
PAN3-AS1	0.475991	0.409751	0.669946	0.205954	0.524422	0.556894	0.31816	0.429465	0.444136	0.362378	0.622677	0.732129	0.507723	0.610992	0.49437	0.268982	0.593352	0.520521	1.1778	0.617915	0.256151	0.297789	0.440218	0.614335	0.313642	0.631644	0.425386	0.306874	0.504408	0.358602	0.422686	0.368304	0.25392	0.65618	0.593337	0.362864	0.503821	0.381085	0.743598	0.366044	0.467997	0.545384	0.682453	1.59713	2.40185	2.3215	0.239537	1.39495	0.34441
AC004466.3	0.0392591	0.0699222	0.0637572	0	0	0.0861222	0	0.0408711	0.0879162	0.0271713	0.102715	0.143017	0	0.0419948	0	0.0605053	0.122347	0.156116	0.0869944	0.196018	0.0352116	0.0320364	0	0.138189	0.0517376	0	0.150365	0.0281228	0	0	0.285239	0	0.0739163	0.144322	0.12584	0.0690659	0.0656123	0.0269412	0.235888	0.0776335	0.0312971	0.0963911	0.123559	0.590935	0.360185	0.857349	0.29635	0.246544	0
AC012467.2	1.38588	1.76625	1.52965	0.775594	1.54601	1.30164	0.675423	1.10585	0.845568	1.01086	1.38958	1.4511	1.20874	1.12737	1.08601	1.42606	1.89655	1.1385	1.47112	1.29277	1.17601	1.09028	1.49943	1.28527	1.23581	1.54174	1.33495	0.725248	0.857425	1.29418	1.20589	0.935661	0.99216	2.03635	1.72902	0.963553	1.52562	1.24718	1.20667	1.25266	1.3959	1.75228	1.83697	2.27186	2.16989	2.15662	0.751716	3.28325	1.90647
CASC15	0.0614582	0.147087	0.0857732	0.0382261	0.0904102	0.278066	0.0860859	0.133962	0.161283	0.0638031	0.118084	0.139929	0.205567	0.0636865	0.20047	0.0547589	0.10574	0.0591886	0.174488	0.0901393	0.0620123	0.0532859	0.072782	0.0653494	0.0658066	0.0582539	0.338372	0.0522795	0.0671625	0.0636644	0.172099	0.0233525	0.0687042	0.0811934	0.123122	0.101362	0.0658005	0.0777604	0.0692384	0.0557019	0.0489941	0.268783	0.689076	0.23127	0.458129	0.578797	0.0434926	0.293485	0.0799052
MYB-AS1	0.0954809	0.170056	0.077531	0.0413132	0.382531	0	0.0563125	0	0.106909	0.0330413	0.0624526	0.173914	0.210716	0.0510672	0	0.0735766	0.148778	0.0949212	0.0528941	0.0476731	0.0856371	0.0779149	0	0.0560144	0.0943722	0.181006	0	0	0	0.143867	0.11562	0.105542	0.0449424	0.219376	0.306051	0.0419933	0.159574	0.163807	0.0573697	0.0314683	0.0761168	0	0.0500838	0.314387	0.437997	0.31277	0	0.399742	0
AC012676.4	0	0.295187	0.0897202	0.0318722	0.258225	0	0.130332	0.038343	0.041239	0.152944	0	0	0.0812815	0.157589	0.0573792	0	0.153039	0.0732296	0.163226	0.0367787	0.165168	0.0300548	0	0.129642	0.0485373	0.209463	0.0352661	0.131916	0	0.138738	0.0297328	0.162847	0.0346721	0.101546	0.236111	0	0.0615538	0.0505495	0.0442594	0.0728314	0.0880837	0.0904288	0.0386386	0.138596	0.506858	0.48259	0.278019	0.308392	0.133247
AC106786.1	0.315227	0.336861	0.341289	0.109116	0.189437	1.01422	0.0743657	0.56883	0.729446	0.159991	0.329897	0.740044	0.904376	0.0449592	1.34234	0.0323881	0.458442	0.125352	0.768365	0.293797	0.150788	0.257234	0.298647	0.221916	0.110779	0.278873	2.31408	0.180648	0.250535	0.142492	0.339304	0.0696889	0.0395669	0.444215	0.134722	0.295764	0.0878048	0.0721073	0.151524	0.0831135	0.251297	0.773964	0.440934	0.454716	0.771219	0.183573	0	0.175965	0.190073
AL121895.2	0.47954	0.469746	0.311512	0.290486	0.864545	0.262991	0.0565645	0.149769	0.0536938	0.165946	0.376393	0.931691	0.158744	0.102591	0.0747085	0.406482	0.547962	0.0953459	0.478177	0.143659	0.516122	0.430449	0.292061	0.787711	0.347579	0.363631	0.0918339	0.0687027	0.343014	0.433532	0.15485	0.318043	0.451435	0.308501	0.30742	0.295268	0.480864	0.592345	0.230506	0.37931	0.458744	0	0.905543	0.451133	0	1.57085	0.904961	1.20459	0.173489
AC073575.4	0.444435	0.487114	0.305364	0.118339	0.479384	0.449978	0.120978	0.284729	0.229676	0.0946447	0.223614	0.415138	0.113172	0.0365697	0.213044	0.131722	0.248597	0.203922	0.113634	0.409669	0.275965	0.195284	0.0694054	0.401124	0.29285	0.518478	0.425555	0.195918	0.163027	0.206049	0.110396	0.415689	0.160918	0.188517	0.511386	0.150359	0.114272	0.328451	0.451912	0.292952	0.13627	0.0839387	0.215193	0.804053	0.47048	0.373295	0.129033	0.787211	0.247368
AC132192.1	0.0359053	0.127898	0.0874659	0	0.107887	0.118148	0.0847046	0	0.0402029	0.0248502	0	0.0435999	0.0396196	0.0384073	0	0	0.149194	0	0	0.0358546	0	0.0292997	0.0242977	0.379153	0	0.0680666	0.06876	0	0	0.0811511	0.115943	0.0793777	0.0338009	0.164992	0.0767263	0	0.0600073	0.0246397	0.0862948	0.0473343	0.057247	0	0.0376677	0.371561	0.329415	0.313643	0	0	0.0649495
AC138393.3	0.0748184	0.26651	0.0303765	0.0647456	0.149875	0.082064	0.132379	0.0778905	0.167547	0.051782	0.0489376	0.136278	0.123837	0.080032	0.0582805	0.0864814	0.738353	0.0371899	0.0414476	0.373564	0.167762	0.0610537	0.0253154	0.219463	0.0246499	0.0709175	0.03582	0.0267976	0.0297319	0	0.332198	0.206756	0.10565	0.206283	0.23982	0.0658115	0.093781	0.0513434	0.134864	0.0493169	0.0596448	0.0918491	0.235473	0.492704	0	0.245085	0	0	0
AC112721.2	0.0396219	0.0705685	0	0	0	0.0869181	0	0	0	0	0	0	0	0.0847659	0	0.0610645	0.0411593	0	0.0438992	0.039566	0	0	0	0	0.0522158	0	0	0	0.0314905	0	0	0	0	0	0	0	0	0.0271902	0.0476137	0.026117	0	0.194564	0.207834	0	0.363513	0	0	0	0.0716726
AC048341.2	0.218284	0.699792	0.389945	0.226676	0.56844	0.814039	0.205982	0.227247	0.586585	0.211505	0.513994	0.477112	0.481729	0.933979	0.408082	0.370056	0.770961	0.477409	0.386957	1.13347	0.352403	0.21375	0.236346	0.768345	0.460265	1.90351	0.627033	0.469095	0.138789	0.361792	0.634381	1.0134	0.328784	0.561711	1.02619	0.422413	0.766101	0.62914	1.04925	0.517978	0.591649	0.321565	0.549596	1.93032	1.80239	3.52753	0.988637	1.46219	0.552799
AC003101.2	0	0.0863745	0.0393795	0	0	0.106386	0.114409	0	0	0.0335646	0	0	0.0535134	0	0	0	0.100756	0	0	0	0	0.0395744	0.0328184	0	0	0	0.0464363	0.0694798	0	0.0365364	0.117451	0.0536069	0	0.0445701	0	0	0.0810505	0	0	0.0319667	0.0386611	0.238143	0	0.182495	0.222467	0.105908	0	0.101518	0
AC010530.1	0.188361	0.134192	0.24472	0.130402	0.490517	0.0413205	0	0.0784381	0	0.026073	0.0492816	0.0457454	0.0831385	0.0402973	0.0586902	0.0870893	0.234803	0.0749026	0.0417389	0.263333	0.135153	0.122966	0.0509867	0.0442012	0.0744694	0.142832	0.180359	0.026986	0	0	0.121649	0.0832838	0.0709284	0.173111	0.241506	0.0331371	0.0629602	0.103409	0.135812	0.148991	0.120128	0	0	0.567048	0.345625	0.164539	0.568742	0.867454	0
AL158063.1	0.159966	0.249294	0.19484	0	0	0.0877289	0	0.0416337	0.179113	0.110713	0.156947	0.0485618	0	0.171113	0.0623035	0.215719	0.12463	0.0397571	0.132926	0.239611	0.0717371	0.0979024	0.0270629	0	0.0790543	0.303252	0.191463	0.0859424	0	0.150644	0.0645691	0.0442057	0.0376476	0.183769	0.213646	0.0703544	0.100255	0.109775	0.192231	0.105442	0.159405	0.294568	0.167818	0.827695	0.366904	0.436672	0	0.334859	0
AL096828.3	0.278383	0.123953	0.188374	0	0.232354	0.152671	0.328368	0.0966045	0.259752	0.0963348	0.182086	0	0.0511968	0.248151	0	0.178766	0.0481974	0.276751	0.205623	0.231658	0.208068	0.151445	0.156988	0.163315	0.122289	0.263869	0.0888522	0.16618	0.221252	0.104864	0.149823	0.0512862	0.0873556	0.0426407	0.14872	0.0816233	0.116313	0.0318396	0.0557554	0.122331	0.14795	0.227834	0.292047	0.436486	1.70269	0.101323	0	2.23384	0.167857
AC092718.5	0.216885	0.257521	0.264168	0.031281	0.14482	0.118944	0	0.0752635	0.0809481	0.0250178	0.0472871	0.175576	0.199434	0.0773328	0.168945	0.167129	0.2253	0.215614	0.0800994	0.108289	0.0324208	0.0589946	0.0489232	0	0.190548	0	0.0346119	0.103575	0.0574583	0.0544656	0.0875439	0.0799131	0.136116	0.0332209	0.154488	0.0635919	0.30206	0.0744177	0.0434385	0.0714804	0.115266	0.443757	0.151687	0.612111	0	0.315759	0	0.832346	0
AC004241.3	0.207306	0.627677	0.404001	0.466432	0.789016	0.227382	0.978117	0.431637	0.417814	0.200868	0.379669	0.302079	0.411753	0.665257	0.322966	0.351446	0.73219	0.288527	0.505308	0.828054	0.297494	0.372168	0.392805	0.632411	0.327838	0.707392	0.1191	0.356403	0.296571	0.249889	0.535536	0.366642	0.31225	0.304835	0.531593	0.69293	0.277171	0.312976	0.398592	0.382611	0.462737	0.305394	0.826432	0.546072	1.71175	0.90544	0	0.347165	2.54999
AL161729.4	0.405292	0.200512	0.146267	0.0779396	0.0451041	0.197574	0.106237	0.0468816	0.100845	0.0935014	0.176731	0.054683	0.149073	0.144512	0.140314	0.242911	0.0935596	0.268611	0.399151	0.40472	0.0807796	0.183738	0.152371	0.105674	0.0890191	0.0853692	0.129358	0.129034	0.0715814	0.20356	0.072708	0.149334	0.169573	0.12416	0.481151	0.158445	0.0752612	0.216322	0.162347	0.118734	0.287197	0	0.283458	1.01676	1.23946	1.86852	0	0.848402	0.0814598
AC087521.2	0.0130069	0.127413	0.0422469	0.00562792	0.0390829	0.0641997	0	0.00677052	0.0145638	0.0360086	0.0510459	0.0236916	0.0502337	0.0278267	0	0.020046	0.074314	0.0193961	0.0144111	0.0714373	0.0524969	0.026535	0.026406	0.0839367	0.0257118	0.0863016	0.0249088	0.00931738	0.0155064	0.0195984	0.0315009	0.0215664	0.00612231	0.131493	0.0555893	0.0171617	0.0434761	0.0178518	0.0312609	0.0257208	0.0362917	0.0319354	0.0272908	0.110128	0.0298332	0.0426073	0.0490919	0.0544551	0.0352927
USP3-AS1	0.378551	0.268633	0.259357	0.127964	0.189577	0.304921	0.209307	0.363306	0.271536	0.180123	0.379145	0.251385	0.169695	0.215119	0.276446	0.182317	0.43625	0.199926	0.275242	0.360297	0.206897	0.135147	0.240161	0.353939	0.163693	0.325176	0.368134	0.148296	0.131628	0.187158	0.253074	0.143839	0.21716	0.293543	0.51822	0.119665	0.222419	0.235423	0.40515	0.175447	0.179181	0.159748	0.229592	0.228143	0.244198	0.439178	0.133946	0.408594	0.246088
AC073326.1	0	0.0342707	0	0.0333027	0	0.0422107	0.0453938	0.080128	0	0	0	0	0	0	0	0.0889656	0.039977	0	0	0	0	0.0314038	0	0.090307	0	0	0.036849	0.11027	0	0	0	0	0	0	0	0	0	0.0264091	0.046246	0.0253668	0	0	0	0	0	0	0	0.161117	0
PRKCQ-AS1	1.02441	0.848499	0.648466	0.657721	0.910194	0.749077	1.21484	1.14101	1.49236	0.293509	1.41935	0.822606	0.443644	0.960292	0.50624	0.878524	0.772371	1.05125	0.860399	1.02846	0.592771	0.588756	0.715596	0.710831	0.791139	0.668214	0.179303	0.299841	0.459614	0.676335	0.529095	0.487035	0.731053	0.794681	0.888572	0.779973	0.791596	0.839054	1.30383	0.842239	0.996667	1.37929	1.3867	0.906729	1.16218	1.80413	0.394955	1.79853	0.737241
AL450998.3	0.15381	0.26149	0.238435	0.0726013	0.308108	0.245389	0.0989602	0.0582274	0.0313126	0.125807	0.164626	0.152813	0.18515	0.134614	0.0435678	0.150849	0.101677	0.139007	0.154921	0.223407	0.0501645	0.0684614	0.104085	0.114842	0.0829219	0.079522	0.0401661	0.130212	0.100018	0.0842743	0.203184	0.262754	0.0921422	0.179909	0.448196	0.110695	0.18695	0.0863595	0.252045	0.0737341	0.167204	0.102993	0.0586762	0.526175	0.192427	0.183214	0.105549	0.14635	0.0758804
AL512506.1	0.143221	0	0.116297	0.0826264	0.0478163	0.104728	0.0563125	0	0	0	0.0624526	0.0579713	0.105358	0.0510672	0	0.22073	0.0991856	0	0.105788	0.190692	0	0	0	0.112029	0	0	0.0914248	0.0341983	0	0.0359667	0.0385401	0.0527711	0.0449424	0.0438753	0.255042	0	0.0398935	0.0655229	0.229479	0	0.0761168	0.117215	0.200335	0.673686	0.218999	0.834053	0	0.199871	0
AP001628.1	0.300849	0.334891	0.244291	0.0650864	0.376659	0.329984	0	0	0.0842144	0.104109	0	0.0913303	0.497956	0	0.117174	0.231831	0.390652	0.149542	0.0833314	0.525742	0.067458	0.184125	0.152692	0.705979	0.148678	0	0.0720171	0	0.17933	0.16999	0.121435	0.581964	0	0.622105	0.642886	0.0661579	0.188549	0.154841	0.180765	0.198306	0.299793	0.184665	0.473424	1.06135	1.38007	0.3285	1.41936	0.629769	0.136052
KANSL1L-AS1	0.194956	0.225697	0.110814	0.0421774	0.17574	0.11761	0.0804867	0.0811847	0.0545728	0.053972	0.0127518	0.130205	0.161343	0.145979	0.12149	0.0901388	0.222773	0.0775254	0.162002	0.175213	0.0524571	0.0477269	0.0527721	0.148684	0.0706539	0.092396	0.121338	0.0907756	0.0387366	0.0881259	0.165255	0.0754251	0.0458825	0.197089	0.302038	0.0943178	0.114038	0.140477	0.0585698	0.0771039	0.08548	0.0957336	0.173847	0.302622	0.313012	0.1703	0.294328	0.346888	0.0352659
AC006504.7	0.877672	0.931893	1.06901	0.408968	0.710016	0.222155	0.637085	1.12457	0.793738	0.60744	1.01567	0.573871	0.595979	0.68607	0.841441	0.6243	1.33252	1.10744	1.12202	0.775307	0.544976	0.771296	0.662466	0.712927	0.64505	1.85581	0.420194	0.169268	0.402434	0.508632	0.926541	1.00747	0.762676	0.930708	1.11809	0.178157	0.705203	0.509634	1.54148	0.689776	1.18407	0.663049	1.06241	1.74663	1.54851	2.13784	0.637035	1.62525	1.03807
AC027373.1	0.0563103	0.284158	0.137173	0.0324862	0.300799	0.144115	0.0221404	0.0781634	0.0210167	0.116918	0.098218	0.182341	0.0621355	0.140547	0.0292423	0.101248	0.175486	0.0933004	0.124778	0.168693	0	0.0612676	0.012702	0.154162	0.0618405	0.142332	0.0359455	0.0941202	0.0895081	0.0707052	0.272751	0.269724	0.03534	0.207005	0.16044	0.0165105	0.141164	0.103046	0.0451121	0.0989793	0.209488	0.138256	0.118149	0.335506	0.172207	0.614859	0.0708437	0.117875	0.237674
FAM222A-AS1	0.100353	0.0536201	0.032595	0.0173686	0.0603077	0.132086	0.21307	0.146263	0.112365	0.0277819	0	0.170603	0.199322	0	0.0312684	0.0309325	0.0625483	0.099765	0.111187	0.120254	0.0900072	0.0818909	0.0814928	0.164844	0.0396752	0	0.172962	0.0575095	0	0.0756042	0.145825	0.0665569	0.0377886	0.0368914	0.0643337	0.105927	0.10063	0.0550932	0	0.0926077	0.0800011	1.03485	0.673787	0.679741	1.74932	0.525969	0.606019	1.21841	0.145224
AL139287.1	2.61002	4.35184	3.42703	1.53779	4.56089	4.1419	1.24457	2.3125	1.55448	2.15231	2.83318	4.99004	4.22811	2.49489	1.90332	2.26801	6.05713	1.93224	2.46108	4.54722	1.74325	1.08758	1.6535	4.23519	2.48823	3.57931	3.56261	2.98349	1.67716	2.09185	4.30371	2.33259	2.40477	4.54223	6.11137	2.78429	3.29473	2.74381	3.87052	1.94003	2.70047	1.36346	3.08768	8.56779	4.07587	5.21472	7.5454	12.3221	2.00906
AC098484.1	2.30298	1.53814	1.906	1.30307	1.68562	1.99166	2.76874	2.67419	2.2811	1.80847	2.31746	1.66715	2.15026	1.61073	2.34591	2.11593	1.47221	1.62905	1.76649	2.12283	1.90666	1.37333	1.46855	1.97463	1.57586	1.17541	2.62922	1.84007	1.16157	1.90185	1.60889	1.66447	1.6677	1.26178	2.17671	1.792	1.77641	1.85393	2.0224	2.04349	1.51817	0.761171	2.50895	1.33327	0.406324	2.32122	0.501468	1.39063	1.68238
AC073896.3	0.392411	0.30577	0.7966	0.382029	0.589553	0.968431	0.578589	0.306393	0.604147	0.407384	0.320838	0.595632	0.541256	0.577165	0.229254	0.680373	0.76432	0.585166	0.217386	0.342875	0.527932	0.280191	0.398326	0.863289	0.420176	0.46494	0.375741	0.351374	0.272894	0.554316	0.633575	0.10844	0.230883	0.811441	0.524092	0.345171	0.286923	0.403933	1.00207	0.290992	0.664759	0.602169	0.154377	0.876768	0.450025	0.964076	0.555401	1.84824	0.443648
AL365436.2	0.0815036	0.145162	0.132363	0.0705309	0.285716	0	0	0.0424252	0.0456295	0.141022	0.213241	0.148455	0.17987	0.0871832	0.063488	0.219821	0.0846661	0.0810259	0	0.122083	0.0365504	0.0332545	0.193042	0.0478146	0.10741	0.0772543	0	0.14596	0.0323885	0.0614033	0.0328983	0.180184	0.0383634	0.262167	0.0870829	0	0.102161	0.25169	0	0.161171	0.22741	0	0.171009	0.613404	0.18694	0.0889947	0	0.597143	0.221149
LINC01290	0.1281	0.266178	0.104018	0.0369514	0.171072	0.187341	0.0503672	0.13336	0.239055	0.20687	0.055859	0.259254	0.282704	0.137027	0.133047	0.23033	0.177428	0.127349	0.283858	0.0852797	0.153192	0.104533	0.115583	0.350704	0.112545	0.242843	0.0408862	0	0.101811	0.0965084	0.0344711	0.0943994	0.120592	0.274701	0.0912462	0.112679	0.21409	0.263723	0.307876	0.112584	0.102121	0.10484	0.268777	0.0401706	0.195877	0.0932495	0.161162	0.98323	0.154482
LINC00628	0.0665181	0.103663	0.121529	0.172688	0.16656	0.14592	0.176539	0.0865618	0.0558599	0.299243	0.0652628	0.141353	0.0550494	0.142307	0.181352	0.153775	0.103649	0.115724	0	0.215879	0.119321	0.0814208	0.157549	0.156093	0.186279	0.06305	0	0.107211	0.118951	0.0876986	0.187947	0.147055	0.0626195	0.122265	0.0710715	0.321807	0.194546	0.136942	0.0599511	0.186344	0.225368	0.449127	0.0523374	0.0469333	0.152568	0.0726319	0.564881	0.139243	0.300814
AC254562.3	0.645442	0.786542	1.4068	0.558547	1.36098	0.335344	0.480843	1.27316	0.57055	0.775869	0.888787	0.783761	0.93712	0.617743	0.582158	0.654435	0.494042	0.472801	1.05386	0.983757	0.517962	1.52465	0.459769	0.677588	0.559603	0.579591	0.878243	0.535358	0.53998	0.946934	0.493631	1.20161	1.34314	0.842947	1.34295	0.239049	1.02193	1.02573	1.46961	0.47023	0.649948	0.583846	0.213829	0.54329	0.467498	0.593486	0.769288	0.639999	0.18435
AC010168.1	0.0652525	0.0871633	0.0794782	0	0.130713	0.0357859	0.0384845	0.033966	0	0.0451615	0.0853615	0.0792363	0.144006	0.139599	0	0.0251415	0.101677	0	0	0.228062	0.0292626	0	0.0220787	0.191404	0.0214983	0.185551	0.0624806	0.0701144	0	0.02458	0.0790161	0.108193	0.15357	0.0599695	0.0348597	0	0.0545272	0.0671685	0	0.0215058	0.0260095	0.0801058	0.136911	0.122774	0.149666	0.07125	0.246281	0	0.413126
AC040934.1	0	0.0744201	0.101788	0.0361591	0.125553	0	0	0.174001	0.140357	0.0578384	0	0.101478	0.046107	0.0446963	0	0.0965962	0.0434058	0.0415396	0	0.125177	0.0749534	0.0681945	0.0565525	0.196105	0.0825986	0.158424	0.160038	0.0897956	0	0.0314797	0.067464	0.0461876	0.0786711	0.115205	0.0892897	0	0.069833	0.0286743	0.150637	0.0826274	0.0999312	0	0.0438356	0.157237	0.383354	0.09125	1.26165	0.437339	0
AL133230.2	0.0560771	0.0832298	0.0227675	0.0242637	0.0795688	0.0410052	0.0110243	0.0194599	0.0418594	0.012937	0.0183396	0.0680945	0.0412521	0.0499873	0.050962	0.0288083	0.0970882	0.0557483	0.0258878	0.0559979	0.0125739	0.0266935	0.0221365	0.0822449	0.0307922	0.0354356	0.0223729	0.00669503	0.0148562	0.0176031	0.279166	0.0929794	0.0131976	0.107369	0.159775	0.0205526	0.0468598	0.0320687	0.0280783	0.0246423	0.0149014	0.0573682	0.210806	0.36489	0.0643102	0.122462	0	0.117387	0.042266
KTN1-AS1	0.542594	0.472573	0.49869	0.283791	0.340407	0.477421	0.872116	0.614534	0.680977	0.346644	0.694206	0.434422	0.447398	0.542136	0.613088	0.491633	0.278727	0.314164	0.508681	0.327479	0.534785	0.321131	0.395427	0.489717	0.385031	0.406923	0.285464	0.123865	0.137428	0.467177	0.346572	0.303181	0.566924	0.482225	0.388615	0.388114	0.403584	0.548296	0.824002	0.373375	0.366007	0.8491	0.98833	0.297296	0.875263	0.299488	0.270053	0.424371	0.258859
AC024060.2	2.12619	2.51168	1.62078	0.788547	1.82534	1.47541	1.89377	1.71659	1.50614	1.35142	1.75967	2.00224	1.91521	1.34604	1.21681	1.63842	2.11854	1.63922	2.06726	2.33984	1.24538	1.02685	1.46819	2.49468	2.00143	3.20809	0.830966	0.80816	1.276	1.43838	2.73229	1.91856	1.22545	1.6749	2.87444	1.45038	2.53816	1.96529	1.98146	1.71611	1.6258	2.5569	1.63878	7.1437	3.38384	7.10697	2.12904	2.90663	1.56983
AC062037.3	0.587273	0.52298	0.476869	0.508209	1.47052	0.644146	0	0.305694	0.328782	0	0	0	0.324012	0.628197	1.37238	0.452546	1.22012	0	0.976005	0.293222	0	0	0	0.344527	0.386969	0.556654	0.843488	0.420686	0	0.22122	0	0	0	0.269863	0.313737	0	0.245372	0	2.11718	0	0.468171	0	0.6161	0.828726	0	0.64125	0	0.614672	0.531163
LINC02244	0.0663636	0.177295	0	0	0.0664692	0.0727905	0	0	0	0	0.17363	0	0.0732288	0.0709882	0	0	0	0.0659746	0.0735277	0.06627	0	0	0.0449094	0	0.0437287	0	0	0.0950777	0	0.0499971	0.107149	0	0	0.0609907	0.283626	0	0	0.0910829	0	0	0.105809	0	0.208864	0.561891	0.304428	0.289853	0.50095	0	0
AC020661.3	0	0.15271	0.0348114	0	0.0429391	0	0	0	0	0.0296711	0.0560825	0	0	0	0	0	0.133603	0	0.0474989	0	0	0	0	0.150903	0	0	0	0.0921302	0	0	0	0	0	0	0	0.03771	0.0358243	0	0	0.0282586	0	0	0.0449753	0.161325	0	0.37449	0	0.179484	0
AC015987.1	0.026661	0.0474845	0.108245	0.0922867	0.0801102	0.029243	0.0943445	0	0	0.0369044	0.174386	0	0.0588381	0.0570378	0.0415357	0.0616341	0.166173	0	0.0590783	0.0266234	0.0478247	0.0435122	0.0360839	0.0625634	0.0702705	0.101084	0	0.0190983	0.105948	0.0602577	0.129138	0.0884113	0.100394	0.171517	0.14243	0.046903	0.0891153	0.0914794	0.160193	0.0878687	0.042508	0	0.279697	0.0250817	0.122301	0.0582229	0.402505	0.0558097	0
LMO7-AS1	0.072295	0.128761	0.117408	0.031281	0.0724099	0	0.085276	0	0.040474	0.150107	0	0	0.0797737	0.0773328	0.168945	0.0835646	0.11265	0.215614	0.120149	0.0721929	0	0.0294973	0.122308	0.254474	0.0238185	0	0.138448	0.0258938	0.0574583	0.0544656	0.0583626	0.11987	0.0340289	0.265767	0.154488	0.0317959	0	0.0744177	0.0434385	0.0714804	0.0288166	0.798762	0.113766	2.24441	0.497455	0.868337	0	0.756679	0.196163
ZNF674-AS1	0.83555	1.21257	1.35694	0.607014	3.8951	0.995668	3.21225	1.42829	1.39756	0.628262	1.36293	1.12734	1.55941	0.849638	1.34993	0.937977	1.10371	0.830651	2.45723	1.39062	0.693896	1.2879	0.739945	3.07422	0.856434	1.38842	0.809932	0.657651	0.58209	0.893716	1.31574	1.65335	0.679759	1.40308	2.4027	1.07069	1.5171	1.01228	1.12804	0.754741	1.31574	0.354578	1.37437	1.50418	1.89279	2.4104	0.895467	1.42516	1.5301
AP005899.1	0.354631	0.315807	0.223971	0.136394	0.19733	0.0864388	0.185914	0.164086	0.0441197	0.245441	0.206186	0.287086	0.260878	0.126448	0.122775	0.242911	0.286526	0	0.218285	0.275435	0	0.128617	0.15999	0.508558	0.12982	0.149396	0.188648	0.169357	0.187901	0.237486	0.190859	0.217778	0.222564	0.90533	0.968317	0.10398	0.0329268	0.162242	0.189404	0.155838	0.157061	0	0.16535	0.444831	0.542263	1.29075	0.297439	0.164967	0.498941
AL034550.1	0.521756	0.735672	0.441322	0.338634	0.762103	0.429213	0	0.294222	0.194735	0.225693	0.227515	0.131994	0.359831	0.255802	0.237082	0.485822	0.654917	0.389023	0.0240867	0.607856	0.194985	0.230623	0.308945	0.331599	0.200549	0.288489	0.124898	0.373754	0.155504	0.343946	0.315904	0.69689	0.368382	1.33864	0.905892	0.152982	0.526829	0.492319	0.313497	0.343918	0.329286	0.266884	1.00351	1.79977	0.897539	0.80709	0.984626	2.36642	0
AL356299.3	0.0731586	0.195448	0.0594052	0.0316546	0.256462	0.200609	0	0.0380813	0.0409575	0.0506333	0.0957039	0.310928	0.0807266	0.0391283	0	0.0281876	0.227992	0.0363648	0	0.219166	0.0984242	0.0298496	0.0990151	0.214595	0.048206	0.277377	0.0700507	0.0524063	0.116289	0	0.147649	0.242603	0.103306	0.100853	0.11725	0.0321758	0.213968	0.0502044	0.131872	0.0482228	0.145804	0.269435	0.997745	0.929134	1.51019	1.27812	0.828363	1.83772	0.132337
ZNF32-AS1	0.0987809	0.219917	0.160421	0.213705	0.395752	0.487563	0.174777	0.102837	0.387115	0.239283	0.258445	0.299875	0.272499	0.158497	0.153893	0.114179	0.256534	0.147303	0.0547223	0.197283	0.132895	0.161216	0.10027	0.231802	0.0976339	0.468154	0.378339	0.106141	0.196272	0.260469	0.239233	0.21838	0.185983	0.408525	0.527714	0.173779	0.206361	0.203363	0.356115	0	0.118121	0	0.10363	0.975758	0.226568	0.97074	0	1.9644	0.536058
AC125437.1	0.150108	0.347554	0.146267	0.285779	0.180416	0.131716	0.106237	0.218781	0.20169	0.249337	0.196367	0.109366	0.331273	0.321137	0.233856	0.231344	0.218306	0.298457	0.299363	0.239834	0.134633	0.146991	0.182845	0.352248	0.19782	0	0.287463	0.215057	0.262465	0.248795	0.218124	0.265482	0.169573	0.137955	0.128307	0.10563	0.275958	0.144215	0.108231	0.257256	0.0957324	0.147422	0.188972	0.282432	0.137718	0.65562	0.22662	1.19405	0.325839
AC139887.1	0.599593	0.533952	0.73031	0.0648588	0.600546	0.575453	0.0884068	0.390134	0.33568	0.155618	0	0.455055	0.33081	0.641376	0.350294	0.46204	0.467144	0.14902	0.0830401	0.44906	0.0672221	0.366963	0.405754	0.879388	0.345701	0.284166	0.143531	0.107378	0.178703	0.282326	0.605053	0.414235	0.423339	0.757692	0.880877	0.329633	0.50104	0.411466	0.270199	0.148209	0.179247	0	0.393141	1.33968	0.343813	1.30941	1.13152	0.627567	0.542306
AL359643.3	0.503856	0.602533	0.50265	0.298987	0.576751	0.805291	0.407538	0.569506	0.548044	0.28894	0.320149	0.751681	0.81014	0.277183	0.986814	0.421546	0.553315	0.415033	0.558248	0.460018	0.361528	0.328927	0.448128	0.472944	0.388918	0.491231	1.36465	0.247496	0.240271	0.444669	0.952969	0.270518	0.406564	0.714439	0.261483	0.417874	0.36089	0.464315	0.501686	0.42701	0.298384	1.41382	2.22007	1.00219	0.92453	0.534447	0.326005	0.753375	0.234368
AL078587.1	0.0790976	0.211315	0.224797	0.0342244	0.118835	0.0433789	0.0466501	0.0823455	0.088565	0	0.0517366	0.0960484	0.13092	0.0846095	0	0.182855	0.205417	0.039317	0.0438182	0.236958	0	0.0645457	0.0267633	0.185612	0.0521194	0.374868	0	0	0.0628648	0.0297953	0.0319272	0.262298	0.0372309	0.254428	0.380305	0.139151	0.165241	0.1357	0.0475258	0	0.126112	0	0.373411	0.483678	0.181421	4.49111	0	1.07624	0.286161
DCUN1D2-AS	0.114935	0.102353	0.139992	0.0994618	0.287795	0.252132	0.0677864	0	0.128692	0.119321	0.0751776	0.139566	0.190238	0.122945	0.26859	0.044284	0.298488	0.114262	0	0.114773	0	0.0937903	0.116668	0.404565	0.151468	0	0.220106	0.205832	0.137022	0.0432951	0.0927856	0.317617	0.0540996	0.31689	0.429811	0	0.192088	0.0788734	0	0.0378801	0.0458129	0.141098	0.482309	0.540634	0.26362	0.878495	0	0.240595	0.207908
AL110115.1	0	0.104883	0.0478179	0	0.117964	0	0	0	0	0	0.0770364	0.0715086	0	0.125984	0	0	0.0611736	0	0.130492	0.0588055	0	0	0	0.0690947	0	0.111637	0	0	0	0	0.237699	0.130188	0	0.0541209	0	0.103599	0.0984185	0.0404118	0	0.0388167	0.0938914	0	0.0617792	0.277001	0	0	0	0	0.213049
AL161729.2	0.0940152	0	0.0763409	0	0.0470823	0.05156	0	0.0489378	0	0.0325341	0	0	0	0.3017	0	0.0724471	0.146495	0.046732	0	0.0469412	0.126484	0	0	0	0.0309745	0.178227	0	0	0	0.0354146	0.0379485	0	0.0442525	0.0864035	0	0.0413487	0.0392811	0.0322585	0	0	0	0	0.049315	0.0442229	0	0	0.35484	0.196803	0.34013
AL035071.1	1.45854	3.24267	2.01746	1.20995	2.42804	1.52256	0.605115	1.01578	0.450514	2.26258	1.71063	2.8582	1.9424	1.60321	1.8335	1.41073	2.07938	1.65998	4.21272	1.24554	1.44349	2.19983	1.49073	3.11578	2.14086	3.26078	2.05152	1.9383	2.00663	1.34133	1.77024	1.97915	1.26889	1.9321	1.96678	1.68111	2.08457	1.13206	1.34174	1.45868	2.14104	2.46971	2.21605	3.80413	10.8897	10.0169	1.86029	12.4864	1.47385
AL353796.1	0.25794	0.294489	0.306117	0.188873	0.311345	0.398989	0.156028	0.268531	0.133298	0.196831	0.224953	0.305186	0.277325	0.247615	0.309115	0.244635	0.577119	0.164377	0.40303	0.277389	0.166095	0.232074	0.277493	0.263843	0.209185	0.488983	0.322977	0.151608	0.110387	0.214258	0.363069	0.219323	0.174334	0.364702	0.162531	0.238523	0.23765	0.245089	0.508663	0.226696	0.263626	0.470922	0.742418	0.721758	0.60679	0.895494	0.174737	0.844534	0.263205
LINC02615	0.189348	0.244206	0.174959	0.0395514	0.215807	0.229169	0.107822	0.115555	0.168147	0.0677835	0.102496	0.126855	0.237754	0.167621	0.0712041	0.105659	0.244173	0.0908734	0.144681	0.13692	0.070273	0.0852483	0.110461	0.160877	0.141975	0.21042	0.0750224	0.191763	0.057082	0.108218	0.237193	0.2093	0.147517	0.318032	0.286023	0.103378	0.158225	0.183706	0.196155	0.0817717	0.114511	0.33665	0.136994	0.595817	0.239611	0.0855521	0.690008	0.861065	0.0472432
AC109460.2	1.21703	1.11875	1.05199	0.271789	1.04202	1.11959	0.370466	0.408711	0.351665	0.31247	0.770364	0.834267	0.541504	0.524935	0.4893	0.45379	1.65169	0.526891	0.434972	1.68576	0.33451	0.304346	0.371941	1.12855	0.491507	0.967518	0.488687	0.253105	0.265218	0.428867	1.01418	0.781129	0.221749	1.53342	2.39095	0.310796	0.754542	0.619648	1.10868	0.582251	0.532051	0.289173	1.54448	2.54841	1.08055	1.88617	2.07445	1.10945	0.319573
AL596202.1	0.534498	0.488346	0.343831	0.402469	0.590969	0.479668	0.253826	0.317969	0.341985	0.350711	0.38139	0.632184	0.337023	0.378688	0.270359	0.593747	0.627346	0.386447	0.538362	0.554539	0.473167	0.356862	0.413375	0.431663	0.320177	0.579007	0.445326	0.318239	0.275848	0.392222	0.414681	0.253209	0.424755	0.631574	0.763921	0.293083	0.516251	0.571628	0.50884	0.448404	0.392896	0.272692	0.233033	0.626912	0.413956	1.34916	0.235794	0.712008	0.326472
AC100814.2	0.65373	1.47072	0.949911	0.565719	0.861538	0.830256	0.446433	0.788032	0.577876	0.523888	0.49511	0.752046	0.721357	0.404849	1.23287	0.768893	1.07226	0.820923	1.48672	0.721524	0.987507	0.44923	0.488957	0.888139	0.680146	1.63065	0.362397	0.739408	0.76568	0.414743	0.305537	1.17901	0.421073	0.695666	0.404383	0.696091	0.603781	0.991678	0.744241	0.544307	1.17944	0.929254	1.26335	1.19764	0.947002	1.57791	0	1.8006	0.933584
AC025031.4	0.0393191	0.0700291	0.0425698	0.0170128	0.0590724	0.079066	0.0231895	0.0204668	0.0366877	0.0272129	0.0685815	0.0795755	0.0289244	0.0560787	0.030628	0.0605978	0.074882	0.0390886	0.0290425	0.0916151	0.0293879	0.0106951	0.0221732	0	0.0431806	0.0248461	0.0062748	0.0187772	0.0104166	0.0345593	0.0476125	0.079681	0.0431837	0.0782941	0.133034	0.0115286	0.0492845	0.0764501	0.0944996	0.0302369	0.0104483	0.0482692	0.0412491	0.129465	0.24049	0.100177	0	0.123461	0.0118541
AC010320.4	0.23977	0.213521	0.116817	0	0.0960606	0.210392	0.0565645	0	0	0	0.0627321	0.174692	0.10583	0.153887	0	0.110859	0	0	0.0531308	0.287318	0.12903	0.0391318	0	0.11253	0	0	0.137751	0.0343513	0.0381127	0.108383	0.116138	0.0530072	0	0.176286	0.204947	0.0421812	0.040072	0.032908	0.0576264	0.0316092	0.0382287	0	0.100616	0.180453	0.219978	0.209446	0.180992	0.501913	0
C3orf35	0.146532	0.142917	0.113318	0.0301915	0.104832	0.114802	0.0493835	0.0653779	0.0703158	0.0772685	0.118664	0.127095	0.0923942	0.134351	0.065224	0.080654	0.130472	0.0901782	0.0927713	0.118453	0.0813581	0.0740217	0.0519411	0.155553	0.0735644	0.11905	0.100219	0.399871	0.0776397	0.0893666	0.0901277	0.0925556	0.124806	0.0961914	0.201294	0.0675146	0.0932925	0.0957675	0.109006	0.0781894	0.127939	0.0856601	0.146404	0.406989	0.160043	0.502855	0.395037	0.598865	0.201952
AC012360.3	0.335609	0.475974	0.257377	0.177483	0.348592	0.402195	0.300568	0.297628	0.24356	0.202166	0.178866	0.362249	0.267458	0.226034	0.31952	0.225092	0.439017	0.25332	0.371839	0.570971	0.100336	0.172434	0.121968	0.466695	0.176094	0.294547	0.255891	0.200341	0.123488	0.121738	0.386329	0.281665	0.228178	0.405538	0.544514	0.267873	0.280446	0.213249	0.283805	0.192542	0.198182	0.22889	0.267322	0.982265	0.598706	0.610758	0.234571	0.650493	0.179878
AC007216.4	0.114424	0.305692	0.30971	0	0.076404	0.209176	0.0449899	0.119123	0.12812	0.0263978	0.199582	0.138945	0.084174	0.0815985	0.118842	0.0587827	0.356592	0.0379178	0.295812	0.190438	0.136836	0.0311244	0.0774327	0.671276	0.125662	0.0723056	0.401732	0.218577	0.181883	0.028735	0.3387	0.210803	0.143624	0.350534	0.326019	0.0670996	0.223105	0.183219	0.137504	0.0502822	0.121624	0	0.44015	0.466465	0.524895	0.916234	0	0	0.137989
AP006545.2	0.139493	0.289851	0.113269	0.0402378	0.139715	0.255004	0	0.145221	0.104126	0.0321813	0.060827	0.112925	0.153923	0.0497379	0	0.0716613	0.24151	0.0462252	0.103035	0.139296	0.166816	0.0379434	0.0314658	0.109113	0.0306385	0.088147	0.089045	0.0666162	0.110866	0.0350305	0.187685	0.154193	0.17509	0.1282	0.198723	0.0409002	0.15542	0.127635	0.279382	0.0306492	0.0370677	0.114164	0.0487801	0.174973	0.639894	0.304628	0	0.486671	0.0841103
LINC02595	0.0571612	0.101807	0.0464153	0.0494657	0.0572521	0	0.0674249	0.0595084	0	0.0395615	0	0	0.126149	0.122289	0.0890525	0	0.118758	0	0	0	0.0512681	0	0.0386819	0.268272	0.037665	0	0	0.12284	0	0.0430642	0.0922907	0	0	0	0.0610741	0.05028	0.0955316	0	0.0686907	0.0753562	0	0.140345	0.779571	0.161325	0.524429	0.74898	0	0.957249	0.827197
MAL2-AS1	0.0282976	0.125998	0.0459557	0.012244	0.184227	0.015519	0.0166893	0	0.0316846	0.0489622	0.111054	0.0687238	0.140512	0.0605391	0	0.0872234	0.102885	0.0421976	0.0783811	0.12716	0.0253802	0.0115458	0.0287242	0.132808	0.0466151	0.0268223	0.0135478	0.0202707	0.0224903	0.0746161	0.114221	0.437913	0.0665978	0.0780198	0.151174	0.0248911	0.0591161	0.0679665	0.0510079	0.0186525	0.0338381	0.034739	0.08906	0.133107	0.0649045	0.0926955	0.0534016	0.0888535	0.179158
OSGEPL1-AS1	0.0996998	0.332944	0.161914	0.0862773	0.174752	0.382743	0.176402	0.233536	0.195358	0.120755	0.260849	0.181599	0.330041	0.239957	0.116493	0.153655	0.155352	0.0991154	0.138078	0.497795	0.111776	0.142376	0.0506013	0.204713	0.197084	0.330756	0.167063	0.214256	0.0198097	0.0938899	0.301823	0.165309	0.234641	0.274884	0.372836	0.219244	0.208281	0.171045	0.239619	0.164294	0.11922	0.244789	0.130742	0.44552	0.228675	0.435453	0.282221	0.678283	0.0901741
AC113139.1	0.0896881	0.479216	0.218482	0.0776135	0.269492	0.0983738	0	0	0.401692	0	0	0.217817	0.197932	0	0	0.138226	0.559009	0.0891624	0.0993701	0.268685	0.0804416	0.0731878	0	0.210464	0.0590978	0.85012	0	0.192741	0.0712819	0	0	0.0991391	0.0844315	0.164853	0.479138	0.315565	0.149893	0.184643	0	0.0591184	0.0714989	0	0.470453	0.253125	0	0.195863	0	0.37549	0.162238
AC008870.2	0.418661	0.503317	0.339955	0.163034	0.419327	0.482166	0.14815	0.196133	0.257825	0.101415	0.383376	0.355867	0.230985	0.134351	0.293508	0.19357	0.478396	0.312155	0.16235	0.35536	0.131424	0.102492	0.113326	0.540343	0.16552	0.277783	0.400876	0.164947	0.11646	0.2681	0.354878	0.20825	0.157649	0.500195	0.894641	0.110478	0.314862	0.143651	0.226398	0.234568	0.200253	0.051396	0.636857	1.28005	1.63244	1.27999	0.711066	0.920207	0.227196
AP001893.1	0.355284	0.316388	0.528903	0.102484	0.355849	0.259794	0.209539	0.123291	0.198904	0.0409822	0	0.215711	0.130679	0.253361	0.276752	0.319408	0.492092	0.0588668	0	0.413913	0.159328	0.193281	0	0.486335	0.0390176	0	0.170096	0.127252	0.0941236	0.133832	0.143408	0.261815	0	0.272099	0.506139	0.104171	0.148443	0.0406351	0.142315	0.0390312	0.0944101	0	0.310603	0.724181	0.271631	0	0	0.247906	0
AC022893.1	0.132877	0.263553	0.073566	0.0836275	0.145187	0.211993	0.0712435	0.0565908	0.12173	0.0501625	0.0790117	0.176021	0.19994	0.051686	0.338746	0.0651595	0.326259	0.126093	0.220832	0.150783	0.0920919	0.0640729	0.126705	0.177166	0.0835761	0.171749	0.485796	0.0908582	0.0864059	0.104657	0.243794	0.12685	0.0682304	0.216483	0.180693	0.0425021	0.105989	0.041448	0.108871	0.0636992	0.081854	0.0444882	0.221772	0.403427	0.110826	0.448459	0.136777	0.379299	0.163884
MIR17HG	0.147323	0.349851	0.184425	0.116865	0.178298	0.242385	0.0651658	0.063905	0.13059	0.0594782	0.056211	0.193802	0.0406407	0.236383	0.095632	0.122986	0.267818	0.109844	0.163226	0.232932	0.104606	0.075137	0.0830797	0.259283	0.0849403	0.442199	0.0470215	0.0571637	0.0683016	0.0878672	0.193263	0.169632	0.104016	0.208734	0.419754	0.226778	0.241086	0.117949	0.140155	0.105201	0.176167	0.211	0.701934	1.01637	1.26714	1.30031	0.208514	0.436889	0.410845
AL356124.1	0.0248096	0	0.080582	0.0214695	0	0.0544244	0.0877928	0.0258283	0.0833372	0.0171708	0.0324551	0.0301263	0	0.0265384	0	0	0.0257722	0.0493282	0.0274878	0	0.0222518	0.0202452	0.033578	0	0.0163476	0.141096	0	0.0355441	0.019718	0.0186911	0.0400567	0.0274239	0.0233555	0.0228009	0	0.0436458	0.0207317	0	0	0.0163533	0	0.121828	0.104109	0.116699	0	0.325078	0	0.207736	0
PRR7-AS1	0.126017	0.224442	0.102326	0.0218103	0.227191	0.138221	0.0594576	0.131191	0.01411	0.0959383	0.0494554	0.122418	0.0973371	0.175238	0.0196324	0.0679751	0.130906	0.100223	0.0418862	0.188758	0.113025	0.0616998	0.0255833	0.162643	0.0664285	0.0955573	0.0965308	0.0902707	0.020031	0.0949386	0.0508657	0.0835776	0.0355893	0.0810699	0.228893	0.0554233	0.147425	0.0864779	0.0302869	0.0415323	0.0803679	0.123761	0.290845	1.17366	1.04053	0.908154	1.42687	0.158275	0.182363
AL021707.2	0.217036	0.295597	0.228068	0.0441921	0.300497	0.343078	0.135532	0.186074	0.128654	0.0971954	0.108558	0.186033	0.211312	0.198018	0.238676	0.122975	0.225457	0.164995	0.19803	0.191232	0.131682	0.135435	0.125273	0.224692	0.117773	0.242024	0.507315	0.123462	0.157274	0.11061	0.231895	0.211682	0.16225	0.158398	0.388761	0.101069	0.149357	0.153319	0.214786	0.0799454	0.122131	0.10971	0.167418	0.35431	0.263542	0.195163	0.481855	0.734934	0.0923761
AL355075.2	0.582973	0.678889	0.619032	0.155227	0.898307	0.393495	0.317377	0.280113	0.552327	0.18622	0.410646	0.490088	0.593797	0.623597	0.20959	0.172782	0.698761	0.490393	0.397481	0.492588	0.201104	0.256157	0.18208	0.420929	0.236391	0.42506	0.687025	0.289112	0.106923	0.202708	0.434423	0.198278	0.0844315	0.329707	1.43741	0.157782	0.337258	0.276965	0.485002	0.177355	0.107248	0.330311	0.658634	1.64532	0.411424	1.5669	0.169254	1.50196	0.567833
AOAH-IT1	0.0374092	0.133255	0	0.0323728	0.149875	0.041032	0	0.0778905	0.0418868	0	0.244688	0	0.165116	0	0	0.0576542	0.0777214	0.11157	0	0.0373564	0.13421	0.0305269	0	0.175571	0	0	0	0	0.0297319	0.0563667	0.0905996	0.165405	0.0352166	0.0343804	0.19985	0.0329057	0	0.0770152	0	0.0246584	0	0.734793	0.549436	0	0.514819	0	0	0.078309	0
AL353804.2	0.0617737	0.330065	0.100321	0	0	0.135512	0	0	0.0691675	0.128261	0	0	0.068164	0.132157	0.0962383	0	0.192512	0	0	0	0.11081	0.0504089	0.0418032	0	0.0407042	0	0.118299	0	0	0.0465391	0.0498689	0.136566	0.0581531	0.113545	0.132005	0.108674	0.0516201	0.0423916	0	0.0407184	0.0492456	0	0.129612	0.174343	0.283373	0.674513	0.932605	0.129311	0
MACC1-AS1	0	0.0896186	0	0	0	0	0	0	0	0	0	0.0407342	0	0.0358829	0	0	0.0696938	0	0.0743332	0	0.0601738	0	0	0.0393591	0	0	0	0.0480596	0	0	0.0270806	0	0.0315792	0	0	0	0.0280316	0	0.0403114	0	0	0	0.105576	0	0.307763	0	0	0	0
LINC00578	0.191078	1.17565	0.63473	0.255546	0.591543	2.17204	1.86457	1.26588	5.01806	0.120223	0.477201	1.96168	3.68019	0.241555	5.27712	0.481885	1.29922	0.138151	2.48272	0.190808	0.420656	0.963897	0.693547	0.387244	0.320488	0.493951	6.37036	0.684382	0.717902	0.314082	1.34622	0.115207	0.245289	0.686466	0.315517	0.825097	0.101609	0.417217	1.23159	0.1832	0.443131	0.810341	1.67655	0.522934	0.478106	0.303476	0	0.436347	0.691286
AC110813.1	0.00970369	0.492557	0.228504	0.0335892	0.077753	2.36284	0.137353	0.393984	0.814886	0.120887	0.0380823	0.683427	2.00231	0.0311397	1.26988	0.00747757	0.46369	0.00964681	1.3224	0.04845	0.139252	0.403842	0.275799	0.0113855	0.019182	0.294329	4.11612	0.43097	0.455023	0.109659	1.13588	0.0643574	0.00913496	0.0445903	0.0414718	0.187782	0.0162175	0.0266363	0.151592	0.0383774	0.0541501	0.0476501	0.0814401	0.00912886	0	0	0	0.0609385	0
MRPS9-AS1	0.387176	0.313444	0.200066	0.121837	0.387791	0.11582	0.0415178	0.219859	0.0394107	0.146163	0.184179	0.170963	0.34955	0.150602	0.109671	0.189861	0.219381	0.279932	0.15599	0.140592	0.157845	0.114889	0.262008	0.289086	0.139156	0.266901	0.202215	0.176495	0.139872	0.238656	0.198902	0.194534	0.198809	0.549918	0.601716	0.278645	0.235299	0.193233	0.0845944	0.139205	0.0841785	0.0864196	0.147702	0.629142	0	0.768657	0.132846	0.442079	0.191009
AC036214.2	0.677894	1.18654	1.08193	0.606858	0.772622	0.640985	1.51651	0.632723	0.785206	0.598599	0.489269	0.823168	0.619051	0.775141	0.582677	1.13482	0.849892	0.813351	0.880569	0.770307	0.817662	0.78208	0.743477	0.959942	0.785543	1.86118	0.335739	0.468856	0.705978	0.986202	0.660478	0.801005	0.858218	1.03119	0.874153	0.925272	0.644604	1.18706	0.617991	1.23265	0.857207	1.6644	0.833784	0.571763	1.71569	1.3783	0.441131	0.685054	3.34047
AP000553.2	0.0996998	0.399532	0.0404784	0.0862773	0.0499291	0.109355	0	0	0.0558165	0	0	0	0	0.0533237	0	0	0	0.0991154	0.0552313	0.0497795	0	0	0	0	0.0985421	0	0	0	0	0.0751119	0.0804861	0.0551029	0.0469282	0.0458139	0.0532623	0.0438488	0.0833124	0	0.0599047	0	0	0	0.104594	0.234484	0	0.217727	0.376295	0.313054	0
AC007390.1	0.146548	0.351358	0.205958	0.112185	0.175008	0.18547	0.0997278	0.152565	0.1704	0.0975253	0.19171	0.15742	0.180367	0.180877	0.131717	0.125959	0.316179	0.151292	0.137388	0.208255	0.136495	0.119587	0.137314	0.21824	0.115134	0.256444	0.19969	0.133241	0.0940741	0.118899	0.232062	0.218064	0.132653	0.305627	0.373383	0.123948	0.20253	0.220474	0.2032	0.12632	0.116827	0.0968727	0.248352	0.466626	0.206848	0.615451	0.0425472	0.318569	0.193721
HM13-IT1	0.842967	0.536201	0.537817	0.416846	1.02523	1.12273	0.497164	0.376106	0.471932	0.166692	0.393838	0.65804	0.597967	0.515262	0.469027	0.324791	0.688031	0.419013	0.200136	1.14241	0.216017	0.343942	0.407464	0.777122	0.198376	0.456581	0.403579	0.388189	0.38284	0.226813	0.631906	0.332784	0.340098	1.16208	1.47968	0.370744	0.704411	0.413199	0.506497	0.158756	0.480006	0.887015	1.51602	2.37909	2.20967	2.36686	2.04531	1.63855	0.217836
C1RL-AS1	0.534655	0.673463	0.451281	0.334831	0.78212	0.582575	0.2199	0.410133	0.425356	0.270224	0.34971	0.448483	0.423066	0.647164	0.361675	0.379474	0.621172	0.412628	0.342952	0.825439	0.362805	0.281294	0.373711	0.511759	0.447326	0.386753	0.215555	0.201576	0.184509	0.397499	0.508288	0.388813	0.350999	0.60128	0.924531	0.380565	0.449715	0.405524	0.718581	0.408066	0.445853	0.181362	0.701124	1.4924	0.709967	1.47485	0.916039	0.91303	0.362679
AC034229.4	0.097213	0.0432852	0.157875	0.126188	0.0973675	0.159941	0.114668	0.0506023	0.0544243	0.0672814	0.190757	0.354138	0.107269	0.103987	0.0757249	0.0374557	0.20197	0.144965	0.215415	0.194152	0.0871906	0.158657	0	0.0570306	0.192168	0.184289	0.0465416	0.0348187	0.154525	0.183096	0.117718	0.0537284	0.0457577	0.312698	0.155801	0.213775	0.162469	0.100067	0.233642	0.128157	0.116246	0	0.0509924	0.274363	0	0.424592	0	0.101748	0
GPRC5D-AS1	1.2048	1.15673	1.29931	0.591894	0.578219	1.19759	1.08805	0.927641	0.555061	0.590643	1.18207	1.05915	0.484691	0.845749	0.694094	1.26689	0.632294	0.879591	0.771718	0.94619	0.956774	0.880739	0.75586	0.971857	1.00888	1.3799	0.222313	0.683245	0.349106	1.21023	0.744662	0.589582	1.06921	1.06112	1.22023	0.463647	1.2742	1.17128	0.897342	0.864468	0.865417	0.95522	1.72476	2.04254	1.7559	1.20591	1.13682	1.65508	1.1578
AC093278.2	1.55267	1.45182	1.18373	0.93308	0.812127	1.63681	0.46804	0.808212	0.666429	0.770135	1.20741	1.16267	0.885199	1.13492	1.77388	1.32941	1.21865	1.43209	0.984384	0.9389	1.12181	0.929147	1.09742	1.48778	0.954887	1.58618	0.982881	0.784745	0.74727	0.961795	0.821703	1.17279	0.795797	1.06229	1.235	1.16089	0.901015	1.00631	1.23353	1.16559	0.667025	0.783619	0.886837	0.576162	0.87053	0.565126	0.19534	2.96131	0.156036
AC016831.4	0.0214569	0.0191079	0.0174231	0.0092841	0.021491	0.0823721	0	0.0670139	0.0240251	0.0594016	0.196485	0	0.0473532	0.0344282	0	0	0.300908	0.0106656	0.0237732	0.12856	0.0192448	0.0437735	0.0145202	0.0377635	0.0353463	0.0406764	0.0102727	0.0230556	0.0170534	0.0161652	0.0692873	0.0355769	0.0201993	0.0197197	0.126092	0.0566216	0.0896505	0.00736231	0.206278	0.0353586	0.0855267	0	0.0112551	0.0908363	0.0984288	0.7263	0	0.044916	0
SNHG12	2.4057	3.33502	2.05137	1.02168	3.26779	1.74055	2.71037	1.59917	1.39302	1.25204	1.82679	2.11964	1.0226	3.13689	0.860331	1.21793	2.15616	2.05084	1.14633	2.08538	0.728714	0.766598	1.18984	2.04064	1.3886	2.58711	0.711107	1.69601	0.99383	1.2529	2.16242	2.83461	1.30863	1.73257	4.51003	2.18309	1.73446	1.79463	3.0206	1.08365	1.23974	2.61823	2.56374	7.58974	5.32853	4.57439	6.73197	7.83948	4.69616
YEATS2-AS1	0.190042	0.215923	0.122388	0.0623803	0.203472	0.208447	0.0231895	0.0614004	0.0660379	0.0725677	0.025718	0.135278	0.0723109	0.0700984	0.102093	0.136345	0.306335	0.084692	0.0798667	0.18323	0.105796	0.0802135	0.062085	0.192223	0.0906792	0.198768	0.119221	0.0657201	0.0364582	0.0543075	0.116386	0.101412	0.0431837	0.186701	0.231059	0.0576429	0.114997	0.0854442	0.102374	0.0820717	0.135828	0.128718	0.24062	0.530188	0.120245	0.629683	0.197869	0.438971	0.320062
AC008456.1	0.0293235	0.104453	0.0476217	0	0	0	0	0	0	0	0	0	0.0323569	0.0313669	0	0	0.152306	0.0291516	0	0.0292821	0	0	0	0.206434	0	0.0555892	0	0	0	0	0.0236724	0.0648269	0.0276048	0.0808481	0.0626616	0	0	0	0	0	0.046753	0	0.492206	0.468969	0.26903	0.320186	0	0	0
AC024361.1	0.500829	0.327066	0.433787	0.231148	1.10357	0.109866	0.157535	0.312836	0.0747698	0.231083	0.174712	0.567613	0.331583	0.214291	0.208067	0.205831	0.624313	0.199157	0.554894	0.433439	0.32941	0.163476	0.0903783	0.235051	0.0880023	0.316478	0.159851	0.28701	0.0796092	0.276697	0.323449	0.147628	0.220022	0.337539	1.1059	0.0881074	0.111602	0.206213	0.240738	0.198074	0.239555	0.32791	0.105082	1.13078	0.61265	0.364573	0.630089	1.04839	0.181191
AC025857.2	0.36026	2.24574	0.950733	1.32497	1.62375	1.97574	1.59355	1.12516	1.91606	1.18435	0.942563	1.85922	1.29197	2.1195	0.140314	1.11045	1.87119	1.61167	0.598726	1.07925	0.807795	1.02893	1.15802	2.00781	0.356077	1.36591	0.603673	1.22582	1.1453	0.610679	1.89041	1.59289	1.01744	2.23487	1.82838	0.792226	0.827873	1.48335	1.08231	1.12797	0.933391	1.54793	3.49598	4.06702	7.8499	5.31052	2.37951	6.97575	5.53927
Z82243.1	0.135954	0.524638	0.294389	0.196085	0.181561	0.0994137	0	0.0943579	0.152227	0.125459	0.0592838	0	0.0500061	0.387809	0.141204	0.174608	0.094153	0.0450524	0.150631	0.0452541	0.0812919	0.110942	0.184005	0.797584	0.119445	0.515464	0.173572	0.162316	0	0.341418	0.439015	0.200374	0.042662	0.166596	0.290522	0.15945	0.189346	0.248793	0.217835	0.0896149	0.325146	0.111268	0.285255	0.554236	0.415773	0.8907	0.171043	0.853783	0.901741
AC004943.2	0.947375	0.942217	1.0245	0.877296	0.948881	0.786625	0.349866	0.617575	0.436204	0.379927	0.619664	0.983753	0.47384	0.549315	0.586235	1.0473	0.942745	0.68216	0.750448	0.848781	0.603528	0.606906	0.75794	0.997293	0.647586	0.637818	0.495954	0.320293	0.256847	0.763762	0.886311	0.371905	0.779326	1.20836	0.841945	0.49065	1.04691	1.11798	0.750107	0.773288	1.37285	0.967375	1.16107	0.87043	1.58401	1.05378	1.13619	0.546756	0.512514
AL049539.1	0	0.207939	0	0.0404131	0.0467746	0.051223	0	0.048618	0	0.0323215	0	0.113417	0	0	0	0.0719736	0.0485124	0	0	0	0	0.0762174	0.0632058	0.109588	0.123088	0.177062	0	0.133813	0.0371163	0	0.113101	0.103243	0	0.128758	0.0498972	0	0.0780487	0	0	0.123131	0	0.114661	0.195971	0.175736	0.428455	0.917867	0	0.293275	0.168954
AL137058.2	0.261143	0.290692	0.265062	0.0941605	0.239761	0.167086	0.179686	0.294521	0.365499	0.10543	0.199278	0.105702	0.408223	0.186227	0.372936	0.150925	0.271275	0.216343	0.192889	0.260774	0.136628	0.124308	0.147266	0.255335	0.157734	0.165018	0.479261	0.155889	0.138367	0.22953	0.210816	0.19244	0.184378	0.22	0.209264	0.172279	0.254589	0.224008	0.313815	0.1291	0.260227	0.320586	0.547922	0.266146	0.199656	0.380193	0	0.136663	0.275557
AL117379.1	0.569924	0.50753	0.668462	0.273997	0.507404	0.347287	0.224086	0.494438	0.106357	0.328705	0.372779	0.69206	0.593943	0.778983	0.295965	0.39038	0.920947	0.566583	0.526207	0.69559	0.170389	0.258374	0.214265	0.445799	0.625895	0.780302	0.151587	0.340215	0.50329	0.405516	0.255606	0.594981	0.119227	0.727474	0.879576	0.473463	0.449789	0.67357	0.60878	0.417409	0.605787	0.855133	0.597899	2.62124	2.6144	4.77101	0.478012	5.16978	0.801844
AC004837.2	0.146617	0.235019	0.166676	0.0761271	0.11748	0.0321633	0.0345887	0.0915827	0.0656665	0.0405898	0.11508	0.14243	0.291212	0.0313669	0.0456836	0.0451927	0.24369	0.174909	0.064978	0.117128	0.210403	0.0478574	0.0396873	0.516084	0.0579659	0.277946	0.0842334	0.0840221	0.0466111	0.110459	0.260396	0.226894	0.110419	0.242544	0.250646	0.0515868	0.147022	0.040246	0.0704761	0.0773149	0.0701295	0.143993	0.184577	0.275864	0.53806	0.448261	0	0.429682	0.530436
AC009996.1	0	0.292324	0.15993	0.0568136	0.19727	0.216031	0.0387203	0.068348	0.0367552	0.0908763	0.0429422	0.119582	0.108666	0.105341	0.0511404	0.0758864	0.204599	0.0652674	0.0363698	0.0983394	0.0883256	0.026787	0.0666419	0.192576	0.15141	0	0.125727	0.0940585	0.104358	0.0741917	0.371	0.362852	0.0618044	0.0603369	0.455952	0.230995	0.0822917	0.180213	0.27613	0.108188	0.20935	0.24179	0.344374	0.524987	0	0.358432	0	0.206146	0.296898
AL354892.3	0.197259	0.269351	0.12814	0.0682808	0.237087	0.129817	0.108583	0.150596	0.103072	0.109219	0.292455	0.223563	0.14511	0.168804	0.0819502	0.141872	0.177591	0.078441	0.291404	0.262641	0.0707688	0.0751186	0.160186	0.262306	0.173305	0.274229	0.163695	0.103623	0.229939	0.0891666	0.138011	0.247118	0.074279	0.302147	0.421524	0.0347024	0.296705	0.225612	0.126425	0.216707	0.241122	0.226016	0.0827766	0.371147	0.180976	0.258467	0.347438	0.440452	0.0713648
AC009120.3	1.0864	0.706991	0.712515	0.180796	0.837019	1.05411	0.246436	0.348002	0.187143	0.231354	0.273306	0.558129	0.507177	0.223481	0.260388	0.579577	1.34558	0.373856	0.370362	0.917962	0.262337	0.443264	0.282763	0.490263	0.523125	0.633696	1.08026	0.359182	0.166047	0.692553	0.775836	0.96994	0.35402	1.34405	1.20541	0.183772	0.523748	0.802879	0.60255	0.275425	0.532966	0.205183	0.482191	1.57237	0.191677	1.095	0.315413	1.92429	0.302338
AL355388.1	0.228565	0.398236	0.161388	0.146196	0.169208	0.228901	0.0703319	0.124148	0.100144	0.165069	0.247002	0.168942	0.0548282	0.297644	0.123856	0.160814	0.340666	0.128432	0.187177	0.377097	0.133696	0.0567655	0.188299	0.116599	0.163704	0.301424	0.10467	0.142374	0.08688	0.112302	0.112315	0.109848	0.0841967	0.191794	0.339773	0.0524478	0.15778	0.197769	0.203015	0.104807	0.0713	0.0487988	0.156381	0.448749	0.27352	0.629358	0.0750148	0.603273	0.197739
LINC02576	1.41894	0.657071	0.629863	0.474792	0.757971	0.498034	1.27203	0.610578	0.550776	0.209505	0.618739	0.712183	0.22964	1.90233	0.471593	1.07884	0.845091	0.99684	0.167693	1.54919	0.746623	0.741051	0.588935	0.976718	0.88511	1.36289	0.0543465	0.0271051	0.315767	0.356334	0.274917	0.669211	0.676794	1.18235	0.909644	0.732233	1.05924	0.727056	0.272823	0.486357	0.392139	0.139354	0.158783	0.783132	0.34715	0.0826324	0.214219	0.237622	0.0342232
AC010761.1	1.1445	1.4014	1.12295	0.866612	1.31349	0.9415	1.35	0.595746	0.587346	0.379553	0.842173	1.04232	0.473584	1.30077	0.780076	0.771695	1.65951	0.900748	0.8982	1.26193	0.556022	0.52534	0.613145	1.70654	0.691293	1.22043	0.662092	0.427003	0.416908	0.682608	0.654453	0.527124	0.718279	1.46819	2.67497	0.713092	0.996227	0.85085	0.544406	0.392917	1.06445	1.34647	1.45082	1.74963	3.06257	1.87453	2.69978	3.64359	0.77636
AC087277.2	1.84544	5.30946	3.91917	2.4569	1.84837	0.934226	0.334892	0.738928	0.317895	3.53695	1.11422	3.27519	0.783209	1.51849	1.10578	1.42207	2.06451	2.39912	1.41553	1.55932	0.254643	1.04256	1.15277	1.16592	1.12247	2.69111	0.135926	0.406756	1.80518	2.032	1.03139	5.17821	1.60364	1.56556	6.52199	1.12381	0.830365	2.24058	0.511768	2.33929	1.58434	0	0.148925	0.400642	0	0.620016	2.14314	0.594318	0
AL133406.2	0.715708	1.38625	0.770036	0.247741	0.681004	0.549514	0.295476	0.353921	0.220378	0.210521	0.678795	0.477997	0.612054	0.459349	0.390255	0.482578	1.35685	0.40912	0.257715	0.821903	0.738209	0.350422	0.544873	1.36459	0.518758	0.712313	0.137061	0.281979	0.142207	0.404401	0.346668	0.771348	0.25266	1.57863	1.83528	0.157387	0.478455	0.368361	0.537542	0.31844	0.385127	0.351449	0.469275	1.63278	0.902867	1.21131	0.675321	0.374549	0.647327
AC020915.3	0.957788	1.22653	0.951273	0.883642	0.713537	1.39783	0.868332	1.38443	1.2231	0.701237	1.58431	1.06692	0.777366	0.922925	0.912558	0.902753	1.31564	1.03087	1.15766	0.743017	0.511166	0.87847	0.771353	1.19808	0.667621	0.765297	1.06869	0.533004	0.786391	1.01975	0.773208	1.08496	0.864394	1.12031	1.0149	0.640568	1.29645	0.961467	1.30317	0.72003	0.725682	0.583045	0.705853	2.33082	1.45244	0.933459	2.03155	1.70669	1.6896
DLEU2	0.37385	0.452624	0.245583	0.4253	0.307128	0.345552	0.317107	0.40232	0.343343	0.377939	0.318713	0.346851	0.259566	0.476287	0.209412	0.424035	0.493081	0.28814	0.432824	0.520134	0.207212	0.236516	0.335425	0.349928	0.340446	0.597233	0.120664	0.21665	0.183618	0.215194	0.498484	0.264662	0.181901	0.478699	0.412906	0.513589	0.319421	0.322851	0.297821	0.213199	0.368353	0.577553	0.51559	1.07882	0.732227	2.58686	0.0158541	0.509998	0.78264
AL353807.2	0.194868	0.0867671	0	0	0.195178	0	0.114929	0.202869	0	0.134869	0.12746	0	0.107513	0.104224	0	0	0	0.0968627	0	0.0972964	0	0	0	0.11432	0	0.184708	0	0.0697957	0.154876	0	0	0.107701	0.183447	0	0.104104	0.0857045	0.081419	0.133726	0	0.0642241	0	0	0.30665	0.183324	0	0.212778	0	0.203959	0
AC108727.1	0.0545432	0.437147	0.132868	0.1416	0	0.119651	0	0.113566	0.0610715	0	0.0713518	0.0662319	0.240742	0.116688	0.0849738	0.0420304	0.283297	0.0542234	0.0604312	0.108932	0.0978399	0	0.0738204	0.319981	0.0359399	0.413595	0.104452	0.156285	0	0.0821835	0.176127	0	0.0513464	0.100254	0.116554	0.0479771	0.045578	0.0374298	0	0.0719048	0	0	0.171661	0.667057	0	0.238225	0	0	0.295991
LINC02163	0.037344	0	0	0	0	0	0	0	0	0	0	0.0453469	0	0	0	0	0	0	0	0.0372913	0	0	0	0	0	0	0	0	0	0	0	0	0	0	0	0	0	0	0	0	0	0.366756	0.352594	1.29988	0.856536	1.46795	0.140947	0.0781725	0
AC002398.1	0.953803	0.894087	0.733731	0.73851	1.257	1.32148	0.473711	0.783922	0.618296	0.868592	0.656703	1.52395	0.720112	1.07397	0.70387	1.16051	0.990811	1.44727	1.61296	0.952456	0.765419	0.655434	0.917223	2.47382	1.02542	1.52265	0.769082	0.575365	0.279285	0.416018	1.05367	0.94333	0.945159	1.47635	1.07273	0.662353	1.00677	0.964583	0.965209	0.99269	0.600289	0.986034	1.42193	1.6057	3.45423	5.48141	0.18947	2.41694	1.36211
MHENCR	2.97046	3.88448	2.15127	1.04211	3.27002	2.78849	2.49371	2.73025	1.94766	0.963107	2.87064	2.37219	1.38787	3.03432	1.33412	1.89719	2.25174	2.15492	2.28303	3.04643	1.58413	1.74701	1.3401	3.01429	1.83387	2.94241	1.10183	1.30355	1.08471	1.89515	2.03074	1.95233	2.51924	3.78751	4.68921	1.76545	2.72819	2.33228	2.89427	1.25241	1.94136	7.49035	3.98657	9.94436	24.3064	13.2661	11.3124	9.80328	2.61404
C9orf147	0.187155	0.166666	0.101314	0.0647833	0.0249936	0.0821118	0.0883038	0.18185	0.111763	0.0431768	0.0979321	0.121207	0.0550708	0.133464	0.174943	0.0673024	0.155533	0.0744231	0.0552956	0.161972	0.0783345	0.111997	0.0928771	0.102476	0.0986568	0.118265	0.131416	0.0715019	0.0396656	0.0845993	0.141015	0.0965423	0.105711	0.103201	0.106649	0.0438999	0.114688	0.102747	0.074968	0.0822427	0.0994658	0.183805	0.0654471	0.16433	0.114471	0.299723	0	0.391773	0.0677093
AC073111.1	0.15311	0.363596	0.124327	0	0.102236	0.167938	0	0.159397	0	0.0706455	0.267059	0.0619741	0.0563164	0.109187	0.0795112	0.0786569	0.212068	0	0.169639	0.305789	0.137325	0.208237	0.241762	0.119764	0	0.0967518	0.0488687	0.0365596	0.0405628	0.0384502	0.288409	0.0564149	0.144137	0.281428	0.381713	0.0448928	0.127944	0.280189	0.245324	0.0672823	0.0406863	0	0.374794	0.192054	1.1706	0.334366	0.385255	0.534179	0.184642
AC010525.1	0	0.173141	0.118406	0.126188	0.730256	0.106627	0.0573341	0	0.0544243	0.134563	0.0635856	0.295115	0.0536347	0.0519936	0	0.187278	0.353447	0.289929	0	0.145614	0.0871906	0.0396642	0.0986784	0.114061	0.192168	0.184289	0	0.208912	0.231787	0.109858	0.0784785	0.429827	0.183031	0.223356	0.363537	0.128265	0.0812343	0.166779	0.175231	0.0961176	0.193744	0	0.152977	0.32009	0.222971	0.424592	0.733818	0.305245	0.0879249
AC005519.1	0.297932	0.460811	0.445648	0.122126	0.486873	0.395582	0.166466	0.212219	0.245805	0.141084	0.184617	0.456985	0.0865139	0.117414	0.342009	0.0725001	0.325782	0.140299	0.138987	0.313171	0.168768	0.115162	0.148559	0.202381	0.0929915	0.267536	0.285276	0.0673959	0.0373878	0.177203	0.265834	0.259995	0.162378	0.302633	0.569638	0.206895	0.222756	0.258257	0.358026	0.15504	0.187508	0.1925	0.608663	0.649077	0.431589	1.60946	0.769382	0.623665	0.17019
AL358072.1	0.186395	0.365176	0.151354	0.193561	0.22403	0.327114	0.0439727	0.116429	0.125223	0.0516019	0.0487674	0.22634	0.123407	0.0797537	0.0580777	0.143634	0.116177	0.259424	0.12391	0.223359	0.0334357	0.121683	0.126137	0.04374	0	0.141342	0.0356954	0.0267044	0.0888854	0.0280853	0.0902844	0.247244	0.0701883	0.137043	0.0796619	0.0983739	0.0623032	0.0767473	0.0895965	0.0491454	0.0594373	0	0.0391089	0.210424	0	0.0814108	0	0.46822	0.202304
AC090517.2	0.0945682	0.449147	0.15358	0.163673	0.536738	0.31118	0.409011	0.328171	0.105887	0.283621	0.371134	0.267947	0.243486	0.202316	0.392879	0.291493	0.327458	0.344717	0.314331	0.377739	0.339274	0.257234	0.191988	0.443832	0.37388	0.418309	0.211285	0.316133	0.100214	0.213738	0.22903	0.104533	0.207726	0.347647	0.437848	0.277279	0.342438	0.411012	0.227285	0.311675	0.175908	0.232189	0.19842	0.533797	0.43381	0.3442	0	0.263947	0.513197
AL121583.1	0.188582	0.279894	0.15313	0.0815966	0.188882	0.206845	0.0741476	0.196325	0.0703845	0.174024	0.164465	0.305327	0.20809	0.537928	0.195863	0.290638	0.424448	0.187476	0.139293	0.125544	0.16914	0.153888	0.191424	0.331898	0.165682	0.595832	0.240761	0.652927	0.0999201	0.118395	0.0761196	0.277938	0.118353	0.202199	0.235073	0.138233	0.236378	0.258825	0.302158	0.331479	0.200448	0.154339	0.296758	0.798347	1.00926	0.411829	0.35588	3.02649	0.0568546
AC007038.1	0.608304	1.03182	0.211691	0.325872	0.522232	0.444809	0.307512	0.180938	0.227038	0.380913	0.568403	0.844188	0.319634	0.557737	0.406152	0.245537	1.20363	0.201579	0.641877	0.376037	0.181863	0.354565	0.235228	0.339871	0.248131	1.20809	0.610199	0.14525	0.207199	0.218231	0.67815	0.576346	0.409037	0.772027	0.711844	0.382196	0.314673	0.397565	0.730999	0.324592	0.323291	0.284484	0.455831	1.4443	0.664394	1.77124	0.109329	0.848911	0.261992
LINC01091	0.0826666	0.0564393	0.0626507	0.0429224	0.0800381	0.102762	0.172268	0.111879	0.111073	0.0419568	0.118956	0.0836519	0.0942589	0.0560039	0.120202	0.108294	0.111636	0.068485	0.0793786	0.107315	0.0642581	0.0809498	0.0652655	0.0484969	0.049024	0.0731328	0.0580469	0.106591	0.0897919	0.0913432	0.111226	0.0731022	0.0830097	0.0810387	0.117767	0.104225	0.0875	0.0699661	0.1457	0.0762862	0.0593112	0.0676559	0.153213	0.451064	0.101124	0.084247	0.0312007	0.155742	0.0847375
AL359076.1	2.09251	2.22702	2.11355	1.50164	2.70925	2.12722	2.46823	2.60349	3.42873	1.2363	2.00295	1.85922	3.15372	2.23833	1.51071	1.29784	3.07499	1.31918	2.60113	3.56753	1.14438	1.49931	1.9341	3.95222	1.84962	3.67657	2.3457	1.38927	1.46026	1.3073	2.84288	2.6515	1.29723	2.57976	2.89012	1.39168	1.57798	1.68113	1.53327	1.85026	2.44118	0.877159	2.24876	4.46525	2.3412	2.0062	1.54102	1.17519	2.40035
AC016949.1	0.0910211	0.310716	0.110864	0.0131278	0.21272	0	0.0178941	0.0157931	0.0339718	0.0734953	0.0595355	0.0736847	0.200874	0.0324546	0.0472678	0.0701399	0.173347	0.0904875	0.0336156	0.12119	0.0680309	0.0618963	0.164254	0.533981	0.0399841	0.258826	0.0145257	0.0978028	0.120569	0.0571446	0.0734799	0.435987	0.0571242	0.167304	0.226921	0.0533758	0.101414	0.145746	0.05469	0.0899955	0.0725615	0	0.0318296	0.171258	0.556718	1.22577	0.229026	0.349314	0.109766
AC002128.2	0.138741	0.741311	0.36614	0.180093	0.903249	0.342398	0.12274	0.0722189	0.11651	0.16804	0.181497	0.379065	0.191366	0.185511	0.0540367	0.213825	0.432372	0.137928	0.192148	0.311726	0.155546	0.028304	0.211248	0.406966	0.22855	0.131507	0.0332118	0.347849	0.165402	0.156787	0.560017	0.536763	0.195914	0.382524	0.963548	0.152549	0.260857	0.523653	0.375131	0.274355	0.0829526	0.255483	0.254714	0.848393	0.477332	0.681717	0.130912	0.726069	0.125485
ITPRIP-AS1	0.0674071	0.0800368	0.018245	0	0	0.024645	0	0	0	0.0311018	0.0587867	0	0.0495868	0.0240348	0	0.0346288	0.0233409	0	0	0.0448746	0.0201526	0.0733413	0	0.0790896	0.0148054	0.0425951	0	0.0321909	0	0.0169277	0.0181389	0.0496735	0.0423043	0	0	0	0	0.0462575	0	0.0148106	0	0	0.165004	0.147966	0.103072	0	0.339218	0.0470346	0
AL078581.2	1.00873	1.01058	1.07506	0.818366	1.32606	0.484057	1.04112	1.18142	1.76479	1.91989	1.48454	1.45457	0.904376	1.07902	0.491099	1.02023	0.982375	0.752111	1.25732	1.25913	0.565457	1.23472	0.682622	0.961636	1.28781	1.55372	0.724407	0.812914	1.10235	1.18743	0.559852	1.32409	1.00896	1.04294	0.808334	0.942749	0.790243	1.12487	1.06066	1.32982	1.40727	1.54793	0.793681	0.711729	0.578414	0.55072	0	0.527895	0.798306
AC006042.1	3.06805	3.97076	2.65736	0.637201	1.51598	1.8845	0.0482525	0.553632	0.458037	1.47223	2.51515	1.93728	1.35417	1.22522	0.701034	1.45005	2.84714	0.935354	0.951791	1.67483	1.4676	1.03483	1.41182	2.20787	1.42861	3.56726	0.352526	0.820498	1.0729	1.20193	1.75027	2.57743	1.34784	1.91737	3.75886	0.755639	2.0852	2.02121	2.40876	1.07857	1.43489	0.301314	1.6737	9.46708	1.68888	2.94804	2.62473	5.82296	1.77595
AP001793.1	0.0824441	0.0978911	0.13389	0.166471	0.1101	0.120571	0.0972474	0.114439	0.153853	0.0950997	0.0719006	0.166853	0.151621	0.146982	0.128441	0.148238	0.342572	0.245882	0.182688	0.10977	0.0985925	0	0.167374	0.451419	0.0362163	0.156291	0.210511	0.0787438	0.0218415	0.0828157	0.288409	0.0607545	0.0517414	0.227308	0.176175	0.0725192	0.068893	0.150871	0	0.036229	0.0876319	0.0674738	0.172982	0.413654	0.252129	0.360086	0	0.230108	0.447402
LINC01811	0	0.0168183	0	0	0	0.0207148	0	0	0	0.026142	0	0	0.0208396	0	0	0	0	0	0	0.0188592	0	0.0154114	0.0127804	0.022159	0.0124444	0	0	0.0135287	0	0.0142282	0	0	0	0	0.0201787	0	0.0157817	0	0	0	0	0.139109	0.356632	1.13709	0.173269	0.701137	0	0.355805	0.102489
AL360091.1	0.0432167	0.269398	0.0350922	0.149594	0.0865707	0	0.101953	0.0899824	0	0.0299104	0.0565348	0.314868	0.0953746	0.0924564	0	0.0333023	0.224468	0	0	0.0863113	0.0775223	0.0705318	0.0292454	0.15212	0	0.0819269	0	0.154789	0.068695	0.0325586	0.104664	0.0955413	0	0.158871	0.09235	0.0380141	0.0361132	0.0593141	0.1558	0	0	0	0.045338	0.243939	0.198247	0.188755	0.163112	0.271397	0
AC090579.1	0.978205	0.719616	1.65769	1.21456	1.53354	0.419845	1.75586	1.41687	1.19053	1.41291	0.945836	1.65264	0.844747	1.18285	1.19267	1.27817	1.36961	1.22616	0.706829	1.52894	1.60213	1.1106	1.20881	0.798428	1.00888	1.29002	0.325792	0.396063	0.878861	1.57005	0.274675	0.705186	1.52144	0.899007	0.772515	0.56116	1.49268	2.1306	1.6866	1.26154	1.83088	1.87963	0.669275	0.440124	0	0.185759	0	1.06836	0.153869
ANKRD10-IT1	5.30528	8.73311	5.24347	2.20277	5.44789	4.79044	1.51706	3.51471	3.24015	2.41078	5.04742	4.81539	4.99668	3.35339	2.62983	2.99388	9.01821	3.40957	3.47336	5.29779	3.12415	1.92411	2.88301	6.79063	2.77191	7.00967	3.1557	2.1689	1.63975	3.53261	4.32613	5.03503	3.25389	8.22475	8.81758	1.74409	4.47804	4.19232	5.73138	3.05546	2.47779	3.81564	6.26843	21.7789	5.89982	10.7666	1.01129	6.67457	7.12488
AC006001.2	1.02835	1.15998	1.44738	0.296636	1.0071	1.2282	0.808667	1.023	0.153525	0.427036	0.866947	0.915737	0.605192	0.708898	0.747643	1.07419	1.04452	0.658832	0.911493	0.524861	0.471415	0.48485	0.587652	1.31383	0.557145	0.389895	0.459512	1.24412	0.490386	0.688659	0.848622	0.404166	0.580849	1.09211	1.3185	0.663342	0.821133	0.956614	1.428	0.79835	0.947322	0.673299	1.46242	0.881441	1.99177	1.49716	1.46627	0.526206	0.248027
AC009093.1	0.0306367	0.00909422	0.0497543	0.0176747	0.0306854	0.0784085	0.0240918	0.0106316	0	0.0353396	0.0133593	0.0496029	0.0563433	0.0218477	0.0636393	0.0157389	0.0954762	0	0.0565733	0.0917803	0	0.0416672	0.0138216	0.0239643	0.0134582	0.0580787	0.166233	0.0146308	0.0162329	0.0615496	0.0164883	0.0903068	0.00961369	0.0375417	0.0436452	0.0359314	0.0597357	0.0490563	0.0368161	0.0201943	0.0162823	0.250736	0.449967	0.201753	0.421617	0.200715	0	0.192396	0.240149
MIRLET7BHG	0.26944	0.22328	0.218787	0.148967	0.22489	0.328371	0.176567	0.206482	0.150845	0.0828802	0.25946	0.331726	0.425323	0.184138	0.192393	0.152837	0.213808	0.267861	0.223895	0.22048	0.198028	0.140473	0.207659	0.149287	0.187404	0.212827	0.189912	0.19301	0.121943	0.157882	0.0966733	0.153053	0.151484	0.206355	0.32387	0.154711	0.171992	0.274783	0.188875	0.172669	0.161097	0.284832	0.141333	0.528081	0.446332	0.424962	2.23163	0.352513	0.331698
AC074117.1	1.09942	1.20843	0.99986	0.614334	1.76186	1.0474	0.941122	0.909107	0.597917	0.656556	1.0273	0.915444	0.928924	0.8669	0.743844	0.837516	1.36396	0.774448	0.800465	1.50564	0.738143	0.861266	0.680221	1.37841	0.674757	1.04805	0.493271	0.711048	0.674065	0.965536	1.15127	1.04166	0.857554	1.54159	1.26194	0.5084	1.27569	1.26319	0.875746	0.824071	1.0918	0.848366	2.12222	2.40546	2.99717	3.11435	1.47011	1.94634	0.681856
AC022306.3	0.233841	0.347069	0.221527	0.269813	0.234213	0.170992	0	0.162296	0	0.0539475	0.356888	0.189303	0.0430053	0	0.182153	0.0900979	0.2834	0.116235	0.604532	0.116756	0.174778	0.0954103	0.158244	0	0.128403	0.295533	0.111954	0.0279183	0.0619504	0.0880858	0.283165	0.0430804	0.146757	0.394	0.124924	0.0685636	0.162838	0.106981	0.234173	0.0770689	0.310695	0.0956901	0.490639	0.513308	0	0.170223	0	0.163167	0.0704998
AC010976.1	0.128379	0.145504	0.154788	0.0673308	0.116894	0.106676	0.0275329	0.0324002	0.0392033	0.110392	0.0865156	0.118099	0.0987326	0.0749048	0.048486	0.0659519	0.258639	0.0734821	0.0732742	0.132083	0.0662949	0.0476186	0.0737133	0.260177	0.0922826	0.250747	0.0596003	0.0836028	0.0556542	0.0615482	0.141325	0.206411	0.0622587	0.253847	0.386563	0.0410635	0.143037	0.0880992	0.121549	0.0846219	0.0527223	0.0573098	0.171412	0.42088	0.124921	0.399297	0.102781	0.309455	0.0703718
AC055822.1	0.578035	0.171584	0.58671	0.208423	0.192985	0.528345	0.340912	0.501475	0.21574	0.433398	0.693154	0.23397	0.584678	1.08205	0.450266	0.482547	0.70054	1.00563	0.960652	0.384813	0.475238	0.275153	0.554151	0.113036	0.698283	0.547898	0.184493	0.48308	0.689112	0.47177	0.233319	0.319473	0.136039	0.486966	0.51467	0.635561	0.362269	0.198336	0.636739	0.222258	0.422406	0.709612	0.454806	0.679741	0.662901	1.26233	0	0.100834	1.39415
AC016737.1	0.180636	0.268101	0.146677	0.0347371	0.0603077	0.132086	0	0.0626844	0.0449459	0.0972368	0.367582	0.219347	0.0885877	0.214693	0.156342	0.185595	0.166795	0.099765	0.066712	0.220466	0.0720057	0.0818909	0.0543285	0.0470983	0.105801	0.418533	0.115308	0.215661	0.0319033	0.120967	0.145825	0.110928	0.245626	0.350468	0.300224	0.035309	0.184489	0.220373	0.21707	0.0661484	0.0800011	0.197114	0.315838	0.66086	0.736557	1.1396	0.0757523	0.882296	0.18153
AC244093.5	0.0597088	0.159516	0.169694	0.0258351	0.239215	0	0.0704299	0	0.0334277	0.0413247	0.0390547	0.0725045	0.0988283	0.0319348	0	0.046011	0.0930383	0.0296794	0.0330772	0.0298123	0.053553	0.12181	0.0404059	0.140114	0.0590155	0.0565957	0.0285862	0.0641576	0.0237275	0.0674752	0.024101	0.099001	0.0562093	0.0548746	0.0956942	0.0525209	0.0249473	0.102437	0.035876	0.0196787	0.0237998	0.0733002	0.0939595	0.168515	0	0.0651967	0	0.187483	0
AL512652.1	0.0857418	0.114533	0.0696229	0.0370993	0.0858782	0.188091	0	0	0.0480022	0.0593422	0.0560825	0.156175	0.0946116	0.0458584	0.0667894	0.0660718	0.0890687	0.127859	0.0474989	0.0428104	0	0.0699676	0.0870343	0.100602	0.0847462	0	0.0410497	0.0307101	0.0340727	0.193789	0.103827	0.142166	0	0.1182	0	0.07542	0.0358243	0.0294198	0.051518	0.141293	0.0341765	0.105259	0.0899506	0.362982	0.786643	0.37449	0	0.538452	0
AC017083.1	0.087581	0.194982	0.0888954	0.132633	0.0877203	0.144094	0	0.068383	0.0490319	0.0454613	0	0.0531749	0.0483205	0.117105	0.102333	0.134978	0.159214	0.217669	0.0727767	0.109322	0.0981897	0.0357342	0.0444506	0.12845	0.100991	0.124522	0.0838605	0.0470532	0.0348036	0.0329909	0.159081	0.121012	0.10306	0.140858	0.140364	0.115557	0.0731856	0.0901526	0.157869	0.0432971	0.157093	0.0537585	0.06891	0.473759	0.401758	0.191261	0.413195	0.275001	0.0792132
AL133243.3	0.0713564	0.152507	0.121678	0.148199	0.242997	0.148707	0.0673351	0.0520005	0.0878869	0.143219	0.0653424	0.0953131	0.173224	0.167923	0.0778172	0.0769811	0.244613	0.134782	0.221366	0.142511	0.1088	0.133926	0.135206	0.452106	0.0658259	0.24349	0.102488	0.250465	0.136109	0.0860137	0.207378	0.212964	0.120914	0.163948	0.259219	0.106703	0.166958	0.107729	0.0257247	0.103477	0.119458	0.105119	0.172176	0.295369	0.130933	0.436323	0.0807957	0.343553	0.219432
AL035416.1	0.0279472	0.0746627	0.0453865	0.0241846	0.0279916	0.0613073	0	0	0	0	0.0365596	0	0.0925146	0.0597893	0	0.0430716	0.058063	0.0277833	0	0	0.0250659	0.0228056	0.0378246	0.0655815	0.0184151	0.10596	0.0267599	0.0200196	0.0222117	0.0631645	0.0676839	0.0308921	0.0526184	0	0.0597205	0	0	0.0575354	0.0335841	0.0184215	0.0222793	0	0.0586379	0.473249	0.256402	0	0	0	0.151662
FSIP2-AS1	0.0730754	0.0650753	0.0197792	0.0421582	0.195178	0.0534349	0.172393	0.076076	0.054548	0.0674343	0.223055	0.0591571	0.134391	0.0260559	0.0379485	0.168933	0.101214	0.0484314	0.053976	0.0486482	0.0218472	0.0795086	0.148354	0.257221	0.0481512	0.138531	0.0932948	0.0348978	0	0.110107	0.117985	0.430804	0.0917233	0.111932	0.234233	0.0214261	0.0610642	0.0501474	0.117086	0.0642241	0.0776738	0.119613	0.0766624	1.26035	0.558695	0.58514	0	0.152969	0
AC007128.2	0.0234012	0	0	0.0202507	0	0.0256674	0	0	0	0	0	0	0	0	0	0.0180327	0	0.023264	0	0.0233681	0.0209886	0	0.0158359	0	0.0154196	0	0	0	0	0.03526	0	0	0	0.0215065	0.0500061	0.020584	0	0	0	0	0	1.0342	0.0490997	0.550373	0.322043	0.306624	0	0.0489858	0
TH2LCRR	0.118976	0.158926	0.11271	0.0514791	0.198608	0.0217496	0.093559	0.0206435	0.0222027	0.0686196	0.10376	0.19263	0.153164	0.0424222	0	0.0764012	0.0617961	0.019713	0.0878796	0.217814	0.0355699	0.0647249	0.0805128	0.232659	0.0522641	0.187954	0.0759477	0.028409	0.0157598	0.074695	0.0480236	0.0876753	0.0373342	0.23691	0.296614	0.0523265	0.06628	0.1769	0.0953155	0.104565	0.0158078	0	0.0624079	0.335783	0	0.173215	0	0.0415088	0.215217
HCG18	1.25828	1.47438	1.01548	0.694378	1.47624	1.25682	1.41881	1.14641	1.07262	0.734423	1.13229	0.908906	1.63657	1.21417	1.14691	0.760741	1.4223	0.959997	1.18935	1.67483	1.03739	0.960181	0.929667	1.55225	1.01381	1.1737	1.20483	1.09332	0.802979	0.96305	1.38008	1.04358	0.872815	1.49328	1.48758	1.05668	1.32044	1.14779	1.34181	1.03548	1.05957	1.55037	3.99568	2.98906	1.79451	2.27027	1.27883	1.88601	1.16174
AL355297.3	0.149272	0.239274	0.0969678	0.0258351	0.209313	0.458439	0.105645	0.124321	0.367705	0.061987	0.195273	0.145009	0.230599	0.223544	0.232554	0.092022	0.279115	0.178076	0.231541	0.476996	0.053553	0.146172	0.101015	0.0700571	0.177046	0.113192	0.457379	0.149701	0.0711826	0.157442	0.144606	0.099001	0	0.30181	0.191388	0.0525209	0.174631	0.143411	0.251132	0.0787147	0.190398	0.366501	0.156599	0.308945	1.3695	0.39118	0	0.437461	0.162012
AC012085.2	0.0109982	0.666001	0.384015	0.0856576	0.242345	7.57575	0.311351	6.58363	17.7207	0.274028	0.05755	1.29545	5.27912	0.0588229	2.27886	0.0339003	0.81117	0.0218674	3.57034	0.0549133	0.315658	0.906455	0.416788	0.0258086	0.0507289	0.0416991	4.68628	0.118176	0.611876	0.091144	3.12529	0.109414	0.0207072	0.283017	0.0587553	0.541754	0.0459522	0.037737	2.29968	0.0652456	0.11398	0.24303	0.149995	0	0.100903	0.0240181	0	0	0.0198947
AC124283.3	0.0360866	0.0642719	0.0586051	0.0624567	0.108432	0.118744	0.0425662	0	0.0404059	0.0249757	0	0.0876402	0.159279	0.115804	0.05622	0.055616	0.0374868	0.0358751	0.0799645	0.0360357	0	0.0294476	0.0976816	0.254045	0.0713352	0.0684103	0.0345536	0.103401	0.0286808	0.027187	0.116529	0.239336	0.101915	0.26532	0.192785	0.0952272	0.0301552	0.0990565	0.130096	0.0475734	0.201376	0.265806	0.075716	0.101847	0	0.0788068	0	0.302162	0
AC013468.1	0.179226	0.191526	0.378385	0.186117	0.143609	0.196583	0	0.111951	0.0401356	0.0248086	0.140675	0.0870539	0.11866	0.345088	0.167532	0.110488	0.111708	0.0712702	0.0794296	0.286357	0.0964492	0.0292507	0.169799	0.210288	0.188955	0.407716	0.13729	0.256773	0.0569778	0.0810154	0.202561	0.118867	0	0.263545	0.114897	0.0630602	0.0299535	0.147591	0.172301	0.259903	0.0857269	0.264028	0.0752095	0.404662	0.164432	0.547958	0.27058	0.375176	0.129682
AC018653.3	0.52725	0.922867	0.442894	0.236	0.910498	0.55837	0.171565	0.283914	0.427501	0.339745	0.404327	0.419469	0.341051	0.719576	0.226597	0.266192	0.774346	0.361489	0.261869	0.635439	0.326133	0.267052	0.369102	0.703958	0.527118	0.172331	0.295948	0.2735	0.173398	0.232853	0.454996	0.522519	0.342309	0.818744	1.04898	0.383817	0.288661	0.411727	0.568053	0.263651	0.30437	0.312474	0.87738	2.34325	1.00082	1.9058	2.05861	0.951464	0.361767
AC244093.4	0	0.134428	0.0245151	0.0783787	0.151194	0	0	0	0	0.0208952	0.118484	0.0366607	0.033314	0.0645893	0	0.0697941	0	0.0900414	0	0.0904445	0.0541564	0.0246365	0.0817224	0.0354232	0.119361	0.0572334	0.0289083	0.0648805	0.0239949	0.0682355	0.0731177	0.0333722	0.0284213	0	0.0967724	0.0531126	0	0.0414363	0.0362803	0.0597012	0.0481359	0.0741261	0.158364	0.0284023	0	0.0659313	0	0.252794	0.163837
AP000786.1	0.110682	0.52568	0.239666	0.127708	0.332575	0.40467	0.0435186	0.038409	0.4131	0.204276	0.193055	0.224003	0.0814214	0.0789301	0.057478	0.199011	0.498233	0.0366778	0.0408769	1.10526	0.0661808	0.210746	0.0249668	0.0432883	0.218794	0	0.176634	0.0528573	0.11729	0.166772	0.178704	0.407818	0.20839	0	0.867232	0.162263	0.339129	0.126591	0	0.0486378	0.0882353	0.0905844	0.15482	0.48592	0	0	0.139249	0.463384	0.333691
LINC00539	0.207551	0.164293	0.168533	0.199566	0.207881	0.151768	0.367228	0.252086	0.232394	0.0718235	0.226261	0.0840101	0.152681	0.481032	0.089819	0.142166	0.11978	0.435596	0.178856	0.195744	0.144786	0.159958	0.109242	0.216465	0.212739	0.240448	0.0993673	0.049559	0.201614	0.112931	0.148936	0.101966	0.141113	0.180151	0.234079	0.12171	0.202343	0.166169	0.166276	0.0988062	0.21142	0.0283107	0.157256	0.466446	0.264471	0.226628	0.0435199	0.241372	0.333727
AC004066.1	0.149898	0.16686	0.304296	0.0972883	0.375341	0.411038	0.442034	0.429147	0.58744	0.0778088	0.637301	0.409549	0.0827025	0.080172	0.116765	0.404285	0.311429	0.14902	0.2076	0.44906	0.201666	0.550444	0.177517	0.263816	0.0493859	0.0710415	0.0358826	0.0805334	0.208487	0.282326	0.423537	0.289965	0.141113	0.378846	0.360359	0.19778	0.469725	0.128583	0.0900664	0.296419	0.149373	0.184019	0.353826	0.705093	0.687625	0.245513	0	0.0784459	0.0677882
TRIM31-AS1	1.09325	1.25172	0.824315	1.45288	2.46372	1.11347	0.506608	2.23563	1.26782	1.75649	2.19631	1.46977	0.990923	2.00474	0.486626	1.47428	1.9063	0.815129	0.994968	1.52059	1.36575	1.01956	0.792662	1.00785	1.10628	1.92446	0.0373859	0.503444	1.05508	1.23545	1.70208	3.45271	1.7643	1.22004	2.46132	1.51115	1.30508	1.20573	0.656878	1.10667	1.77419	1.72556	3.93227	2.7916	2.32841	2.98432	4.27359	0.326929	0.211885
POLH-AS1	0.43304	0.520603	0.421957	0.412214	0.368669	0.261237	0.459715	0.405739	0.41214	0.254752	0.538165	0.446965	0.382269	0.277929	0.134928	0.433804	0.607287	0.344401	0.287872	0.345943	0.291296	0.265029	0.322349	0.685922	0.24254	0.492555	0.0207322	0.217142	0.258127	0.391493	0.349586	0.33507	0.244596	0.517373	0.161939	0.285682	0.379955	0.416037	0.546403	0.271168	0.448782	0.212645	0.454296	0.448126	0.397294	1.13482	0.817207	1.54103	1.41
U73166.1	0.114322	0.109079	0.145877	0.0211996	0.196293	0.134351	0.0481606	0.0765108	0.0274298	0.0226066	0.0427295	0.158654	0.0810957	0.0960842	0.0254436	0.0503404	0.127241	0.0487081	0.0723793	0.163087	0.0585921	0.0399815	0.0497339	0.0862302	0.0430457	0.0619211	0.039095	0.175486	0.0259602	0.0492162	0.0922907	0.0631846	0.0384364	0.165105	0.218122	0.0215486	0.0955316	0.0336226	0.0981295	0.0269129	0.0585882	0.100247	0.179901	0.268875	0.749184	0.303158	0.369845	0.205125	0.118171
KLHL7-DT	0.183924	0.089339	0.081462	0.0578772	0.117228	0.284264	0.226809	0.191476	0.168495	0.057861	0.153111	0.142125	0.027675	0.0715419	0.0781467	0.0128845	0.0347382	0.0166223	0.055576	0.091832	0.0449896	0.0136442	0.0226298	0.156945	0.0661047	0.0792429	0.496311	0.0898306	0	0.0503871	0.188973	0.00924112	0.0550913	0.0691497	0.0803921	0.0147075	0.00698602	0.0229483	0.25116	0.0661277	0.0933055	0.307895	0.0263116	0.0943791	0.575256	0.0547713	0	0.332508	0.10586
PEF1-AS1	0.145096	0.23258	0.0628365	0.0418538	0.290653	0.116708	0.0342297	0.0302107	0.0758158	0.0133895	0.0632699	0.05873	0.117411	0.0620826	0.0452094	0.00745395	0.0904353	0.0961634	0.0857381	0.0579563	0	0.0157869	0.0392754	0.113495	0.0637381	0.0366749	0.074097	0.0623625	0.0307516	0.0510124	0.242076	0.0855388	0.0455305	0.0888989	0.299721	0.0340343	0.0565818	0.0531043	0.0813687	0.0191281	0.138803	0.118749	0.243549	0.227501	0	0.126745	0.109526	0.44547	0.139981
AC008649.2	0	0.315517	0.0719245	0	0	0	0	0	0	0.0613039	0	0	0	0.0947487	0	0.068256	0.0920131	0	0	0	0	0	0.119882	0.415711	0	0	0	0.0634506	0	0.133463	0	0	0	0.16281	0.0946397	0.155826	0.0740172	0.0607847	0	0	0.141225	0.217477	0	0.333317	0	0.193435	0.334312	0	0
AC058791.1	0.140758	0.0358138	0.0653123	0.00580038	0.25511	0.249964	0.0316252	0.27912	0.120081	0.0695851	0.797921	0.0325568	0.147923	0.0573588	0	0.0413207	0.619693	0.0599713	0.178232	0.676024	0.0420822	0.142211	0.0272152	0.133696	0.0220831	0.0381198	0.0128361	0.0384116	0.0426176	0	0.286785	0.0518636	0.0504794	0.209443	0.594413	0.112021	0.140026	0.0505969	0.910184	0.0441817	0.272514	0.246855	0.11954	0.170254	0.307475	1.21493	0.0758944	0.252557	0.121247
PVT1	0.585349	0.66027	0.345389	0.297172	0.273597	0.295336	0.584582	0.434694	0.410724	0.183655	0.454336	0.345918	0.340175	0.53013	0.273578	0.249588	0.563469	0.515966	0.428035	0.674149	0.311501	0.286596	0.219183	0.581488	0.426842	0.480853	0.295187	0.232017	0.266726	0.235195	0.381184	0.250185	0.308583	0.537957	0.316878	0.52518	0.436962	0.299929	0.379843	0.396124	0.255095	3.55463	2.72652	2.60285	1.808	2.70999	1.98834	3.66778	2.14592
AP006545.1	0.188237	0.167629	0.0573185	0.101809	0.117835	0.0516166	0	0.097983	0.105384	0.0488547	0.215465	0.171432	0.077891	0	0.109972	0.0725266	0.0733277	0.0233917	0.0521393	0.0939855	0.0844151	0.115205	0.11146	0.0828227	0.0930255	0.133817	0.11265	0.0505654	0.0187007	0.124087	0.0759803	0.0520181	0.110753	0.108123	0.326824	0.103485	0.0983105	0.129176	0.226204	0.108567	0.0375153	0.231085	0.123423	0.376308	0.215873	0.205538	0	0.935839	0.0851259
AL391095.4	0	0	0.0483492	0.0515267	0.0894564	0.0979639	0	0.402921	0.0666698	0.0824197	0.0389462	0.108455	0.0657025	0.254769	0.0463815	0.0458832	0.18556	0.0591939	0.131941	0.0891884	0.0534043	0.0485886	0.0201468	0.0698625	0.0784687	0.169316	0.0285068	0.0426529	0	0.089717	0.168238	0.0658173	0	0.0547222	0.127238	0.052375	0	0.0204304	0.0357764	0.058872	0.0949346	0.146193	0.156164	0.476134	0.54628	0.390094	0.56183	1.4957	0.107708
SAP30L-AS1	0.250008	0.290397	0.220661	0.112878	0.195969	0.226529	0.115395	0.0678975	0.158222	0.188078	0.142197	0.158392	0.239888	0.116274	0.118541	0.159148	0.33875	0.0972557	0.156563	0.325637	0.12674	0.0975714	0.147117	0.178553	0.128924	0.247276	0.176939	0.194663	0.112309	0.19654	0.228153	0.156199	0.173958	0.349645	0.220666	0.0573681	0.281581	0.268538	0.248185	0.222114	0.190639	0.0800652	0.182455	0.449944	0.199453	0.356069	0.246157	0.318557	0.21629
AC039056.2	0.0838961	0.298846	0.238435	0.108902	0.210074	0.0920209	0.19792	0.0436705	0.187876	0.11613	0.0548752	0.203751	0.277725	0.134614	0	0.0969742	0.174303	0.0834043	0.0929529	0.125667	0.0376233	0	0.0851608	0.5414	0.0552813	0.39761	0.0803322	0.030049	0.0666786	0.0948086	0.609552	0.602789	0	0.308415	0.358557	0.110695	0.140213	0.057573	0.050409	0.138251	0.200645	0	0.572093	0.236779	0.577282	0.916071	0	0.614672	0.682923
AC097641.2	0.277183	0.781652	0.450148	0.399776	0.508976	0.557381	0.217968	0.384752	0.310359	0.447624	0.181301	0.61707	0.305856	0.741245	0.143943	0.391589	0.719844	0.137779	0.255921	0.691979	0.29004	0.301584	0.187574	0.325222	0.273964	0.175154	0.0884693	0.132371	0.220298	0.278432	0.223765	0.408521	0.304427	1.06142	1.5795	0.121907	0.308831	0.348726	0.388606	0.243609	0.478765	0.113426	0.387718	0.999591	0.635757	0.403545	0.174361	0.386819	0.417833
AC087222.1	0.0425307	0.265122	0.241746	0.0736096	0.0851966	0.093299	0	0.0442771	0.0476213	0	0.0556374	0.10329	0	0.181978	0.198778	0.0655474	0.265085	0.169125	0	0.254824	0.0762918	0.208237	0.115125	0.0998035	0.112098	0	0.0814479	0.0913991	0.0338023	0.0320418	0.206006	0.329087	0.040038	0.390873	0.454421	0.112232	0.14216	0.116745	0.0511091	0.0560686	0.169526	0.104424	0.26771	0.520146	0	0.371518	0.160523	1.15739	0.0769343
AL122035.2	0.240719	0.469563	0.344391	0.198392	0.459241	0.565781	0.229858	0.298337	0.320871	0.142802	0.239925	0.542853	0.581836	0.355586	0.589318	0.167829	0.643009	0.307682	0.838216	0.240379	0.226183	0.261911	0.333554	0.24209	0.2417	0.260764	0.921973	0.336661	0.227759	0.310891	0.379404	0.266085	0.140283	0.263369	0.306187	0.241989	0.22031	0.228121	0.454571	0.151115	0.347247	0.422162	0.589248	0.399	0.630997	1.07641	0.519167	0.383923	0.414704
AL592301.1	0.0744287	0.110467	0.040291	0.128817	0.173943	0.108849	0.0292643	0.0516566	0.0277791	0.0515123	0.0324551	0.180758	0.164256	0.0530768	0.115954	0.038236	0.103089	0.0246641	0	0.0990982	0	0.0202452	0.033578	0.0291094	0.0326953	0.0470321	0.0237556	0.0355441	0	0.0934552	0	0.0548478	0.0233555	0.136805	0.106031	0.0654687	0.0414634	0.0681014	0	0.04906	0.0395561	0.0609138	0.0780821	0.163379	0.113808	0.162539	0	0.519341	0.0448783
SLFNL1-AS1	0.116109	0.17498	0.0797762	0.0270515	0.165494	0.288994	0.0579433	0.05114	0.125006	0.0370889	0.0408935	0.200641	0.187252	0.0620999	0.090444	0.072266	0.227311	0.0976699	0.133591	0.115945	0.0360479	0.0655946	0.0513744	0.256745	0.0559089	0.152384	0.200973	0.115163	0.0248447	0.0740166	0.144204	0.0888534	0.0546518	0.14775	0.176542	0.0353531	0.074634	0.0704849	0.134161	0.0706464	0.074761	0.0548224	0.229561	0.512544	0.163884	0.302323	0.303388	0.289792	0.0727029
AC009690.2	0.190659	0.212232	0.19352	0.106065	0.197782	0.119499	0.120478	0.0992436	0.106739	0.0706904	0.124707	0.165369	0.0901635	0.203944	0.148515	0.146919	0.134395	0.135386	0.10562	0.292384	0.140466	0.116687	0.184317	0.159787	0.12563	0.154901	0.0586797	0.17072	0.0920008	0.138509	0.115437	0.127955	0.173074	0.250318	0.523825	0.137759	0.170701	0.172893	0.196384	0.121185	0.184562	0.0668736	0.171443	0.339511	0.312358	0.223052	0.359799	0.285076	0.270981
AL049840.2	1.17559	1.86265	1.14055	0.528479	1.34567	1.82531	0.378184	0.667562	0.547034	0.517765	0.579199	1.00112	0.960268	0.685916	0.784918	0.541186	2.66445	0.500871	0.592045	1.14344	0.520349	0.299007	0.464927	1.21811	0.643846	1.04194	1.85659	0.568705	0.412562	0.506096	1.98435	1.28259	0.474296	1.31895	1.54969	0.429743	0.727203	0.817216	1.1742	0.493116	0.523357	0.337369	1.10516	1.8241	1.26065	2.63397	1.21009	2.10932	0.828523
AC048341.1	0.20713	0.357928	0.22025	0.125898	0.207459	0.43815	0.0756232	0.141189	0.132527	0.119463	0.154835	0.20361	0.171418	0.142434	0.157504	0.0817061	0.215167	0.17895	0.251346	0.29302	0.145966	0.100609	0.108463	0.283532	0.116985	0.238401	0.259719	0.14131	0.127386	0.11332	0.169203	0.24531	0.136957	0.364857	0.339867	0.117125	0.187508	0.152294	0.151123	0.136531	0.149397	0.0968679	0.162973	0.76784	0.226229	0.172318	0.279202	0.397454	0.0892094
AL049840.6	7.40065	8.0733	7.23271	4.57451	7.14769	6.69682	3.30473	3.41201	2.45634	5.65251	5.53218	5.74502	6.24133	5.65455	3.33535	4.50119	8.97826	6.46389	6.03254	6.46643	5.35755	5.2411	5.04391	7.34977	5.32929	7.91671	5.03631	3.76776	5.77682	5.45603	5.37699	7.94677	5.051	6.31566	9.48871	4.71956	7.73028	7.29146	4.54197	4.94787	6.48973	5.12668	4.88018	7.08657	16.1257	15.065	9.47698	13.7213	5.88078
POC1B-AS1	0.221259	0.170923	0.305212	0.101503	0.154861	0.195904	0.160366	0.144312	0.161182	0.145754	0.191801	0.168327	0.185317	0.122616	0.166122	0.193096	0.265844	0.127207	0.159492	0.258215	0.227139	0.160975	0.212868	0.159517	0.163359	0.283	0.112311	0.210055	0.0911036	0.158659	0.260396	0.129654	0.133005	0.269494	0.338942	0.121932	0.180436	0.186595	0.230649	0.196801	0.170011	0.248716	0.167797	0.461445	0.941604	0.943094	0.211289	0.318076	0.188064
ST7-OT4	0.0160927	0.00716545	0.0130674	0	0.0161183	0.0529535	0.0284734	0.00837674	0.00900943	0	0.031578	0	0.0266362	0	0.0250711	0	0.0167171	0.00799918	0	0.00803499	0.0144336	0.00656603	0.0163353	0.00944087	0	0	0.0154091	0.0057639	0	0	0.0194871	0.0266827	0.00757475	0	0	0.0070777	0.00672379	0.0110435	0.0193386	0.00530379	0.0064145	0.0197558	0	0.0681272	0	0	0	0.0168435	0
AC020915.2	0.116921	0.277655	0.379761	0.10118	0.390355	0.299235	0.0459715	0.243443	0.130915	0.161842	0.0509841	0.33128	0.172021	0.125068	0.0607176	0.210228	0.76923	0.15498	0.172723	0.27243	0.349555	0.159017	0.158244	0.182913	0.179765	0.738832	0.373179	0.0837548	0.0929257	0.176172	0.377553	0.301563	0.0733787	0.501454	0.374773	0.137127	0.195406	0.294198	0.374676	0.256896	0.124278	0.0956901	0.490639	0.696632	0.357565	2.04267	0.882583	2.20276	0.281999
AL049838.1	0.305909	0.797798	0.425828	0.132362	0.459593	0.886768	0.154644	0.5232	0.513785	0.362949	0.114337	0.610265	1.302	0.0934931	0.851037	0.202054	0.431271	0.34756	2.2999	0.327297	0.568339	0.51709	0.591467	0.512752	0.374346	0.331382	1.29719	0.469573	0.364693	0.296313	0.599749	0.434757	0.16456	0.502038	0.25681	0.269082	0.127814	0.284901	0.420126	0.345671	0.278707	0.643786	0.320925	0.226119	0.601409	0.238589	0.0824704	0.960542	0.0790517
LINC00412	0	0.0908989	0.0828844	0.0441658	0	0	0	0.0531325	0.0571455	0.0353227	0	0.123948	0	0.0545933	0	0.0786569	0	0	0.0565463	0.152894	0	0.0832947	0.0345374	0	0.100888	0.0967518	0	0.0731192	0	0.11535	0.0412012	0	0.0960911	0.187619	0	0.134679	0.085296	0.0700471	0.122662	0.0336412	0.0813725	0	0	0.0960269	0.23412	0	0	0.534179	0
ZNF337-AS1	0.177687	0.140253	0.134445	0.0663984	0.169879	0.221471	0.190537	0.176574	0.171824	0.0698736	0.163768	0.152016	0.147051	0.146871	0.163576	0.0871331	0.192971	0.0883225	0.120805	0.209697	0.0941718	0.115338	0.117511	0.108979	0.0984555	0.0918668	0.286142	0.130177	0.102706	0.127781	0.195605	0.133916	0.117851	0.170723	0.245942	0.106565	0.114735	0.149648	0.150439	0.0984898	0.196379	0.168557	0.241484	0.182357	0.389024	0.17638	0.137176	0.329685	0.0657449
TSPOAP1-AS1	0.476211	0.397572	0.236845	0.226655	0.357726	0.5158	0.351074	0.439992	0.379912	0.26367	0.350418	0.397557	0.2496	0.458456	0.333854	0.197243	0.451403	0.3669	0.389119	0.647922	0.192202	0.223445	0.261836	0.467949	0.482449	0.259545	0.518679	0.174828	0.212895	0.219746	0.249885	0.223717	0.207339	0.229769	0.451569	0.335107	0.283531	0.318626	0.300438	0.133406	0.322688	0.365381	0.94297	2.95121	0.518822	0.80597	1.90969	1.6822	0.301499
DIAPH2-AS1	0.0278503	0.0165342	0.0150764	0.0562353	0.0278946	0.0101825	0.032851	0	0.0207892	0.0064251	0.0242886	0.0225458	0.0204876	0.0297911	0.0144628	0.0357686	0.0578619	0.018458	0	0.0185407	0.0499581	0	0.0439758	0.108924	0.0122342	0.0175988	0	0.0199502	0.0147565	0.0139879	0.0299775	0.0102617	0.026218	0.0255955	0.00991893	0.00816587	0.0232726	0.0127414	0.0111559	0.0244769	0.0222021	0.0227932	0.0389565	0.0960685	0.0425857	0.0405468	0.105115	0.0582993	0.151136
ITGB1-DT	0.0179677	0.0800032	0.0583595	0.0155487	0.071985	0.0985388	0.275521	0.112233	0.12071	0.074613	0.0940192	0.0654546	0.0396528	0.153758	0.111969	0.110766	0.0186649	0.0893118	0.059722	0.053827	0.112807	0.117297	0.0729542	0.105409	0.0236787	0.0340618	0.0516132	0.0386128	0.0428408	0.0676826	0.159555	0.0794442	0.0845731	0.033026	0.0959883	0.0790234	0.0450432	0.110972	0.151143	0.071061	0.0859425	0.264692	0.169647	0.118323	0.329691	0.117715	0	0	0.065004
AC020594.1	0.317093	0.112951	0.41197	0	0.127039	0.347801	0.0748057	0.0660226	0.142018	0.0877843	0.248887	0.385046	0	0.0678378	0	0.0977393	0.263517	0	0	0.126658	0.0568803	0.155253	0.0858326	0.148819	0.20894	0.360672	0.121449	0.0454291	0.15121	0.0477783	0.204787	0.140203	0.179105	0	0.338799	0.055784	0.0529946	0.174082	0.0762101	0.0418026	0.101114	0	0.266126	0.298308	0.290918	0	0.718078	0.132754	0
AL355312.3	0.33659	0.094655	0.115079	0.0613211	0.0177434	0.0777235	0	0.055328	0.0396713	0.0490432	0.162222	0.0430234	0	0.113698	0.110396	0.0409536	0.0552079	0.387451	0.0196276	0.0530708	0.0794443	0.159017	0.0719292	0.145499	0.0350191	0	0.0339254	0.0634506	0.0281593	0.080078	0.0286025	0.039164	0.316862	0.146529	0.208207	0	0.310872	0.0243139	0.212884	0.0817397	0.141225	1.9573	0.0929241	0.149993	0.975177	0.967174	1.73842	0.111251	0.640907
AC026333.4	0.630455	0.315807	0.223971	0.204592	0.315729	0.0864388	0.0929571	0.123064	0.0441197	0.0545425	0.257732	0.0956953	0.391316	0.295045	0.245549	0.0910916	0.409323	0.117517	0.174628	0.35413	0.035341	0.128617	0.239984	0.277395	0.155783	0.37349	0.0754591	0.141131	0.125268	0.237486	0.222668	0.217778	0.222564	0.181066	0.54731	0.13864	0.526829	0.324483	0.142053	0.233757	0.439771	0.0967455	0.124013	0.518969	1.26528	1.2047	0.446159	0.412418	0.356387
AC087588.2	0.150954	0.896186	0.53116	0.391894	0.655174	0.275955	0.296764	0.419073	0.225363	0.487553	0.460772	0.366607	0.444186	0.538244	0.313565	0.387745	0.470433	0.250115	0.724749	0.301482	0.451304	0.205304	0.136204	2.36155	0.331558	0.858502	0.0481804	0.108134	0.199957	0.379086	0.771798	1.00117	0.0473689	0.647418	1.18277	0.575387	0.420473	0.414363	0.120934	0.331674	0.601698	0.247087	0.580667	2.08284	0.92329	2.96691	0	0.210662	2.00246
AC010524.1	0	0	0.0352343	0	0.0434606	0.0475938	0	0	0.0971705	0.0300315	0	0.0526906	0.0478804	0.0928307	0	0	0.180301	0	0.0961517	0	0	0	0.0293638	0.0509119	0.0571837	0.0822586	0.124645	0	0.0344866	0.130762	0.0350294	0	0	0.079757	0.0927239	0	0.0362594	0.0297771	0.104288	0.0572036	0	0	0.0910431	0.244927	0	0	0	0.272496	0.0784916
AC145207.5	1.29476	1.94304	1.09029	1.36252	1.65705	1.10456	0.631637	0.682283	0.465346	1.2114	0.585499	1.05786	0.890732	1.28239	0.547862	1.30567	1.48614	1.28717	1.31941	1.07744	0.939055	1.43483	1.11416	2.73823	1.40085	1.62119	0.313766	0.853058	0.800366	1.51736	1.44527	1.07781	0.948013	1.48374	1.03327	1.08968	1.53609	1.11339	0.874	1.4909	1.87321	1.9427	0.679157	1.30829	3.15302	2.87989	2.02108	3.81454	0.751787
AC073073.2	0.282702	0.355415	0.364588	0.244642	0.266495	0.34656	0.284424	0.276998	0.15827	0.25896	0.293683	0.424059	0.339471	0.302402	0.362704	0.288327	0.215935	0.338907	0.405344	0.398545	0.357962	0.244262	0.388245	0.673151	0.295856	0.2522	0.207	0.25016	0.198251	0.275624	0.382606	0.248155	0.328752	0.443212	0.373126	0.358376	0.451626	0.285297	0.409666	0.290478	0.52365	0.244978	0.462314	0.81351	0.53399	0.544739	0.0941468	0.435134	0.511383
AC005540.1	0.279897	0.0415425	0.0568195	0.0201846	0.140171	0.127918	0.19259	0.145695	0.0783497	0.0645726	0	0.0283233	0.128688	0.0748504	0.145352	0.0179738	0.0726894	0.0927521	0.0516854	0.0931674	0.0836802	0.0951681	0.11049	0.164203	0.107585	0.0442174	0.0446678	0.183793	0	0.0175724	0.0188297	0.360957	0.153704	0.192927	0.149529	0.0820674	0.155927	0.144058	0.140147	0.0614985	0.111566	0.171805	0.293636	0.197487	0	0.35656	0	0.0488259	0.126577
AC109347.2	0.429938	0.218782	0.398985	0.318905	0.123035	0.134736	0.289792	0.191825	0.61894	0.0850175	0.32139	0.298328	0.20332	0.197099	0	0.615282	0.44662	0.305298	0.2722	0.429331	0.275437	0.10024	0.207818	0.432387	0.283297	0.23287	0.117621	0.0439973	0.195259	0.231362	0.198333	0.203675	0.17346	0.056447	0.32812	0.324155	0.410594	0.168595	0.221424	0.404851	0.489634	0	0.193303	0.635594	0.281749	0	0	0.12857	0.333308
AL592546.2	1.14612	0.606868	1.08157	1.95683	0.558456	0.373735	2.33844	0.48372	0.93646	1.28632	1.2967	0.2633	0.922873	1.65673	0.482582	1.07414	0.547026	1.17019	0.858001	0.52585	1.08352	1.06165	0.985215	0.763237	0.959314	1.46805	0.118641	0.998521	2.60962	1.79693	0.425111	1.47233	1.19558	0.711705	0.9598	1.52584	0.957731	1.08411	0.297792	1.77637	0.592655	0.0760543	0.0324966	0.437117	0.568384	0.405878	1.63678	0.583583	0.840496
AC104825.1	1.14138	1.31019	1.18931	0.94775	1.07711	1.55584	0.233466	0.71432	0.465396	0.589039	0.604151	1.57825	1.87098	0.776304	1.1923	0.625333	0.973204	1.06254	1.86399	0.560001	1.00595	0.947545	0.857217	0.495424	0.895543	1.21319	2.55218	1.3233	1.04347	0.750541	0.841525	0.984525	0.583822	0.951954	0.993935	0.568725	1.18532	0.846645	0.515339	0.608834	0.736335	0.307775	0.775197	0.639293	0.423707	0.216118	0.224109	0.731968	0.322229
AC018552.3	0	0	0	0	0.0386143	0	0	0	0	0.0266826	0	0	0	0	0	0.0594171	0.120147	0	0	0	0	0	0	0.0904694	0	0.0730859	0	0.027617	0	0.0580902	0	0	0.0362934	0.0354316	0	0.0339119	0	0.0264566	0	0	0	0	0	0.0362692	0	0	0	0.322813	0.069739
AC116552.1	0.0292435	0.156252	0.0949835	0.101226	0.0585799	0.0962265	0	0	0.0327437	0.0202395	0.0382554	0.142042	0.0968059	0	0.0455589	0.0450694	0.0911344	0.029072	0	0.175213	0.104914	0	0.0197895	0.20587	0	0.0554376	0	0.0628447	0	0.0440629	0.0944312	0.161625	0.0825885	0.0537517	0.124981	0	0.195494	0.0200681	0.0351419	0.038552	0.0466255	0	0	0.357645	0	0.25545	0	0.489725	0.105798
AC011676.1	0.161981	0.19233	0	0	0.270397	0.23689	0	0.0562107	0	0.0747383	0.0706328	0	0.178737	0.173268	0.0841176	0.0832138	0.0560886	0	0	0.377422	0	0.0881204	0.146153	0.126703	0	0.204714	0	0.0386777	0.214564	0.0406777	0.130765	0.0596832	0	0.0992443	0.0576897	0.0949873	0.0451188	0.111158	0	0.0711803	0.0430434	0.662841	0.396508	0.355566	0.495367	0	0.611361	0.339076	0.0976697
LINC01126	0.195341	0.255135	0.179767	0.0450781	0.156522	0.214259	0.107527	0.081345	0.0729074	0.0540786	0.153324	0.0948814	0.143699	0.153233	0.162307	0.0401408	0.148809	0.168303	0.0432858	0.299101	0.0700809	0.0850153	0.061689	0.137518	0.111553	0.0740627	0.224452	0.0839583	0.0414007	0.0196222	0.126157	0.129555	0.0858165	0.0837788	0.278284	0.0572752	0.130587	0.116178	0.125196	0.0686721	0.145343	0.0959226	0.081972	0.0980105	0.358434	0.0853182	0.0491516	0.136303	0.117785
AC138956.1	0.510368	0.454494	0.621633	0.184024	0.425983	0.419845	0.0501673	0.177108	0.0476213	0.323792	0.278187	0.258225	0.187722	0.272967	0.265037	0.294963	0.883618	0.126844	0.23561	0.509648	0.343313	0.104118	0.172687	0.299411	0.224196	0.241879	0.325792	0.0913991	0.0676047	0.192251	0.446347	0.423111	0.240228	0.664484	0.863399	0.112232	0.31986	0.350236	0.5622	0.0841029	0.237337	0	0.223092	0.880247	0.5853	0.278638	0.481568	0.445149	0.461606
AC007639.1	0.128664	0.0687471	0.0626857	0.0445369	0.128869	0.0282249	0	0	0	0.0712392	0.0336629	0.0624949	0.0851845	0.027526	0.0801793	0.0198295	0.106925	0.025582	0.0285108	0.0770896	0.0692396	0.062996	0.0348277	0.0603853	0.033912	0.0975648	0	0.0737337	0.0204518	0.11632	0.0623212	0.199111	0.0484493	0.0945978	0.274944	0.0452701	0.0430064	0.0529768	0	0.0508858	0.0410282	0	0.026996	0.387336	0.236087	0.168588	0.291369	0.538668	0.0930969
OR2A1-AS1	0.395675	1.11443	0.79949	1.09092	0.497684	0.257368	0.510137	0.397553	0.437883	1.74817	1.20976	0.72629	0.593988	0.807123	0.243705	0.79062	0.965437	0.48026	0.514852	0.840771	0.511691	0.570673	0.927818	1.20921	0.497187	0.697759	0.220271	1.43366	1.28714	0.183709	0.961981	0.666226	1.68051	1.222	0.973332	0.615144	1.20337	0.344147	0.818273	0.60957	1.48179	0.203334	0.835021	0.549697	0.253266	0.351662	0.121555	0.385242	0.307935
AC002550.2	0.489642	1.25967	0.5743	0.564963	1.14431	0.596735	0.513387	0.283193	0.121833	0.414191	0.355853	0.52851	0.600328	0.581959	0.0847581	0.33539	0.904251	0.432686	0.361667	0.651935	0.487958	0.31077	0.331349	0.766005	0.681124	0.928228	0.573029	0.194861	0.302677	0.49185	0.834482	0.902065	0.512161	0.75	0.232516	0.669974	0.591011	0.522687	0.261513	0.466195	0.433711	0.267155	0.342451	0.870092	0.748708	1.06929	0	1.36663	0.59048
AC232271.1	0.497397	0.752301	0.60904	0.218633	0.466557	0.42433	0.149005	0.205485	0.318247	0.207643	0.278863	0.421835	0.453021	0.312479	0.369002	0.237274	0.902169	0.337503	0.428627	0.717449	0.240762	0.180395	0.235084	0.296433	0.291331	0.88306	0.461148	0.186636	0.144323	0.321197	0.452531	0.471267	0.282434	0.696574	1.09664	0.270845	0.442031	0.265482	0.379507	0.270616	0.339876	0.271386	0.596357	0.8913	1.37626	1.08623	1.01316	0.495812	0.128535
AC100821.2	0.048717	0	0.0791169	0.0421582	0.0975888	0.10687	0	0	0.109096	0	0.0637301	0.0591571	0	0.0521118	0	0.0750815	0.202429	0.0484314	0.107952	0	0	0	0.13187	0.171481	0	0	0.0466474	0.0348978	0	0.0734048	0.157314	0	0	0.134318	0.208207	0.0428523	0.162838	0	0	0	0	0.239225	0	0.229155	0	0.212778	0	0.10198	0.0881247
LINC01138	0.609642	0.455649	0.406634	0.56054	0.370728	0.519423	0.243983	0.623342	0.548527	0.237339	0.469965	0.436242	0.276291	0.675415	0.508807	0.29781	0.418428	0.508665	0.50056	0.407666	0.366154	0.333137	0.419922	0.217145	0.337148	0.309566	0.59938	0.191061	0.601335	0.266554	0.294414	0.342959	0.425309	0.370188	0.558321	0.23461	0.391175	0.377273	0.405551	0.254743	0.308091	0.601404	0.485386	0.860292	1.04872	1.35512	0.595785	0.888761	0.738475
AC084117.1	0.396953	0.565593	0.128931	0.0687023	0.23855	0.174158	0	0.0826505	0.177786	0.219786	0.207713	0.289212	0.175207	0.169846	0.247368	0.183533	0.329884	0.236776	0.263883	0.237836	0.213617	0	0.10745	0.7452	0.0523125	0.602011	0.152036	0.853058	0.189293	0	0.640908	0.175513	0.0747375	0.218889	0.254476	0.558666	0.0663414	0.0544811	0.0954037	0.104661	0.189869	0	0.166575	0.672189	0.364187	0.520125	0	0	0.287221
AL354993.2	0.276842	0.176096	0.481708	0.171122	0.277282	0.0867577	0.0466501	0.288209	0.0442825	0.0547437	0.206946	0.240121	0.04364	0.169219	0.308069	0.274283	0.287583	0.196585	0.219091	0.39493	0.106414	0.129091	0.0535266	0.0928062	0.156358	0.0749737	0	0.0283303	0.0628648	0.119181	0.159636	0.174865	0.148923	0.218081	0.464817	0.139151	0.19829	0.2714	0.475258	0.20855	0.0315281	1.35943	0	0.669708	0.544264	0.259103	0	0	0
AC084357.2	0.233841	0.347069	0.0632935	0	0	0.170992	0.459715	0.243443	0.0872768	0	0.203936	0.378605	0.172021	0.0833789	0.242871	0.0600652	0.0809716	0.0774902	0	0.389186	0.209733	0	0	0.457282	0.256807	0.295533	0.149272	0.16751	0.123901	0.293619	0.251702	0.258483	0.0733787	0.214909	0.333132	0.0685636	0.260541	0.213962	0.281007	0.308275	0.248556	0	0.0817732	0.513308	0	0.170223	0	0.326335	0.845997
AC068790.6	0.166166	0.29595	0	0	0.166431	0	0	0	0.0930276	0	0.108687	0	0.0916779	0	0	0.064023	0.863069	0	0	0.248898	0.0745176	0.135596	0	0.194965	0	0.157503	0	0.119031	0	0.0625933	0.0670718	0.183676	0	0.152713	0	0	0.069427	0.285075	0.0998411	0	0	0	0.174323	0.390807	0.381126	0.181439	0	0.173919	0
HAND2-AS1	0.126489	1.6566	0.734904	0.171738	0.753585	8.24775	0.465608	3.65305	5.44048	0.392435	0.111263	3.29436	8.10008	0.118973	5.97972	0.109234	2.49653	0.30136	6.56982	0.222132	0.776532	1.43793	0.764469	0.284027	0.195433	0.545724	7.72632	1.35913	1.11276	0.331886	4.14435	0.431506	0.0882799	0.519106	0.246993	1.39652	0.0564938	0.225984	1.07711	0.138001	0.495487	0.315916	0.478168	0.0533429	0.0600246	0.0333379	0	0.0776079	0.0276146
AL021707.4	0.31369	0.372464	0.466983	0.180972	0.261824	0.172034	0.0616691	0.0544284	0.117079	0.108553	0.20518	0.317428	0	0.335549	0.162901	0.120863	0.217241	0.2079	0.289628	0.261039	0.187566	0.298642	0.212279	0.122685	0.0688993	0.495558	0.100121	0.224708	0.0831043	0.118164	0.211031	0.346745	0.19687	0.336341	0.837907	0.0459878	0.0873764	0.394656	0.314134	0.172308	0.166714	0	0.164544	0.491845	0.23983	0.114174	0.789302	0.437766	0.0945728
AC116025.2	0	0.0430898	0	0.0418728	0	0.053073	0	0.0503739	0.0541786	0.0334888	0	0.0587565	0.0533926	0	0	0	0.0502645	0.0481034	0	0.0483187	0.0433985	0	0	0	0.0318835	0	0	0.0346615	0	0	0.0390621	0	0	0	0	0.042562	0	0.0332052	0	0	0	0.47521	0.406097	0.0910413	0.665894	0.317006	0	1.41805	0.175056
AL080317.1	0.185722	0.22052	0.150808	0.120539	0.0930088	0.0339514	0	0.0805619	0.0693173	0.128539	0.141725	0.169142	0.0512337	0.231775	0.0482234	0.190821	0.160774	0.246178	0.188624	0.15455	0.0277625	0.126295	0.094261	0.290547	0.142773	0.381418	0.0444582	0.243907	0.0738038	0.1749	0.162425	0.171078	0.145698	0.170686	0.214972	0.0816823	0.245726	0.223038	0.0557957	0.193831	0.197409	0.151999	0.162366	0.495041	0.354983	0.371786	0.233656	0.971936	0.167978
AL035071.2	0.0467004	0.207939	0.265447	0.0404131	0	0.153669	0	0.0972359	0	0.0969644	0.061092	0.113417	0.154594	0.249773	0	0	0	0	0.0517417	0.0466344	0	0.114326	0.0632058	0.219176	0.030772	0	0.0447165	0.0669065	0.0742326	0.105549	0.188502	0.103243	0.0439633	0.171677	0.199589	0	0.0780487	0.0320477	0.11224	0	0.0372293	0	0.195971	0.263603	0.428455	0.713897	0	0.977582	0.168954
TERC	0.0792439	0.0352842	0	0.0342877	0.0396849	0	0.0467363	0	0	0	0	0	0	0.042383	0	0	0.0411593	0.0393896	0.0877984	0	0.0710741	0	0.0268128	0	0	0	0	0.0283827	0	0	0	0.0437971	0.0745994	0	0	0.0697042	0	0	0.0476137	0	0	0.291846	0	0.0745496	0	0	0	0	0.0716726
CCDC18-AS1	1.38842	1.45978	1.35653	0.321692	2.19809	1.81272	0.54943	0.704066	0.757244	0.502165	0.761672	1.08228	0.859926	1.17377	1.0885	0.748933	1.33063	0.618901	0.987493	1.71743	0.783322	0.467815	0.572833	0.756722	0.808624	1.01886	0.72476	0.779623	0.441394	0.735582	1.04492	0.905985	1.01612	1.2472	1.67967	0.456995	1.20887	1.12798	1.64694	0.646535	0.606978	0.3189	0.700096	2.7851	0.760181	0.625976	0.929731	2.59701	0.550917
AC090116.1	0	0.0855998	0	0.0415911	0.048138	0.105432	0.0566913	0.150105	0	0.0665271	0.188618	0	0.0530334	0	0	0.0740715	0	0.0477798	0.1065	0.0479937	0.0862132	0	0	0	0.031669	0	0	0	0	0.0362087	0.0387994	0.159378	0.226223	0	0.102703	0	0.0401618	0.0329818	0.0577556	0.03168	0.0766288	0.590017	1.7143	1.03993	0.881887	5.03798	0	1.00608	7.38983
AL133371.2	0.729097	0.649278	0.94725	0.567846	0.511179	1.19956	1.46202	0.531325	0.408182	0.45415	0.476892	0.619741	0.884973	0.935885	0.45435	0.842752	0.681648	0.797306	0.646244	0.436841	0.784716	0.713955	1.03612	0.855459	1.96972	1.6586	0.628312	0.313368	0.347681	1.59293	0.765166	1.28948	1.30409	0.469047	1.40221	0.705459	1.76685	1.20081	0.788541	1.58594	0.464986	0	0.382443	1.02886	0	0.159222	0	0.61049	0.527549
AC018648.1	0.096267	0	0.0521129	0	0.03214	0.0703933	0	0.167033	0.215579	0.0222089	0.0839558	0.116897	0.141634	0	0.0999841	0.0989098	0.16667	0.0957027	0.177765	0.0961312	0.0863422	0.130927	0.0434303	0.263553	0.0211443	0.121664	0.215081	0.13792	0.0765107	0.0725257	0.10362	0.106411	0.0302083	0.235928	0.171428	0.028226	0.0804439	0.0660624	0.0771228	0.12691	0.0511624	0	0.168321	0.301881	0	0.910997	0	0	0.0580462
AC068790.3	0.193811	0.24163	0.18885	0.201262	0.155295	0.127548	0.0457221	0.161415	0	0.10731	0.101415	0.141207	0.128316	0.0829265	0.0603882	0.149348	0.201331	0.15414	0.0858932	0.193537	0.173829	0.0632618	0.104924	0.2274	0.178789	0.146965	0.074231	0.222134	0.0616144	0.204419	0.219044	0.471314	0.145961	0.178119	0.124247	0.0681916	0.129564	0.159601	0.0465805	0.0766508	0.185406	0.285513	0.243989	0.401125	0.355625	0.761846	0	0.567988	0.0701173
LINC00954	0.114432	0.154895	0.107787	0.0198053	0.137537	0.120494	0.032395	0.0714787	0.0563767	0.0475194	0.0299394	0.100048	0.075762	0.161577	0.106966	0.0564354	0.171176	0.0864587	0.0456428	0.246825	0.0369485	0.0298815	0.0495604	0.134265	0.0573058	0.0520637	0.127103	0.02951	0.0291034	0.0724173	0.0812939	0.126491	0.0603263	0.138821	0.122266	0.0724727	0.0879735	0.0942338	0.148514	0.0663772	0.0693308	0.078669	0.148861	0.327267	0.54593	0.589764	0.25914	0.891097	0.0165598
ZNF460-AS1	0.755179	0.569042	0.542455	0.175945	0.494556	0.477873	0.137042	0.483808	0.585393	0.221126	0.227978	0.211619	0.2564	0.590318	0.678754	0.313348	0.362068	0.519751	0.611436	0.580087	0.286559	0.260719	0.157244	0.272634	0.44019	0.880992	0.584041	0.582576	0.207761	0.437644	0.375166	0.288954	0.437488	0.560569	0.713773	0.255488	0.509696	0.617895	0.663172	0.191454	0.370476	0.285255	0.243768	0.956366	1.06591	1.01488	0.328876	1.58082	0.577945
AC007663.4	0.169853	0.151258	0.386181	0.146986	0.102074	0.223563	0.120211	0.282924	0.45644	0.0940447	0.222197	0.206253	0.112454	0.0726757	0.15877	0.209419	0.28231	0.168857	0.489292	0.373149	0.152342	0.110884	0.275861	0.119574	0.0895364	0.257596	0.292748	0.0973378	0.080997	0.0767784	0.27424	0.187751	0.0959388	0.124881	0.18148	0.26893	0.113548	0.163184	0.122468	0.156743	0.162487	0.333626	0.249467	0.287624	0.155833	0.222557	0.256429	0.71111	0.1229
LINC00662	0.589893	0.513319	0.710839	0.279713	0.517988	0.540661	0.664039	0.661786	0.71177	0.311327	0.560261	0.533142	0.493388	0.461004	0.654633	0.56665	0.623973	0.455223	0.674463	0.567542	0.521829	0.404437	0.453873	0.518306	0.443716	0.566797	0.502934	0.320299	0.248331	0.432238	0.647995	0.401951	0.476712	0.59907	0.518033	0.409891	0.445666	0.539745	0.760664	0.450973	0.474554	0.727475	1.00316	0.813418	0.766082	0.929401	0.57948	1.17844	0.56033
AL450384.2	0.394685	0.921109	0.508358	0.294438	0.627047	0.731464	0.401339	0.467566	0.320015	0.216646	0.605335	0.413161	0.405478	0.553212	0.360451	0.251702	0.664481	0.351781	0.557924	0.502852	0.244134	0.388709	0.349979	0.67068	0.313875	0.903016	0.521266	0.770189	0.292052	0.358868	0.483428	0.616803	0.320304	0.487809	0.79978	0.227457	0.341184	0.569716	0.588777	0.313984	0.31464	0.0668312	0.414058	0.576162	0.874048	0.297214	0.616407	1.70937	0.320047
AC009118.3	0.761167	0.787166	0.976953	0.403715	1.00831	0.781018	0.376514	0.690174	0.742302	0.254906	0.513929	0.954103	1.16503	0.630355	0.650298	0.454101	0.994754	0.561427	0.92495	0.760093	0.616626	0.581059	0.332319	0.518567	0.420657	0.930945	0.987451	0.703553	0.234177	0.554951	0.852342	0.407118	0.577868	0.519015	1.18056	0.388763	0.923308	0.488645	1.53433	0.388434	0.528502	0.180858	0.79853	1.50145	0.67581	2.41295	0.926729	1.59336	0.355325
AL033397.2	0.156749	0.139589	0.0636407	0.0678231	0.117749	0.214912	0.0924473	0.0815928	0.0877554	0.0271217	0.205055	0.0951705	0.302688	0.0419181	0.0610506	0.090592	0.284955	0.116873	0.130253	0.156528	0.105442	0.0639557	0.0530374	0.045979	0.0774645	0.297154	0.225136	0.0280714	0.0311451	0.029523	0.221447	0.0866334	0.0737811	0.324131	0.251219	0.0344698	0.0982386	0.161352	0	0	0	0	0.452219	0.294927	1.07858	0.684625	0	0.0820311	0.141773
AC093157.1	0.898176	1.14936	0.759968	0.509462	0.982761	0.968601	2.03877	0.966487	1.41133	0.464917	1.10585	0.907354	0.591323	0.99306	1.16411	0.808449	0.948707	0.667807	0.861336	1.05519	0.629568	0.726776	0.541411	0.770455	0.726112	1.14467	0.823885	0.329809	0.389917	0.847257	0.840853	0.57567	0.781586	1.13067	1.11288	0.902915	0.996522	0.662981	0.997708	0.646763	0.866445	0.648604	1.54405	2.3858	1.31569	1.00545	0.512768	2.41735	0.163837
AC104695.4	0	0.773869	0.117606	0.125335	0.65279	0.0794302	0.17084	0.150781	0.0810848	0.250601	0.189468	0.879363	0.319634	0	0	0.0558039	0.526589	0.215978	0.240704	0	0.0649511	0.0590942	0	0.424839	0	0.549132	0.138682	0.0518751	0	0.272788	2.22153	0.480289	0.0681728	0.399324	0.154749	0.0636993	0.0605141	0.0993912	0.174047	0.0954682	0.230922	0	0.683746	0.476891	0.664394	1.42331	0.546645	0	0.130996
AP006621.2	1.9624	1.41149	0.858028	0.326578	0.982761	1.73852	0.356117	1.02149	0.169022	0.156714	0.394947	1.00817	0.333139	0.484419	0.705522	0.523456	0.627244	0.750345	0.919873	1.50741	0	0.184774	0.204306	0.177116	0.0497337	0.429251	0.578165	0.811006	0.239949	0.284315	0.609314	0.250291	0.710533	0.624295	2.01609	0.132782	0.63071	0.880522	0.997708	0.199004	0.481359	0.185315	0.237545	2.76923	1.0387	3.13174	4.27307	1.42197	0.273062
UBE2Q1-AS1	0.248096	0.397683	0.40291	0.0858779	0.099396	0.163273	0.0585285	0.258283	0	0.0686831	0.0649103	0.120505	0.164256	0.371538	0.154605	0.038236	0.206178	0.246641	0.0549756	0.247745	0.0890071	0.080981	0.0671561	0.116437	0.0326953	0.282193	0.142534	0.106632	0.157744	0.261675	0.24034	0.274239	0.046711	0.0456018	0.689205	0.0436458	0.207317	0.102152	0	0.0654134	0.158224	0.243655	0.416438	0.886915	0.227617	0.216719	0	0.727077	0.628296
AC005046.2	0.685935	2.19903	0.696229	0.534229	0.996186	1.12854	0.121365	0.28564	0.307214	0.37979	0.403794	0.874579	0.870427	0.586987	0.961767	0.713575	1.71012	0.647818	0.379991	0.684967	0.430652	0.503767	0.603438	1.24746	0.406782	1.56041	1.74051	0.368521	0.29984	0.671801	0.969053	0.98568	0.387439	1.48144	1.649	0.211176	0.51587	0.517788	0.37093	0.203462	0.656188	0.0842073	0.719604	1.77458	0.471986	3.7449	2.58891	1.72305	0.248159
AC104819.3	1.50842	0.742341	1.32155	0.309161	0.834926	0.391856	0.32776	0.371927	0.355572	0.989037	0.623139	0.433819	0.394215	0.636922	0.556578	0.917663	0.742239	0.90764	0.263883	0.872064	0.783262	0.842202	0.590974	0.512325	0.732375	0.827765	0.038009	1.27959	0.757172	0.807453	0.384545	1.4041	1.27054	1.13093	3.09612	0.488833	0.895608	1.7434	0.667826	0.889622	1.10757	0.487311	0.0416438	0.597501	0.182093	0.260062	0	0.830945	0.430832
AC000061.1	0.0570092	0.203072	0.185167	0.148002	0.228399	0	0	0.17805	0	0.197281	0.149155	0.138453	0.125813	0.121964	0.177631	0.219654	0.532991	0.056675	0	0.341572	0.30679	0.046521	0.115737	0.334448	0.0375648	0.756517	0.0545874	0.0408379	0.0453095	0.128849	0.0920453	0.252066	0	0.57633	0.243647	0.150439	0.0952775	0.234732	0.137016	0.187889	0.0454474	0	0.47846	0.965377	0.523034	0.871486	0	0.596689	0.103125
AC007255.1	1.8756	1.85585	1.72848	1.6875	2.44514	0.702075	3.02007	1.39473	1.31673	1.81323	2.08362	1.6449	1.05124	1.83115	1.13635	1.62885	1.96384	1.42065	0.791649	1.69458	1.2283	1.34833	1.49087	1.65923	1.11818	1.89069	0.242307	0.99168	1.44336	1.81677	1.82659	1.77707	1.97587	2.22993	2.60837	1.33556	2.46292	1.97153	1.27006	1.29519	1.40029	4.20305	1.07753	1.20434	3.82396	1.20279	1.51694	0.405086	1.85796
CRYZL2P-SEC16B	0.101149	0.114421	0.119871	0.0733374	0.150596	0.134933	0.0773911	0.0768425	0.0489756	0.039733	0.103711	0.0564335	0.0754142	0.111122	0.0894387	0.0884777	0.0993944	0.0597903	0.051491	0.0955468	0.0760096	0.0713864	0.0702994	0.0769815	0.0666499	0.088102	0.0392645	0.211497	0.0499728	0.0597274	0.0838632	0.139005	0.0694856	0.276368	0.207384	0.043284	0.0868081	0.108809	0.105125	0.0576632	0.10025	0.0738331	0.229436	0.941287	0.0877838	0.167162	0.30954	0.600875	0.168135
AC133644.1	1.07177	0.671642	0.902519	1.13359	0.636134	0.174158	4.21406	0.86783	0.488912	0.989037	0.519282	0.385617	0.175207	1.57107	0.432894	1.56003	0.37112	1.69689	0.527766	0.634228	1.42411	1.03656	0.456661	0.09315	0.863156	1.58028	0.038009	0.199047	1.73519	3.08028	0.192272	3.64189	1.15843	0.218889	1.22997	0.384083	1.02829	1.38927	0.429317	1.17744	0.537963	0.194924	0.166575	0.112031	0.182093	0	0	0	0
AC018521.6	0.831824	2.22227	0.831318	1.21818	1.47403	2.31604	0.905707	1.59873	1.50455	1.5057	0.837052	0.854688	1.90635	0.889789	2.29277	0.591688	1.39585	1.08139	1.91414	1.34182	1.0904	1.09651	1.34232	2.02705	0.758921	1.45561	4.16624	1.69593	1.52564	1.01233	2.06621	1.20239	1.08425	0.764477	0.752032	1.18196	0.855507	1.36121	1.61474	0.885717	1.17322	0.314206	0.134255	0.662156	0.293523	0.27947	1.69052	1.07155	1.5047
LINC00390	0.567409	0.224574	0.358353	0.872924	0.694603	0.069151	0.818022	0.0656342	0.0705915	0.479974	0.659794	0.229669	0	0.404633	0.196439	0.485822	0.39295	0.501407	0.139703	0.692521	0.508911	0.977488	0.469303	0.073972	0.332338	0.836618	0.120735	3.34198	1.10235	0.569967	0.101791	1.04533	1.00896	0.52147	0.875695	0.221823	0.316097	0.995081	0.454571	0.872691	0.301557	0.154793	0	0.0593108	0	0	0	0	0
FAM160A1-DT	2.33515	1.59962	2.62544	1.19174	1.85909	0.525393	0.706266	1.18435	0.938591	2.23777	2.2715	0.872485	0.924974	1.53715	2.51859	1.70716	1.24398	2.02384	0.796071	1.49478	2.57773	2.49186	1.53971	1.75632	1.30197	1.92963	0.114664	1.97299	1.99868	2.43589	2.17515	1.787	2.42375	2.14609	1.91923	1.00068	2.25153	2.9995	1.29514	3.03898	1.6229	1.02907	0.879405	1.63353	1.09866	0.130758	0.225987	1.12804	0.324929
LINC01376	0.122984	0.193271	0.0998641	0.0563438	0.0869505	0.182505	0.145067	0.0602515	0.162005	0.0500694	0.113566	0.131771	0.063862	0.077385	0.123976	0.0891958	0.172847	0.0934956	0.144276	0.0722417	0.116794	0.0590344	0.0685387	0.0679055	0.100105	0.123429	0.124687	0.0777339	0.0804959	0.0490522	0.140165	0.143941	0.0612934	0.172865	0.139133	0.0699983	0.0967245	0.104255	0.139097	0.0476858	0.0461376	0.124336	0.303579	0.632942	0.232303	0.126389	0.109218	0.484601	0.444936
VASH1-AS1	0.267507	0.40394	0.24555	0.130844	0.326178	0.650613	0.452731	0.387466	0.299526	0.136845	0.42602	0.607299	0.539024	0.348354	0.217437	0.188213	0.579937	0.277502	0.335044	0.51103	0.281655	0.256257	0.0944485	0.491274	0.206922	0.418925	0.43433	0.116642	0.129414	0.201535	0.356794	0.488541	0.229931	0.566522	0.410088	0.317148	0.262414	0.295315	0.50316	0.245327	0.241071	0.285565	0.719897	0.62368	0.373474	0.888982	0.219489	0.316508	0.21039
AL589745.1	0.19919	0.160218	0.8922	0.478198	0.238121	0.0281911	0.0606339	0.147166	0.00719458	0.453605	0.319415	0.28089	0.070902	0.151212	0.0900936	0.574365	0.173545	0.198023	0.341719	0.275906	0.524438	0.220222	0.139144	0.0527738	0.359884	0.535963	0.0492203	1.32101	0.612819	0.924602	0.108931	0.944645	0.241956	0.265737	0.528632	0.11304	0.311423	0.970077	0.162152	0.385421	0.286853	0.12621	0.0134818	0.132987	0.0884266	0.140321	0.606291	0.322813	0
KLF7-IT1	0.0654518	0.145716	0.0265736	0	0.16389	0.179476	0	0	0.0366429	0.0226497	0	0	0.0722226	0.0350064	0.101969	0.0252182	0.0679914	0	0.0362587	0.0326797	0.0880559	0.0534104	0.110731	0.153591	0.0431278	0	0.250685	0.187543	0	0.0246551	0.0528382	0.108523	0	0.0601526	0.0349661	0.115145	0.0546936	0.0224579	0	0.0647143	0.0260889	0.0803504	0.0343323	0.277085	0	0.142935	0	0.342527	0.0591983
AL442125.1	0.140268	0.340668	0.253682	0.0606918	0.312911	0.461555	0.0752062	0.232316	0.27128	0.154445	0.216857	0.456787	0.703537	0.122762	0.546314	0.142481	0.384145	0.145784	0.395589	0.248305	0.182991	0.301764	0.159641	0.209463	0.121834	0.0966942	1.29425	0.137017	0.202693	0.144102	0.452944	0.126858	0.0900318	0.263682	0.292927	0.134598	0.170491	0.249394	0.145574	0.134485	0.188062	0.453973	0.187285	0.44386	0.380219	0.570869	0.144385	0.293624	0.0807329
INE1	1.27025	1.91898	1.1788	0.569248	1.88568	1.02007	0.347827	0.42506	0.304776	0.706455	0.741832	0.798778	0.500591	0.436746	0.742104	0.646734	1.50804	1.2177	0.753951	0.815436	0.325512	0.481258	0.491199	1.6767	0.538071	0.774014	0.347511	0.6337	0.414642	0.717736	0.970518	1.22859	1.00362	1.25079	2.47205	0.419	0.777142	0.700471	0.572422	0.792436	1.01264	0.167078	1.11843	2.06991	1.87296	1.28793	2.22592	2.94392	0.328253
AC008115.3	1.17134	0.625861	1.23647	0.304092	0.703919	0.428258	0.87505	1.01619	0.874358	0.648549	0.408616	1.13789	0.344669	1.00237	0.547454	0.872532	1.41958	0.815129	0.302816	1.0917	0.630345	0.382336	0.449175	0.32068	0.643186	0.962231	0.598175	0.279691	0.341348	0.588308	0.283681	0.604225	0.624855	1.11239	2.33617	0.652541	0.652538	0.723437	0.938397	0.746356	0.342387	1.43797	2.37574	4.22414	1.25376	3.24012	0.147365	1.71638	0.988794
AC009404.1	0.206009	0.249311	0.210173	0.0777091	0.211627	0.318661	0.149538	0.148478	0.141948	0.0621499	0.110562	0.243743	0.198176	0.15821	0.263339	0.101762	0.263387	0.110277	0.25751	0.216267	0.137393	0.0905199	0.121536	0.24791	0.0974574	0.16022	0.460267	0.147572	0.0671715	0.0875504	0.153515	0.192684	0.144208	0.228166	0.457153	0.106867	0.150077	0.181246	0.133302	0.13231	0.0968529	0.19454	0.908815	0.800067	0.678475	0.184569	0.657914	0.984111	0.181548
TMCC1-AS1	0.222562	0.198196	0.184486	0.100312	0.157898	0.23903	0.153139	0.193084	0.269967	0.128363	0.236558	0.174541	0.184189	0.233111	0.252826	0.14292	0.197481	0.152114	0.231176	0.263919	0.137236	0.117294	0.109821	0.136007	0.12832	0.158218	0.110993	0.089679	0.0663324	0.143221	0.187157	0.123007	0.161503	0.251417	0.203118	0.118277	0.255722	0.254551	0.367747	0.158928	0.0924088	0.170764	0.0729644	0.401307	0.191428	0.243017	0.0350004	0.815307	0.100649
CHN2-AS1	0	0.095683	0	0.0232451	0.0538084	0.0589257	0.0633693	0.0559289	0	0	0	0.0652359	0.0592805	0	0	0	0.111615	0.080112	0	0	0.0963686	0	0.0545328	0.0630338	0	0	0.0257204	0.0962095	0.0213488	0	0.0433697	0.029692	0.0252871	0.0493734	0.0287003	0.0236278	0	0.0368669	0	0.0354117	0.0214138	0.263807	0.1409	1.03608	2.09476	0.234643	0.202766	0.112459	0
CASC2	0.115382	0.146515	0.140537	0.118339	0.188329	0.288267	0.128539	0.318096	0.342121	0.0576741	0.215229	0.150487	0.292361	0.0891386	0.256319	0.0987915	0.244158	0.0870915	0.158614	0.166428	0.1284	0.163899	0.117122	0.102788	0.0901076	0.149873	0.294615	0.0673467	0.0679281	0.144878	0.236316	0.070856	0.13678	0.166916	0.120998	0.0864563	0.10713	0.136366	0.156629	0.136617	0.132863	0.215093	0.201743	0.418108	0.225438	0.237976	0.0564518	0.232585	0.239637
AC026368.1	0.155329	0.138324	0.100903	0	0.155576	0.170372	0.036644	0.064683	0	0.0430016	0	0.0377234	0.137118	0.0664614	0.0483981	0	0.0968138	0.0926513	0.0344195	0.031022	0.0278631	0.0253506	0.0420456	0.25515	0.0614103	0.117785	0	0.0222537	0.0246904	0.0234044	0.050158	0.103018	0.0584903	0.114203	0.0663849	0.0273261	0.103839	0.127912	0.111996	0.102386	0.123828	0	0.260726	1.08135	0.285016	0.881951	0	0.390183	0.0561955
SEC24B-AS1	0.149318	0.221619	0.188607	0.129216	0.174482	0.109186	0.264194	0.302263	0.269362	0.103344	0.184482	0.100732	0.091536	0.177471	0.219702	0.127848	0.0947906	0.0824683	0.220583	0.173959	0.141364	0.135386	0.10666	0.233596	0.131186	0.188711	0.119146	0.10102	0.138454	0.149991	0.154026	0.146714	0.124948	0.182972	0.274763	0.0948587	0.180231	0.153702	0.289091	0.131232	0.178553	0.346247	0.0522159	0.273142	0.342482	0.21739	0.0626188	0.520949	0.150058
AC084824.5	0.879704	1.09675	0.547649	0.507514	0.704882	0.546776	0.345887	0.457913	0.393999	0.385603	0.460321	0.640936	1.00306	0.345036	0.822304	0.384138	1.15753	0.320667	1.52698	0.819898	0.447105	0.526432	0.535779	1.2042	0.695591	1.38973	0.954645	0.588155	0.326278	0.397651	0.757516	0.810337	0.276048	1.02408	1.19057	0.644836	0.563584	0.704304	1.05714	0.44456	0.584413	0.287987	0.492206	1.84829	0.134515	0.768447	0.22135	0.552448	0.477392
AC012173.1	0.0996998	0.221962	0.161914	0.172555	0.199717	0.164033	0	0.0518968	0	0.138005	0	0.181599	0.110014	0.106647	0.155324	0.0384138	0.0517841	0.0495577	0	0	0.0447105	0.0406788	0	0.467916	0.0985421	0.0945017	0.0477322	0.178547	0.118858	0	0.362188	0.110206	0	0.137442	0.213049	0.0876976	0.0833124	0.102627	0.0599047	0.0328588	0	0.244789	0.15689	0.609659	0.457351	0.544317	0.752591	0.104351	0.180348
AC009022.1	1.25864	1.10524	1.10743	0.361041	2.58098	1.12288	0.73198	0.576688	0.518179	0.660005	0.78886	1.00046	0.595772	1.57136	0.507966	0.453879	1.65347	0.634345	0.485555	1.21135	0.591168	0.35762	0.495861	1.0284	0.598333	1.3625	0.238349	1.12262	0.404036	0.515058	1.14911	1.151	0.785514	1.37262	2.47608	0.456418	0.931644	0.996058	1.85377	0.45064	0.642835	0.473442	0.73929	3.13666	1.19013	1.84519	2.95085	1.51919	0.742012
THUMPD3-AS1	1.37665	1.81914	1.4091	0.650346	1.50886	1.23645	1.57549	1.15579	1.10539	0.744733	1.19315	0.974796	1.03281	1.04871	1.14952	0.755482	1.51523	0.848996	1.25276	2.16269	0.808851	0.696888	0.929291	1.6914	1.23574	1.73552	0.817724	0.868692	0.575572	0.792655	1.34024	1.78226	0.832892	1.46926	2.3505	0.8173	1.43012	1.29869	1.77747	0.929944	0.983084	1.1742	1.24712	4.04277	2.17815	3.20778	1.16037	3.61113	1.03194
AL450344.3	0.0567076	0.353496	0.0460469	0.0490731	0.0567977	0	0.133779	0	0	0.117742	0.0741832	0.0688601	0.187722	0.0606592	0	0.131095	0	0.0563751	0.0628293	0	0	0.0462748	0.0383749	0.199607	0	0	0	0.0406218	0.0450698	0.0854448	0.0457791	0	0.053384	0.104233	0.0605894	0.0498809	0	0.116745	0	0	0	0	0.118982	0.0533483	0.260133	0.123839	0.428061	0.237413	0.205158
AC131971.1	0.0578555	0.0772825	0.0587238	0.0250332	0.0579475	0.0475938	0.0682438	0.0150578	0	0.0100105	0	0.035127	0.0319202	0.108302	0.0450671	0.0445828	0.150251	0.0575163	0.0961517	0.0433304	0.0389181	0.0590145	0.0587276	0.0678826	0.0190612	0.0548391	0	0.0621662	0.0344866	0.0326904	0.128441	0.0959281	0.0953131	0.0664642	0.0927239	0.038168	0.024173	0.0694799	0.0869062	0.00953393	0.023061	0	0.0606954	0.353783	0.1327	0.252692	0.436726	0.0605547	0.0784916
AC007292.2	0.224765	0.147485	0.134481	0.122845	0.296213	0.16868	0.111631	0.172417	0	0.171935	0.185704	0.201108	0.234963	0.354314	0.0921487	0.127622	0.19662	0.30577	0.196602	0.177195	0.180372	0.193067	0.128086	0.194319	0.155898	0.156981	0.0679631	0.567764	0.150432	0.11586	0.133699	0.117687	0.111364	0.228311	0.290709	0.156084	0.158165	0.170479	0.142158	0.171548	0.132028	0.34854	0.297849	0.244837	0.43413	0.025834	0.267892	0.14858	0.106995
AL390195.2	0.049792	0.288216	0.0606471	0.0861771	0.174549	0.191149	0.205564	0.129591	0.195131	0.0516918	0.195409	0.120925	0.1923	0.159785	0.271502	0.0575538	0.362068	0.0990002	0.0827507	0.248609	0.200964	0.101579	0.13478	0.350529	0.0984277	0.141588	0.14303	0.0535019	0.0791469	0.168806	0.261276	0.0825583	0	0.274564	0.372403	0.262787	0.166431	0.153762	0.179505	0.114872	0.0992348	0.244504	0.365653	0.608951	0.342614	0.434948	0.0939645	0.260575	0.0450347
AC019080.5	0.368112	0.428678	0.206937	0.29405	0.226891	0.745406	0.233805	0.265311	0.412172	0.235174	0.481554	0.481384	0.249965	0.393764	0.397031	0.458226	0.264735	0.365954	0.627463	0.424145	0.330161	0.43903	0.26827	0.431911	0.317192	0.2684	0.189794	0.182557	0.112526	0.661322	0.34289	0.281702	0.373194	0.390356	0.45382	0.273983	0.378593	0.252614	0.986805	0.242643	0.406325	0.973334	1.01001	0.825806	0.649474	0.55654	0	0.829847	0.921992
AC016831.1	0.100393	0.126893	0.0499635	0.100889	0.107039	0.13498	0.0687593	0.0337145	0.119661	0.0358617	0.0847295	0.117975	0.16438	0.0969961	0.035317	0.074866	0.178299	0.0643898	0.11123	0.106719	0.0406644	0.0634243	0.0591712	0.170988	0.0362765	0.116646	0.0403117	0.0626358	0.0978066	0.0585553	0.122875	0.150349	0.054876	0.0952409	0.173008	0.0712154	0.124484	0.0733383	0.0778335	0.0448278	0.0826142	0.230587	0.210641	0.658072	0.28226	0.544563	0.342242	0.379631	0.246041
RNF213-AS1	0.139925	0.210873	0.12673	0.0605436	0.231783	0.301049	0.0444364	0.112054	0.10244	0.0633202	0.0352012	0.150306	0.302862	0.0921082	0.159302	0.0663538	0.218032	0.101654	0.178881	0.118231	0.106192	0.122966	0.0546286	0.157861	0.0815618	0.0714161	0.376178	0.100234	0.0812682	0.064872	0.204196	0.172516	0.106393	0.143435	0.189755	0.104145	0.130417	0.15142	0.181083	0.0674006	0.124418	0.0264271	0.107272	0.607552	0.148125	0.0587638	0.690615	0.326703	0.155761
AL022322.1	0.882549	1.30544	0.874537	0.478951	1.78289	0.459398	0.141155	0.389317	0.15074	1.00422	0.567478	0.744727	0.346623	0.78404	0.302953	0.518707	1.47619	0.550218	0.497197	0.791679	0.375656	0.183097	0.354292	1.49183	0.59139	0.964142	0.114584	1.00724	0.273438	0.518393	1.07474	0.992083	0.802659	1.20977	2.49326	0.263154	0.774986	0.410604	0.754974	0.552157	0.465067	0.514176	0.282469	1.08357	0.754804	2.22133	1.91955	6.60697	0.91999
AC093788.1	0.231235	0.514799	0.281646	0.140073	0.347403	0.278991	0.190928	0.24073	0.155347	0.144035	0.362993	0.308868	0.178609	0.395757	0.216147	0.213825	0.33629	0.183903	0.307436	0.484908	0.165916	0.30191	0.031296	0.596883	0.243786	0.569865	0.0664235	0.11595	0.0735119	0.156787	0.261341	0.255601	0.0435364	0.340021	0.222357	0.183058	0.328486	0.333234	0.250087	0.121936	0.110603	0.113548	0.048517	0.783132	0.318221	1.91891	0.174549	0.387236	0.376455
TNFRSF10A-AS1	2.55745	2.30743	1.83074	1.68898	1.88743	1.10729	1.46863	1.22613	1.20571	2.07279	2.81733	1.5119	1.78232	1.97976	0.52425	1.55585	2.20225	1.73958	1.45405	1.54574	0.814897	1.07093	2.09502	3.75086	1.79603	3.44479	0.257769	1.832	1.39072	1.5211	1.87443	1.41347	1.9007	2.19576	2.51679	1.83518	1.49034	1.87049	1.65796	1.17559	2.25339	0.413105	0.88256	3.41898	0.771824	5.29107	0.508028	3.31074	4.07836
AC108058.1	0.172535	0.402408	0.466999	0.135087	0.979254	0.144186	0.0387648	0	0.128791	0.210393	0.096731	0.219487	0.217581	0.0966734	0.115198	0.101298	0.315786	0.171524	0.136544	0.246131	0.0810582	0.221247	0.194596	1.01219	0.173239	0.654159	0.118004	0.158906	0.104478	0.111416	0.577038	0.935419	0.177892	0.241625	0.482811	0.252942	0.315814	0.169144	0.118478	0.108312	0.523978	0.0403446	0.0775733	0.772927	0.113067	0.16148	0.403122	0.171986	0.297239
AC124045.1	0.373172	0.518026	0.365404	0.303936	0.285821	0.517659	0.245982	0.2171	0.294945	0.26587	0.244087	0.573094	0.544998	0.46962	0.495876	0.279105	0.661288	0.41463	0.668828	0.317845	0.354388	0.394083	0.363943	0.373458	0.376071	0.582591	0.367829	0.330216	0.21808	0.264603	0.425303	0.376099	0.278974	0.403482	0.469079	0.415138	0.440238	0.331406	0.23741	0.383437	0.516234	0.269481	0.39149	0.495623	0.956619	0.64716	0.207126	0.597361	0.29781
ZKSCAN2-DT	0.639967	0.74149	0.519657	0.297747	0.496246	0.452867	0.137988	0.308049	0.1541	0.280994	0.324072	0.467939	0.303729	0.471097	0.192971	0.296952	0.721986	0.444667	0.327842	0.907058	0.308596	0.224615	0.237493	0.48444	0.417156	0.795756	0.362397	0.280975	0.213296	0.378453	0.399976	0.5857	0.226732	0.727287	0.691128	0.278436	0.534777	0.472228	0.520969	0.299369	0.362062	0.321015	0.671381	1.51485	2.52534	2.75007	0.675278	1.58453	0.398329
AL359921.1	0.26035	0.30913	0.140937	0.150199	0.391145	0.190375	0.102366	0.180693	0.388682	0.150157	0.283818	0.210762	0.0957608	0.232077	0.0676006	0.200623	0.270452	0.129412	0.288455	0.216652	0.19459	0.177043	0.176183	0.305472	0.142959	0.411293	0.124645	0.186499	0.20692	0.261523	0.280235	0.335748	0.0816969	0.398785	0.509981	0.152672	0.181297	0.41688	0.677868	0.0572036	0.207549	0.213075	0.500737	1.10217	0	0.758077	0.491317	0.90832	0.0784916
AL590723.1	0.272629	0.303478	0.304393	0.147453	0.0341328	0.0747579	0.0401977	0.283824	0.114473	0.11793	0.445807	0.0413818	0.263228	0.21872	0.106183	0.157564	0.177005	0.203273	0.264302	0.238214	0.122261	0.166854	0.392046	0.279894	0.269463	0.452226	0.0326309	0.170883	0.216679	0.128371	0.137556	0.263688	0.25665	0.250556	0.0728229	0.299761	0.142386	0.30402	0.204762	0.29202	0.190171	0	0.464768	0.609137	0	0.372108	0	0.428023	0
AP002807.1	0.762386	1.7052	0.561475	0.460288	1.13652	1.01124	0.313701	0.332243	0.555857	0.429482	0.278325	0.602825	0.332588	0.891374	0.359083	0.505512	0.920892	0.423023	0.451809	0.7259	0.270334	0.303829	0.335947	0.395252	0.443942	0.537777	0.526279	0.304815	0.338191	0.320577	0.543897	0.411562	0.534104	0.716956	1.59126	0.467866	0.711153	0.900358	0.681793	0.257109	0.466428	0.130594	0.613807	1.01746	1.21998	1.54876	2.54287	1.70725	0.545221
SNHG3	3.38731	6.84543	2.95489	2.86321	3.69205	4.37675	8.40543	4.35614	3.31718	1.70565	3.35425	3.5147	2.91033	4.12815	3.27575	2.66275	6.88496	2.75755	3.86335	3.27257	1.74949	1.98966	2.57256	4.70034	2.06614	3.30016	1.44096	1.81797	1.28356	2.46897	4.25417	2.94439	2.21141	5.93698	5.18226	6.07898	2.95323	2.5656	3.40891	2.1187	4.71515	2.51046	4.3237	14.4287	9.83785	12.2639	17.475	6.35527	7.89156
AL391834.1	0.80383	1.3294	0.870286	0.23187	0.690092	0.419845	0.0903012	0.478192	0.942901	0.503349	0.650957	1.4409	1.18264	0.450395	0.954134	0.737408	1.55075	0.570798	1.22988	0.573354	0.720958	0.655946	0.518061	0.763497	0.60533	1.88666	0.47647	0.548394	0.152111	0.288376	1.01973	0.676978	0.43241	0.949821	0.899753	0.774401	0.607734	0.656692	1.10396	0.555079	0.701838	1.12778	0.722817	1.62045	1.05354	1.33746	0	1.44228	0.83089
U47924.1	0.197562	0.175933	0.160421	0.0854822	0.098938	0.0541736	0	0.154256	0.165906	0.136733	0.193833	0.11995	0.217999	0.0528322	0.0769463	0.0761195	0.153921	0.245505	0	0	0.0885969	0.0806078	0.0334233	0.115901	0.0650893	0.0936307	0	0.176901	0.0785086	0	0.0797443	0.163785	0.0464957	0.0907834	0.474943	0.0868894	0.0825445	0.237256	0.356115	0.0651119	0.196869	0.121266	0.155445	0.557576	0.906271	0.64716	0	0.827116	0.089343
AL162595.1	0.389736	0.347069	0.391817	0.208784	0.44612	0.325698	0.656736	0.347776	0.249362	0.282582	0.582675	0.405649	0.266223	0.178669	0.260218	0.300326	0.424137	0.258301	0.185061	0.518914	0.249682	0.333179	0.188386	0.435506	0.305722	0.562919	0.0533113	0.186122	0.177001	0.237692	0.419503	0.307717	0.366893	0.460519	0.495732	0.261195	0.449743	0.483962	0.624461	0.42816	0.41426	0.227834	0.467276	1.22216	0	0.810584	0.280185	1.08778	0.268571
AP001107.4	0.159076	0.247906	0.161463	0	0.35849	0.261722	0.0938194	0.124206	0.133587	0.110097	0.156074	0.434624	0.263298	0.255241	0.247827	0.0919366	0.578368	0.237215	0.396559	0.27799	0.142676	0.064905	0.0538246	0.466614	0.157229	0.452346	0.190398	0.0854641	0.12643	0.0898835	0.417363	0.219798	0.262067	0.548237	0.637369	0.174907	0.0996967	0.136455	0.238952	0.0786417	0.190221	0	0.500652	0.860501	0.182431	0.0868483	0	0.499492	0.215816
AL731569.1	0.294405	0.205994	0.199215	0.0849231	0.0982909	0.1999	0.0909508	0.094867	0.180518	0.101879	0.146717	0.221307	0.108287	0.239939	0.0873635	0.129637	0.254857	0.118465	0.124261	0.237991	0.106878	0.154441	0.104358	0.0904694	0.110852	0.212613	0.161085	0.0803403	0.0835662	0.110899	0.175422	0.100728	0.0923832	0.173937	0.157279	0.0616579	0.175724	0.187602	0.19374	0.147854	0.0614684	0.206525	0.0955982	0.43523	0.900343	0.352079	0.555583	0.4402	0.228237
AL021578.1	0.0907001	0.376929	0.073649	0	0.181689	0.0994838	0	0	0.203112	0.0627739	0.0395504	0.110137	0.166805	0.226381	0.141303	0.116488	0.408284	0.210393	0	0.0905721	0.108466	0.0246712	0.0204594	0.425678	0.0199215	0.171942	0.0578981	0.151601	0	0.0683317	0.536953	0.267354	0.0853842	0.583498	0.193818	0.0531876	0.075792	0.165979	0.0363315	0.119571	0.0482037	0.222692	1.01496	1.08081	0.416066	1.51856	0.342328	0.632878	0.382827
AL022157.1	0.161169	0.0861147	0.157044	0.0278942	0.290565	0.212133	0.0760431	0.167787	0.108276	0.133855	0.295171	0.0782831	0	0.31032	0.251088	0.149034	0.066969	0.0961344	0.071427	0.225318	0.144553	0.0526072	0.174505	0.0378203	0.191157	0.244425	0.185187	0.230903	0.230568	0.0728529	0.208175	0.213783	0.242756	0.207368	0.413284	0.0567067	0.107742	0.176961	0.348618	0.148729	0.128483	0	0.270528	0.667134	0.147865	0.140786	0	0.202426	0.0583081
LINC00265	1.65153	1.58716	1.26841	0.720547	1.31643	1.19255	0.495135	0.76654	0.3082	0.762019	0.909202	1.20327	0.858035	0.868585	0.578913	0.689352	1.47971	1.4503	0.815792	1.26438	0.555473	0.797383	0.805615	0.871991	0.970342	0.847937	0.68526	0.685185	0.721927	0.668774	0.894391	0.981238	0.796801	1.44825	3.02185	0.617402	1.29382	1.40724	1.84406	0.89357	0.795439	1.65576	2.36788	3.76124	3.03041	2.28421	2.75306	2.14632	0.834002
AC243967.2	0.037805	0.0673325	0.0306979	0.130862	0.0757303	0.0829325	0.178373	0.0787148	0.25398	0.497135	0.0494554	0.0918135	0	0	0.0588972	0.145661	0.0785438	0.0375834	0	0.0755034	0	0.0616998	0.0511666	0.133071	0.124553	0.071668	0	0.0541624	0.060093	0.0569632	0.183117	0.0417888	0.284714	0.0347443	0.121179	0.266032	0.0947734	0.0259434	0.0454303	0.0996775	0.0602759	0.371284	0.634572	0.177828	1.21395	0.908154	0	0	0.068386
AC121761.1	0.216958	0.32201	0.293619	0.0375499	0.46358	0.20624	0.324158	0.240925	0.307707	0.180189	0.189212	0.228326	0.271322	0.278492	0.428137	0.100311	0.330552	0.330719	0.464733	0.37553	0.181618	0.224255	0.127243	0.25456	0.400286	0.219356	0.166193	0.797799	0.160937	0.217936	0.151794	0.223832	0.204242	0.305735	0.339988	0.508907	0.024173	0.238217	0.156431	0.152543	0.357446	0.355125	0.288303	0.721174	0.530798	0.284279	0.76427	1.39276	0.497114
AL132989.2	0.0380736	0.203433	0.015458	0.0823696	0.0572013	0.0835217	0.08982	0.039637	0.0213154	0.0131755	0.0747102	0.0924658	0.0420123	0.0407268	0.118631	0.102687	0.237306	0.151402	0.0843675	0.0760398	0.0341484	0.0466036	0.0901776	0.223361	0.0752631	0.216531	0.0911406	0.0409104	0.03026	0.0286839	0.184418	0.126257	0.0537632	0.174956	0.1017	0.0502353	0.174986	0.117575	0.0457531	0.0376447	0.197289	0.0934805	0.079885	0.179091	0.174654	0.291011	0	0.0796999	0.378795
AC211433.1	0.00752914	0.107278	0.0244548	0.0065155	0.0226233	0.0165166	0.0266431	0	0.0168606	0.00521094	0.0098494	0.027428	0.024924	0.0241614	0.0351894	0.00580188	0.0469277	0.01497	0.0166839	0.0451111	0.0135058	0.00614397	0.0152853	0.0618382	0.00496114	0	0.0288372	0.0215736	0	0.0283615	0.0182345	0.0332901	0.00708786	0.062276	0.00804454	0	0.0251664	0.0310008	0.0180955	0.0198515	0.0180066	0.0739439	0.0315949	0.0849975	0.0345382	0.0657692	0.0568342	0.0788041	0.0136196
LINC00582	1.07716	0.575541	1.13706	0.745714	0.323661	0.511972	2.62584	0.822352	0.884463	0.0994007	0.704554	0.566798	0.158478	1.76674	0.67125	1.38341	0.223791	1.24932	0.358032	0.394401	0.772886	0.439495	1.0934	1.30597	1.23026	1.4294	0.06876	0.128602	0.827562	0.649209	0.0579716	0.3572	1.08163	0.362981	0.997442	0.789572	0.600073	0.936308	0.431474	0.946686	0.486599	0	0.188339	0.20267	0	0	0	0	0
AL021707.1	0.0857418	0.229065	0.174057	0.148397	0.429391	0.329159	0.0505687	0.133894	0	0.148356	0	0.0520583	0.0946116	0.27515	0	0.132143	0.178137	0.298337	0.0949978	0.171242	0.192255	0.174919	0.145057	0.301806	0.169492	0.243814	0.0410497	0.245681	0.102218	0.0645963	0.34609	0.284331	0.161433	0.2364	0.183222	0.22626	0.107473	0.264778	0	0.19781	0.0683529	0	0.0899506	0.201657	0	0.187245	0.485421	0.44871	0.155099
AC005261.1	3.66487	4.37096	3.96105	2.1695	2.75302	3.70505	1.03916	1.59847	0.90751	2.5295	2.31153	3.36826	2.44417	2.56324	3.36457	3.46807	3.63973	3.0078	4.5346	2.93077	2.98903	2.88793	2.65041	5.00883	3.41333	5.08662	2.70419	2.48825	2.24458	2.87861	3.19837	2.8324	2.0236	3.45143	3.93726	1.85096	3.99217	2.81554	2.25043	3.07274	2.93365	3.0406	2.9047	8.78992	5.79636	10.1692	2.07104	14.3317	4.40748
AL135999.1	0.429635	0.782857	0.413272	0.148717	1.03938	0.391493	0.140339	0.199554	0.140617	0.132664	0.293988	0.369208	0.102109	0.487855	0.16476	0.259764	0.336445	0.302267	0.234346	0.547836	0.160065	0.118662	0.196809	0.348989	0.239544	0.338318	0.164553	0.213067	0.162852	0.244004	0.389525	0.482214	0.311118	0.449522	1.01696	0.226748	0.287213	0.303905	0.397148	0.148133	0.210771	0.129829	0.575539	0.572075	0.515454	0.822769	1.17251	0.581124	0.298912
AC092301.1	0.140284	0.499706	0.159476	0.0728388	0.309116	0.15387	0.0330947	0.0876269	0.0942452	0.0194183	0.146813	0.0340695	0.216715	0.15006	0.0437103	0.172963	0.26231	0.139462	0.0310857	0.168104	0.17615	0.0686854	0.0189865	0.263356	0.0739496	0.319129	0.080595	0.261277	0.0445978	0.105688	0.249149	0.0620268	0	0.232068	0.569572	0.0493586	0.093781	0.231045	0.16858	0.0739753	0.111834	0.206661	0.235473	0.475107	0.257409	0.612712	1.16484	0.587317	0.0507524
RHOA-IT1	0.497535	0.553833	0.269334	0.107638	0.332217	0.13643	0	0.129491	0.0464238	0.258259	0.108477	0.302079	0.274502	0.354804	0.129186	0.0638992	0.77526	0.206091	0	0.414027	0	0	0.140287	0.437823	0.109279	0.471595	0.0396999	0.0891008	0	0.0624722	0.569007	0.412472	0.0780624	0.419149	0.531593	0.07294	0.173232	0.170714	0.348768	0.163976	0.165263	0.203596	0.217482	0.546072	0.190194	0.543264	0	0.260373	0.0749997
AL138689.1	0.256712	0.657248	0.495073	0.111076	0.25712	0.140787	0.227105	0.0668133	0.143719	0.0666267	0.0419779	0.116897	0.849805	0.102975	0.24996	0.0741824	0.56668	0.255207	0.106659	0.224306	0.115123	0.130927	0.173721	1.76957	0.211443	0.669152	0.0614517	0.0919464	0.204028	0.217577	0.569909	1.41882	0.0302083	0.442365	0.685713	0.0564521	0.160888	0.110104	0.0385614	0.169213	0.127906	0.23636	0.235649	0.362257	0.441603	0.770844	0	0.0671722	1.33506
AC139149.1	0.291182	0.159572	0.236441	0.0387662	0.381381	0.22111	0.0792612	0	0.0752386	0.0775107	0.146506	0.163192	0.123578	0.239594	0.0697904	0.103561	0.139606	0.133604	0.0992663	0.246037	0.0200894	0.0913892	0.151575	0.341647	0.059036	0.127385	0.107235	0.0641799	0.0890093	0.151872	0.198902	0.272348	0.0210858	0.432288	0.215387	0.0985109	0.168453	0.0768542	0.215331	0.132877	0.124992	0.219977	0.211482	0.421435	0.308246	0.0978291	0.422693	0.375097	0.28362
AC090739.1	0.302761	1.18631	0.540856	0.2358	0.667133	0.265665	0.142849	0.126077	0.1356	0.314313	0.118819	0.183821	0.501121	0.161929	0.141503	0.186643	0.974975	0.150493	0.536711	0.393033	0.244392	0.0741182	0.0819532	0.568373	0.139648	0.975717	0.14495	0.0433758	0.0962507	0.250904	0.586594	0.669329	0.370521	0.890395	0.582275	0.079894	0.505993	0.270097	0.254679	0.279393	0.289631	0.446013	0.539957	0.88296	0.694423	1.78517	0	0.253509	0.273834
SFTA1P	1.12529	0.488829	1.84978	0.451271	1.04461	0.451562	3.91729	0.971487	0.0921938	0.132969	1.54388	0.533247	0.514852	0.792686	0.513107	1.22669	0.855333	0.954985	0.63859	0.904445	0.492331	1.16463	0.650064	0.708464	0.632974	1.50888	0.0262802	1.67116	0.654406	0.392871	1.2851	0.424737	0.723452	0.68105	2.19937	1.30367	1.46784	0.734553	0.95648	0.597012	0.13128	0.202162	0.25914	0.103281	0	0.0599376	0	0.0574533	0.198591
HCG25	0.171608	0.1945	0.202687	0.121504	0.296886	0.136893	0.202422	0.162414	0.122276	0.0863788	0.163268	0.208385	0.206576	0.183567	0.0729142	0.144261	0.178267	0.124075	0.190134	0.233681	0.139924	0.178229	0.0527865	0.219655	0.143916	0.266173	0.0597522	0.12293	0.0991929	0.152793	0.214102	0.258671	0.220296	0.157715	0.600073	0.0960589	0.247694	0.192706	0.14998	0.0822666	0.136805	0.153216	0.343698	0.440298	0.42939	0.442901	0.647699	0.130629	0.0282204
AC144548.1	0.135954	0.242141	0.0551978	0.0980424	0.158865	0.248534	0.106911	0.141537	0	0.0627296	0.0889257	0.0550299	0.150018	0.12119	0.0706019	0.0698433	0.376612	0	0.0251051	0.158389	0.040646	0	0.12267	0.239275	0.0746531	0.171821	0.130179	0	0.0360177	0.0170709	0.256092	0.100187	0.042662	0.22907	0.290522	0.0199313	0.113608	0.108847	0.136147	0.0746791	0.162573	0	0.237713	0.426335	0.207887	0.44535	0.0855217	0.237162	0.122965
AC145423.3	0.229502	0.0408753	0.0745427	0.0397208	0.13792	0.201382	0.054142	0.0477851	0.154183	0.127071	0.120091	0.278685	0.202595	0.147297	0.143018	0.106111	0.190725	0.0912625	0.203422	0.275013	0.0823363	0.0374559	0.124246	0.161566	0.12098	0	0.131851	0.0328802	0.0729609	0.0691609	0.148219	0.304423	0.0864203	0.168737	0.147127	0	0.0767116	0.125995	0.0551585	0.0907663	0.073183	0	0.14446	0.647719	0	0.601429	0.866204	0.288251	0.166059
C2-AS1	0	0.125254	0.0685265	0.07303	0.0281752	0.0308548	0	0	0.062995	0.0778769	0.0367995	0	0	0.0300908	0	0	0.0876661	0	0	0.0561816	0	0	0.0190364	0.0330059	0.0185359	0	0	0.020151	0.0447149	0.042386	0	0	0.0529636	0.051706	0.0300562	0.0247441	0	0.0193043	0.0338045	0.0370847	0.0224255	0.0690676	0.236091	0.0264641	0.51617	0.30716	0.106173	0.294429	0.101771
AC130650.2	0.0802826	0.317749	0.115893	0.0694743	0.142952	0.0978417	0.15783	0.148585	0.0599279	0.135823	0.175039	0.173311	0.0689015	0.095419	0.0555883	0.130604	0.138996	0.124152	0.197665	0.160339	0.0720057	0.138305	0.0784746	0.209326	0.135189	0.118373	0.0683308	0.127799	0.0496274	0.100806	0.18003	0.138044	0.125962	0.221348	0.190618	0.0784644	0.149082	0.110187	0.182232	0.0705583	0.0568896	0.328524	0.0842234	0.318891	0	0.58441	0.0673354	0.354785	0.129088
AL133243.2	0.370261	0.459261	0.354342	0.320413	0.503296	0.638186	0.187176	0.426764	0.177676	0.375236	0.155689	0.578068	0.671211	0.183886	0.494431	0.356649	0.728045	0.276068	0.673951	0.514993	0.533713	0.366887	0.205818	0.57407	0.392101	0.426161	0.443165	0.198924	0.315294	0.278947	0.51241	0.350809	0.323663	0.656261	0.310834	0.325688	0.419903	0.31761	0.317816	0.444537	0.442755	0.584412	0.610399	1.24403	0.181981	1.27063	0.249548	0.77507	0.287044
AC005089.1	0.00956513	0.0255539	0.0388347	0.00827739	0.057482	0.0104914	0	0	0	0.0198602	0.0125128	0.0464598	0.0211092	0.0102317	0	0.00737079	0.00993627	0.0190181	0.0105977	0.0286549	0.008579	0.0078054	0	0.0448915	0.00630271	0	0.0091588	0.0890743	0.00760213	0	0.0386089	0	0.0360181	0.061535	0.0306597	0.00841365	0.0159859	0.0393839	0.0114944	0.0063049	0	0.234848	0.391351	0.404933	0.614291	1.90086	0.649827	0.760865	0.0519075
AC012213.3	0.0827624	0.0982691	0	0.0477468	0.0276313	0.0605183	0.0650819	0	0.0617789	0.0381867	0	0.0669991	0.121765	0	0	0.0212586	0.143289	0	0.0305656	0.110194	0	0.0225121	0.0373378	0.0971061	0.0545342	0.104596	0	0	0	0.0415677	0.133626	0.060989	0	0	0	0.121332	0.046106	0	0.0994556	0.0181844	0.0659777	0	0.202591	0.207626	0	0	0.104123	0.115498	0.0499033
AC018766.1	0.0442881	0.0788792	0.143849	0	0.266151	0.0485772	0	0.0461067	0.198356	0.0613039	0.0579364	0.0537792	0.0977393	0.0947487	0.137995	0.034128	0	0.132085	0.0981383	0.265354	0.158889	0	0	0.0519638	0.0291826	0.0839581	0.212034	0.0634506	0.105597	0	0.143013	0.146865	0.0833849	0.0814049	0.236599	0.11687	0.0740172	0.091177	0.212884	0	0.141225	0.434955	0.0929241	0.333317	0.406324	0	0.668624	0.648961	1.52215
KIF1C-AS1	0.551513	0.261939	0.268699	0.0954526	0.294608	0.362954	0.130108	0.153109	0.0823366	0.127235	0.192393	0.535763	0.202855	0.707934	0.0572808	0.141663	0.190971	0.475176	0.162947	0.440587	0.164884	0.0300032	0.199049	0.388258	0.218043	0.487908	0.281645	0.184366	0.14611	0.1939	0.237455	0.162568	0.242288	0.236535	0.392844	0.129365	0.276517	0.252314	0.353468	0.121177	0.410352	0.451368	0.192861	0.242126	0.674651	0.321175	0.416313	0.307863	0.665092
AC002128.1	0.40086	0.732738	0.394027	0.07303	0.633943	0.347116	0.0746585	0.0878568	0.0236231	0.131417	0.193197	0.33305	0.279365	0.496498	0.197213	0.162578	0.635579	0.167794	0.303881	0.758452	0.132459	0.120515	0.214159	0.44558	0.222431	0.439954	0.0808066	0.226698	0.100609	0.158947	0.408768	0.303174	0.278059	0.484744	1.64558	0.241255	0.176301	0.275087	0.278887	0.111254	0.201829	0.103601	0.221335	0.734379	0.0967819	0.414666	0.716665	0.883288	0.26715
AC007216.3	0.100367	0.217063	0.0698557	0.0744467	0.0718045	0.0314533	0.0338252	0.0447806	0.0321085	0.119081	0.0562701	0	0.0791067	0.0306745	0.0223376	0.055244	0.0744722	0.0427621	0.0953156	0.143179	0.0385797	0.0351008	0.0776226	0.487869	0.0850296	0.135906	0.068645	0.0410837	0.0113956	0.0540103	0.300948	0.142641	0.107982	0.184482	0.107237	0.0504481	0.0838697	0.118073	0.0689204	0.0283531	0.0571513	0.140815	0.180503	0.202331	0.328864	0.34443	0.324696	0.420197	0.155618
WASHC5-AS1	0.182585	0.162596	0.088956	0.0948022	0.07315	0.12016	0	0.114049	0	0.0758206	0.0477704	0.0886853	0	0.23437	0	0.0844188	0.151735	0.0726058	0.0404591	0.291723	0.0327522	0.0595976	0.0741349	0.0856916	0.0721859	0.346131	0.104897	0.130793	0.0290228	0	0.117918	0.040365	0.0343767	0.0671209	0.2341	0.0642419	0.0915443	0.0501189	0.17553	0	0.145556	0.0896585	0.0383094	0.480953	0.167513	0	0	0.382206	0
AC007728.3	0.172403	0.0767645	0.0466641	0.0497309	0	0.157583	0	0.0897412	0.0321731	0	0.0375888	0	0.0317063	0.153681	0.17906	0.022142	0.119395	0.0285654	0	0.0573866	0.051543	0	0.0388893	0.0337138	0	0	0.0275132	0	0.022837	0.0432951	0.0695892	0	0.0540996	0	0.122803	0.0505496	0.0240109	0.0394367	0.0345295	0.0189401	0.0229065	0.070549	0.0602886	0.0810951	0	0	0	0.240595	0.051977
AL442067.1	0.0961231	0	0.0780526	0.166364	0.192552	0	0.226765	0	0.107628	0	0	0	0.212134	0.308464	0.599008	0.0740715	0.0998528	0.191119	0.213	0	0.25864	0	0.130096	0	0.126676	0.546669	0	0	0	0	0.310395	0	0	0	0.205406	0	0.240971	0	0.115511	0.0633601	0.153258	0.236007	0.907573	0.90429	0.881887	0.629748	0	0.201215	1.73878
AL355312.2	0.149689	0.115528	0.162064	0.0690861	0.0899562	0.22986	0.0117711	0.0415561	0.178779	0.0759735	0	0.0484714	0.154162	0.0747227	0.139922	0.0615193	0.124398	0.0992076	0.132679	0.199304	0.179009	0.0325734	0.121556	0.304429	0.0789071	0.0378359	0.0191107	0.0857824	0.0713814	0.127809	0.217515	0.0551542	0.0845494	0.0917132	0.106624	0.140447	0.133424	0.0821782	0.0239842	0.0394673	0.0556879	0.0245016	0.722368	0.450629	0	0.610202	0	0.271566	0.0541548
UCKL1-AS1	0.172579	0.323269	0.164296	0.0669476	0.387429	0.130546	0.0421171	0.0495628	0.0266531	0.0370683	0.0700642	0.0939419	0.131332	0.178239	0.0463558	0.0137573	0.333822	0.0769093	0.0923077	0.213933	0.0640495	0.0631301	0.136922	0.363083	0.0588188	0.112814	0.0968692	0.302667	0.047297	0.0986339	0.245011	0.210499	0.084033	0.207829	0.336993	0.0628151	0.188968	0.208275	0.092967	0.0784525	0.166043	0.336058	0.611824	0.94614	0.218391	0.22093	0.224607	0.90938	0.0753537
SNHG17	2.26849	3.20578	4.1165	1.33827	3.05682	1.89843	2.86306	4.88321	2.3852	3.17196	2.15032	1.48613	1.63864	4.01507	1.56363	1.37321	2.41503	4.30676	3.20555	2.08632	3.36653	2.16037	3.38559	6.89746	3.56652	2.15507	1.09342	1.55164	1.23316	3.52996	2.88546	2.05471	1.64383	1.78834	3.77519	5.77451	2.40911	1.89057	2.4676	1.61343	4.23328	7.16647	9.65905	19.6502	18.3459	15.2757	4.61919	16.3041	6.28031
AL592166.1	0.252182	0.199621	0.204773	0.121239	0.196453	0.122935	0.264411	0.116683	0.15687	0.116357	0.219931	0.170125	0.371026	0.0899184	0.305572	0.10796	0.203752	0.194992	0.0620901	0.111923	0.0753942	0.114326	0.11377	0.0657529	0.295412	0.0531186	0.214639	0.200719	0.0890791	0.126659	0.248823	0.0619457	0.342913	0.257516	0.17963	0.172529	0.257561	0.115372	0.202031	0.110818	0.111688	0.137594	0.176374	0.369045	0.128536	0.489529	1.37483	0.175965	0.253431
MIR34AHG	0.0476344	0.084839	0.0773588	0	0.0954202	0.104495	0	0.198361	0.0533358	0	0	0.173528	0.105124	0.0509537	0.0742104	0.0367065	0.0989652	0.0947102	0	0.0475671	0.12817	0.0777417	0	0	0.0313875	0	0	0.0682446	0.0378586	0.10766	0.0384545	0	0	0.175111	0.10179	0.0837999	0.0398048	0.0326886	0.0572422	0.0313984	0.0379738	0.350864	0.0999451	0.313688	0.655536	0.104025	0	0.29914	0.775497
GHRLOS	0.275456	0.390249	0.223672	0.108351	0.288434	0.219732	0.118151	0.351941	0.140193	0.121319	0.360343	0.288875	0.221055	0.294651	0.253581	0.202615	0.533268	0.18671	0.124851	0.28757	0.112299	0.173693	0.203351	0.190979	0.140254	0.332302	0.191821	0.269072	0.0995115	0.160359	0.18194	0.470563	0.094295	0.23014	0.361201	0.165201	0.251105	0.189029	0.1956	0.140302	0.129759	0.215191	0.144488	0.459381	0.689232	0.328116	0.661594	0.209678	0.0226489
EIPR1-IT1	0.0597088	0.053172	0	0	0.0299019	0.0327456	0	0	0.0334277	0	0	0.0362523	0.0329428	0	0	0.0230055	0	0	0	0	0.0267765	0.0487239	0.020203	0.0350285	0	0	0	0	0	0	0	0	0	0	0.0637961	0	0	0.061462	0	0.059036	0.0237998	0	0.0313198	0.0561717	0	0.130393	0.225358	0.812428	0.108008
ACSL3-AS1	0	0.0710941	0	0	0.079961	0.0437828	0.188338	0.0415561	0	0.0276267	0.0522183	0	0.132139	0	0	0	0.0829318	0	0.0442262	0.0398607	0	0.0325734	0	0.0936703	0	0	0.0382214	0	0.1269	0.0300727	0.128898	0.0441234	0	0.0733705	0.0426495	0.0702234	0.033356	0.0273927	0.0479683	0.0789346	0.127287	0	0.0418764	0.30042	0	0.0871718	0	0	0.361032
Z98884.2	0.436345	0.388575	1.06294	0.472001	1.0926	1.07686	0.38602	0.283914	0.427501	0.603992	0.356759	0.728551	0.421299	0.350064	0.424869	0.546395	1.35983	0.542234	0.362587	0.871459	0.39136	0.222543	0.406012	0.83195	0.682858	0.723792	0.731166	0.546999	0.346796	0.452009	0.880637	1.20581	0.410771	1.05267	1.80658	0.239885	1.27618	0.449157	0.655445	0.503333	0.913111	0.267835	1.02997	2.15511	0.250204	1.31024	0	1.71263	1.0853
AL121906.2	0.0889438	0.290424	0.16852	0.0769694	0.356341	0.162596	0.209829	0.154327	0.0331966	0.205194	0.193923	0.180008	0.163575	0.253712	0	0.159925	0.18479	0.117897	0.262788	0.296061	0.292505	0.0725805	0.0802529	0.382649	0.156286	0.112409	0.0567769	0.0849518	0.0471269	0.312707	0.215409	0.0655442	0.0837309	0.245228	0.538517	0.156473	0.0990991	0.142419	0.17814	0.117255	0.283622	0.21838	0.342136	0.306808	0.680016	0.194237	0	1.11712	0.0536305
AC025034.1	0.12528	0.167347	0.315358	0.0650484	0.213315	0.164896	0.0886651	0.0652123	0.0561101	0.199426	0.081944	0.136915	0.152064	0.120609	0.0975883	0.106194	0.364396	0.0871821	0.0971632	0.212676	0.292147	0.122678	0.135647	0.455678	0.156846	0.403745	0.0599792	0.242306	0.0398279	0.235959	0.283183	0.387749	0.176906	0.253302	0.42834	0.0661192	0.230314	0.128959	0.165604	0.140384	0.0998728	0.123038	0.0920009	0.306433	0.402287	0.492462	0.0472843	0.15735	0.226621
AC015922.3	6.30638	6.39059	6.35687	4.83903	4.04498	6.26969	5.27673	4.85123	4.83501	5.67621	5.56761	6.79021	6.30744	4.75199	8.76006	6.65505	5.22795	4.32373	8.91465	4.83944	6.15774	5.39967	6.68524	6.67035	6.69372	10.1295	8.23969	2.93749	6.29605	7.95751	5.19135	8.1728	5.41035	4.76797	5.3108	6.25767	6.3082	5.96923	6.64508	5.77458	3.44241	3.43236	1.27104	0.701414	2.28012	2.71369	0.469006	1.75582	1.2363
AC093157.2	0.223619	0.426723	0.18158	0.304092	0.191978	0.280314	0.452179	0.266058	0.286153	0.265315	0.250741	0.155166	0.246752	0.444232	0.298611	0.295403	0.398221	0.0952748	0.389335	0.287104	0.200564	0.208547	0.259417	0.299857	0.189448	0.42392	0.152942	0.617863	0.228506	0.288806	0.206313	0.247183	0.150366	0.35231	0.273059	0.646296	0.213558	0.131534	0.268723	0.0842283	0.356535	0.627476	0.0670272	0.270478	0.146543	0.279054	0	0.267487	0.231147
AC079684.2	0.931976	0.30577	0.35847	0.0848953	0.540423	0.269009	0.231435	0.102131	0.164767	0.441332	0.0641676	0.17869	0.162377	0.262348	0.152836	0.188993	0.305728	0.146291	0.108693	0.489822	0.395949	0.320218	0.199163	0.517973	0.323212	0.650916	0.140903	0.210824	0.233909	0.0739088	0.158394	0.271101	0.230883	0.405721	0.419273	0.215732	0.286923	0.134644	0.412616	0.290992	0.234621	0	0.668969	1.1075	0.450025	1.39255	0	0.616078	0.798567
AL031667.3	0.0654518	0.0874295	0.106294	0.02832	0.0983338	0.0358952	0.038602	0.0340697	0.0732858	0.0905988	0.0856221	0.158957	0.108334	0.0350064	0.101969	0.0504365	0.0339957	0.0976021	0.253811	0.0326797	0.0880559	0.160231	0.0221461	0.115193	0.10782	0	0	0.0937713	0.0260097	0	0.0792573	0.0361744	0	0.0601526	0.174831	0.0575725	0.0820405	0.0449157	0.196634	0.0862857	0.0782667	0.160701	0.274658	0.307873	0.150123	0.643208	0.247033	0.548043	0
AC009318.2	1.15244	1.34882	1.14969	0.683857	0.791504	0.794546	0.582588	0.582743	0.294945	0.638088	0.603037	1.03957	0.762997	0.880537	0.769463	0.888061	1.33398	0.589211	0.912038	0.62473	0.885969	0.617993	0.869006	0.502237	0.802767	2.18472	0.725149	0.613258	0.628069	0.520938	0.877187	1.23749	0.681937	1.14992	1.54796	0.666152	0.96302	0.632684	0.751799	0.781343	0.603732	0.404221	0.759951	1.7037	0.755226	0.86288	0.124276	1.44745	0.357372
AC079336.5	0.656893	0.561887	0.659733	0.329106	0.597338	0.25597	0.0509765	0.161968	0.0483893	0.496513	0.271367	0.43032	0.133524	0.332843	0.188518	0.333023	0.843998	0.438226	0.229833	0.491974	0.364355	0.416138	0.350945	0.578056	0.387281	0.327708	0.0993139	0.253854	0.309128	0.45582	0.362837	0.640127	0.480068	0.51633	0.858855	0.129248	0.577812	0.456719	0.249281	0.455784	0.406534	0.0212216	0.190419	0.243939	0.515441	0.188755	1.04392	0.253304	0.12508
AC068790.4	0.163007	0.145162	0.132363	0.0705309	0.2449	0	0	0.254551	0	0.169227	0.106621	0	0.269805	0.0871832	0	0	0.253998	0	0	0.0813886	0.0731009	0.0665091	0.11031	0.191258	0.161114	0.463526	0	0.233537	0	0	0.0657966	0.0900922	0.0767267	0.14981	0.174166	0.071692	0.0681071	0.111862	0.097943	0.214894	0.0649743	0	0	0.383377	0.37388	0.177989	0.615236	0.682449	0
ZNF252P-AS1	0.125857	0.200562	0.150606	0.0229291	0.0729805	0.0435934	0.101575	0.110337	0.0593353	0.105444	0.155977	0.0482617	0.0511651	0.0637709	0.0309592	0.0765665	0.116978	0.0329261	0.0954088	0.152138	0.112882	0.0918919	0.0986174	0.0233163	0.0785657	0.125574	0.0443987	0.0806662	0.100028	0.0698662	0.0909075	0.0585766	0.0935374	0.10958	0.212325	0.0407864	0.127311	0.122734	0.278605	0.0916919	0.063368	0.374067	0.257121	0.342741	0.182318	0.144658	0.100004	0.221859	0.0838764
AC127502.2	0.674702	0.966211	0.562669	0.134132	0.684906	0.830048	0.258113	0.237299	0.479818	0.309206	0.524804	0.87465	0.533222	0.195059	0.53977	0.112415	0.852423	0.389758	0.393972	0.764797	0.351637	0.148804	0.265311	0.545587	0.300391	0.656809	0.349211	0.189407	0.166668	0.309106	0.618281	0.352743	0.394828	0.70387	0.818305	0.505259	0.449518	0.206477	0.71218	0.306505	0.305277	0.179088	0.219998	0.926368	0.669199	0.49778	0.58501	2.5766	0.527774
AC013731.1	0.218481	0.216181	0.157696	0.042015	0.0243143	0.133133	0.143173	0.227453	0.0271813	0.117609	0.190541	0.117912	0.026787	0.10387	0.0378196	0.168359	0.176523	0.168934	0.0268963	0.193932	0.130638	0.0594289	0.0821388	0.170898	0.0799794	0.13806	0.0232445	0.0695585	0.15435	0.0731554	0.117584	0.21467	0.182823	0.0669309	0.181562	0.0854133	0.202856	0.099954	0.0875164	0.128012	0.0774099	0	0.101869	0.228377	1.11359	0.954249	0.183247	0.711432	0.263476
AC008764.8	0.299797	0.351284	0.256249	0.116063	0.260764	0.233642	0.0465299	0.0821334	0.159006	0.158348	0.113527	0.201182	0.165405	0.194101	0.184365	0.133748	0.270452	0.188235	0.131116	0.354521	0.120292	0.135197	0.138811	0.0555403	0.213139	0.314078	0.181302	0.259968	0.112865	0.136705	0.267497	0.331388	0.22281	0.130512	0.345607	0.0902153	0.237335	0.205733	0.227536	0.145609	0.182392	0.135593	0.223469	0.712515	0.579053	0.396267	0.714642	0.462418	0.299695
AC245128.3	0	0.0255197	0	0.0495979	0.0574052	0.188594	0.338026	0	0.128348	0.119002	0.0374883	0.104395	0.0948646	0.030654	0.133936	0.242911	0.0893069	0.028489	0.984269	0	0.0514052	0.0233849	0.0387853	0	0	0.271629	0.0274397	0.0615844	0	0.0863586	0.532091	0.0316768	0	0.0790107	0	0.403315	0.263414	0.0196656	0.172186	0.0377789	0	0	0.57121	0.323513	0.262915	0.187746	0	0.179964	0.155514
AC078846.1	0.257238	0.361131	0.262941	0.123088	0.221273	0.235678	0.192765	0.154379	0.254141	0.121483	0.217742	0.224167	0.253794	0.213656	0.235738	0.160912	0.235781	0.21361	0.204534	0.377757	0.165574	0.197565	0.139262	0.223702	0.141583	0.183587	0.240514	0.17343	0.120262	0.225717	0.298059	0.240856	0.185182	0.250318	0.40742	0.183678	0.285765	0.280367	0.221841	0.167565	0.207481	0.133747	0.155569	0.301787	0.513656	0.878991	0.2056	0.449787	0.290141
AL365356.1	0.0151809	0.0270379	0.012327	0.0131371	0.0608202	0.0166511	0	0	0	0	0	0	0	0	0	0	0.0946197	0.0452758	0	0.0454785	0	0	0	0.0356239	0	0.0575577	0	0	0	0	0.0490213	0.0839031	0.0142912	0.0279037	0	0	0.0253713	0.0312533	0	0	0.0121021	0	0.0159261	0.0428449	0	0	0	0.0953351	0
AL358115.1	0.232104	0.218852	0.210642	0.129966	0.341872	0.164729	0	0.0852827	0.0305747	0.132292	0.125025	0.116053	0.210918	0.0438137	0.085082	0.136773	0.453853	0.122158	0.0302541	0.190874	0.159192	0.0445653	0.12935	0.256311	0.12595	0.0517653	0.0653658	0.117363	0.054256	0.113146	0.242484	0.105643	0.128529	0.351337	0.568923	0.0360286	0.23959	0.168649	0.16407	0.152992	0.0761896	0.100566	0.315113	0.744973	0	0.83485	0.56684	0.400124	0.148184
AC245884.10	0.127213	0.0566432	0.051649	0.0550434	0.0637078	0.2093	0	0.132437	0	0	0.0832084	0.0772378	0.0701867	0	0.0990941	0	0.198224	0	0.0704732	0.0635169	0	0	0.172175	0	0	0	0	0.0455639	0	0.0479201	0	0.140619	0	0	0	0.0559495	0	0.0436495	0	0	0	0	0.200187	0.119678	0.583563	0.416717	0	0	0
RBM26-AS1	0.263152	0.606235	0.18581	0.138615	0.395356	0.313736	0.425117	0.285869	0.512434	0.150454	0.299346	0.180613	0.22725	0.324325	0.347583	0.251274	0.225821	0.278671	0.551429	0.34847	0.318117	0.172725	0.232277	0.214789	0.444803	0.336191	0.115031	0.241779	0.345547	0.293071	0.240148	0.240294	0.204646	0.462663	0.336177	0.135865	0.296385	0.561386	0.501843	0.184771	0.26451	0.210687	0.258065	0.322909	0.603576	0.12493	0.0431831	0.694561	0.17592
AC011330.2	0.270053	0.210427	0.411159	0.116848	0.371913	0.296206	0.0398178	0.351427	0.113391	0.210268	0.441594	0.163963	0.0744973	0.252763	0.10518	0.234113	0.596129	0.167794	0.149603	0.067418	0.333041	0.137731	0.342655	0.237642	0.28916	0.447953	0.258581	0.241812	0.160974	0.4832	0.190758	0.410451	0.222447	0.310236	0.649213	0.20785	0.338498	0.370643	0.486784	0.178007	0.376748	0.248644	0.531204	0.698653	0.309702	0.884622	0.764442	0.211989	0.244251
AC009041.3	0.503969	0.388956	0.409225	0.348896	0.639375	0.479071	0.198153	0.489685	0.376193	0.302292	0.48347	0.081596	0.63025	0.503148	0.3664	0.284792	0.698031	0.400811	0.186124	0.905863	0.512279	0.411251	0.272835	0.512471	0.44277	0.318462	0.257365	0.168472	0.587461	0.480928	0.461092	0.371383	0.347916	0.216144	0.502569	0.236426	0.701887	0.507238	0.565245	0.553656	0.535681	1.15488	1.58612	0.758583	0.770614	0.146744	0.380424	3.58687	0.546981
AC007342.5	0.54039	0.499053	0.35754	0.632177	0.611411	0.537841	0.247886	0.625088	0.56025	0.152373	1.02111	1.0086	0.695674	0.524524	0.37417	0.663185	0.71729	0.586965	0.288275	0.299793	0.691114	0.21232	0.277654	0.986294	0.349482	0.720896	0.0574926	0.501799	0.421535	0.79916	0.807867	0.232296	0.320304	0.625397	0.748458	0.475336	0.610452	0.52192	0.61331	0.461742	0.550461	0.466835	0.377943	2.23121	0.964023	0.458934	0.22662	0.0837928	0.724087
AC007938.3	0.344068	0.18384	0.167631	0.119099	0.275692	0.264172	0.202924	0.250738	0.115575	0.166692	0.09002	0.376023	0.227797	0.404849	0.214412	0.212108	0.321677	0.205231	0.533696	0.240508	0.277736	0.196538	0.209553	0.565179	0.113358	0.456581	0.131781	0.197176	0.109383	0.388822	0.444418	0.190163	0.129561	0.758908	0.808767	0.151324	0.316266	0.306948	0.24808	0.181435	0.24686	0.253433	0.25267	0.841584	0.473501	1.72818	0.259722	2.16072	0.373434
LINC01355	0.645741	0.725822	0.335709	0.241922	0.280003	0.552802	0.074311	0.295137	0.189575	0.226185	0.406917	0.42075	0.382339	0.534902	0.374187	0.34286	1.19026	0.285749	0.392625	0.467895	0.250737	0.195997	0.306421	0.526663	0.313933	0.634467	0.520285	0.307439	0.0782346	0.305539	0.403687	0.383008	0.218694	0.738207	0.757257	0.166245	0.450765	0.41071	0.430578	0.329614	0.254252	0.309358	0.375895	1.91877	0.830859	1.22101	0.505275	1.82155	0.334757
AC004918.5	1.45993	1.69219	1.59944	0.561502	2.6924	1.32172	0.601357	0.940876	0.674626	0.801922	1.06102	0.900467	1.22739	0.669284	0.505433	1.08929	1.92581	0.806317	0.693227	2.56862	0.81059	0.775316	0.705684	1.3323	0.977253	0.83468	0.843184	0.514601	0.552531	0.907839	1.34695	1.53692	0.850796	2.02324	2.4017	0.631897	1.39424	1.17679	1.44807	0.947044	0.905214	1.25173	2.09074	2.04927	0.425212	1.11335	0.874632	5.33601	0.838376
FMR1-IT1	0.687435	0.667829	0.507455	0	0.563341	0.274185	0.221146	0.260241	0.34987	0.216262	0.327012	0.45532	0.482712	0.334245	0.486803	0.144472	0.649189	0.310638	0.346202	0.811276	0.168153	0.254984	0.169163	0.43995	0.247074	0.829301	0.239357	0.268601	0.298012	0.141245	0.302703	0.0690794	0.0588313	0.689212	0.934808	0.109942	0.208888	0.343088	0.300397	0.329546	0.19928	0.306878	0.852301	0.823088	3.15345	1.09181	0	1.43901	0.565231
AC018645.3	3.08816	4.12511	3.54015	2.0043	3.77536	4.73216	1.76776	1.89116	2.44079	2.38878	3.74279	3.74996	6.26401	2.91473	3.53757	2.65967	3.16081	2.21225	5.58515	3.21985	3.50296	3.48355	2.08981	5.91463	2.00494	4.39073	4.305	2.30976	2.27392	3.52405	3.7762	2.76098	2.39413	4.29894	2.18353	2.43677	2.31492	2.83602	3.1653	4.01128	3.58418	2.00706	2.33452	6.66492	3.33323	4.16541	0	3.80263	2.38235
AC245060.5	0.240848	0.370993	0.200856	0.101395	0.312948	0.471227	0.038391	0.0813203	0.0801738	0.0855984	0.119216	0.276653	0.186752	0.13926	0.152117	0.125402	0.554482	0.0517699	0.216363	0.669522	0.186826	0.0690539	0.10572	0.190939	0.124387	0.579982	0.311644	0.0559552	0.118991	0.122602	0.304786	0.237446	0.110302	0.430732	0.326885	0.0458062	0.141426	0.160813	0.26596	0.111558	0.0882174	0.0799112	0.57363	0.581761	0.328465	0.3696	0.245683	0.531421	0.164849
AC012065.3	0.195312	0.347859	0.436134	0.0422543	0.244528	0.0535566	0.0575953	0.203332	0.0546722	0.16897	0.191626	0.237168	0	0.208922	0.22821	0.0376263	0.253613	0.145625	0.162297	0.146277	0.0875878	0.478138	0.297384	0.171871	0.032174	0.370257	0.233768	0.104932	0.232843	0.073572	0.118254	0.269866	0.183865	0.224373	0.313022	0.0429499	0.122407	0.30157	0.117353	0.193111	0.155701	0.119885	0.204899	0.229677	0.671961	1.27958	0	1.12433	0.0883254
AC005387.2	0.194868	0.303685	0.395585	0.0421582	0.146383	0.0534349	0.0574644	0.304304	0.109096	0.101152	0.12746	0.118314	0	0.104224	0.303588	0.150163	0.151822	0.0484314	0	0	0.0873888	0	0.0989026	0.228641	0.0321008	0.092354	0.139942	0.0348978	0	0.0367024	0.0786569	0.215402	0	0.223864	0.312311	0.299966	0.244257	0.100295	0.117086	0.0642241	0.0776738	0.119613	0.255541	0.45831	0.446956	0.425557	0	0.305939	0.176249
AC105429.1	0.0321451	0.081107	0.0348027	0.0231812	0.0536604	0.0176291	0	0.0223101	0.00599878	0.0407876	0.0280342	0.0520453	0.0295587	0.040116	0	0.0288992	0.0723502	0.0532612	0.0296794	0.0374497	0.0240259	0.0262313	0.0398808	0.0754326	0.0458927	0.0304692	0.0205197	0.0614048	0.0127741	0.0726526	0.0389254	0.0592208	0.0151306	0.123094	0.108761	0.00471257	0.0268615	0.033089	0.00643814	0.0282515	0	0.197311	0.033723	0.181446	0.294917	0.269097	0.202208	0.482243	0.193826
AC006333.1	4.8406	3.59222	5.61395	6.12429	5.36994	2.86751	8.73327	7.70788	6.65491	7.1598	8.3095	4.07984	4.00037	4.60987	5.07523	4.98135	3.37349	6.70056	5.70259	5.81275	6.2467	7.73343	5.30748	3.71446	5.11411	4.72374	2.50327	3.26999	8.87125	5.4856	3.20698	6.43436	6.9507	4.77718	6.03394	4.95853	6.06744	6.32126	4.93336	5.36496	5.1859	2.13126	1.99271	1.87342	2.99816	1.85104	1.42612	2.22324	1.18227
LINC01655	0	0	0	0	0	0	0	0	0	0	0	0	0	0	0.0789473	0	0	0	0	0	0	0	0	0	0	0	0	0	0	0	0	0	0	0	0	0	0	0	0	0	0	0	0.637947	0.0476729	0	0.22133	0.956306	0	0.733331
AL391095.2	0.0427853	0.0476267	0.121597	0.0185126	0.0642801	0.0351966	0.0378508	0.0668133	0.0718596	0.0740297	0.0979484	0.0129886	0.0708171	0.217392	0.0833201	0.0329699	0.100002	0.11697	0.201467	0.0854499	0.0479679	0.0610994	0.0506687	0.451805	0.0845771	0.0405546	0.0102419	0.0229866	0.0255035	0.0564089	0.12089	0.0591174	0.0302083	0.058982	0.0228571	0.0846781	0.0268146	0.0440416	0.0257076	0.0282022	0.187595	0.0262622	0.089771	0.603762	0.637872	0.350384	0.242226	1.97039	0.174139
AC079766.1	0	0.0894087	0.244577	0	0.10056	0.220247	0.0592139	0.0522615	0	0.104231	0.197011	0.304791	0.221573	0.0536983	0.156415	0	0.208592	0.149718	0.111239	0.100259	0.180099	0.204823	0.0679425	0.0589004	0.198469	0.190331	0.0480676	0.0719206	0.119693	0.11346	0	0	0.0472579	0.138407	0.0536365	0.0883138	0.0419489	0.0688988	0.241302	0.099269	0.0800385	0	0.105329	0.0944527	0	0	0	0.735591	0
AC092171.1	0.0854002	0.152102	0.184921	0	0.171072	0.0624471	0.0335781	0.266721	0.031874	0.0197019	0.148957	0.138269	0.0314116	0.152252	0.133047	0.131617	0.147856	0.0565997	0.0315398	0.170559	0.12766	0.0464592	0.0385278	0.133602	0.0750298	0.10793	0.0272575	0.0611755	0.135748	0.0643389	0.0689423	0.188799	0.133992	0.235458	0.212908	0.125199	0.0237877	0.11721	0.0342085	0.09382	0.0907741	0.349466	0.298641	0.241024	0.652924	0.372998	0	0.178769	0.257469
PIK3IP1-AS1	0.310159	0.46034	0.139917	0.208758	0.414203	0.113399	0.0406501	0.107632	0.231522	0.0954055	0.270494	0.292932	0.114082	0.221182	0.214757	0.0796685	0.286395	0.0685203	0.15273	0.412962	0.0618184	0.224976	0.116606	0.283044	0.363328	0.261323	0.197989	0.320925	0.0547793	0.181742	0.250387	0.304749	0.0648847	0.31672	0.257749	0.181881	0.172786	0.165545	0.331305	0.136295	0.109892	0.423067	0.28923	0.583572	0.474262	0.376296	1.95105	0.28856	0.374034
AL928654.2	1.83044	2.40218	1.76013	0.500215	2.02634	1.3737	0.568187	0.551623	0.593286	0.633428	0.819182	1.81326	1.0099	1.28816	0.375221	0.37119	1.40108	0.909857	0.747174	1.20254	0.864069	0.589614	0.912719	1.13036	1.14264	1.73501	0.368986	0.96616	0.689112	0.943541	1.12771	2.02333	1.08831	1.37236	3.55122	0.889786	1.12706	1.25613	1.50502	0.539771	1.34402	0.354806	3.63845	2.85491	2.43064	6.31163	3.63611	3.42835	0.522807
AC012313.5	0.383232	0.288189	0.809086	0.250571	0.571497	0.607166	0.271226	0.372371	0.371889	0.159142	0.334222	0.548091	0.592027	0.409938	0.358227	0.472504	0.477723	0.372519	0.726543	0.510255	0.252063	0.243233	0.270866	0.349729	0.347919	0.274457	0.56266	0.213519	0.243667	0.359296	0.350628	0.301238	0.312668	0.665276	0.691543	0.299642	0.455454	0.455849	0.675445	0.325586	0.522763	0.104548	0.142949	0.208306	0.78133	0.0557941	0.160714	0.267408	0.077026
HMGA2-AS1	0.0142121	0.0474609	0.0173105	0.00614939	0.0142347	0.0545597	0.00838201	0	0.0238698	0.00491813	0.00464798	0.00431446	0.0392059	0.00380063	0.0387474	0.0164276	0.0295272	0.0141288	0.0157464	0	0.00318673	0.00579874	0.0144264	0.045857	0.00936474	0.0202067	0.0306189	0.0203614	0.00282386	0.0107072	0.037288	0.0235646	0.0100344	0.0163269	0.0379625	0.00625062	0.0178142	0.0146294	0.0170787	0.009368	0.0141623	0.31405	0.17519	0.244007	0.114091	0.131906	0.0402305	0.0520632	0.379201
PLAC4	0.00642486	0.0209788	0.00869504	0.00926647	0.00858009	0.0117451	0.00252616	0.00445911	0.00239795	0.0118578	0.0028016	0.00520114	0.0236316	0.0206177	0.00333647	0.00165031	0.0244719	0.0149035	0.00711843	0.00641579	0.00576247	0	0.0115941	0.0376918	0.00282233	0.0446591	0.00205064	0	0.0119147	0.0129076	0.0242045	0.00946917	0.0060483	0.0157458	0.020594	0.0113028	0.00894803	0.00734833	0.00257358	0.00564663	0.011951	0.00525822	0	0.358626	0.235781	0.1824	0.121246	0.484171	0.627588
LINC02441	12.1934	9.16399	16.8381	13.3409	14.1963	3.0667	45.8507	11.6025	7.69601	19.297	15.189	10.7983	12.7691	10.1769	10.1031	15.3509	4.15493	17.0633	15.2737	13.3783	20.3749	17.6186	14.8999	12.3019	16.1458	19.5817	2.08223	4.00566	27.4063	18.4602	10.3451	21.2905	24.0176	12.4552	20.2889	11.477	27.1928	21.1588	10.1263	20.1189	7.46062	2.00221	0.896247	1.57088	3.02829	0.508818	0.293129	2.19478	0.421466
SNHG11	2.33938	2.55829	2.32035	1.28588	2.53391	2.18147	2.72348	2.52271	2.37195	1.61382	2.48214	1.64706	1.65646	2.33123	2.07752	1.43864	1.91563	1.99992	1.68011	2.03171	1.78381	1.74111	1.60888	1.68087	1.2603	1.96462	1.37173	2.30899	1.41112	1.89449	1.907	2.02155	1.72165	1.84184	3.87548	2.04435	2.07585	1.97666	2.60978	1.66759	1.71915	4.26574	4.08503	5.19733	8.14468	6.09062	3.48003	10.9267	2.04006
AL133297.1	0.106116	0.188998	0.258501	0.0459149	0.21257	0.116393	0.062585	0.16571	0	0.0734433	0.069409	0	0.117094	0.227022	0	0.081772	0	0.105494	0.0587858	0.15895	0.0475879	0	0.0718105	0	0.0699226	0	0	0	0.0843385	0.0399729	0.128499	0	0.0998967	0	0.22676	0	0.221685	0.0728213	0.12752	0.174868	0.0422976	0.130271	0.278312	0.29949	0	0.231739	0	0.333201	1.15173
PLUT	0.0145128	0.012924	0	0	0	0.0318366	0	0	0	0	0	0	0	0.0155242	0.0226098	0	0	0.0144278	0	0.0289847	0	0.0118429	0.0196421	0	0	0.0275124	0	0	0	0	0.035148	0	0	0	0.0155063	0	0.0121274	0	0.0697603	0.00956621	0	0.285062	0.167477	0.641697	0	1.26774	0	0.243039	0.21002
AP000873.2	0.315861	0.338816	0.297285	0.155305	0.273222	0.283459	0.457252	0.209256	0.15272	0.158988	0.328682	0.287663	0.182189	0.261082	0.156573	0.287653	0.507089	0.292599	0.278376	0.408606	0.154525	0.216745	0.170027	0.320066	0.283812	0.353828	0.144348	0.293114	0.148341	0.227147	0.307146	0.285664	0.19598	0.31008	0.559914	0.202063	0.275941	0.310356	0.276051	0.17981	0.217466	0.405385	0.376551	0.61456	0.493957	0.188123	0.0541885	0.63114	0.142841
AL596247.1	0	0.259124	0.0787589	0	0.0485736	0.0531931	0.0572044	0	0	0	0	0	0.214053	0	0	0	0.151135	0.0482122	0.107464	0	0	0	0.131273	0.341409	0.0319556	0.0919361	0	0.0694798	0	0	0.234903	0.0536069	0	0.13371	0.0518163	0	0	0	0	0.0319667	0	0	0.050877	0.0456237	0	0.105908	0	0.101518	0
GNG12-AS1	0.253638	0.391141	0.482236	0.337266	0.41514	0.339269	0.284585	0.972485	0.187022	0.839183	0.534119	0.653545	0.457358	0.211756	0.616814	0.266957	0.404858	0.516601	1.0007	0.438606	0.771241	0.449287	0.414449	0.217753	0.240502	0.480827	0.746359	0.155101	0.373669	1.13253	0.589302	1.08043	1.00168	0.2729	0.779951	0.24487	0.501437	0.581603	0.914389	0.644279	0.419192	0.197456	0.227148	0.407387	0.0851345	0.202646	0.0233488	0.168347	0.134285
AC004908.2	0.298752	0.665114	0.363883	0.45243	0.299227	0.491526	0.264296	0.311019	0.585393	0.310151	0.537376	0.362775	0.453279	0.279624	0.639968	0.316546	0.543102	0.594001	0.372378	1.19332	0.16747	0.152368	0.176899	0.131449	0.147642	0.920322	0.250303	0.133755	0.267121	0.337611	0.633092	0.371513	0.210932	0.480488	0.758107	0.394181	0.312059	0.435659	0.403887	0.295386	0.148852	0.0916891	0.430948	0.878295	1.19915	1.14174	0	0.859898	1.6888
AC012186.2	0	0.594666	0.16267	0.173361	0.8026	0	0.157535	0.208557	0.224309	0.0924334	0.174712	0.729789	0.736851	0.0714305	0.208067	0	0.138736	0.199157	0.295943	0.266732	0	0	0.0451891	0.548453	0.176005	0.506364	0.191821	0.430515	0.212291	0.100617	0.269541	0.664325	0.125727	0.306853	0.499438	0.117477	0.223205	0.137476	0.401231	0.132049	0	0.65582	0.210165	0.628214	0.306325	0.437488	0.252036	0.139785	0.483176
FARSA-AS1	0	0	0	0.0769694	0	0	0	0.092596	0	0.123117	0	0	0.19629	0.0951418	0	0.0685392	0.0923949	0.0884224	0	0	0	0	0.0601897	0.104359	0	0	0	0.191142	0	0.0670086	0.071803	0	0.0837309	0.0817427	0.0950324	0.0782365	0.148649	0	0.106884	0.0586278	0	0.65514	0.279929	0.251025	0	0.388475	0	0.186187	0
AC016727.1	1.09197	0.855737	1.02856	0.859916	1.01715	1.34145	1.50701	1.42102	0.953687	1.16387	1.39992	1.35251	0.939851	0.911093	0.81658	1.00134	1.0436	0.998727	1.63331	1.10134	1.15569	1.0693	1.18233	0.935296	1.08649	1.26275	0.669175	1.31414	1.60557	0.839126	0.863903	1.0622	1.79896	1.34478	1.40007	0.749205	1.29574	1.42378	1.03666	0.834945	0.82699	0.482594	0.355128	0.852649	0.551011	0.572323	0.329714	0.845761	0.454316
AL008723.2	0.0477404	0	0.077531	0	0	0	0	0	0	0	0	0.115943	0	0	0	0	0	0.0474606	0.0528941	0	0	0.0389574	0.0323067	0.0560144	0.0629148	0.0905028	0	0.0683966	0	0.0359667	0.0385401	0	0.134827	0.0438753	0.0510085	0	0	0.0327615	0	0	0	0	0	0.134737	0	0	0	0.499677	0
[truncated: 465 more columns]
